# Supplementary material for: Effect of the Probiotic Bacillus subtilis DE-CA9TM on Fecal Scores, Serum Oxidative Stress Markers and Fecal and Serum Metabolome in Healthy Dogs
Source: MDPI journal article supplement (doi:10.3390/vetsci10090566), 2023-09-11
Supplement: s1 [file s1]

## Sheet: sub
									file id	210712bmgsa44_4	210714bmgsa33_3	210712bmgsa14_4	210712bmgsa09_4	210714bmgsa12_3	210713bmgsa39_2	210712bmgsa41_5	210714bmgsa15_3	210714bmgsa13_2	210715bmgsa06_2	210712bmgsa46_2	210714bmgsa44_4	210712bmgsa37_4	210712bmgsa36_4	210713bmgsa21_3	210712bmgsa48_2	210712bmgsa17_5	210713bmgsa44_4	210712bmgsa43_2	210714bmgsa38_2	210714bmgsa08_2	210712bmgsa28_2	210712bmgsa40_2	210713bmgsa37_2	210714bmgsa37_2	210712bmgsa07_2	210713bmgsa18_4	210714bmgsa24_2	210713bmgsa50_2	210712bmgsa49_2	210712bmgsa42_4	210714bmgsa48_4	210713bmgsa02_2	210714bmgsa42_4	210712bmgsa03_5	210713bmgsa48_3	210712bmgsa45_5	210713bmgsa42_2	210714bmgsa34_4	210714bmgsa20_2
Note: the BinBase algorithm replaces 'missing values' from raw data by using the quantification mass at the target retention index,									mx class	607519	607519	607519	607519	607519	607519	607519	607519	607519	607519	607519	607519	607519	607519	607519	607519	607519	607519	607519	607519	607519	607519	607519	607519	607519	607519	607519	607519	607519	607519	607519	607519	607519	607519	607519	607519	607519	607519	607519	607519
and subtracting the local minimum noise.									mx sample	607571	607561	607551	607541	607570	607560	607550	607540	607569	607559	607549	607539	607568	607558	607548	607538	607567	607557	607547	607537	607566	607556	607546	607536	607565	607555	607545	607535	607564	607554	607544	607534	607563	607553	607543	607533	607601	607581	607562	607552
Therefore, the data set has no missing values									label	D_01 - Baseline - Deerland - Feces_111	D_01 - Day20 - Deerland - Feces_121	D_01 - Day36 - Deerland - Feces_131	D_01 - Day46 - Deerland - Feces_141	D_02 - Baseline - Deerland - Feces_112	D_02 - Day20 - Deerland - Feces_122	D_02 - Day36 - Deerland - Feces_132	D_02 - Day46 - Deerland - Feces_142	D_03 - Baseline - Deerland - Feces_113	D_03 - Day20 - Deerland - Feces_123	D_03 - Day36 - Deerland - Feces_133	D_03 - Day46 - Deerland - Feces_143	D_04 - Baseline - Deerland - Feces_114	D_04 - Day20 - Deerland - Feces_124	D_04 - Day36 - Deerland - Feces_134	D_04 - Day46 - Deerland - Feces_144	D_05 - Baseline - Deerland - Feces_115	D_05 - Day20 - Deerland - Feces_125	D_05 - Day36 - Deerland - Feces_135	D_05 - Day46 - Deerland - Feces_145	D_06 - Baseline - Deerland - Feces_116	D_06 - Day20 - Deerland - Feces_126	D_06 - Day36 - Deerland - Feces_136	D_06 - Day46 - Deerland -Feces_146	D_07 - Baseline - Deerland - Feces_117	D_07 - Day20 - Deerland - Feces_127	D_07 - Day36 - Deerland - Feces_137	D_07 - Day46 - Deerland - Feces_147	D_08 - Baseline - Deerland - Feces_118	D_08 - Day20 - Deerland - Feces_128	D_08 - Day36 - Deerland - Feces_138	D_08 - Day46 - Deerland - Feces_148	D_09 - Baseline - Deerland - Feces_119	D_09 - Day20 - Deerland - Feces_129	D_09 - Day36 - Deerland - Feces_139	D_09 - Day46 - Deerland - Feces_149	D_1 (AMDR1)- HFD - Feces_081	D_1 (AMDR2)- HFD - Feces_101	D_10 - Baseline - Deerland - Feces_120	D_10 - Day20 - Deerland - Feces_130
To get insights which compounds are reliably found WITH HIGH QUALITY SPECTRA in which organs, see columns I-J									comment	feces	feces	feces	feces	feces	feces	feces	feces	feces	feces	feces	feces	feces	feces	feces	feces	feces	feces	feces	feces	feces	feces	feces	feces	feces	feces	feces	feces	feces	feces	feces	feces	feces	feces	feces	feces	feces	feces	feces	feces
However, see also note in sheet "sample analysis".									species	dog	dog	dog	dog	dog	dog	dog	dog	dog	dog	dog	dog	dog	dog	dog	dog	dog	dog	dog	dog	dog	dog	dog	dog	dog	dog	dog	dog	dog	dog	dog	dog	dog	dog	dog	dog	dog	dog	dog	dog
									organ	feces	feces	feces	feces	feces	feces	feces	feces	feces	feces	feces	feces	feces	feces	feces	feces	feces	feces	feces	feces	feces	feces	feces	feces	feces	feces	feces	feces	feces	feces	feces	feces	feces	feces	feces	feces	feces	feces	feces	feces
									treatment	No treatment	A	A	No treatment	No treatment	A	A	No treatment	No treatment	B	B	No treatment	No treatment	B	B	No treatment	No treatment	B	B	No treatment	No treatment	B	B	No treatment	No treatment	A	A	No treatment	No treatment	A	A	No treatment	No treatment	A	A	No treatment	feces - dog	feces - dog	No treatment	A
BinBase name	ret.index	quant mz	BB id	mass spec	PubChem	KEGG	InChI Key	Feces	Serum
xylulose	553450	173	31632	85:1861.0 86:702.0 87:1148.0 88:324.0 89:10095.0 90:1041.0 91:452.0 94:60.0 95:96.0 96:155.0 97:114.0 98:195.0 99:528.0 100:1225.0 101:2618.0 102:774.0 103:9082.0 104:930.0 106:381.0 108:16.0 109:127.0 110:14.0 111:327.0 112:10.0 113:567.0 114:3170.0 115:1092.0 116:1102.0 117:15978.0 118:1867.0 119:1700.0 120:3.0 125:55.0 126:826.0 128:264.0 129:1798.0 130:91.0 131:1527.0 132:491.0 133:5046.0 134…	439205	C00312	LQXVFWRQNMEDEE-PYHARJCCSA-N	0.48	0	16038	7415	5018	10047	9255	4388	15964	10311	7446	4988	3617	5508	5033	9783	4724	7370	3409	2810	10801	6487	3657	15822	4099	2467	9059	6253	2438	8245	24741	7005	9006	11168	100302	3773	3214	3421	1863	2070	11034	3827
xylose	543267	103	169	86:77.0 87:118.0 89:838.0 90:80.0 91:46.0 94:19.0 96:63.0 98:48.0 99:37.0 100:186.0 101:192.0 102:469.0 103:7719.0 104:659.0 105:379.0 106:26.0 112:23.0 114:254.0 115:75.0 117:652.0 118:60.0 119:80.0 120:23.0 121:17.0 124:30.0 127:70.0 128:49.0 129:515.0 130:102.0 131:344.0 133:894.0 134:104.0 135:66.0 137:49.0 142:48.0 143:43.0 144:51.0 145:65.0 147:2699.0 148:283.0 149:250.0 151:31.0 155:21.0 1…	135191	C00181	SRBFZHDQGSBBOR-IOVATXLUSA-N	0.82	0.88	1427441	89166	971161	709573	349038	88408	874013	1856467	260781	919219	125803	243184	511141	338437	231677	184908	305074	9931	126253	290937	150789	328351	113751	346013	284493	486441	101740	217374	689776	275858	247550	252346	1189705	109805	145559	123237	13959	23625	191136	98342
xanthurenic acid	795062	406	62287	86:1400.0 87:496.0 88:139.0 90:47.0 94:10.0 95:76.0 96:123.0 97:336.0 99:914.0 100:992.0 101:68.0 102:514.0 103:715.0 104:174.0 105:343.0 106:49.0 107:59.0 108:122.0 109:75.0 112:69.0 114:294.0 115:1393.0 116:4658.0 118:525.0 119:461.0 120:100.0 121:72.0 122:95.0 123:175.0 124:18.0 127:77.0 128:251.0 130:629.0 133:303.0 134:222.0 135:428.0 136:122.0 137:144.0 138:144.0 140:276.0 141:96.0 142:168.…	5699	C02470	FBZONXHGGPHHIY-UHFFFAOYSA-N	0.18	0	1550	154	522	785	267	571	1045	422	340	787	220	517	1764	1206	882	304	228	357	452	352	322	513	141	659	428	494	331	385	856	549	640	275	534	289	352	184	2536	335	515	661
xanthine	701688	353	1669	85:2517.0 86:3710.0 87:2079.0 88:382.0 89:398.0 90:80.0 91:121.0 92:294.0 93:389.0 94:217.0 95:887.0 96:502.0 97:447.0 98:2556.0 99:3280.0 100:20394.0 101:2912.0 102:1806.0 103:2337.0 104:350.0 105:1446.0 106:113.0 107:15.0 108:151.0 109:225.0 110:796.0 111:2460.0 112:928.0 113:1375.0 114:1007.0 115:2460.0 116:1524.0 117:4430.0 118:716.0 119:955.0 120:203.0 121:149.0 122:214.0 123:385.0 124:753.0…	1188	C00385	LRFVTYWOQMYALW-UHFFFAOYSA-N	0.54	0.84	21541	4643	16221	10215	41900	1527	19585	42230	5404	18066	1425	2569	5134	6745	2108	9822	11379	2751	7056	21049	6978	17276	2658	12314	7413	7449	513	28896	36492	32866	15397	18182	14007	3468	1809	2678	3503	16699	7740	6240
valine	312806	144	378468	85:1109.0 86:2240.0 87:742.0 88:232.0 90:193.0 96:354.0 97:432.0 98:556.0 99:364.0 100:7204.0 101:1488.0 102:781.0 103:1602.0 104:131.0 105:246.0 107:301.0 108:192.0 110:1316.0 112:71.0 113:468.0 114:1075.0 115:385.0 116:255.0 117:1100.0 119:598.0 120:351.0 121:367.0 125:147.0 127:1288.0 128:997.0 130:1279.0 131:1474.0 132:861.0 133:3654.0 134:323.0 136:131.0 140:432.0 142:285.0 143:235.0 144:338…	6287	C00183	KZSNJWFQEVHDMF-BYPYZUCNSA-N	0.99	0.96	85503	155900	199620	99977	140250	52521	169924	130458	139075	258185	154699	130743	444309	302128	92561	254697	156563	26024	82320	148010	162710	81715	44834	123155	161225	139105	131854	164494	113688	116909	46718	26057	153230	183180	409754	96210	486627	386390	194715	66324
uridine	856709	224	4705	85:3400.0 86:2032.0 87:2033.0 88:833.0 89:4255.0 90:331.0 91:52.0 92:133.0 93:460.0 94:986.0 95:954.0 96:3055.0 97:2191.0 98:2262.0 99:22400.0 100:12813.0 101:9196.0 102:3886.0 103:26772.0 104:2353.0 105:1631.0 106:284.0 107:23.0 108:453.0 109:659.0 110:906.0 111:2680.0 112:1258.0 113:6338.0 114:1321.0 115:5904.0 116:4089.0 117:10224.0 118:1211.0 119:1686.0 120:424.0 121:176.0 122:293.0 123:108.0…	6029	C00299	DRTQHJPVMGBUCF-XVFCMESISA-N	0.16	0	1244	1017	995	775	440	1243	2005	1011	489	668	710	548	574	452	1036	1120	241	947	949	651	615	1037	609	1183	442	1083	268	1742	1459	885	1247	659	844	839	292	1081	595	49	806	2190
uric acid	731038	441	33210	85:4856.0 86:9020.0 87:4408.0 88:1062.0 89:1050.0 90:204.0 91:153.0 92:381.0 93:399.0 94:335.0 95:743.0 96:628.0 97:867.0 98:4687.0 99:5449.0 100:50252.0 101:6099.0 102:3714.0 103:3425.0 104:525.0 105:1849.0 106:377.0 107:330.0 108:246.0 109:208.0 110:1153.0 111:2888.0 112:1185.0 113:2549.0 114:2894.0 115:4595.0 116:2358.0 117:6729.0 118:1287.0 119:1770.0 120:323.0 121:245.0 122:310.0 123:309.0 1…	1175	C00366	LEHOTFFKMJEONL-UHFFFAOYSA-N	0.57	0.99	1492	2904	497	570	2795	637	3074	2788	1205	5453	416	1225	1543	5107	1108	452	8043	716	1564	516	1601	6052	1063	5018	2278	786	667	1799	6450	826	704	508	4211	1788	113	1116	532	241	1221	213
urea	332913	189	22329	85:909.0 86:480.0 87:2088.0 88:270.0 89:261.0 90:103.0 91:370.0 92:189.0 98:128.0 99:5450.0 100:2969.0 101:723.0 102:453.0 105:15.0 109:1.0 110:167.0 111:355.0 112:66.0 113:419.0 114:580.0 115:280.0 116:227.0 117:418.0 118:204.0 119:37.0 126:66.0 128:58.0 130:1672.0 131:1022.0 132:911.0 133:155.0 136:25.0 139:32.0 140:58.0 141:95.0 142:3.0 143:224.0 146:996.0 147:18351.0 148:3137.0 149:1153.0 150…	1176	C00086	XSQUKJJJFZCRTK-UHFFFAOYSA-N	0.82	0.79	7718	15377	543	9752	2221	11360	25790	1455	5725	377	439	2200	693	9004	17486	245	16714	2087	2884	7026	492	8244	2418	12124	8348	13397	22917	9188	8900	12055	9853	5268	10529	18881	6503	35573	34689	5431	684	8325
uracil	385816	241	3023	85:7501.0 86:34329.0 87:5443.0 88:5529.0 89:1245.0 90:1710.0 91:2717.0 92:617.0 93:270.0 94:231.0 95:475.0 96:1929.0 97:2207.0 98:3686.0 99:85531.0 100:33488.0 101:12996.0 102:3481.0 103:1997.0 104:1436.0 105:2735.0 106:983.0 107:414.0 108:869.0 109:2764.0 110:7455.0 111:1656.0 112:1145.0 113:21290.0 114:3514.0 115:2496.0 116:1970.0 117:3949.0 118:6193.0 119:1613.0 120:1089.0 121:286.0 122:287.0 …	1174	C00106	ISAKRJDGNUQOIC-UHFFFAOYSA-N	0.92	0.45	78477	36446	54336	101804	199843	55693	77643	149348	76761	121535	18175	38295	153747	41469	27987	50130	253727	36552	31525	109012	268204	112913	40253	152692	156254	116405	8148	191460	319977	96910	113949	90395	32990	28099	60662	22613	13843	70191	24535	292865
UDP-glucuronic acid	585473	217	21705	85:836.0 86:140.0 89:1123.0 90:104.0 91:79.0 93:59.0 95:150.0 97:257.0 98:49.0 99:769.0 100:56.0 101:10488.0 102:871.0 103:3819.0 104:238.0 105:458.0 107:72.0 108:6.0 109:366.0 111:1096.0 112:28.0 113:631.0 114:58.0 115:828.0 116:9417.0 117:6717.0 118:797.0 119:682.0 120:43.0 121:42.0 122:1.0 123:812.0 124:139.0 125:97.0 126:23.0 127:433.0 129:8544.0 130:854.0 131:1568.0 132:223.0 133:3913.0 134:…	17473	C00167	HDYANYHVCAPMJV-LXQIFKJMSA-N	0.58	0.36	1082	4475	3510	196	793	6024	688	1132	872	3560	766	20562	4037	2738	5943	492	398	6923	582	1407	5076	1617	733	4746	805	4200	4247	1039	3081	3015	2298	821	3043	5991	5202	10707	24551	5106	5501	5379
tyrosol	510842	179	100888	85:805.0 86:240.0 87:781.0 88:1255.0 89:4759.0 92:585.0 94:111.0 100:69.0 102:2214.0 103:25928.0 104:3146.0 105:2603.0 106:474.0 107:744.0 108:34.0 109:532.0 111:360.0 116:1577.0 120:338.0 121:1138.0 122:218.0 123:179.0 125:94.0 126:2814.0 127:854.0 128:293.0 129:502.0 132:34.0 133:1181.0 135:2996.0 138:71.0 139:53.0 140:51.0 142:66.0 149:3188.0 150:697.0 151:2875.0 152:338.0 153:209.0 155:10.0 1…	10393	C06044	YCCILVSKPBXVIP-UHFFFAOYSA-N	0.48	0.09	5608	3588	2489	2169	1694	5835	4583	4280	11565	7596	2575	5508	5238	2718	3667	5125	8208	5657	12349	9019	3568	10956	4328	7001	3866	13245	3627	5521	6636	4282	2948	2119	4329	5085	3098	4041	547	600	4188	22051
tyrosine	671252	218	16	85:101.0 86:1059.0 87:458.0 89:659.0 90:823.0 91:1849.0 92:215.0 93:210.0 94:46.0 95:258.0 97:226.0 100:19804.0 101:2641.0 102:1366.0 103:1633.0 104:401.0 105:1066.0 107:424.0 113:79.0 115:546.0 116:116.0 117:900.0 118:715.0 119:703.0 120:181.0 121:365.0 123:63.0 124:32.0 125:60.0 128:317.0 129:136.0 130:2787.0 131:1381.0 132:2378.0 133:2406.0 135:1073.0 136:172.0 137:139.0 138:33.0 143:94.0 144:…	6057	C00082	OUYCCCASQSFEME-QMMMGPOBSA-N	1	0.99	172684	154853	85562	117453	33782	58452	57660	10455	118628	52069	96891	81234	19594	448457	58736	13546	32832	24412	146062	19861	25744	86244	17562	24336	66051	49399	78819	14273	122474	21477	168251	14574	139672	179348	51817	90447	438382	45735	152263	44997
tyramine	664737	174	17381	85:11423.0 86:497290.0 87:41826.0 88:17095.0 89:17977.0 90:14664.0 91:27350.0 92:2331.0 93:2206.0 94:330.0 95:3925.0 96:515.0 97:1154.0 98:878.0 99:5395.0 100:205535.0 101:29626.0 102:26271.0 103:11920.0 104:5738.0 105:13899.0 106:1612.0 107:5101.0 108:518.0 109:2410.0 110:608.0 111:694.0 112:272.0 113:5828.0 114:4885.0 115:9457.0 116:18813.0 117:32728.0 118:5975.0 119:8565.0 120:1487.0 121:7764.…	5610	C00483	DZGWFCGJZKJUFP-UHFFFAOYSA-N	0.86	0	210632	198973	36929	187751	1060073	1125003	695976	1018177	1241672	960917	929322	430347	812507	494112	1078164	791556	2251548	758143	606020	802112	1251055	809587	1264420	625574	970420	1310674	160287	691057	552865	876544	7587	811012	108020	189008	1275259	145484	446780	1158284	123061	964226
tryptophan	780482	202	14	86:650.0 87:425.0 89:261.0 100:3562.0 101:1584.0 102:1611.0 103:773.0 104:190.0 113:59.0 114:89.0 115:489.0 118:184.0 119:183.0 127:218.0 130:2243.0 131:264.0 132:923.0 133:652.0 144:250.0 145:420.0 146:217.0 147:2097.0 148:245.0 149:212.0 154:44.0 156:266.0 157:161.0 158:212.0 159:339.0 160:439.0 161:112.0 162:7.0 170:343.0 171:149.0 172:244.0 173:187.0 174:182.0 175:114.0 177:48.0 182:53.0 183:…	6305	C00078	QIVBCDIJIAJPQS-VIFPVBQESA-N	1	1	138618	57077	30731	65061	150275	26112	167437	192173	306948	140469	236096	50449	295509	195194	36047	237513	22783	14628	74602	124345	124796	113396	145056	103869	110396	119166	35762	152233	114498	256323	290418	226915	46023	34671	155407	41341	186027	150149	193709	21131
trans-4-hydroxyproline	484934	140	97	86:372.0 89:284.0 90:59.0 91:69.0 92:49.0 93:31.0 94:113.0 98:417.0 99:325.0 100:732.0 101:893.0 102:221.0 103:507.0 104:90.0 105:127.0 108:76.0 113:184.0 115:459.0 116:227.0 117:406.0 118:167.0 119:229.0 121:37.0 122:66.0 124:225.0 129:565.0 131:516.0 132:187.0 133:938.0 135:153.0 137:32.0 138:53.0 140:11400.0 141:1426.0 142:1450.0 143:252.0 144:87.0 145:79.0 147:2770.0 148:205.0 149:527.0 150:1…	5810	C01157	PMMYEEVYMWASQN-DMTCNVIQSA-N	0.53	0.98	23542	59441	47023	79792	25360	14674	62398	28974	39246	35086	29727	12471	48542	50945	15314	29248	19618	12318	21285	36373	28275	26745	17548	47556	35277	17942	21213	51970	50049	37692	47040	31169	14632	40804	25256	14897	25808	40930	16934	13721
tocopherol gamma-	1026121	223	4545	85:7.0 86:92.0 88:26.0 91:52.0 94:33.0 95:97.0 97:79.0 99:8.0 104:48.0 105:82.0 107:5.0 109:87.0 111:9.0 112:41.0 119:199.0 120:6.0 121:33.0 123:9.0 124:39.0 125:5.0 128:3.0 134:117.0 135:2.0 137:39.0 139:30.0 140:62.0 142:25.0 145:87.0 147:25.0 148:47.0 149:122.0 151:89.0 152:36.0 156:203.0 157:48.0 161:33.0 163:63.0 164:25.0 165:36.0 166:24.0 167:21.0 171:4.0 172:8.0 173:43.0 174:147.0 175:27.0…	92729	C02483	QUEDXNHFTDJVIY-DQCZWYHMSA-N	0.54	0.01	8366	17767	12889	14893	4940	14013	10594	9092	7619	16660	15387	19653	1389	18890	12182	8158	4322	22531	36559	13824	4094	15575	6562	15466	7027	19024	21993	15127	2830	12666	6421	8806	7211	20610	7666	24719	144	211	14296	20876
tocopherol delta-	997765	208	105385	85:45.0 87:79.0 90:67.0 91:816.0 93:148.0 95:320.0 97:560.0 98:80.0 102:47.0 105:364.0 107:175.0 108:92.0 109:305.0 111:200.0 115:140.0 116:110.0 117:258.0 118:63.0 119:135.0 120:77.0 121:212.0 123:148.0 128:77.0 131:335.0 132:57.0 134:84.0 135:258.0 136:43.0 137:226.0 140:24.0 141:83.0 144:82.0 145:135.0 146:54.0 147:394.0 149:309.0 151:240.0 152:62.0 159:67.0 161:169.0 163:177.0 164:44.0 165:55…	92094	C14151	GZIFEOYASATJEH-VHFRWLAGSA-N	0.46	0	2112	14951	7025	11302	5495	9913	6112	4505	7776	5935	9992	762	7092	14965	8407	4114	4991	14849	23244	8825	4738	10714	3742	9620	7347	11699	19119	8559	5372	5780	4402	4668	6482	13530	5168	24673	970	236	7101	14848
tocopherol alpha-	1067809	237	100	85:207.0 87:84.0 88:72.0 91:780.0 92:83.0 93:140.0 94:40.0 95:435.0 97:218.0 99:100.0 103:358.0 105:440.0 106:76.0 107:223.0 108:54.0 109:243.0 110:64.0 111:199.0 112:52.0 113:56.0 115:104.0 116:123.0 117:293.0 119:705.0 120:82.0 121:197.0 129:158.0 131:400.0 134:108.0 135:351.0 136:189.0 141:89.0 145:154.0 147:430.0 149:213.0 159:143.0 161:190.0 162:65.0 163:233.0 164:77.0 174:64.0 175:152.0 177…	14985	C02477	NCYCYZXNIZJOKI-OVSJKPMPSA-N	0.95	0.99	63694	77254	44660	63655	28785	64751	34700	31039	57049	56164	55494	90849	33376	65938	56021	29479	38255	75120	159138	52931	29616	47315	25034	54113	45888	67468	85275	44867	36441	44751	27007	42826	47324	80746	32971	109676	1088	4876	115776	61817
tocopherol acetate	1081080	165	160771	89:71.0 91:1411.0 92:386.0 93:665.0 95:815.0 97:275.0 104:61.0 105:342.0 107:808.0 109:904.0 115:347.0 116:198.0 117:403.0 118:97.0 119:284.0 120:75.0 121:2779.0 122:325.0 125:234.0 127:250.0 128:171.0 133:448.0 135:1064.0 136:1879.0 137:1620.0 138:236.0 144:113.0 145:149.0 149:1294.0 150:232.0 151:355.0 152:376.0 160:102.0 161:519.0 163:212.0 164:9909.0 165:24472.0 166:2931.0 167:258.0 173:237.0…	86472	C13202	ZAKOWWREFLAJOT-CEFNRUSXSA-N	0.49	0	29211	5178	19922	15497	10210	4787	18665	14361	9044	3523	3878	4246	17080	10591	10331	13841	2098	12021	19610	22649	9971	14890	2476	23620	14060	8147	8577	26730	20096	23754	13644	15782	16891	5932	1610	2882	397	147	45032	22821
thymine	420133	255	1692	85:666.0 86:403.0 87:19.0 88:154.0 89:59.0 93:39.0 95:146.0 96:167.0 97:1054.0 98:449.0 99:544.0 100:1474.0 101:116.0 102:23.0 105:17.0 106:562.0 107:491.0 108:82.0 109:39.0 110:831.0 111:563.0 112:311.0 113:8547.0 114:897.0 115:368.0 117:358.0 118:32.0 119:29.0 120:1384.0 121:49.0 123:97.0 124:39.0 125:126.0 126:53.0 127:157.0 129:12.0 130:638.0 131:1043.0 132:150.0 133:491.0 134:105.0 136:32.0 …	1135	C00178	RWQNBRDOKXIBIV-UHFFFAOYSA-N	0.94	0	38135	4147	16993	21838	36755	11768	22011	43212	22648	27487	4854	3919	47655	10646	10957	12706	76129	8748	13798	35494	49380	36237	9334	33414	38783	25473	2704	32027	85000	26843	32980	24884	20591	4682	13557	2625	15888	14622	14222	52573
thymidine	349402	170	87703	85:2128.0 86:315.0 87:993.0 88:296.0 89:761.0 90:170.0 91:199.0 93:88.0 94:143.0 95:637.0 96:198.0 97:555.0 98:401.0 99:2720.0 100:964.0 101:6820.0 102:681.0 103:10367.0 104:790.0 105:668.0 109:307.0 111:3809.0 112:435.0 113:4473.0 114:564.0 115:1105.0 116:667.0 117:787.0 118:65.0 119:288.0 124:34.0 125:1815.0 126:288.0 127:3843.0 128:439.0 129:3217.0 130:471.0 131:1443.0 132:211.0 133:2376.0 134…	5789	C00214	IQFYYKKMVGJFEH-XLPZGREQSA-N	0.59	0.73	10224	7334	4245	5294	4779	4601	7494	2566	3343	2587	2693	2646	4300	11795	5268	3532	1650	5216	6671	3188	6293	7275	2984	4996	3471	3703	1860	3912	10211	5508	5150	3646	11838	4002	2203	2757	2016	403	5796	7426
threonine	408777	218	171298	85:3292.0 86:8314.0 87:9239.0 88:2146.0 89:1384.0 90:306.0 91:153.0 92:315.0 94:182.0 97:494.0 98:2338.0 100:29753.0 101:59367.0 102:12275.0 103:7014.0 104:972.0 105:1395.0 108:157.0 109:69.0 110:316.0 112:1534.0 113:915.0 114:5652.0 115:7842.0 116:2291.0 117:82641.0 118:9093.0 119:5575.0 120:42.0 121:295.0 122:99.0 125:29.0 128:17938.0 129:15821.0 130:16106.0 131:15835.0 132:12042.0 133:17512.0 …	6288	C00188	AYFVYJQAPQTCCC-GBXIJSLDSA-N	0.96	1	9269	23354	14722	10703	24936	10640	15154	9963	25905	48043	25283	49539	13464	64091	26300	12344	14474	5737	11330	15703	16980	16309	9158	16162	15772	12804	37896	11949	18784	7942	4054	2527	14605	9147	14404	10676	30885	37235	9938	10300
threonic acid	495994	292	390230	89:571.0 90:94.0 91:633.0 97:143.0 98:231.0 99:220.0 100:69.0 101:471.0 102:1805.0 103:2662.0 104:366.0 105:490.0 107:232.0 108:128.0 110:533.0 113:56.0 115:731.0 116:269.0 117:2889.0 118:345.0 119:395.0 124:56.0 128:303.0 129:879.0 130:1406.0 131:1049.0 132:191.0 133:1619.0 135:300.0 141:64.0 142:43.0 143:652.0 144:27.0 147:9050.0 148:1319.0 149:1027.0 150:128.0 151:167.0 152:112.0 153:44.0 157:…	5460407	C01620	JPIJQSOTBSSVTP-STHAYSLISA-N	0.53	1	1319	446	1842	585	561	1121	700	333	3845	1655	6233	935	1909	1179	544	1612	434	739	504	1397	576	342	1590	1395	915	464	1956	1407	884	978	1623	2559	5029	814	936	545	1708	182	3613	535
threitol	467595	217	770	85:123.0 86:39.0 87:235.0 88:92.0 89:794.0 91:41.0 92:65.0 93:48.0 94:22.0 97:38.0 101:1040.0 102:87.0 103:5119.0 104:409.0 105:302.0 106:38.0 112:26.0 113:47.0 114:17.0 115:225.0 116:875.0 117:3651.0 118:353.0 119:290.0 129:736.0 131:620.0 132:62.0 133:1389.0 134:137.0 135:41.0 143:141.0 145:31.0 147:6122.0 148:886.0 149:553.0 151:42.0 165:22.0 175:40.0 189:971.0 190:191.0 191:521.0 192:94.0 193…	169019	C16884	UNXHWFMMPAWVPI-QWWZWVQMSA-N	0.46	0.91	8307	389	5065	1225	3967	306	4527	1720	253	342	389	921	1788	1920	261	1801	103	159	153	1690	333	137	180	591	262	634	916	940	1152	2631	5033	2965	8575	270	342	269	1495	1609	3897	148
taurine	556690	326	411	86:2130.0 87:334.0 88:217.0 89:78.0 92:47.0 93:57.0 97:88.0 98:93.0 99:119.0 100:4174.0 101:454.0 102:217.0 103:217.0 107:36.0 108:25.0 109:19.0 112:58.0 113:180.0 114:847.0 115:350.0 116:363.0 117:448.0 118:82.0 119:207.0 120:64.0 121:24.0 122:20.0 123:74.0 125:29.0 126:59.0 127:101.0 128:32.0 129:92.0 130:2016.0 131:964.0 132:316.0 133:2858.0 134:422.0 135:269.0 139:20.0 143:41.0 144:51.0 146:1…	1123	C00245	XOAAWQZATWQOTB-UHFFFAOYSA-N	0.38	0.66	20656	6250	15598	16924	2144	7795	3159	8023	9859	15885	31	53	6857	5964	1682	28	15259	3559	50	5139	12147	37	19	3603	18496	16101	628	9904	28961	2584	191135	63242	40589	94	2083	5091	2106	20	10423	10958
tartaric acid	532135	292	17321	85:5893.0 86:1306.0 87:6944.0 88:1444.0 89:2970.0 90:324.0 91:331.0 92:146.0 93:840.0 94:226.0 95:619.0 96:398.0 97:530.0 98:1088.0 99:9290.0 100:268.0 101:9775.0 102:96192.0 103:37044.0 104:7036.0 105:5919.0 106:640.0 107:342.0 108:150.0 109:64.0 110:100.0 111:386.0 112:83.0 113:2526.0 114:519.0 115:12244.0 116:4279.0 117:24886.0 118:2975.0 119:9567.0 120:1261.0 121:890.0 122:116.0 123:42.0 124:…	444305	C00898	FEWJPZIEWOKRBE-JCYAYHJZSA-N	0.2	0.5	133	109	159	21	33	35	53	59	53	72	24	108	60	90	73	41	55	22	37	38	28	32	15	107	45	28	110	63	52	52	58	34	55	43	21	73	4441	22	51	37
tagatose	631459	307	4833	85:334.0 87:230.0 88:1.0 89:7139.0 90:557.0 91:209.0 93:158.0 94:346.0 95:551.0 97:266.0 98:203.0 101:1898.0 103:15541.0 104:727.0 105:95.0 107:220.0 109:94.0 110:214.0 111:84.0 112:53.0 113:178.0 117:2074.0 118:87.0 120:300.0 121:119.0 123:192.0 124:85.0 125:12.0 126:15.0 128:153.0 129:1803.0 131:160.0 137:1.0 138:19.0 140:1895.0 141:1398.0 142:289.0 143:129.0 144:1676.0 145:382.0 147:616.0 150:…	439312	C00795	LKDRXBCSQODPBY-OEXCPVAWSA-N	0	0.81	2689	733	615	1219	1076	581	1537	746	1059	576	430	1007	642	2019	602	945	647	646	862	897	835	834	470	1511	817	1062	927	1340	1254	970	1879	1055	2012	904	468	682	1107	192	1346	832
sulfurol	408609	103	108301	85:26332.0 86:2632.0 87:4669.0 88:17305.0 89:2707.0 90:3272.0 91:6164.0 92:1298.0 93:1768.0 94:457.0 95:1002.0 96:747.0 97:10973.0 98:5597.0 99:6902.0 100:5425.0 101:3674.0 102:1027.0 103:178097.0 104:16960.0 105:6934.0 106:410.0 107:100.0 109:784.0 110:167.0 111:1475.0 112:20488.0 113:3028.0 114:1251.0 115:2151.0 116:753.0 117:903.0 118:149.0 119:292.0 120:76.0 121:53.0 123:188.0 124:1822.0 125:…	1136	C04294	BKAWJIRCKVUVED-UHFFFAOYSA-N	0.19	0	17647	5522	11768	5232	3340	9165	20576	5736	10362	10625	4022	10796	9724	5678	1753	10697	6650	8175	8411	6614	5388	11867	7673	13410	8622	4637	11032	18557	11999	20710	4160	6444	9280	7530	4529	5236	3672	7634	15068	8650
sucrose	918352	361	47180	87:1.0 89:322.0 101:230.0 103:3302.0 104:209.0 105:117.0 109:73.0 115:96.0 116:98.0 117:967.0 118:8.0 119:15.0 129:2403.0 130:183.0 131:488.0 132:5.0 133:831.0 134:4.0 139:1.0 142:3.0 143:335.0 144:86.0 145:114.0 147:3487.0 148:500.0 149:412.0 151:14.0 157:316.0 158:40.0 159:56.0 163:54.0 169:1579.0 170:193.0 171:113.0 173:84.0 175:11.0 178:19.0 181:25.0 182:9.0 183:85.0 184:26.0 187:6.0 189:510.…	5988	C00089	CZMRCDWAGMRECN-UGDNZRGBSA-N	0.77	0.55	1126	551	711	2476	341	681	355	919	495	361	1596	1096	390	98	637	245	541	402	340	483	53	69	141	697	242	101	92	665	60	486	775	465	412	591	63	737	3500	124	184	455
succinic acid	370608	247	161	85:303.0 87:764.0 88:359.0 89:340.0 91:55.0 92:42.0 95:84.0 98:86.0 99:324.0 101:577.0 102:330.0 103:701.0 104:172.0 105:342.0 106:78.0 107:93.0 111:30.0 113:629.0 114:213.0 115:891.0 116:1231.0 117:1124.0 118:170.0 119:320.0 120:104.0 124:22.0 126:77.0 128:196.0 129:6064.0 130:1045.0 131:1466.0 132:345.0 133:2204.0 135:234.0 136:65.0 137:16.0 138:15.0 142:39.0 143:223.0 145:378.0 147:57887.0 148…	1110	C00042	KDYFGRWQOYBRFD-UHFFFAOYSA-N	0.91	0.94	8582	12544	4641	4884	2065	7318	4740	2774	3337	2887	1944	9001	6428	80907	3170	2493	3589	4787	4560	9198	2586	2382	1172	4377	1929	4633	15968	4134	4672	3607	2727	4677	1012428	7913	2032	10325	261689	1568116	6439	2550
suberic acid	567452	169	183508	85:1080.0 89:602.0 90:161.0 92:236.0 93:4059.0 94:498.0 95:2680.0 97:3376.0 98:178.0 99:1117.0 101:1162.0 105:497.0 109:1125.0 110:1636.0 111:1917.0 112:204.0 114:176.0 115:764.0 116:785.0 117:5301.0 118:874.0 119:847.0 121:291.0 125:166.0 126:148.0 129:9266.0 130:168.0 131:717.0 132:732.0 133:688.0 138:3902.0 139:2965.0 140:588.0 142:68.0 143:591.0 145:376.0 147:8151.0 149:4835.0 150:1041.0 155:…	10457	C08278	TYFQFVWCELRYAO-UHFFFAOYSA-N	0.9	0.38	2891	3571	1900	1835	1598	1232	2682	1949	2532	1121	1898	3061	2631	2192	1266	1516	1315	2441	312	2153	1918	1618	1213	2427	3024	2178	4169	2459	2824	3688	2098	1635	3220	3724	979	3048	1836	680	4204	2804
spermidine	792924	144	1714	86:2249.0 87:97.0 88:90.0 98:50.0 99:209.0 100:1315.0 101:269.0 102:322.0 103:48.0 112:85.0 114:376.0 115:652.0 116:3899.0 117:324.0 118:176.0 123:24.0 126:189.0 128:490.0 129:447.0 130:615.0 131:43.0 132:12.0 140:80.0 142:727.0 144:4737.0 145:505.0 146:609.0 154:339.0 155:8.0 156:1970.0 157:646.0 158:219.0 159:4.0 160:1566.0 161:106.0 162:47.0 168:3.0 170:695.0 171:46.0 172:1272.0 173:230.0 174:…	1102	C00315	ATHGHQPFGPMSJY-UHFFFAOYSA-N	0.82	0	8645	4693	2691	5702	4953	9222	35380	18797	9363	3619	6734	3442	42688	4551	17124	3097	508	18809	31948	25448	4637	28232	4451	8938	6185	29346	9776	31401	16486	40215	5019	1799	16090	9720	12612	15278	8851	5391	6705	30776
sorbitol	667922	217	162	85:588.0 86:704.0 88:1768.0 89:8743.0 90:652.0 91:1094.0 92:168.0 93:127.0 94:89.0 97:2807.0 98:1048.0 99:1610.0 100:506.0 101:5089.0 102:848.0 103:48732.0 104:4923.0 105:2703.0 106:215.0 109:509.0 110:185.0 111:1108.0 112:146.0 113:1262.0 114:181.0 115:2342.0 116:957.0 117:28648.0 118:2694.0 119:2266.0 120:260.0 121:427.0 123:238.0 124:184.0 125:365.0 126:341.0 127:1107.0 129:20376.0 130:3176.0 …	5780	C00794	FBPFZTCFMRRESA-JGWLITMVSA-N	0.19	0.56	54285	49810	37859	3678	14735	7848	24356	29304	18382	9895	2429	14215	23025	7252	4116	19185	3860	2816	3065	20485	18278	2520	1520	25302	12588	22669	9817	36534	22375	37005	30313	28845	19557	2795	9987	31651	26973	4305	27587	2799
sophorose	962064	307	132242	85:2560.0 86:912.0 87:2091.0 88:1575.0 89:17628.0 90:1723.0 91:871.0 92:166.0 94:467.0 95:318.0 96:457.0 97:1134.0 98:607.0 99:3066.0 100:5575.0 101:9344.0 102:2677.0 103:111948.0 104:11428.0 105:6566.0 106:805.0 107:81.0 108:148.0 109:1522.0 110:714.0 111:1805.0 112:1834.0 113:3073.0 114:1598.0 115:2873.0 116:4294.0 117:43075.0 118:4276.0 119:2903.0 120:319.0 122:167.0 123:164.0 124:230.0 125:50…	441432	C08250	HIWPGCMGAMJNRG-BTLHAWITSA-N	0.32	0	3960	772	314	564	522	835	1180	406	1184	238	348	403	845	1443	1418	634	354	494	348	225	440	357	197	1125	340	347	1096	1028	1248	597	446	834	2646	415	149	410	297538	1028	1683	350
sinapinic acid	788416	338	3181	85:149.0 86:82.0 88:11.0 89:1714.0 90:180.0 91:795.0 92:279.0 95:109.0 96:25.0 97:76.0 98:125.0 99:254.0 100:79.0 102:188.0 103:397.0 104:203.0 105:264.0 106:126.0 108:57.0 109:148.0 111:161.0 113:90.0 114:48.0 115:608.0 116:321.0 117:1024.0 118:36.0 119:866.0 120:415.0 121:184.0 122:33.0 124:61.0 128:148.0 130:314.0 131:511.0 132:760.0 133:614.0 134:157.0 135:828.0 136:157.0 137:119.0 138:20.0 1…	637775	C00482	PCMORTLOPMLEFB-ONEGZZNKSA-N	0.2	0	1392	526	681	942	620	677	687	970	205	820	397	732	747	644	645	665	356	408	322	1055	558	705	345	943	873	775	783	659	806	689	1555	2647	1276	671	275	868	159	94	1933	837
shikimic acid	611100	204	286	85:149.0 87:51.0 89:152.0 90:30.0 91:290.0 92:189.0 93:498.0 94:99.0 95:323.0 96:150.0 97:191.0 98:58.0 99:248.0 100:45.0 101:676.0 103:796.0 104:122.0 105:435.0 107:157.0 108:97.0 109:114.0 111:293.0 112:57.0 113:62.0 114:60.0 115:150.0 116:435.0 117:504.0 118:76.0 119:240.0 121:261.0 122:62.0 123:242.0 125:205.0 126:81.0 128:58.0 131:777.0 132:71.0 133:2652.0 134:351.0 135:280.0 137:3.0 138:27.…	8742	C00493	JXOHGGNKMLTUBP-HSUXUTPPSA-N	0.66	0.31	7854	5795	4651	3125	3972	3194	5999	2717	4016	3266	2685	7086	3875	1960	3263	1704	1826	2314	3192	6455	2143	3825	2535	4688	1928	1788	4265	6779	4283	5851	5889	5339	8974	4185	896	2964	3191	10472	7793	3031
serine	338880	116	447	85:729.0 86:460.0 87:1346.0 88:1636.0 89:1066.0 91:401.0 94:40.0 96:261.0 100:1927.0 101:712.0 102:1579.0 103:5064.0 104:285.0 107:705.0 110:64.0 112:47.0 115:706.0 116:26936.0 117:3744.0 118:1543.0 119:218.0 127:473.0 130:3846.0 131:509.0 132:15017.0 133:3004.0 134:439.0 135:958.0 136:138.0 142:630.0 144:2343.0 145:74.0 146:1436.0 147:5127.0 148:1363.0 149:275.0 150:157.0 153:31.0 158:150.0 159:…	5951	C00065	MTCFGRXMJLQNBG-REOHCLBHSA-N	0.92	1	65945	107217	36562	75044	74488	37433	65258	74348	16709	70773	64055	44161	40202	253983	41373	28910	60546	25187	88726	51340	37270	119807	24673	40434	77059	66024	47796	27729	82113	39059	17417	19273	47737	20423	62087	51069	75522	89998	29279	55201
salicylic acid	480699	267	3063	85:285.0 86:220.0 87:2.0 89:1006.0 90:498.0 91:4530.0 92:934.0 93:295.0 94:14.0 95:336.0 96:295.0 98:121.0 99:41.0 100:8.0 102:149.0 103:549.0 104:235.0 105:892.0 106:168.0 107:90.0 108:111.0 109:204.0 111:75.0 112:87.0 115:867.0 116:172.0 117:148.0 118:237.0 119:617.0 120:447.0 121:352.0 122:47.0 123:228.0 124:84.0 126:602.0 128:74.0 129:64.0 130:169.0 131:828.0 132:86.0 133:2119.0 134:461.0 135…	338	C00805	YGSDEFSMJLZEOE-UHFFFAOYSA-N	0.28	0.39	3273	1372	2485	3212	870	1738	2643	2575	1764	2023	1524	288	2642	1016	1912	1634	1508	947	1547	2379	1160	1339	1558	2233	2077	1414	2175	2545	2749	4251	2936	1518	3227	3333	1740	1596	689	677	2904	1522
ribose	553135	217	1662	85:8071.0 86:9472.0 87:11706.0 88:7002.0 89:91105.0 90:8121.0 91:4369.0 92:716.0 93:150.0 94:1908.0 95:1008.0 96:977.0 97:1171.0 98:3992.0 99:8420.0 100:38767.0 101:35431.0 102:21246.0 103:1062555.0 104:101843.0 105:73545.0 106:4592.0 107:540.0 108:433.0 109:560.0 110:342.0 111:3649.0 112:4750.0 113:10117.0 114:23592.0 115:17668.0 116:13805.0 117:109230.0 118:11975.0 119:17425.0 120:1771.0 121:10…	5779	C00121	HMFHBZSHGGEWLO-SOOFDHNKSA-N	0.96	0.96	218128	223000	98284	239159	121526	95760	67414	41254	157315	66796	63374	104257	49954	239965	79193	57971	66892	103994	293747	121452	111177	266070	64611	82294	183083	156720	43128	66999	325541	91381	70248	52006	130566	129125	80815	119477	20436	16260	60825	145183
ribonic acid	597646	292	84543	86:34.0 87:189.0 88:350.0 89:1206.0 93:89.0 97:163.0 99:271.0 101:1055.0 102:1149.0 103:14449.0 104:1343.0 105:510.0 111:142.0 113:391.0 114:65.0 115:244.0 116:292.0 117:4183.0 118:357.0 119:78.0 125:85.0 129:1808.0 130:1437.0 131:1358.0 132:316.0 133:4108.0 134:646.0 135:379.0 141:281.0 142:49.0 143:1809.0 144:219.0 145:92.0 147:15767.0 148:2552.0 149:1820.0 150:145.0 151:61.0 157:484.0 159:32.0…	5460677	C01685	QXKAIJAYHKCRRA-BXXZVTAOSA-N	0.52	0.53	6233	2313	5005	3348	758	2827	1407	5606	4260	2151	2706	695	4435	2064	1755	3669	1976	2341	1027	3902	2740	1720	1963	4817	4591	2479	1933	7089	4946	3852	2423	3075	7655	2075	1030	2369	1763	346	10138	2872
ribitol	575497	217	7362	85:248.0 86:43.0 87:65.0 88:62.0 89:897.0 90:98.0 92:20.0 95:22.0 99:113.0 100:224.0 101:774.0 102:28.0 103:6316.0 104:624.0 105:415.0 107:35.0 109:433.0 110:374.0 111:71.0 112:1.0 113:273.0 114:80.0 115:19.0 116:274.0 117:7478.0 118:701.0 119:297.0 126:2.0 128:44.0 129:3713.0 130:874.0 131:1633.0 132:149.0 133:1838.0 134:180.0 135:129.0 136:1.0 140:1.0 142:152.0 143:478.0 145:98.0 146:11.0 147:7…	827	C00474	HEBKCHPVOIAQTA-ZXFHETKHSA-N	0.57	0.38	16159	2910	6395	1880	5866	1486	6926	3527	10069	1275	8386	4960	10917	5033	848	22658	487	386	2971	3948	3552	5679	3778	3372	3141	1775	963	1010	15114	14469	2312	6970	13088	4622	812	4339	8038	1082	5108	500
pyrophosphate	547021	451	88522	85:103.0 86:284.0 87:71.0 89:243.0 90:97.0 91:139.0 95:25.0 96:113.0 97:171.0 101:246.0 102:214.0 103:252.0 104:123.0 105:172.0 106:89.0 107:197.0 109:80.0 112:92.0 115:164.0 119:193.0 121:368.0 122:41.0 123:49.0 131:193.0 133:1471.0 134:81.0 135:873.0 137:377.0 143:40.0 144:90.0 147:1405.0 148:135.0 149:418.0 152:68.0 159:170.0 163:33.0 165:36.0 167:139.0 172:36.0 173:17.0 176:50.0 177:117.0 179…	1023	C00013	XPPKVPWEQAFLFU-UHFFFAOYSA-N	0	0.94	493	109	456	90	60	49	192	273	62	43	31	93	132	53	82	148	50	53	77	74	46	86	57	119	105	83	82	113	180	196	212	145	803	135	34	90	32	20	260	11
putrescine	588119	174	21703	85:624.0 86:17614.0 87:1954.0 88:701.0 95:37.0 96:1.0 97:93.0 98:646.0 99:2310.0 100:8640.0 101:1171.0 102:973.0 103:9.0 110:382.0 111:26.0 112:811.0 113:463.0 114:1772.0 115:664.0 116:1599.0 117:894.0 118:197.0 124:16.0 125:39.0 126:2092.0 127:226.0 128:1088.0 129:243.0 130:4521.0 131:1582.0 132:862.0 140:655.0 141:77.0 142:1872.0 143:265.0 144:500.0 145:66.0 146:2422.0 153:32.0 156:175.0 158:65…	1045	C00138	KIDHWZJUCRJVML-UHFFFAOYSA-N	1	0.84	892082	2371110	2454291	2854895	3331360	5388795	2227328	2625991	3486659	3013144	3670434	1930630	2439875	347541	5005270	2935556	4073783	6150288	4436446	3152616	4414633	3705050	3500489	3254618	3981028	3201146	1335303	3397630	2301741	2261016	507994	2239003	896780	1893499	3877271	4291903	198189	3316672	1586967	4763719
pseudo uridine	813899	217	1688	86:237.0 88:11.0 89:59.0 98:89.0 99:253.0 100:1259.0 101:467.0 102:246.0 103:1528.0 104:31.0 105:44.0 106:207.0 107:166.0 109:7.0 110:112.0 111:375.0 113:146.0 114:80.0 115:64.0 116:328.0 117:474.0 118:55.0 122:3.0 124:1.0 125:164.0 127:342.0 128:214.0 129:1201.0 130:286.0 131:481.0 132:107.0 133:1244.0 134:252.0 136:17.0 137:5.0 140:118.0 141:89.0 142:644.0 143:887.0 144:172.0 145:62.0 147:4539.…	15047	C02067	PTJWIQPHWPFNBW-GBNDHIKLSA-N	0.48	1	2508	667	1712	3225	5113	745	4259	5810	2195	3331	1497	1564	2725	2352	1704	2148	2249	565	1638	3158	4131	3667	1919	3436	2419	4045	669	4265	6907	5561	5223	4022	21338	921	818	1054	1866	2204	2510	3282
proline	364523	142	171970	85:1055.0 86:1908.0 87:916.0 88:634.0 95:165.0 96:356.0 97:345.0 99:1005.0 100:3118.0 101:1393.0 103:251.0 106:185.0 107:211.0 108:134.0 113:1037.0 114:294.0 115:1417.0 118:96.0 121:64.0 126:275.0 128:58.0 131:365.0 133:1875.0 140:1177.0 142:96461.0 143:13706.0 144:4081.0 145:234.0 147:1734.0 148:505.0 155:204.0 170:1119.0 174:120.0 175:34.0 176:111.0 181:141.0 184:74.0 196:36.0 204:70.0 215:33.0…	145742	C00148	ONIBWKKTOPOVIA-BYPYZUCNSA-N	0.96	1	11797	31691	28170	12839	20589	17682	29100	19616	22473	108012	10878	92766	33137	30858	70288	13567	36090	9622	20195	10809	13264	18608	8285	48129	27264	12590	55144	22275	41190	10114	3219	3895	6375	17377	25069	24861	65428	27532	7590	18333
piperidone	275603	156	34023	85:313.0 86:2133.0 87:100.0 89:10.0 91:1.0 92:54.0 93:54.0 94:68.0 95:129.0 97:4.0 98:339.0 99:78.0 100:2441.0 101:229.0 102:141.0 103:160.0 104:41.0 105:172.0 106:216.0 107:648.0 109:93.0 110:545.0 111:5.0 112:96.0 113:22.0 114:137.0 115:193.0 116:188.0 117:101.0 118:56.0 119:47.0 122:30.0 126:693.0 127:556.0 128:915.0 129:179.0 130:428.0 131:73.0 133:135.0 134:199.0 135:185.0 136:25.0 137:5.0 1…	12665		XUWHAWMETYGRKB-UHFFFAOYSA-N	0.66	0	47711	79430	150118	64756	20947	64304	85783	51186	49470	159481	23300	251303	164208	10675	306918	27377	178751	41533	36526	31463	54204	21470	24838	112703	104137	62960	47336	80273	129086	53716	59547	24129	37196	38815	187201	104368	1386	12224	37972	123465
pipecolinic acid	404121	156	2448	85:187.0 88:116.0 99:41.0 100:66.0 101:16.0 103:96.0 109:24.0 110:3.0 113:34.0 114:48.0 116:62.0 117:22.0 126:6.0 127:56.0 128:38.0 130:33.0 134:136.0 147:48.0 151:152.0 152:36.0 156:4170.0 157:475.0 158:163.0 168:30.0 171:57.0 181:23.0 184:125.0 186:10.0 193:50.0 216:8.0 227:24.0 230:88.0 231:22.0 299:135.0 300:78.0 304:20.0 318:8.0 363:26.0 391:1.0 400:3.0 407:6.0 410:5.0 435:5.0 467:3.0 487:21…	6931662		HXEACLLIILLPRG-RXMQYKEDSA-N	0.58	0.64	17416	15039	25580	11051	3272	32324	33493	12031	12760	37810	7351	39429	50983	2684	42680	22257	37333	8882	8051	8783	20502	8825	6407	42272	34430	15214	24572	43433	55222	15772	8214	4121	8265	11416	19232	17642	2185	4323	33846	37744
pimelic acid	523205	155	33429	85:401.0 86:767.0 87:6.0 88:84.0 93:6.0 95:185.0 96:65.0 97:1110.0 98:147.0 99:197.0 100:40.0 101:333.0 102:57.0 103:160.0 104:5.0 105:28.0 107:362.0 108:52.0 110:38.0 111:119.0 112:3.0 113:401.0 115:115.0 116:422.0 117:2566.0 118:134.0 119:71.0 122:1.0 124:204.0 125:2198.0 127:220.0 128:25.0 129:1610.0 130:615.0 131:483.0 133:564.0 134:57.0 135:84.0 137:56.0 138:18.0 139:8.0 140:14.0 141:43.0 14…	385	C02656	WLJVNTCWHIRURA-UHFFFAOYSA-N	0.72	0.2	4691	3027	3896	3348	750	1650	3413	2924	2920	1239	1881	1279	4185	2375	2720	2125	1694	2237	2683	2430	2648	2437	1189	2762	3367	2600	3921	3328	3421	4437	3061	1666	4398	4113	1472	3380	1732	1024	4163	2102
phytosphingosine	910976	204	171211	87:397.0 88:730.0 89:874.0 91:987.0 93:161.0 95:1050.0 97:1193.0 99:275.0 100:3999.0 101:1245.0 102:1696.0 103:3879.0 105:282.0 111:438.0 112:150.0 113:235.0 114:896.0 115:1398.0 116:3696.0 117:1599.0 118:356.0 119:207.0 125:134.0 128:638.0 129:3267.0 130:924.0 131:861.0 132:1790.0 133:1790.0 134:209.0 141:40.0 143:599.0 145:207.0 147:6661.0 148:959.0 149:421.0 154:115.0 159:114.0 165:157.0 171:5…	122121	C12144	AERBNCYCJBRYDG-KSZLIROESA-N	0.75	0	5860	22399	2692	11651	45619	8758	8092	2739	6340	7257	5391	18678	5376	3438	5396	2941	6670	8896	9556	3341	30498	3020	2989	5695	5578	15003	12296	2162	17319	7639	16795	7058	3742	13305	3514	81025	1744	861	6242	5219
phthalic acid	567345	147	46142	85:1488.0 86:188.0 87:617.0 88:207.0 89:2382.0 90:1115.0 91:3962.0 92:168.0 93:1678.0 94:146.0 95:203.0 96:81.0 97:59.0 99:223.0 100:235.0 101:559.0 102:405.0 103:2021.0 104:2900.0 105:3735.0 106:343.0 107:433.0 109:43.0 110:114.0 112:86.0 113:102.0 114:58.0 115:1691.0 116:305.0 117:184.0 118:551.0 119:5043.0 120:785.0 121:597.0 122:83.0 123:50.0 124:7.0 126:880.0 127:441.0 128:199.0 129:554.0 13…	1017	C01606	XNGIFLGASWRNHJ-UHFFFAOYSA-N	0.16	0.04	12919	10917	16743	12233	6651	7837	10269	11003	6329	5814	5711	2087	8800	9067	6811	6397	5252	10346	7743	13969	20629	8511	5001	2024	6304	5688	8606	14529	13991	26684	16300	8522	21577	11197	1218	12831	9143	14397	18366	7585
phosphoethanolamine	603912	299	1723	85:20.0 86:924.0 87:173.0 88:41.0 90:8.0 91:76.0 95:36.0 96:1.0 97:39.0 99:9.0 100:4477.0 101:327.0 102:26.0 107:64.0 109:53.0 113:35.0 114:2019.0 115:1275.0 116:271.0 117:260.0 119:44.0 120:5.0 123:18.0 129:2.0 130:467.0 131:202.0 132:82.0 133:763.0 134:65.0 135:351.0 136:14.0 137:122.0 140:1.0 143:21.0 144:14.0 146:1.0 147:618.0 148:30.0 151:53.0 158:77.0 160:1.0 161:3.0 162:9.0 163:5.0 164:2.0…	1015	C00346	SUHOOTKUPISOBE-UHFFFAOYSA-N	0.04	0.64	508	711	376	387	504	530	405	547	503	483	338	393	459	441	238	411	158	485	1190	543	566	662	299	546	639	530	225	915	1465	653	446	617	729	323	281	632	221	117	822	550
phosphate	348274	314	34092	85:21470.0 86:739.0 87:25996.0 88:12812.0 89:30708.0 90:8818.0 91:18646.0 92:3578.0 93:4459.0 94:1276.0 95:2003.0 96:5008.0 97:1907.0 98:4346.0 99:7599.0 101:663.0 102:1041.0 103:94171.0 104:21169.0 105:59291.0 106:9882.0 107:27201.0 108:3143.0 109:8424.0 112:1438.0 113:1951.0 115:119007.0 116:21156.0 117:61050.0 118:12929.0 119:88455.0 120:15540.0 121:64232.0 122:8493.0 123:26913.0 124:2838.0 12…	1004	C00009	NBIIXXVUZAFLBC-UHFFFAOYSA-N	0.95	0.88	7594	34145	10072	8553	5260	17459	7135	7422	10251	12071	10855	25587	14436	17298	15989	7834	11110	27505	25265	7786	7336	10370	4162	8234	9201	21476	36462	12424	3571	13858	10191	7111	7985	27522	10227	12238	4598	91	19714	9102
phenylethylamine	513300	174	16890	86:5896.0 87:600.0 88:548.0 90:188.0 91:2636.0 92:206.0 93:1.0 97:1.0 98:48.0 99:129.0 100:2765.0 101:192.0 102:109.0 103:2633.0 104:279.0 107:378.0 108:74.0 110:55.0 113:65.0 114:106.0 116:481.0 121:196.0 122:31.0 124:2.0 127:165.0 128:135.0 129:158.0 130:745.0 134:29.0 135:9.0 139:10.0 143:120.0 144:297.0 146:47.0 155:163.0 158:53.0 160:164.0 161:9.0 162:213.0 172:80.0 174:6708.0 175:987.0 176:…	1001	C05332	BHHGXPLMPWCGHP-UHFFFAOYSA-N	0.92	0.74	29346	19786	15964	21984	55000	12010	47405	60775	46307	32697	31123	13704	35856	2703	23601	37921	92858	64982	15313	26743	77612	41107	60004	19656	45077	44251	4357	26520	17264	41316	5074	37542	43294	22427	84701	21027	725	11795	36056	76599
phenylalanine	537804	192	33	85:116.0 86:960.0 87:386.0 88:130.0 89:524.0 90:333.0 91:7394.0 92:957.0 93:245.0 95:80.0 97:48.0 98:130.0 99:52.0 100:9746.0 101:1177.0 102:805.0 103:1034.0 104:243.0 105:388.0 107:71.0 113:39.0 114:39.0 115:219.0 116:165.0 117:780.0 118:464.0 119:424.0 120:416.0 121:430.0 122:59.0 123:39.0 129:97.0 130:1679.0 131:1133.0 132:1341.0 133:1146.0 134:336.0 135:293.0 136:49.0 138:34.0 139:49.0 140:25…	6140	C00079	COLNVLDHVKWLRT-QMMMGPOBSA-N	1	1	123995	99190	71989	124099	155345	28933	112788	166670	221176	123352	207830	63154	140976	278079	33486	107202	193411	144017	108507	144310	174622	137238	91653	49342	154970	174429	33692	86160	102769	153734	92068	140331	119996	110069	211683	50763	304227	179897	128658	199858
phenylacetic acid	368081	164	1733	85:15.0 86:1825.0 87:567.0 88:240.0 89:6578.0 90:5347.0 91:20552.0 92:1827.0 93:126.0 94:19.0 95:266.0 97:74.0 100:1526.0 101:518.0 102:229.0 103:171.0 105:671.0 106:137.0 108:56.0 112:135.0 116:127.0 117:4352.0 118:2311.0 119:769.0 120:88.0 121:1111.0 122:24.0 123:38.0 124:38.0 130:280.0 131:53.0 132:343.0 133:940.0 135:497.0 136:21.0 137:6176.0 138:606.0 139:203.0 140:14.0 144:86.0 146:76.0 148…	999	C07086	WLJVXDMOQOGPHL-UHFFFAOYSA-N	0.65	0.01	1240	66833	11250	15915	3751	95737	10895	7211	14337	47918	43294	122334	11532	79769	49640	12378	24510	74136	54167	5425	3103	13419	7175	7743	20920	40136	153116	10420	15272	10965	9520	6217	50808	138585	50410	145202	6267	8262	30695	38614
pentitol	563801	307	3469	88:123.0 89:928.0 90:108.0 98:69.0 99:137.0 100:7.0 101:8.0 102:154.0 103:5399.0 104:501.0 105:177.0 111:32.0 113:1.0 115:213.0 116:137.0 117:1282.0 118:98.0 119:45.0 120:2.0 123:3.0 127:233.0 130:1217.0 131:731.0 132:207.0 133:669.0 134:177.0 135:78.0 136:8.0 141:13.0 142:18.0 143:369.0 146:76.0 147:4380.0 148:590.0 149:104.0 150:28.0 151:35.0 157:1254.0 158:93.0 159:28.0 161:15.0 163:15.0 168:3…	827	D00061	HEBKCHPVOIAQTA-UHFFFAOYSA-N	0.35	0	3092	154	2371	909	1188	172	2990	178	770	478	1951	386	3335	62	1509	264	223	115	163	1790	260	447	1358	1215	1058	668	1297	2577	2476	2868	1884	1978	4202	585	759	286	80	162	3134	300
pentadecanoic acid	674647	117	1680	85:1079.0 86:936.0 87:668.0 88:311.0 89:1235.0 90:252.0 91:363.0 92:121.0 93:924.0 94:23.0 95:2663.0 96:207.0 97:1950.0 98:1682.0 99:1097.0 100:375.0 101:739.0 102:111.0 103:398.0 105:1755.0 106:21.0 107:560.0 109:714.0 110:435.0 111:832.0 112:533.0 113:210.0 114:84.0 115:386.0 116:3014.0 117:51588.0 118:5064.0 119:2265.0 120:57.0 121:350.0 122:9.0 123:205.0 124:23.0 125:265.0 126:192.0 127:184.0…	13849	C16537	WQEPLUUGTLDZJY-UHFFFAOYSA-N	0.56	0	31369	32104	15576	12035	30123	27996	14428	17925	31211	24579	15325	24700	24249	22502	20446	17255	19496	26385	31819	31432	38108	33007	11566	24276	27364	33120	31043	34758	28018	29450	21517	20462	19123	33546	10213	27685	55719	20884	21485	44467
parabanic acid	464991	100	4944	86:184.0 100:2598.0 101:191.0 102:43.0 107:53.0 110:113.0 132:10.0 180:10.0 184:81.0 185:1.0 215:53.0 216:3.0 243:231.0 258:5.0 312:3.0 349:7.0 360:7.0 402:7.0 409:10.0 429:9.0 433:1.0 447:3.0 480:21.0 483:7.0 496:10.0	67126	C00802	ZFLIKDUSUDBGCD-UHFFFAOYSA-N	0.16	0	2980	3684	2951	3397	1803	2496	1657	2856	1339	4096	503	1609	3535	3720	3486	603	1198	2419	1559	2371	2916	835	358	4527	2865	1236	1518	2097	5401	1392	5244	1455	6418	1584	986	4100	2208	671	2286	3957
pantothenic acid	690887	201	31356	86:142.0 87:115.0 88:61.0 89:123.0 91:147.0 93:29.0 97:25.0 98:459.0 100:211.0 101:202.0 102:407.0 103:6738.0 104:460.0 105:272.0 106:32.0 114:19.0 115:305.0 116:236.0 117:4122.0 118:351.0 119:205.0 120:33.0 121:29.0 122:19.0 124:194.0 128:128.0 129:1113.0 130:360.0 131:394.0 132:39.0 133:428.0 134:46.0 135:88.0 143:489.0 144:621.0 145:402.0 146:236.0 147:1702.0 148:191.0 149:222.0 156:34.0 157:2…	6613	C12276	GHOKWGTUZJEAQD-ZETCQYMHSA-N	0.75	0.15	93288	1429	61206	57655	45978	74471	88560	54647	88749	8983	666	2080	85886	6591	33926	40041	21631	8251	6785	28466	26337	29405	38206	44814	93760	18639	1833	100101	96737	62786	53757	44695	99793	3493	8791	3581	1096	933	105850	72263
panose	1187262	204	363862	89:5907.0 97:1579.0 100:1739.0 101:3018.0 102:1310.0 103:39216.0 104:3218.0 105:2159.0 109:1802.0 113:625.0 115:1053.0 116:1699.0 117:15172.0 118:1407.0 119:1562.0 129:22227.0 130:3082.0 131:3148.0 133:7918.0 134:513.0 142:1141.0 143:3580.0 144:805.0 145:595.0 146:168.0 147:32110.0 148:5609.0 149:3933.0 153:688.0 155:3128.0 157:4926.0 158:839.0 159:1031.0 160:6336.0 161:1182.0 163:1566.0 169:1856…	94448		ZCLAHGAZPPEVDX-MQHGYYCBSA-N	0.18	0	610	2553	388	154	199	908	182	538	101	110	2792	350	576	731	258	1061	66	168	112	179	185	120	135	110	193	172	311	146	127	152	189	160	1168	260	151	1437	8067	251	1128	205
palmitoleic acid	704511	311	31379	85:95.0 86:95.0 89:132.0 91:227.0 92:75.0 93:348.0 94:171.0 95:893.0 96:1339.0 97:784.0 98:663.0 99:107.0 101:129.0 103:146.0 105:89.0 107:131.0 109:362.0 110:406.0 111:217.0 112:50.0 115:92.0 116:450.0 117:7088.0 118:479.0 119:360.0 120:51.0 121:116.0 122:41.0 123:218.0 124:151.0 126:42.0 129:2986.0 130:332.0 131:398.0 132:473.0 133:198.0 134:90.0 137:123.0 138:51.0 143:53.0 145:807.0 146:119.0 …	445638	C08362	SECPZKHBENQXJG-FPLPWBNLSA-N	0.81	0.99	8984	5774	4148	4141	3972	6242	2702	2925	6684	13596	4540	2224	34048	4866	4962	3578	2618	13651	11882	5696	3678	22147	1885	3732	4503	9401	18994	3909	9822	5061	2206	3535	1611	9439	3170	4457	196	128	6726	5601
oxoproline	485935	156	10	85:3305.0 86:3646.0 88:224.0 89:349.0 92:90.0 93:31.0 94:268.0 97:300.0 98:1005.0 99:1224.0 100:2213.0 101:88.0 102:773.0 103:769.0 104:198.0 105:507.0 106:72.0 108:279.0 109:95.0 110:674.0 111:220.0 112:3321.0 113:1081.0 114:1752.0 115:792.0 116:101.0 117:1281.0 118:207.0 119:332.0 122:383.0 123:65.0 124:48.0 126:536.0 127:49.0 128:356.0 129:115.0 130:114.0 131:2158.0 132:618.0 133:4526.0 134:75…	7405	C01879	ODHCTXKNWHHXJC-VKHMYHEASA-N	0.99	0.99	170027	558735	188343	460142	287162	254069	171003	95292	270652	380600	208450	276784	154089	712374	166831	140973	254196	222239	325292	240012	133333	196094	89467	177836	372895	207473	458001	135945	210399	146161	86346	105246	172399	458170	555093	358785	640999	134574	109315	128784
ornithine	527113	142	1821	85:252.0 86:569.0 87:548.0 88:467.0 89:1118.0 90:393.0 94:104.0 95:111.0 96:181.0 97:341.0 98:542.0 99:225.0 100:4351.0 101:232.0 102:4646.0 103:662.0 104:345.0 105:178.0 106:63.0 107:181.0 108:4.0 109:6.0 110:358.0 111:16.0 112:222.0 113:200.0 114:874.0 115:3565.0 116:287.0 117:1730.0 118:380.0 119:233.0 124:193.0 125:16.0 126:683.0 128:2450.0 129:1396.0 130:1712.0 131:801.0 132:778.0 133:1042.0…	6262	C00077	AHLPHDHHMVZTML-BYPYZUCNSA-N	0.84	0.99	63708	113774	49512	77399	22923	98215	35016	18166	63348	80107	35453	138669	28548	109015	94049	2909822	53784	136618	80894	56387	23257	33638	3502315	38729	140422	46031	123624	33383	67950	19657	51690	2204258	190736	175269	89679	74819	212446	163739	1625728	47368
oleic acid	778746	339	209167	85:3872.0 86:566.0 87:1241.0 88:607.0 89:2769.0 90:148.0 91:2232.0 92:922.0 93:6077.0 94:371.0 95:7828.0 96:11170.0 97:5823.0 98:12313.0 99:1884.0 102:485.0 104:128.0 105:3581.0 107:1313.0 108:664.0 109:2748.0 110:4966.0 111:5154.0 112:1729.0 113:601.0 114:168.0 116:3461.0 117:45835.0 118:5820.0 119:3652.0 120:852.0 121:815.0 122:664.0 123:4223.0 124:1676.0 125:925.0 127:589.0 128:263.0 129:41102…	445639	C00712	ZQPPMHVWECSIRJ-KTKRTIGZSA-N	1	1	59698	32516	18581	23506	24390	23238	13803	9171	37861	53003	24200	10672	196745	29396	21104	19864	8809	56773	83299	23836	19621	108788	8870	16553	22039	57714	122612	29472	51882	23945	13224	20329	13244	40785	16556	21283	7242	7482	47650	37024
oleamide	849710	144	20961	85:426.0 86:402.0 87:144.0 89:353.0 90:711.0 91:1369.0 92:194.0 93:400.0 94:235.0 95:556.0 96:526.0 97:627.0 98:214.0 99:199.0 100:1197.0 101:249.0 102:259.0 104:85.0 105:184.0 106:90.0 107:124.0 108:222.0 109:239.0 110:336.0 111:154.0 113:111.0 114:132.0 115:2827.0 116:11090.0 117:1116.0 118:448.0 119:161.0 120:59.0 121:55.0 122:381.0 123:147.0 124:172.0 125:88.0 126:316.0 127:230.0 128:10813.0 …	5283387	C19670	FATBGEAMYMYZAF-KTKRTIGZSA-N	0.13	0	1338	1709	1225	1275	575	1287	821	599	1157	1189	888	689	607	2000	1263	377	594	664	1530	568	507	1372	462	887	922	1916	4016	596	746	635	612	451	1290	3221	528	1293	459	441	763	2455
octadecylglycerol	928878	205	104598	85:1831.0 86:134.0 87:138.0 88:115.0 89:743.0 90:83.0 91:171.0 92:39.0 93:52.0 95:256.0 96:162.0 97:977.0 98:173.0 99:522.0 101:1457.0 102:162.0 103:3138.0 104:204.0 105:391.0 106:54.0 107:36.0 108:56.0 109:132.0 110:53.0 111:262.0 112:70.0 113:205.0 115:569.0 116:1378.0 117:8624.0 118:625.0 119:566.0 120:50.0 125:110.0 126:47.0 127:111.0 129:1655.0 130:3660.0 131:3655.0 132:694.0 133:5745.0 134:…	3681	C13858	OGBUMNBNEWYMNJ-UHFFFAOYSA-N	0.77	0	4152	22423	3172	9132	13007	4577	4545	4155	5093	8676	395	13099	6344	11691	2895	5748	14605	8763	7134	9272	13339	7996	2698	5668	9759	19153	19530	3308	5966	3736	2884	3547	5378	10816	6464	22645	4003	4821	575	16049
octadecanol	755409	327	997	85:3812.0 86:224.0 87:853.0 88:401.0 89:7207.0 90:593.0 91:2611.0 92:281.0 93:206.0 94:57.0 95:784.0 96:291.0 97:9121.0 98:859.0 99:2097.0 100:378.0 101:3627.0 102:510.0 103:8469.0 104:862.0 105:36.0 109:308.0 110:74.0 111:3878.0 112:352.0 113:980.0 115:1693.0 116:209.0 121:32.0 123:60.0 124:45.0 125:1173.0 126:164.0 127:120.0 129:1075.0 137:28.0 139:257.0 140:47.0 141:118.0 143:377.0 144:41.0 14…	8221		GLDOVTGHNKAZLK-UHFFFAOYSA-N	0.52	0.79	1063	1831	940	1085	383	816	904	558	750	844	726	1203	1215	954	1048	661	502	1170	1113	1215	782	797	422	1131	164	911	747	1068	955	1042	861	719	1126	1580	503	1530	459	663	1441	1067
O-acetylserine	414914	174	3943	85:50.0 88:106.0 89:497.0 90:71.0 91:67.0 92:42.0 93:18.0 95:6.0 100:1115.0 101:583.0 102:369.0 103:258.0 104:89.0 107:294.0 108:42.0 110:29.0 111:25.0 112:39.0 114:153.0 115:82.0 116:2248.0 117:605.0 118:166.0 127:20.0 128:35.0 129:92.0 130:222.0 131:1052.0 132:2219.0 133:371.0 134:647.0 136:37.0 143:114.0 144:320.0 146:17.0 147:692.0 149:416.0 153:1.0 158:108.0 160:21.0 167:25.0 172:25.0 174:33…	99478	C00979	VZXPDPZARILFQX-BYPYZUCNSA-N	0.39	0	3094	1384	2549	6245	4909	2515	1740	7780	6830	651	7792	7216	7881	612	5315	6018	4103	2183	3031	12002	12066	5260	7148	5740	10582	10136	2269	10326	7635	13232	16427	8468	1526	2695	10885	3510	298	819	2440	8105
norvaline	326715	144	84561	85:491.0 86:620.0 87:1347.0 88:555.0 89:270.0 90:21.0 91:629.0 92:203.0 94:223.0 95:100.0 96:202.0 97:198.0 98:556.0 99:281.0 100:3028.0 101:791.0 102:238.0 103:1321.0 104:271.0 105:585.0 106:336.0 111:561.0 112:234.0 114:1043.0 115:530.0 116:354.0 117:891.0 118:228.0 120:19.0 122:111.0 123:119.0 125:135.0 128:1045.0 129:421.0 130:833.0 131:1324.0 132:477.0 133:1391.0 135:525.0 139:158.0 140:84.0…	65098	C01826	SNDPXSYFESPGGJ-BYPYZUCNSA-N	0.18	0.03	10014	3016	35486	7975	5387	2886	17230	10053	30254	29789	36192	35362	75982	1553	9727	58951	6234	1211	12523	13420	26370	3265	16027	10830	4229	7288	11904	10851	3351	13007	10096	6723	52950	3120	58948	2161	41172	4154	92062	2323
nonadecanoic acid	822782	117	46258	85:1502.0 89:30.0 101:20.0 117:3559.0 118:308.0 129:1734.0 130:140.0 131:491.0 132:1487.0 134:55.0 135:25.0 145:565.0 146:4.0 150:7.0 159:47.0 173:18.0 185:102.0 187:34.0 201:139.0 213:2.0 241:13.0 246:10.0 283:25.0 285:5.0 313:22.0 327:21.0 328:30.0 339:2.0 341:7.0 346:3.0 354:7.0 355:315.0 356:200.0 357:42.0 358:14.0 364:1.0 403:4.0 428:8.0 484:8.0	12591	C16535	ISYWECDDZWTKFF-UHFFFAOYSA-N	0.09	0.39	4793	2915	17683	2484	1739	2237	2778	2400	1809	1688	1936	2123	2898	2638	3357	3483	1163	2516	3911	2302	2222	2009	1781	2033	3684	3921	2569	2724	5548	3959	3681	2102	7540	3710	1438	3391	1364	1104	9901	2201
nicotinic acid	366992	180	285	85:402.0 86:47.0 87:81.0 90:191.0 91:76.0 94:43.0 99:36.0 100:31.0 103:50.0 105:288.0 106:4046.0 107:327.0 109:67.0 110:145.0 118:33.0 122:66.0 123:45.0 126:72.0 129:143.0 134:280.0 135:48.0 136:4959.0 137:603.0 138:162.0 139:22.0 153:17.0 156:104.0 158:16.0 160:19.0 165:17.0 166:29.0 167:25.0 171:18.0 175:13.0 179:34.0 180:4823.0 181:551.0 182:132.0 184:156.0 195:164.0 196:32.0 198:40.0 200:20.0…	938	C00253	PVNIIMVLHYAWGP-UHFFFAOYSA-N	0.7	0.05	106346	72747	80885	107494	83423	91216	140604	94443	97426	96564	78956	58771	132772	92694	190918	80178	112638	49362	110541	76228	85869	138571	58752	124343	148523	81829	60287	108134	118311	107858	84751	74698	125521	57720	82817	54641	2676	8937	72980	94585
nicotinamide	471602	179	84542	86:209.0 89:162.0 90:198.0 92:127.0 93:263.0 94:195.0 100:836.0 102:136.0 103:220.0 104:2595.0 105:4174.0 106:810.0 108:61.0 119:174.0 120:170.0 122:157.0 123:39.0 135:126.0 136:6136.0 137:808.0 138:240.0 139:45.0 148:164.0 150:54.0 151:55.0 161:87.0 163:218.0 164:32.0 165:80.0 166:33.0 175:86.0 178:33.0 179:15388.0 180:2109.0 181:675.0 182:48.0 193:1190.0 194:529.0 195:117.0	936	C00153	DFPAKSUCGFBDDF-UHFFFAOYSA-N	0.15	0.13	4487	1716	1871	3874	1716	1563	4375	1407	1588	2128	1199	2617	1826	2070	1753	1528	2243	3359	852	3323	5384	2693	2494	2601	2514	4351	2263	2576	3411	2255	1768	1100	2819	2693	2667	2154	554	2413	2117	6380
N-acetylputrescine	595523	174	87301	85:3862.0 86:56152.0 87:6678.0 88:3311.0 89:518.0 90:72.0 93:1.0 94:49.0 95:146.0 96:2586.0 97:481.0 98:2104.0 99:2411.0 100:32618.0 101:5452.0 102:5394.0 103:1640.0 104:582.0 105:212.0 109:26.0 110:423.0 111:415.0 112:6397.0 113:2161.0 114:2504.0 115:2578.0 116:5494.0 117:3889.0 118:1034.0 119:497.0 120:23.0 122:1872.0 123:114.0 124:123.0 125:23.0 126:826.0 127:360.0 128:3154.0 129:1963.0 130:96…	122356	C02714	KLZGKIDSEJWEDW-UHFFFAOYSA-N	0.61	0.01	15784	59125	8070	20913	5313	50374	4072	4143	25116	15898	17474	33064	4718	15843	43293	5302	88931	102183	77383	11189	32132	21649	14359	13261	5992	21343	32458	5593	4067	3407	8258	3241	52497	31211	22895	65593	32808	18903	17713	16515
N-acetylornithine	694651	174	19188	85:29.0 86:114.0 97:39.0 100:114.0 116:34.0 142:63.0 174:720.0 175:119.0 176:31.0	439232	C00437	JRLGPAXAGHMNOL-LURJTMIESA-N	0.56	0	6466	6606	3771	4983	2676	4900	8563	3427	5009	4470	3026	6795	4818	3325	4023	2773	4847	3493	7718	5270	3327	4723	2405	4111	5235	3061	2866	3904	7263	5636	3471	2263	13706	5623	2794	6205	715	668	4193	5192
N-acetylneuraminic acid	913814	246	31556	87:2.0 88:19.0 89:1300.0 90:56.0 91:7.0 93:21.0 94:23.0 95:42.0 96:295.0 98:116.0 99:213.0 100:234.0 101:531.0 102:111.0 103:2211.0 104:276.0 105:35.0 106:63.0 107:79.0 111:31.0 112:119.0 113:26.0 114:304.0 115:184.0 116:1308.0 117:1566.0 118:184.0 119:106.0 121:35.0 122:115.0 123:113.0 124:32.0 125:26.0 126:253.0 128:489.0 129:735.0 130:200.0 131:808.0 132:513.0 133:1833.0 134:323.0 135:253.0 13…	439197	C00270	SQVRNKJHWKZAKO-LUWBGTNYSA-N	0.25	0.11	2247	3285	1382	875	4277	1141	1448	1672	1308	617	2947	3586	1587	4284	1484	3587	350	906	1727	1810	2197	1775	2192	2050	2254	974	620	1229	1784	3435	1728	651	1878	198	682	3213	679	131	3775	913
N-acetylmannosamine	723255	202	110343	85:627.0 86:261.0 87:21356.0 88:1373.0 89:5326.0 90:130.0 91:161.0 95:237.0 96:68.0 97:1088.0 98:343.0 99:1634.0 100:2143.0 101:1471.0 102:1075.0 103:9375.0 104:938.0 105:1028.0 107:87.0 108:134.0 109:278.0 111:454.0 112:509.0 113:954.0 114:629.0 115:703.0 116:3570.0 117:10573.0 118:1265.0 119:647.0 120:158.0 122:136.0 123:291.0 124:123.0 125:136.0 126:277.0 127:331.0 128:962.0 129:16447.0 130:32…	11096158		OVRNDRQMDRJTHS-OZRXBMAMSA-N	0.94	0	25459	21718	3761	7540	11673	9128	19132	3910	10631	6238	5712	18291	3697	37498	8621	4408	4523	5535	11125	7324	8189	26012	8286	7969	8892	8030	5392	4325	15995	12652	5751	1928	19914	9928	3269	11680	11670	12008	6341	5399
N-acetyl-leucine	440752	86	510387	85:5794.0 86:91215.0 87:7684.0 88:330.0 90:952.0 91:1887.0 93:1173.0 96:1613.0 97:1361.0 99:9380.0 100:4005.0 102:1179.0 103:2349.0 104:2587.0 107:145.0 108:208.0 110:510.0 112:3626.0 113:1221.0 115:1517.0 116:11553.0 117:4826.0 118:934.0 122:108.0 126:529.0 128:35709.0 129:6712.0 130:2845.0 134:145.0 140:559.0 142:2617.0 143:1041.0 144:1107.0 145:2258.0 146:4954.0 152:116.0 155:560.0 156:418.0 1…	70912	C02710	WXNXCEHXYPACJF-ZETCQYMHSA-N	0.04	0.13	3960	3581	3407	3234	2767	3459	3449	3726	4525	2920	3112	153192	4066	3339	3375	3157	2849	2897	3098	3637	4996	3203	2852	5393	4507	3854	4102	4875	7949	4953	2444	2399	3821	136921	4129	4278	1988	1574	5785	3452
N-acetylglutamate	604748	216	62256	85:107814.0 86:18458.0 87:11769.0 88:11138.0 89:14892.0 90:2982.0 91:3720.0 92:524.0 93:740.0 94:486.0 95:6384.0 96:2407.0 97:5303.0 98:35189.0 99:25848.0 100:19887.0 101:23815.0 102:9882.0 103:77075.0 104:9354.0 105:4287.0 106:699.0 107:415.0 108:1738.0 109:1106.0 110:2483.0 111:20118.0 112:15357.0 113:5447.0 114:10062.0 115:11909.0 116:108594.0 117:47576.0 118:12294.0 119:6445.0 120:703.0 121:5…	70914	C00624	RFMMMVDNIPUKGG-YFKPBYRVSA-N	0.32	0	789	5375	854	2889	342	943	640	603	1606	470	334	4148	957	16313	1542	614	2516	2275	5193	4403	579	745	417	1207	4018	648	3005	788	1250	322	349	422	1481	5729	1615	12310	1002	126	1276	659
N-acetyl-D-galactosamine	720730	319	16829	85:5.0 87:21.0 89:522.0 90:3.0 91:16.0 92:2.0 96:5.0 99:15.0 100:381.0 101:81.0 102:1.0 103:551.0 104:46.0 105:18.0 107:5.0 109:4.0 112:43.0 113:156.0 114:271.0 116:297.0 117:1378.0 118:2.0 127:178.0 128:2.0 129:2030.0 130:131.0 131:17.0 133:111.0 135:22.0 136:1.0 137:1.0 139:11.0 141:32.0 142:43.0 143:40.0 145:60.0 147:2330.0 148:379.0 149:5.0 150:1.0 155:89.0 156:73.0 157:1463.0 158:237.0 159:6…	440552	C05021	OVRNDRQMDRJTHS-JAJWTYFOSA-N	0.34	0	1084	8285	946	2394	4076	3099	6809	1183	3964	2530	2265	8009	377	7997	2817	126	2070	2066	4003	2248	3525	190	3051	3422	3828	2879	1013	1203	6716	4552	1690	87	7324	1213	1179	4231	1980	4427	1871	1928
N-acetylaspartic acid	548028	158	4081	85:424.0 86:274.0 87:183.0 88:123.0 93:100.0 94:61.0 95:123.0 98:237.0 99:211.0 100:820.0 101:420.0 102:186.0 103:219.0 104:72.0 107:36.0 109:95.0 110:133.0 111:191.0 112:302.0 113:107.0 114:107.0 115:220.0 116:1962.0 117:4292.0 118:543.0 119:205.0 120:45.0 121:29.0 123:35.0 124:18.0 128:132.0 129:1942.0 130:860.0 131:1103.0 132:1033.0 133:678.0 134:131.0 135:58.0 137:52.0 138:25.0 139:83.0 141:4…	65065	C01042	OTCCIMWXFLJLIA-BYPYZUCNSA-N	0.11	0.03	44301	1434	39158	8413	3754	2773	21085	24096	3228	2634	2659	3501	10483	3576	7053	9628	3750	2302	4048	6096	1650	6576	3464	8684	7315	1673	2265	8461	15721	13269	17273	12118	77998	1275	2545	2019	4352	1395	11353	1816
myristic acid	634414	285	127	85:1672.0 86:922.0 87:259.0 88:617.0 89:2301.0 90:194.0 91:565.0 93:1089.0 94:262.0 95:2947.0 96:479.0 97:1977.0 98:1752.0 99:1650.0 100:382.0 101:1406.0 104:452.0 105:1305.0 106:321.0 107:394.0 108:204.0 109:725.0 110:354.0 111:699.0 112:710.0 116:3547.0 117:55137.0 118:5160.0 119:1775.0 120:155.0 121:314.0 122:68.0 123:74.0 124:132.0 125:204.0 128:186.0 129:23236.0 130:2963.0 131:10163.0 132:11…	11005	C06424	TUNFSRHWOTWDNC-UHFFFAOYSA-N	0.97	0.88	10890	9835	6611	4826	4616	8354	3804	7316	7591	8759	4750	6378	20634	7732	6755	6033	4504	12963	12072	8977	6224	10370	3038	6538	6728	9995	15805	8750	10636	8761	5393	5227	5456	13276	3086	6093	2799	2627	11496	8465
myo-inositol	730022	305	1741	85:113.0 86:491.0 87:31.0 88:19.0 89:298.0 90:43.0 95:6.0 99:170.0 100:411.0 101:320.0 102:164.0 103:3399.0 104:366.0 105:2.0 107:22.0 108:49.0 109:262.0 111:243.0 112:149.0 113:176.0 114:90.0 115:187.0 116:296.0 117:1042.0 118:228.0 119:212.0 121:1.0 123:6.0 124:38.0 125:22.0 126:73.0 127:67.0 128:163.0 129:4240.0 130:611.0 131:1566.0 132:262.0 133:3203.0 134:572.0 135:421.0 136:43.0 138:92.0 13…	892	C00137	CDAISMWEOUEBRE-UHFFFAOYSA-N	0.99	0.96	8068	4817	4282	5360	15931	2721	726	4827	3538	4568	2882	1988	2034	14710	1922	3209	2487	4114	4748	4868	5588	5302	2804	4796	3422	10254	7062	3707	1222	3351	4296	2351	5398	5304	1698	3711	37757	6370	2270	3992
montanic acid	1087377	117	84087	85:565.0 86:54.0 87:44.0 89:121.0 91:64.0 93:90.0 95:616.0 96:181.0 97:819.0 98:542.0 99:172.0 100:8.0 101:22.0 105:185.0 107:24.0 108:28.0 109:212.0 111:357.0 112:73.0 113:12.0 116:368.0 117:8406.0 118:752.0 119:300.0 121:123.0 123:28.0 125:48.0 129:3840.0 130:481.0 131:970.0 132:4101.0 133:1170.0 134:287.0 135:19.0 137:4.0 143:338.0 145:3044.0 146:313.0 148:1.0 154:30.0 157:2.0 159:182.0 160:35…	10470		UTOPWMOLSKOLTQ-UHFFFAOYSA-N	0.38	0	4187	1883	2893	3568	2906	8695	3147	5835	1612	3545	902	3064	6566	4462	6876	3285	1534	4260	2291	4940	2661	4594	1619	3438	2522	3791	2539	2658	3353	2768	6632	3001	1722	5987	2098	1923	2009	1243	3358	1819
mevalonic acid	498785	247	127978	85:5483.0 86:568.0 87:2214.0 88:417.0 89:567.0 95:1473.0 96:170.0 97:695.0 98:37.0 99:1868.0 101:4209.0 102:745.0 103:33613.0 104:3185.0 105:1665.0 109:98.0 111:522.0 112:270.0 113:2296.0 114:334.0 115:16246.0 116:2635.0 117:6276.0 118:603.0 119:1368.0 121:170.0 125:354.0 127:1200.0 128:94.0 129:1684.0 131:4149.0 132:507.0 133:10660.0 134:1361.0 135:1202.0 136:100.0 137:60.0 139:32.0 141:1296.0 1…	439230		KJTLQQUUPVSXIM-ZCFIWIBFSA-N	0.56	0.03	747	260	541	855	1959	343	345	2533	619	220	162	359	456	117	415	282	570	196	122	2789	1010	395	244	538	1177	283	125	292	192	214	144	498	539	303	241	203	190	1157	285	919
methylsuccinic acid	376978	261	344756	89:999.0 91:462.0 94:158.0 98:243.0 99:785.0 103:2186.0 115:1229.0 116:252.0 119:1098.0 120:233.0 123:1099.0 124:191.0 129:975.0 131:3087.0 133:2656.0 134:1007.0 143:2860.0 144:523.0 147:49776.0 148:8231.0 149:4382.0 150:752.0 151:226.0 159:226.0 169:75.0 173:79.0 179:86.0 186:1880.0 187:1020.0 188:259.0 189:2307.0 190:446.0 192:218.0 193:280.0 202:78.0 204:886.0 205:618.0 206:165.0 210:323.0 215…	10349		WXUAQHNMJWJLTG-UHFFFAOYSA-N	0.3	0	4507	945	3324	1983	745	983	3055	2227	1672	1066	1114	1047	3213	976	936	1821	615	870	769	1880	1729	1188	813	2063	1469	1875	761	2564	2195	2317	1607	953	2494	1297	986	1009	855	1267	2340	932
methionine sulfoxide	637588	128	1678	85:111.0 86:364.0 88:603.0 89:480.0 90:1509.0 91:197.0 92:84.0 93:154.0 95:15.0 97:671.0 98:290.0 99:172.0 100:3967.0 101:724.0 102:1925.0 103:992.0 104:302.0 105:398.0 108:181.0 110:1218.0 111:125.0 112:950.0 113:82.0 114:1237.0 115:308.0 116:243.0 117:622.0 118:349.0 119:370.0 120:31.0 126:441.0 127:60.0 128:36136.0 129:5558.0 130:2232.0 131:472.0 132:667.0 133:2030.0 134:1330.0 136:77.0 138:1.…	158980	C02989	QEFRNWWLZKMPFJ-YGVKFDHGSA-N	0.16	0.89	9958	19149	6139	11534	8318	10640	5873	7171	18446	10825	18616	10937	6463	7919	7079	7609	8193	6757	15337	17709	10291	15264	7825	10090	3998	11126	7338	8771	11591	10707	5373	4541	12890	9059	8349	11540	11622	2578	8098	8644
methionine sulfone	626468	128	1801	87:193.0 90:33.0 91:5.0 93:27.0 97:23.0 98:44.0 99:135.0 100:561.0 102:243.0 103:81.0 105:123.0 106:7.0 107:24.0 109:8.0 110:62.0 112:135.0 114:336.0 115:47.0 117:114.0 121:42.0 122:25.0 123:29.0 124:17.0 126:118.0 128:9815.0 129:1441.0 130:726.0 131:69.0 132:103.0 133:2.0 134:16.0 136:49.0 137:347.0 138:53.0 139:125.0 141:48.0 142:109.0 146:19.0 147:250.0 149:71.0 152:27.0 155:27.0 162:10.0 166:…	445282		UCUNFLYVYCGDHP-BYPYZUCNSA-N	0	0.65	2678	20897	4369	1781	277	631	1388	2172	306	812	240	22219	574	867	583	362	766	755	637	1080	358	994	286	586	625	2718	648	417	1181	551	549	296	590	7401	488	16217	261	295	745	904
methionine	483560	176	45	86:209.0 87:157.0 88:89.0 92:28.0 96:49.0 98:179.0 100:943.0 101:113.0 102:175.0 103:199.0 104:109.0 105:441.0 107:31.0 114:409.0 115:107.0 117:136.0 118:21.0 122:14.0 128:6524.0 129:603.0 130:496.0 131:1184.0 132:354.0 134:118.0 144:59.0 145:49.0 146:97.0 147:486.0 148:243.0 149:200.0 151:51.0 159:53.0 160:202.0 161:47.0 162:43.0 163:30.0 164:16.0 172:30.0 174:90.0 175:14.0 176:5168.0 177:722.0 …	6137	C00073	FFEARJCKVFRZRR-BYPYZUCNSA-N	0.99	1	26960	25884	19464	31319	31749	12363	24651	22655	49202	32589	29787	15935	19503	106486	19642	18923	23438	9141	31891	18831	19437	33703	7848	18501	31037	16971	21665	21261	41136	19780	11343	11649	46605	13515	32533	23571	74430	49140	18843	16134
methanolphosphate	289520	241	5393	91:189.0 98:118.0 99:213.0 109:13.0 110:42.0 115:116.0 117:125.0 118:94.0 119:81.0 121:107.0 122:6.0 123:105.0 130:13.0 133:646.0 134:53.0 135:408.0 136:125.0 137:176.0 143:34.0 144:4.0 151:78.0 158:18.0 160:2.0 163:856.0 164:67.0 165:58.0 167:92.0 168:16.0 181:147.0 184:128.0 195:233.0 198:4.0 210:1.0 211:438.0 212:72.0 213:19.0 225:3.0 228:46.0 239:1.0 241:2338.0 242:433.0 243:249.0 244:9.0 256…	13130		CAAULPUQFIIOTL-UHFFFAOYSA-N	0	0.85	110	135	78	38	43	167	95	86	118	237	42	206	105	100	107	55	58	153	125	63	40	52	68	87	76	61	127	74	78	114	78	65	114	90	46	172	153	521	236	383
melezitose	1146704	361	16664	85:2882.0 86:356.0 87:1453.0 88:717.0 89:2493.0 90:260.0 94:146.0 95:522.0 96:449.0 97:1475.0 98:147.0 99:1815.0 100:130.0 101:4813.0 102:1108.0 103:59199.0 104:5259.0 105:2332.0 106:118.0 108:29.0 109:3609.0 110:126.0 111:1525.0 112:231.0 113:2422.0 114:582.0 115:2067.0 116:2464.0 117:12895.0 118:1303.0 119:1375.0 120:19.0 121:68.0 123:27.0 125:469.0 126:29.0 127:1837.0 128:405.0 129:57490.0 130…	92817	C08243	QWIZNVHXZXRPDR-WSCXOGSTSA-N	0.14	0	133	137	616	113	53	121	95	467	265	349	450	201	249	43	178	211	40	119	85	334	53	77	34	143	593	111	276	301	179	110	176	173	1298	244	210	142	7975	2709	460	48
mannose	643848	205	390222	85:1023.0 86:1367.0 87:1412.0 88:910.0 89:9966.0 90:944.0 91:1078.0 92:80.0 97:270.0 98:228.0 99:839.0 100:2042.0 101:3813.0 102:1799.0 103:22002.0 104:1959.0 105:5629.0 106:414.0 107:186.0 108:168.0 109:122.0 110:144.0 111:410.0 112:227.0 113:903.0 114:2051.0 115:1515.0 116:1545.0 117:17141.0 118:1619.0 119:1737.0 120:239.0 121:354.0 122:100.0 123:59.0 124:68.0 125:140.0 126:275.0 127:393.0 128:…	18950	C00159	WQZGKKKJIJFFOK-QTVWNMPRSA-N	0.73	0.99	33527	12147	4992	6296	2793	37657	15913	1253	2115	3040	2868	9049	1801	17718	9619	3083	1249	4590	10980	37663	2254	11790	5698	35886	1350	3828	4768	5328	13083	3897	3604	1580	4971	7921	702	9053	20322	18499	4115	19394
maltotriose	1176044	361	84521	85:2289.0 86:1107.0 87:1856.0 88:1048.0 89:11031.0 90:1060.0 91:652.0 92:201.0 93:121.0 94:240.0 95:525.0 96:664.0 97:2907.0 98:443.0 99:1934.0 100:3182.0 101:6896.0 102:3193.0 103:45196.0 104:4117.0 105:5028.0 106:356.0 107:488.0 108:225.0 109:2412.0 110:402.0 111:1693.0 112:454.0 113:1828.0 114:1470.0 115:2305.0 116:3828.0 117:26968.0 118:2734.0 119:2261.0 120:199.0 121:186.0 122:101.0 123:327.…	439586	C01835	FYGDTMLNYKFZSV-DZOUCCHMSA-N	0.37	0	306	186	137	136	33	1498	300	110	213	508	31	115	180	111	734	137	91	186	117	182	75	22	26	162	93	165	828	190	73	239	121	378	181	106	56	99	3934	84	281	87
maltose	946601	361	1979	85:18.0 86:40.0 87:38.0 89:640.0 90:50.0 94:3.0 95:51.0 96:226.0 97:52.0 98:60.0 99:10.0 100:262.0 101:31.0 102:157.0 103:2571.0 104:171.0 105:231.0 108:7.0 109:86.0 111:17.0 112:13.0 113:130.0 114:62.0 116:82.0 117:1560.0 118:98.0 119:98.0 125:5.0 127:10.0 128:39.0 129:1849.0 130:331.0 131:223.0 132:24.0 133:813.0 134:81.0 140:25.0 141:77.0 142:107.0 143:428.0 145:58.0 147:3256.0 148:427.0 149:3…	439186	C00208	GUBGYTABKSRVRQ-PICCSMPSSA-N	0.78	0.04	6129	3975	2733	2934	374	57440	11339	3238	18268	6171	3790	8543	3607	766	35001	1842	2589	4248	2523	2931	701	819	508	1527	1026	1069	15749	2221	1475	2267	890	20984	5230	13343	608	1081	66075	4285	4831	536
malonic acid	305372	233	16918	85:1026.0 86:1326.0 87:4220.0 88:2045.0 89:1145.0 90:185.0 91:256.0 93:120.0 94:177.0 95:78.0 96:135.0 97:304.0 98:370.0 99:12693.0 100:1810.0 101:5145.0 102:1329.0 103:2418.0 104:448.0 105:1540.0 107:59.0 108:167.0 109:3011.0 110:122.0 111:448.0 113:89.0 114:57.0 115:3728.0 116:2072.0 117:4257.0 118:696.0 119:863.0 120:61.0 122:131.0 124:104.0 126:90.0 127:206.0 130:370.0 131:7673.0 132:1197.0 1…	867	C00383	OFOBLEOULBTSOW-UHFFFAOYSA-N	0.42	0.06	622	680	500	320	353	266	573	354	239	219	472	277	270	167	224	145	179	264	516	492	355	106	192	33	354	732	205	520	380	281	146	236	562	405	298	239	234	25	220	483
malic acid	463180	233	1391	85:66.0 87:316.0 88:106.0 89:148.0 90:42.0 95:37.0 99:129.0 101:4462.0 102:488.0 103:641.0 104:93.0 105:294.0 115:533.0 116:432.0 117:2305.0 118:259.0 119:501.0 120:70.0 121:62.0 124:21.0 129:385.0 131:1945.0 132:129.0 133:6850.0 134:1075.0 135:667.0 136:51.0 137:33.0 139:20.0 142:41.0 143:745.0 144:107.0 145:145.0 147:21089.0 148:2969.0 149:2528.0 150:99.0 151:286.0 153:24.0 158:12.0 159:29.0 16…	525	C00711	BJEPYKJPYRNKOW-UHFFFAOYSA-N	0.8	1	1384	15075	1912	2823	355	4461	548	1080	3882	1637	1098	3010	1093	9019	2314	425	1428	3084	7470	1993	553	1902	999	928	3321	1535	4983	634	1358	1088	210	410	659	2889	1431	2623	597	1807	633	982
maleic acid	365746	245	486561	85:72282.0 86:13877.0 87:30961.0 88:6161.0 89:18207.0 90:2221.0 91:2306.0 92:1524.0 94:998.0 95:2713.0 96:1461.0 97:7811.0 98:77584.0 99:39201.0 100:10438.0 101:20152.0 102:12743.0 103:49866.0 104:7841.0 105:21408.0 106:2695.0 107:2509.0 109:508.0 111:11912.0 112:2428.0 113:50456.0 114:5861.0 115:159938.0 116:20395.0 117:59055.0 118:9676.0 119:20411.0 120:2580.0 121:1798.0 122:243.0 124:258.0 125…	444266		VZCYOOQTPOCHFL-UPHRSURJSA-L	0.43	0	551	759	346	626	302	75	503	483	376	487	277	530	451	598	689	198	312	200	640	374	306	315	167	780	436	347	383	273	306	458	403	307	175	606	364	725	231	230	651	363
lyxose	540818	217	360841	86:84.0 87:151.0 88:150.0 89:2738.0 90:255.0 91:147.0 100:725.0 101:866.0 102:397.0 103:16183.0 104:1583.0 105:958.0 112:39.0 113:133.0 114:181.0 115:222.0 116:195.0 117:2331.0 118:244.0 119:285.0 120:38.0 127:111.0 128:36.0 129:1766.0 130:290.0 131:842.0 132:128.0 133:1834.0 134:293.0 135:187.0 138:20.0 142:84.0 143:261.0 144:52.0 145:129.0 146:52.0 147:5147.0 148:807.0 149:544.0 157:106.0 158:8…	439240	C00476	SRBFZHDQGSBBOR-AGQMPKSLSA-N	0.7	0.03	68992	3126	41507	41072	18344	3594	43495	98825	14833	60206	6467	9419	25817	18625	9034	6307	18552	2954	5139	16527	8336	16118	5693	14760	13774	25052	3465	9892	33761	10238	6839	9775	25500	4342	7896	6445	1904	737	5682	4891
lysine	662197	317	360160	85:4786.0 86:50806.0 87:6485.0 88:21649.0 89:2723.0 90:1721.0 94:1142.0 95:795.0 96:535.0 97:1150.0 98:3651.0 99:2928.0 100:47572.0 101:7430.0 102:13074.0 103:4519.0 104:946.0 106:143.0 107:120.0 108:162.0 109:304.0 110:594.0 111:231.0 112:11763.0 113:2727.0 114:12616.0 115:16345.0 116:6882.0 117:4303.0 118:1926.0 119:1449.0 120:195.0 121:379.0 123:316.0 124:795.0 125:493.0 126:4338.0 127:1011.0 …	5962	C00047	KDXKERNSBIXSRK-YFKPBYRVSA-N	0.96	0.96	339494	620943	206232	338086	157709	319963	275720	112975	485214	342339	442803	359373	195490	953233	282270	123833	187842	183606	439726	258556	222583	342840	160015	193457	316716	281925	300401	173558	358780	210863	164867	92533	337132	385155	299524	371172	783549	803349	268466	202736
lithocholic acid	1104161	215	126301	85:1051.0 86:214.0 87:393.0 88:172.0 89:970.0 91:5560.0 92:987.0 93:6695.0 94:1604.0 95:5528.0 96:566.0 97:938.0 98:52.0 99:238.0 100:101.0 101:849.0 102:241.0 103:652.0 104:234.0 105:5732.0 106:1812.0 107:5225.0 108:1570.0 109:2758.0 110:316.0 111:730.0 112:41.0 113:368.0 115:1035.0 116:1180.0 117:10120.0 118:1336.0 119:3671.0 120:1294.0 121:2765.0 122:991.0 123:1084.0 124:270.0 125:345.0 126:10…	9903	C03990	SMEROWZSTRWXGI-HVATVPOCSA-N	0.81	0	42059	116451	42378	35608	21468	75503	19788	22657	33115	23368	32077	165127	23551	5462	53033	22167	28686	26599	23479	24970	23966	25807	14287	34235	26533	45005	30333	25741	30140	33104	43961	16133	50290	72749	16178	164728	452	1309	39639	35603
linolenic acid	780376	335	4704	85:8263.0 86:3076.0 87:2638.0 88:1997.0 89:7764.0 90:1581.0 91:88210.0 92:18165.0 93:106470.0 94:49681.0 95:90232.0 96:13310.0 97:12053.0 98:4717.0 99:6412.0 100:1262.0 101:3274.0 102:1160.0 103:5418.0 104:2581.0 105:34033.0 106:9798.0 107:47500.0 108:55116.0 109:22200.0 110:3750.0 111:4531.0 112:1209.0 113:1357.0 114:277.0 115:3868.0 116:10630.0 117:51242.0 118:6917.0 119:21073.0 120:8375.0 121:…	5280934	C06427	DTOSIQBPPRVQHS-PDBXOOCHSA-N	0.23	0.19	1197	629	648	766	650	497	413	347	901	1035	521	282	1793	727	527	504	310	906	1767	564	463	1657	426	565	97	954	1322	644	1567	872	747	433	412	1087	396	469	76	39	872	820
linoleic acid	777414	337	165	85:1534.0 86:470.0 87:386.0 88:244.0 89:1256.0 90:176.0 91:6885.0 92:1525.0 93:8654.0 94:6153.0 95:14372.0 96:7918.0 97:3896.0 98:518.0 99:829.0 100:115.0 101:441.0 102:166.0 103:421.0 104:436.0 105:2615.0 106:995.0 107:4482.0 108:3591.0 109:5935.0 110:3865.0 111:1556.0 112:178.0 113:194.0 115:385.0 116:1903.0 117:9875.0 118:1041.0 119:1844.0 120:836.0 121:4850.0 122:2280.0 123:2389.0 124:1664.0 …	5280450	C01595	OYHQOLUKZRVURQ-HZJYTTRNSA-N	1	1	43445	20402	15535	22553	19037	15873	11588	9743	28039	22938	18728	8961	61660	22720	16869	13124	7837	33687	53581	12218	14514	51328	9316	13434	16430	36709	64090	20137	39524	21311	15347	16140	11203	28739	11510	13712	1377	2688	27007	28770
levoglucosan	569637	204	3169	85:775.0 87:165.0 88:163.0 89:177.0 90:42.0 91:21.0 92:2.0 95:13.0 97:132.0 98:53.0 99:731.0 100:180.0 101:2830.0 102:212.0 103:5456.0 104:270.0 105:366.0 109:317.0 111:424.0 112:33.0 113:818.0 114:131.0 115:724.0 116:1575.0 117:3643.0 118:337.0 119:568.0 120:38.0 125:69.0 126:44.0 127:263.0 129:5991.0 130:703.0 131:1830.0 132:221.0 133:3867.0 134:297.0 135:293.0 136:48.0 139:2.0 140:20.0 141:67.…	2724705		TWNIBLMWSKIRAT-VFUOTHLCSA-N	0.85	0.46	7562	4052	2311	827	564	1429	2558	1134	930	903	1623	1689	2063	909	1245	1430	986	900	970	625	534	770	623	271	1540	1533	2085	2445	600	2738	3333	5061	2905	1492	456	5611	82303	22577	2781	1051
leucine	345168	158	84921	85:4255.0 86:3321.0 87:4862.0 88:1815.0 89:5808.0 90:737.0 91:3465.0 92:1219.0 93:1050.0 94:206.0 95:597.0 96:1025.0 97:645.0 98:1470.0 99:1893.0 100:8521.0 101:2533.0 102:17396.0 103:18799.0 104:3755.0 105:8482.0 106:1272.0 107:5468.0 108:712.0 109:1678.0 110:679.0 111:174.0 112:443.0 113:769.0 114:594.0 115:14996.0 116:5260.0 117:7520.0 118:1448.0 119:9608.0 120:1063.0 121:6360.0 122:565.0 123:…	6106	C00123	ROHFNLRQFUQHCH-YFKPBYRVSA-N	0.78	0.95	226287	389087	255131	273481	391982	106160	233871	320296	478484	350244	554622	119443	512168	910438	128602	344143	225343	58860	353001	299394	285858	316254	118410	145834	289242	224812	186741	217968	254040	285683	96402	250922	410794	326829	743541	205316	1065024	650196	321529	133811
lauric acid	547800	257	356963	85:39.0 86:117.0 88:198.0 95:518.0 98:235.0 99:11520.0 101:218.0 102:113.0 104:110.0 107:194.0 109:98.0 111:135.0 112:246.0 113:262.0 116:516.0 117:5422.0 118:493.0 119:273.0 125:361.0 126:46.0 127:103.0 129:2474.0 130:941.0 131:1364.0 132:1778.0 133:69.0 134:94.0 137:329.0 139:169.0 141:106.0 143:253.0 145:894.0 150:35.0 153:146.0 155:1243.0 156:152.0 157:175.0 158:45.0 160:86.0 166:43.0 167:95.…	3893	C02679	POULHZVOKOAJMA-UHFFFAOYSA-N	0.94	0.98	7325	5203	12699	6507	2236	6619	5221	4675	3937	5492	3620	7169	7647	5583	6297	4580	3071	2963	5835	3708	3565	4716	2528	4323	4157	7534	8084	6073	6175	6821	6757	4242	25615	9732	2488	4840	3077	2233	8497	3729
lactulose	929908	204	6432	85:15.0 86:83.0 89:320.0 93:71.0 96:35.0 99:179.0 100:35.0 101:517.0 103:2907.0 104:50.0 105:154.0 109:103.0 113:221.0 114:90.0 115:12.0 116:235.0 117:787.0 118:124.0 124:47.0 126:14.0 129:3378.0 130:406.0 131:445.0 133:426.0 134:88.0 136:23.0 137:31.0 139:22.0 141:191.0 143:655.0 144:48.0 145:261.0 147:4074.0 148:387.0 149:168.0 150:56.0 153:61.0 155:144.0 156:88.0 157:219.0 158:34.0 159:34.0 16…	11333	C07064	JCQLYHFGKNRPGE-FCVZTGTOSA-N	0.2	0	15012	10903	9788	8621	6646	13084	10323	10565	12455	5800	5993	1708	13193	5155	29330	8950	7231	1438	1072	1688	13318	1164	722	2850	11832	4230	1512	1585	16838	2321	7896	6856	17840	1864	776	3021	12857	1170	17718	3960
lactose	936998	204	217651	85:718.0 86:125.0 87:742.0 88:514.0 89:1519.0 90:90.0 91:1172.0 92:290.0 93:2096.0 94:473.0 95:8128.0 96:660.0 97:648.0 98:146.0 99:644.0 100:89.0 101:2780.0 102:491.0 103:10066.0 104:786.0 105:602.0 106:52.0 107:403.0 108:128.0 109:536.0 111:245.0 112:51.0 113:534.0 114:16.0 115:273.0 116:1295.0 117:4056.0 118:232.0 119:356.0 120:59.0 121:632.0 122:23.0 123:606.0 124:68.0 125:108.0 126:48.0 127:…	6134	C01970	GUBGYTABKSRVRQ-DCSYEGIMSA-N	0.41	0	41668	23708	10824	21668	14778	17927	22135	25172	31209	13919	11707	2197	34340	6852	9246	17238	17874	1414	1134	5196	31153	1372	1603	7466	31896	6746	2782	9242	38151	9127	4687	15295	49282	3397	752	1992	24260	220	23804	1286
lactic acid	219848	191	46123	86:16619.0 87:146789.0 88:203478.0 89:44021.0 90:4589.0 91:5399.0 92:2326.0 93:2115.0 94:10118.0 95:3417.0 96:954.0 97:589.0 99:12540.0 100:2928.0 101:119286.0 102:104206.0 103:90957.0 104:16144.0 105:36142.0 106:5020.0 107:5840.0 108:885.0 109:791.0 110:2194.0 113:11122.0 114:2567.0 115:74843.0 116:33695.0 117:2428105.0 118:268597.0 119:128879.0 120:10300.0 121:3135.0 122:950.0 123:1352.0 124:11…	612	C01432	JVTAAEKCZFNVCJ-UHFFFAOYSA-N	0.77	0.54	235568	45055	328834	33990	342302	70265	60343	188784	24063	41866	12758	27888	63243	116730	27937	105478	60584	24939	20120	328946	33540	23796	16054	37404	32820	33987	34361	39815	34319	40718	20389	128049	148295	70507	8626	61983	504635	953150	1056998	19683
kynurenine	762593	192	342953	85:3695.0 86:2555.0 87:1829.0 89:2647.0 90:2187.0 91:5461.0 92:3360.0 93:1817.0 94:541.0 96:228.0 99:1830.0 102:962.0 103:1595.0 105:1858.0 106:840.0 107:309.0 108:220.0 109:162.0 112:332.0 113:1068.0 117:3580.0 118:6635.0 119:2607.0 120:11880.0 121:1345.0 122:162.0 123:307.0 130:8182.0 131:3268.0 132:3771.0 133:2192.0 134:6764.0 135:1853.0 136:1573.0 137:244.0 141:417.0 142:467.0 143:557.0 144:3…	846		YGPSJZOEDVAXAB-UHFFFAOYSA-N	0.03	0.98	9052	3006	5125	11173	8998	3328	8544	12686	8902	4785	5396	909	6401	2290	4305	838	8160	2498	6678	17084	9109	11829	5322	9786	14769	7221	2123	13716	9735	19333	10435	9034	10800	2288	3259	5245	634	1273	4700	16996
kynurenic acid	726186	231	119053	85:781.0 86:1357.0 87:2492.0 88:5156.0 89:8929.0 90:1258.0 91:2822.0 92:862.0 93:1829.0 94:778.0 97:206.0 98:494.0 99:2711.0 100:5342.0 101:5061.0 102:2351.0 103:4503.0 104:1702.0 105:4045.0 106:602.0 107:467.0 108:840.0 109:259.0 110:618.0 112:77.0 113:2061.0 114:5278.0 115:19413.0 116:5389.0 117:3059.0 118:859.0 119:2308.0 120:604.0 121:700.0 122:3920.0 123:620.0 124:82.0 125:88.0 126:859.0 127…	3845	C01717	HCZHHEIFKROPDY-UHFFFAOYSA-N	0.56	0.6	1810	10379	5654	3143	609	1274	1529	1146	602	422	508	2758	952	14749	1193	578	241	1847	616	658	1431	709	256	588	661	719	961	512	924	569	1462	1288	4901	1962	818	2336	67124	5949	3451	1436
ketoisoleucine	302228	89	5691	85:978.0 86:597.0 88:128.0 89:4661.0 90:393.0 91:566.0 93:114.0 95:1.0 96:19.0 97:472.0 98:312.0 99:254.0 100:420.0 101:59.0 105:29.0 107:130.0 108:16.0 110:923.0 111:112.0 112:177.0 113:1093.0 114:791.0 115:569.0 116:189.0 117:229.0 118:57.0 119:154.0 125:3.0 126:122.0 127:35.0 128:231.0 129:566.0 130:499.0 131:118.0 132:21.0 133:191.0 134:229.0 140:270.0 141:113.0 142:85.0 144:77.0 146:342.0 14…	47	C03465	JVQYSWDUAOAHFM-UHFFFAOYSA-N	0.01	0.81	5731	5268	6421	3856	499	3253	6826	2826	305	6314	2198	8850	7639	3750	7678	8040	1839	3824	3347	12624	3010	2439	228	9134	4172	4267	10337	10698	8327	4621	3578	2553	4912	14068	1880	5283	2442	2017	5849	418
isothreonic acid	489385	292	1679	85:304.0 86:391.0 88:631.0 89:4158.0 90:414.0 91:179.0 92:233.0 93:215.0 94:45.0 96:145.0 97:116.0 98:15.0 99:816.0 100:110.0 101:2762.0 102:21122.0 103:20966.0 104:2634.0 105:1408.0 106:64.0 107:560.0 108:290.0 109:71.0 110:395.0 111:105.0 113:1032.0 114:253.0 115:1508.0 116:877.0 117:33848.0 118:3267.0 119:2907.0 120:140.0 121:96.0 122:8.0 124:18.0 125:13.0 127:531.0 128:50.0 129:6995.0 130:178…	151152	C00639	JPIJQSOTBSSVTP-GBXIJSLDSA-N	0.63	0.99	2531	1622	1554	1967	1538	1552	1483	1707	2480	1511	1831	1270	2180	1752	1386	2440	1363	1613	1156	2822	1803	1248	959	2912	2464	204	1389	2595	2208	1647	2774	3660	6387	1496	1239	953	1737	2594	4267	1434
isopropylbenzene	240619	105	355471	85:1311.0 86:399.0 87:37.0 89:437.0 90:141.0 94:100.0 99:285.0 101:380.0 104:185.0 105:66436.0 106:5251.0 107:386.0 108:70.0 110:381.0 111:454.0 112:39.0 113:344.0 114:128.0 115:417.0 120:19780.0 121:620.0 122:151.0 127:417.0 130:215.0 136:33.0 141:887.0 142:122.0 143:200.0 145:74.0 150:137.0 151:202.0 154:74.0 157:158.0 159:340.0 162:34.0 163:320.0 166:92.0 168:54.0 169:23.0 172:81.0 173:43.0 17…	7406	C14396	RWGFKTVRMDUZSP-UHFFFAOYSA-N	0.22	0	15603	16039	10101	14750	8932	7367	6830	13239	10354	7154	9128	10330	10504	13758	5000	6608	7847	17444	12038	26416	9731	10108	6538	4579	5178	12241	14043	6878	3541	15253	7110	6959	13705	17780	7390	9964	13632	5252	16405	5759
isopentadecanoic acid	663518	117	127681	88:64.0 89:228.0 90:112.0 93:421.0 94:37.0 95:953.0 97:1254.0 98:617.0 103:1227.0 104:260.0 105:933.0 106:108.0 107:336.0 109:322.0 110:82.0 111:698.0 112:162.0 115:294.0 116:1395.0 117:19993.0 118:1820.0 119:895.0 120:86.0 124:16.0 125:222.0 126:32.0 129:10417.0 130:1111.0 131:2939.0 132:4123.0 133:1561.0 134:214.0 135:308.0 137:11.0 139:49.0 143:980.0 145:2590.0 146:288.0 147:2838.0 153:44.0 15…	151014		ZOCYQVNGROEVLU-UHFFFAOYSA-N	0.46	0	48562	44856	17433	11258	63470	61563	38917	60086	38513	54623	3977	37716	67567	42685	14929	38909	93763	54651	67178	49209	90737	32279	47037	62798	62577	83990	21420	90107	98960	2817	32536	25834	14781	24997	47888	33975	44323	20144	16248	119453
isomyristic acid	618747	117	127696	85:609.0 88:133.0 89:282.0 90:40.0 91:187.0 93:525.0 95:819.0 97:563.0 98:253.0 99:185.0 101:354.0 104:56.0 105:386.0 106:99.0 107:132.0 109:291.0 112:173.0 116:773.0 117:13780.0 118:1304.0 119:752.0 120:48.0 121:134.0 127:203.0 129:6564.0 130:752.0 131:2009.0 132:3951.0 133:514.0 134:177.0 135:273.0 141:195.0 143:752.0 145:2234.0 146:347.0 151:18.0 155:70.0 159:198.0 161:17.0 162:27.0 164:60.0 1…	520298		YYVJAABUJYRQJO-UHFFFAOYSA-N	0.13	0	4620	6482	2461	4089	1816	3708	3472	3592	7258	6888	3689	7984	5764	9919	5459	3293	5344	4210	7032	3573	8070	6000	2578	16361	10886	4401	12556	6638	12203	4974	4867	2977	5518	11105	3253	6011	4532	4611	4454	5294
isomaltotriose	1197109	361	62281	85:810.0 86:312.0 87:786.0 88:317.0 89:4725.0 90:523.0 94:134.0 95:396.0 97:2547.0 99:935.0 100:2506.0 101:3120.0 102:943.0 103:38527.0 104:2801.0 105:2902.0 106:455.0 109:1912.0 110:143.0 111:661.0 112:147.0 113:1279.0 114:535.0 115:1168.0 116:1515.0 117:16044.0 118:1730.0 119:1453.0 120:136.0 121:115.0 123:189.0 125:228.0 126:30.0 127:1027.0 128:650.0 129:21488.0 130:3094.0 131:5010.0 132:755.0…	439668		FBJQEBRMDXPWNX-FYHZSNTMSA-N	0.18	0	142	196	89	77	22	58	88	284	30	48	61	156	149	83	102	217	108	64	43	58	58	36	24	89	104	75	284	68	59	43	60	85	47	94	56	126	17875	326	236	135
isomaltose	983199	361	127715	87:1211.0 88:604.0 89:4249.0 90:267.0 91:161.0 92:118.0 93:181.0 94:152.0 95:320.0 96:360.0 97:526.0 98:240.0 100:1628.0 101:6670.0 102:1545.0 103:10592.0 104:885.0 105:2387.0 107:114.0 108:114.0 109:551.0 110:107.0 111:1453.0 112:323.0 113:908.0 115:449.0 116:1006.0 117:8267.0 118:577.0 119:1599.0 124:48.0 125:234.0 126:350.0 127:713.0 128:652.0 129:7394.0 130:2008.0 131:1916.0 132:620.0 133:609…	439193	C00252	DLRVVLDZNNYCBX-RTPHMHGBSA-N	0.46	0	1238	748	465	574	133	311	718	264	593	327	11478	1821	273	789	531	318	235	249	384	269	198	217	208	147	358	380	650	172	288	261	202	317	1475	507	163	440	289431	3318	295	384
isoleucine	295269	86	66254	85:29700.0 86:1679594.0 87:1033918.0 88:242006.0 89:32530.0 90:4609.0 91:25638.0 92:13288.0 93:1456.0 94:2719.0 95:2541.0 96:35629.0 97:10944.0 99:18277.0 100:18364.0 101:10494.0 102:46817.0 103:665017.0 104:227754.0 105:52459.0 106:10467.0 110:6937.0 111:2076.0 112:2915.0 113:6827.0 114:8081.0 115:7642.0 116:5697.0 117:20375.0 118:14990.0 119:10663.0 120:5135.0 121:1306.0 122:469.0 124:3636.0 12…	6306	C00407	AGPKZVBTJJNPAG-WHFBIAKZSA-N	1	1	73341	140887	124140	120904	163230	33142	85776	156389	182671	198774	219198	36598	171311	414891	51000	145240	118486	30637	138822	136085	141582	121844	37441	72374	127947	103293	71632	106621	85476	124833	27460	107618	205607	104478	354449	64882	556630	315159	108233	51624
isocitric acid	617338	245	32122	85:2447.0 86:626.0 87:1258.0 88:847.0 89:1234.0 90:260.0 91:1069.0 92:228.0 93:230.0 94:47.0 95:3308.0 97:857.0 98:490.0 99:1992.0 100:157.0 101:1347.0 102:1246.0 103:1778.0 104:706.0 105:2996.0 106:205.0 107:136.0 108:170.0 109:137.0 110:130.0 111:512.0 112:175.0 113:5118.0 114:643.0 115:1659.0 116:2844.0 117:4523.0 118:958.0 119:1389.0 120:194.0 121:151.0 122:61.0 123:48.0 124:33.0 125:32.0 126…	5318532	C00451	ODBLHEXUDAPZAU-ZAFYKAAXSA-N	0	0.18	4478	557	1415	3358	1703	88	1618	72	92	53	363	590	94	135	55	86	56	161	116	6484	74	64	227	146	349	2578	344	133	194	82	57	153	119	137	632	120	223	314	207	36
isocholic acid	1115218	253	126885	85:535.0 86:66.0 88:72.0 89:475.0 90:55.0 91:1932.0 92:291.0 93:1792.0 94:562.0 95:1487.0 97:252.0 98:77.0 99:205.0 101:490.0 102:75.0 103:652.0 105:2279.0 106:286.0 107:1043.0 108:150.0 109:838.0 110:115.0 111:113.0 113:174.0 114:44.0 115:496.0 116:482.0 117:2536.0 118:520.0 119:1144.0 120:403.0 121:1045.0 122:289.0 123:181.0 124:43.0 128:238.0 129:3197.0 130:365.0 131:1644.0 132:741.0 133:1277.…	5283870		BHQCQFFYRZLCQQ-UXWVVXDJSA-N	0.25	0	1788	5085	1809	3014	9224	4065	2674	1475	2369	274	2012	10204	1528	559	1331	1397	629	809	1361	1991	2453	1337	601	2862	654	3564	10457	8045	420	763	8890	14320	3018	3698	2876	8364	644	136	14378	3198
inosine	897434	230	84524	85:1568.0 86:780.0 87:1166.0 88:560.0 89:1904.0 91:15501.0 92:2918.0 93:6326.0 94:1647.0 95:2401.0 97:1081.0 98:220.0 99:1165.0 100:804.0 101:3341.0 102:808.0 103:15276.0 104:2320.0 105:6001.0 106:3197.0 107:1491.0 108:2478.0 109:746.0 110:1136.0 111:1921.0 112:413.0 113:1448.0 114:353.0 115:3043.0 116:2998.0 117:9407.0 118:1635.0 119:4572.0 120:1119.0 121:826.0 122:365.0 123:390.0 124:342.0 125:…	6021	C00294	UGQMRVRMYYASKQ-KQYNXXCUSA-N	0.19	0.61	1677	111	139	273	149	127	3318	278	58	149	135	60	652	165	188	279	67	181	175	160	158	232	96	512	69	114	147	469	2255	2217	1383	377	328	98	70	248	3810	527	263	247
indoxyl sulfate	577333	277	31543	85:106.0 86:115.0 87:397.0 89:367.0 90:218.0 91:314.0 92:133.0 93:435.0 95:66.0 98:81.0 102:189.0 103:726.0 104:409.0 105:728.0 106:257.0 107:328.0 108:72.0 109:26.0 110:29.0 114:22.0 115:197.0 116:67.0 118:213.0 119:1492.0 120:307.0 121:100.0 128:66.0 129:195.0 130:1028.0 131:317.0 132:529.0 133:648.0 134:1668.0 135:299.0 136:94.0 138:1.0 142:21.0 143:214.0 144:213.0 145:375.0 146:681.0 150:37.0…	10258		BXFFHSIDQOFMLE-UHFFFAOYSA-N	0	0.63	9348	7530	5964	9057	7807	3975	5151	11006	5814	3732	3707	1421	2901	13405	1836	3502	1426	3035	6199	15276	8813	16871	6710	8262	7999	4525	3058	3535	19499	9841	23504	2605	29206	1950	2259	10975	2867	3358	23230	1948
indole-3-propionic acid	732249	202	112556	87:70.0 88:158.0 89:68.0 90:41.0 91:71.0 92:64.0 95:39.0 97:42.0 98:35.0 99:26.0 100:39.0 101:366.0 102:341.0 103:158.0 105:171.0 106:49.0 107:35.0 110:22.0 112:28.0 115:425.0 116:1095.0 117:386.0 118:130.0 119:72.0 120:57.0 121:56.0 122:61.0 125:26.0 126:56.0 128:201.0 129:687.0 130:640.0 131:205.0 132:135.0 133:93.0 134:96.0 135:71.0 136:49.0 138:51.0 140:47.0 141:68.0 142:207.0 143:295.0 144:2…	3744		GOLXRNDWAUTYKT-UHFFFAOYSA-N	0.16	0.71	14232	11378	7508	24023	10605	10515	8085	18048	28313	21823	6627	16607	9943	13024	9764	10892	26465	5545	9211	22011	20674	13565	18528	11465	38531	8952	9678	12794	14663	9110	6556	5379	13929	12157	10552	7048	7426	6764	12156	4112
indole-3-lactate	764079	202	390397	85:444.0 88:82.0 93:562.0 98:2672.0 99:397.0 100:151.0 102:683.0 103:415.0 105:150.0 106:86.0 115:522.0 117:416.0 120:61.0 125:33.0 127:108.0 128:271.0 129:831.0 130:1029.0 131:634.0 132:302.0 133:615.0 134:42.0 140:85.0 142:388.0 143:138.0 144:158.0 145:353.0 146:127.0 147:2739.0 148:571.0 149:215.0 153:26.0 154:62.0 156:176.0 158:86.0 160:83.0 162:56.0 164:36.0 168:77.0 170:236.0 171:61.0 172:1…	92904		XGILAAMKEQUXLS-UHFFFAOYSA-N	0.49	1	126827	18915	54421	142478	69516	33998	143500	110420	123264	71519	50861	54167	151861	4606	85199	72742	60739	18620	71401	132773	72527	113014	56198	120058	126430	88507	25376	140918	161651	162871	127466	92446	88017	29476	43102	45825	2186	27922	18673	141082
indole-3-acetate	684929	202	69	85:142.0 87:38.0 89:42.0 91:40.0 100:21.0 101:105.0 102:208.0 105:43.0 115:43.0 116:34.0 119:53.0 121:26.0 128:130.0 129:377.0 130:199.0 131:197.0 133:47.0 145:101.0 148:147.0 157:44.0 160:50.0 161:30.0 167:14.0 169:17.0 170:37.0 172:34.0 174:29.0 184:57.0 186:179.0 187:57.0 200:136.0 201:41.0 202:3519.0 203:606.0 204:162.0 217:45.0 226:14.0 228:28.0 276:55.0 319:239.0 320:67.0 321:16.0 330:17.0 …	802	C00954	SEOVTRFCIGRIMH-UHFFFAOYSA-N	0.63	0.53	28953	19612	13704	34430	9055	17857	28888	20549	25122	38920	22503	72284	24741	166367	21729	14131	17071	6700	32272	25629	14662	15431	14658	20562	22654	18629	230407	25870	29551	33621	23253	14271	36811	104122	27653	33704	4098	620	23293	20720
hypoxanthine	619128	265	1663	85:17650.0 86:12163.0 87:3151.0 88:967.0 89:1497.0 90:1362.0 91:1011.0 92:2327.0 93:2705.0 94:2109.0 95:8249.0 96:4731.0 97:4274.0 98:10523.0 99:10631.0 100:18705.0 101:4328.0 102:2856.0 103:1825.0 104:825.0 105:732.0 106:877.0 107:1246.0 108:1010.0 109:1929.0 110:7804.0 111:16720.0 112:8157.0 113:3184.0 114:2386.0 115:2768.0 116:1782.0 117:3672.0 118:1096.0 119:3047.0 120:887.0 121:1152.0 122:16…	790	C00262	FDGQSTZJBFJUBT-UHFFFAOYSA-N	0.44	0.15	16105	9856	10631	24318	27650	7288	6306	24621	4606	12683	2093	4769	3673	5250	4362	6704	9628	400	6960	8156	3883	14539	3525	6328	4574	5931	1403	6731	35318	12527	10124	2534	17288	5396	2908	3290	2805	7618	3736	13630
hypotaurine	525092	188	31223	86:1014.0 87:116.0 88:90.0 89:68.0 90:17.0 91:63.0 92:40.0 94:26.0 98:37.0 99:240.0 100:6173.0 101:708.0 102:301.0 103:213.0 104:146.0 105:183.0 106:48.0 110:49.0 113:142.0 114:1274.0 117:377.0 118:68.0 119:29.0 120:26.0 121:58.0 122:28.0 123:14.0 126:44.0 127:49.0 128:31.0 129:49.0 130:843.0 131:338.0 133:665.0 134:59.0 135:121.0 136:23.0 137:78.0 140:230.0 141:34.0 142:206.0 144:249.0 145:134.0…	107812	C00519	VVIUBCNYACGLLV-UHFFFAOYSA-N	0.16	0.8	866	1173	429	865	306	719	580	699	802	310	880	277	708	797	808	567	545	569	771	195	630	796	479	870	971	1048	871	989	862	908	860	616	1249	143	951	942	343	306	1077	908
hydroquinone	422583	239	16709	85:15.0 86:19.0 88:14.0 91:275.0 94:176.0 95:72.0 96:114.0 97:3.0 98:65.0 110:71.0 112:755.0 113:60.0 120:6.0 123:15.0 124:34.0 130:1.0 134:225.0 135:23.0 138:35.0 140:20.0 144:12.0 147:267.0 167:13.0 174:41.0 182:51.0 196:25.0 211:51.0 212:37.0 223:305.0 224:15.0 225:20.0 237:5.0 239:2779.0 240:576.0 241:199.0 254:1651.0 255:346.0 256:81.0 258:5.0 261:4.0 299:12.0 301:9.0 316:15.0 327:20.0 333:7…	785	C00530	QIGBRXMKCJKVMJ-UHFFFAOYSA-N	0.72	0.48	5985	1677	3843	2012	2126	1723	7995	5934	2839	2684	3596	3387	7600	3202	4017	4155	1074	1930	1778	4751	311	1198	2884	3643	2824	2529	2604	5296	3434	7643	5246	3431	4901	4573	5227	2725	839	642	7599	1867
hydrocinnamic acid	434422	104	114270	87:151.0 88:97.0 89:407.0 90:38.0 91:5899.0 92:317.0 95:25.0 97:26.0 99:208.0 101:354.0 102:462.0 103:1538.0 104:16884.0 105:1908.0 106:92.0 107:102.0 108:17.0 109:55.0 111:38.0 112:47.0 114:127.0 115:166.0 116:530.0 121:73.0 122:16.0 124:42.0 125:56.0 126:15.0 129:95.0 131:794.0 132:579.0 134:87.0 135:44.0 136:59.0 138:21.0 140:28.0 141:52.0 145:107.0 146:114.0 150:22.0 151:57.0 155:54.0 156:43.…	107	C05629	XMIIGOLPHOKFCH-UHFFFAOYSA-N	0.57	0	84749	717174	238378	265228	28704	48827	34530	71496	73875	45697	35593	59291	52436	5414	59065	31308	228307	82036	27151	86745	58369	28878	41991	30910	107452	65940	25734	52893	38799	36480	6298	17363	73918	11076	59255	22734	111990	20498	44718	52047
homoserine	443878	218	2849	101:66.0 102:400.0 103:4169.0 104:311.0 105:88.0 108:5.0 113:20.0 114:56.0 115:64.0 116:6.0 117:924.0 118:50.0 125:1.0 128:3071.0 129:503.0 130:734.0 131:345.0 132:149.0 133:513.0 134:269.0 135:55.0 139:3.0 140:11.0 141:19.0 145:11.0 146:159.0 147:1347.0 148:40.0 149:294.0 157:459.0 158:17.0 159:17.0 172:20.0 177:38.0 180:8.0 184:17.0 185:46.0 191:9.0 199:4.0 200:1.0 202:287.0 204:73.0 208:3.0 21…	12647	C00263	UKAUYVFTDYCKQA-VKHMYHEASA-N	0.33	0.05	710	880	2461	1110	241	521	1474	782	704	2710	713	2413	2958	693	1663	2595	1358	272	816	813	2685	756	450	3742	1490	985	1888	2965	2160	1108	1521	417	1065	1146	1915	626	177	3213	2457	999
homocystine	874865	128	2786	85:58.0 87:20.0 88:504.0 89:93.0 91:89.0 94:14.0 100:924.0 101:447.0 102:115.0 103:1568.0 104:115.0 107:34.0 108:14.0 110:41.0 112:98.0 113:23.0 114:484.0 115:132.0 116:34.0 117:946.0 118:171.0 119:35.0 126:15.0 128:10523.0 129:2584.0 130:634.0 131:361.0 132:23.0 133:451.0 134:29.0 142:4.0 143:6.0 144:24.0 145:41.0 146:130.0 147:2201.0 148:453.0 149:191.0 153:17.0 158:137.0 159:48.0 160:3354.0 16…	10010	C01817	ZTVZLYBCZNMWCF-UHFFFAOYSA-N	0.49	0.39	1030	7882	1063	2303	1366	6905	1409	1610	8930	5714	5486	10664	1625	8461	6473	2164	3503	4472	5790	1230	3232	3352	3765	2534	1743	4019	6704	1792	1372	1058	997	1463	2030	11735	1864	6579	1166	1895	1593	1291
histidine	663790	154	150	85:2111.0 91:78.0 92:216.0 93:168.0 96:546.0 97:628.0 98:534.0 99:1060.0 100:5400.0 104:467.0 105:300.0 106:130.0 110:273.0 112:1060.0 113:608.0 116:436.0 117:2105.0 118:701.0 119:507.0 120:167.0 122:47.0 125:129.0 126:813.0 127:915.0 128:1600.0 129:1815.0 130:896.0 131:728.0 132:1925.0 133:1640.0 134:509.0 135:105.0 136:198.0 137:126.0 138:252.0 139:546.0 141:244.0 143:889.0 145:717.0 148:542.0 …	6274	C00135	HNDVDQJCIGZPNO-YFKPBYRVSA-N	0.09	0.79	15075	24664	7733	12307	4611	12506	11606	3313	17968	15515	13112	17296	8019	22276	12545	4870	7228	6206	16241	6263	7865	10440	4234	8989	11637	10675	13716	6126	16678	5222	6712	2977	11737	16429	12622	13938	70374	40946	10531	7175
histamine	648899	174	224998	85:49670.0 86:1134778.0 87:108344.0 88:43661.0 89:2348.0 90:686.0 93:1297.0 94:3970.0 95:9298.0 96:13709.0 97:13903.0 98:42723.0 99:21470.0 100:656911.0 101:89065.0 102:63809.0 103:4501.0 104:1694.0 106:1163.0 107:1460.0 108:2170.0 109:4306.0 110:14879.0 111:27817.0 112:52305.0 113:34138.0 114:25122.0 115:20968.0 116:51002.0 117:45020.0 118:9453.0 120:1822.0 121:4198.0 122:2634.0 123:11124.0 124:…	774	C00388	NTYJJOPFIAHURM-UHFFFAOYSA-N	0.14	0	22579	10766	5125	10779	24821	9941	10480	3463	54553	5807	40273	28230	7165	16669	95276	48069	102655	6062	7435	5979	14889	4968	58549	43419	58244	11955	9322	7800	14724	7023	5895	7166	14363	1087	12758	75199	48678	44871	35694	82251
heptadecanoic acid	751309	117	727	86:84.0 89:126.0 93:146.0 95:297.0 97:364.0 98:171.0 99:152.0 101:71.0 105:120.0 107:47.0 109:65.0 111:142.0 112:68.0 113:69.0 116:319.0 117:6884.0 118:515.0 119:190.0 123:26.0 125:38.0 129:2928.0 130:357.0 131:779.0 132:2003.0 133:510.0 134:126.0 141:18.0 143:248.0 145:1080.0 146:130.0 149:39.0 152:19.0 153:14.0 159:91.0 163:18.0 171:63.0 174:86.0 177:28.0 182:19.0 187:82.0 189:15.0 197:18.0 201…	10465		KEMQGTRYUADPNZ-UHFFFAOYSA-N	1	1	16790	22096	11544	14453	9666	15413	9260	10540	11674	12300	10812	16767	19124	14981	12432	10304	8333	11387	19979	13600	13991	11238	5936	12722	16993	22619	29036	15489	13631	15999	10258	9909	13555	23585	8295	20526	11765	12300	19504	17329
guanosine	954962	324	1966	85:1543.0 86:695.0 87:960.0 88:305.0 89:2775.0 90:249.0 91:343.0 93:203.0 94:284.0 95:499.0 96:239.0 97:2078.0 98:737.0 99:4070.0 100:2326.0 101:4073.0 102:1037.0 103:34450.0 104:3406.0 105:1568.0 106:62.0 107:214.0 109:142.0 110:455.0 111:1465.0 112:454.0 113:1897.0 114:483.0 115:8354.0 116:2447.0 117:6988.0 118:924.0 119:1155.0 120:232.0 121:117.0 122:147.0 123:259.0 124:207.0 125:458.0 126:538…	6802	C00387	NYHBQMYGNKIUIF-UUOKFMHZSA-N	0.3	0.13	169	602	530	520	455	621	2165	413	344	275	368	194	1165	448	446	603	108	390	459	357	844	538	188	1008	307	880	170	1212	2515	2543	2193	683	509	158	131	1099	1512	544	215	1718
guanine	744307	352	2519	85:485.0 86:288.0 87:42.0 89:317.0 95:86.0 98:175.0 99:1474.0 100:782.0 101:980.0 102:75.0 103:1581.0 104:106.0 105:14.0 110:49.0 111:272.0 112:15.0 113:289.0 114:183.0 115:231.0 116:930.0 117:753.0 118:116.0 119:40.0 122:16.0 124:27.0 125:94.0 126:14.0 127:102.0 128:117.0 129:1922.0 130:538.0 131:1046.0 132:378.0 133:1248.0 135:247.0 137:42.0 138:19.0 139:86.0 140:23.0 141:220.0 142:118.0 143:24…	764	C00242	UYTPUPDQBNUYGX-UHFFFAOYSA-N	0.57	0	9683	8260	6049	11060	9063	2835	1828	2185	8575	2424	3444	890	1451	12133	3080	2150	1831	2619	10472	3197	6155	5802	2876	2770	5734	5145	1072	2673	7663	3643	2316	2097	4615	1099	2341	7538	762	162	2762	7732
glycyl-proline	691662	174	66282	86:110410.0 87:18469.0 88:5410.0 89:305.0 90:1180.0 92:179.0 94:904.0 96:3134.0 97:1552.0 98:8378.0 99:3530.0 100:58649.0 101:13921.0 102:20729.0 103:27199.0 104:2954.0 105:2138.0 106:253.0 108:417.0 109:4375.0 110:4363.0 111:2428.0 112:4354.0 113:786.0 114:12608.0 115:9291.0 117:36584.0 118:4942.0 119:5447.0 120:1680.0 121:108.0 123:274.0 124:1428.0 125:1183.0 126:3900.0 127:636.0 128:7596.0 129…	3013625		KZNQNBZMBZJQJO-YFKPBYRVSA-N	0.39	0	17456	10669	17338	6960	1772	23396	7346	25314	3765	10951	8380	6980	12136	5446	1134	8042	16635	25519	20015	5936	14512	21034	10230	5036	5314	6588	3590	21324	18662	13726	6800	2989	5743	9861	6177	11532	6334	7320	14031	20340
glycolic acid	227215	177	34086	87:1425.0 92:213.0 93:59.0 94:53.0 100:1068.0 101:928.0 102:746.0 103:3767.0 104:374.0 105:894.0 106:225.0 109:62.0 115:803.0 116:336.0 119:879.0 120:116.0 121:21.0 133:7528.0 137:4.0 152:79.0 153:20.0 154:42.0 156:71.0 157:41.0 158:44.0 160:65.0 161:3953.0 162:856.0 163:458.0 164:50.0 165:50.0 166:7.0 168:24.0 173:188.0 175:46.0 176:27.0 177:10553.0 178:1655.0 179:815.0 180:109.0 182:15.0 184:77…	757	C00160	AEMRFAOFKBGASW-UHFFFAOYSA-N	0.99	0.85	47926	41800	30359	41156	31145	24151	28831	25261	27704	19298	25106	41581	24135	54487	18314	16617	23484	55560	16638	83898	42564	21812	19989	14413	25549	52360	26248	17784	24522	44567	36107	25068	21377	87908	13571	45271	46208	4697	22283	37917
glycine	371151	248	64525	85:75814.0 86:2816735.0 87:302395.0 88:116833.0 89:7602.0 95:9355.0 99:34999.0 100:1533047.0 101:311365.0 102:113852.0 103:73736.0 104:8779.0 105:23336.0 107:1940.0 109:812.0 112:6222.0 113:61026.0 114:46397.0 115:74595.0 116:105932.0 117:303656.0 118:57931.0 119:112683.0 120:15019.0 121:4388.0 123:1246.0 128:7332.0 130:296201.0 131:331580.0 132:89307.0 133:1173641.0 134:175507.0 135:87437.0 139:…	750	C00037	DHMQDGOQFOQNFH-UHFFFAOYSA-N	0.99	1	72671	45226	69891	57445	112318	21391	130120	93484	77660	85908	81683	59933	76858	164218	48863	77494	48331	26768	32150	74230	63145	80035	36382	110890	139693	96795	87169	111446	76898	134982	77349	123272	61758	105994	50905	35304	161375	93086	60806	26433
glycerol-alpha-phosphate	590747	357	1687	85:750.0 87:846.0 88:468.0 89:1193.0 90:82.0 91:168.0 92:114.0 93:127.0 94:26.0 95:116.0 97:212.0 98:232.0 99:483.0 101:13348.0 102:1461.0 103:9463.0 104:991.0 105:689.0 106:35.0 107:239.0 108:36.0 109:51.0 111:385.0 113:2220.0 114:284.0 115:2195.0 116:2414.0 117:2066.0 118:407.0 119:755.0 120:59.0 121:349.0 122:90.0 123:101.0 125:30.0 127:73.0 129:6764.0 130:1365.0 131:6671.0 132:512.0 133:8224.…	754	C03189	AWUCVROLDVIAJX-UHFFFAOYSA-N	0.94	1	8528	2635	3343	2004	2616	1706	3701	1352	2774	2093	2096	2645	5412	4979	4210	2044	955	1007	2974	6556	2398	2205	1179	1625	3703	1942	2901	4421	5803	6908	6480	6369	7952	2560	1606	2043	338	284	8968	1126
glycerol-3-galactoside	800205	204	100875	85:119.0 86:50.0 88:92.0 89:704.0 90:63.0 97:170.0 99:209.0 101:1588.0 102:180.0 103:7466.0 104:638.0 105:274.0 113:140.0 114:16.0 115:228.0 116:505.0 117:2068.0 118:19.0 119:111.0 129:3086.0 130:248.0 131:1536.0 132:221.0 133:1744.0 135:112.0 136:31.0 141:23.0 143:419.0 144:45.0 147:6254.0 148:466.0 149:464.0 150:25.0 158:13.0 159:168.0 169:405.0 172:18.0 175:156.0 189:502.0 190:237.0 191:1005.0…	16048618	C05401	NHJUPBDCSOGIKX-NTXXKDEISA-N	0.35	0.04	3011	1695	780	1077	708	2707	1774	915	2982	1534	1283	1942	1418	2125	1255	1088	1029	901	2155	735	913	1529	679	1512	1343	799	2860	1183	1767	1214	882	960	3423	1848	371	2285	11485	6658	2105	908
glycerol	344428	205	102844	86:35649.0 87:13782.0 89:52081.0 90:4636.0 91:2790.0 92:331.0 94:2130.0 95:638.0 96:309.0 97:382.0 98:441.0 99:3874.0 100:44651.0 101:54722.0 102:14716.0 103:190700.0 104:22113.0 105:17401.0 106:820.0 113:6809.0 114:4692.0 115:32295.0 116:19426.0 117:387803.0 118:38731.0 119:35848.0 127:1203.0 128:4038.0 129:54615.0 130:16196.0 131:81985.0 132:12409.0 133:263730.0 134:35271.0 135:20567.0 146:458.…	753	C00116	PEDCQBHIVMGVHV-UHFFFAOYSA-N	0.96	0.94	309139	286863	92308	142516	101240	132842	70779	71117	164220	84678	54569	50336	229812	296498	92875	46440	65738	79728	392092	59644	69933	450122	53901	66781	114801	108198	119425	93113	320221	115129	70723	47633	81599	144435	42485	212983	57032	124747	74313	111576
glyceric acid	375052	189	203807	85:202.0 86:59.0 87:356.0 88:204.0 89:1230.0 90:86.0 91:41.0 93:6.0 97:1.0 98:13.0 99:126.0 100:5.0 101:2275.0 102:6907.0 103:7358.0 104:875.0 105:494.0 106:28.0 107:28.0 108:2.0 109:5.0 112:7.0 113:54.0 114:6.0 115:568.0 116:699.0 117:4268.0 118:408.0 119:699.0 120:59.0 121:35.0 122:3.0 124:1.0 127:59.0 129:148.0 130:2091.0 131:1677.0 132:285.0 133:7528.0 134:1102.0 135:741.0 136:55.0 137:7.0 13…	752		RBNPOMFGQQGHHO-UHFFFAOYSA-N	0.9	1	33232	9918	43748	29021	15199	8999	20961	18604	10007	14228	6199	7626	7908	28644	7021	8175	13144	13381	10662	17385	8294	14147	4343	14504	14791	14878	9355	9214	26108	8174	7219	6852	14221	816	8800	7786	6714	24404	17508	13247
glutaric acid	419420	261	102871	85:1528.0 86:213.0 87:792.0 88:96.0 89:183.0 91:86.0 92:19.0 95:25.0 96:23.0 97:2037.0 98:121.0 99:880.0 100:160.0 101:1460.0 102:1449.0 103:843.0 104:115.0 105:157.0 111:308.0 112:44.0 113:269.0 114:59.0 115:3003.0 116:406.0 117:885.0 119:176.0 122:26.0 123:36.0 125:74.0 126:25.0 127:2958.0 128:299.0 129:721.0 130:4450.0 131:2098.0 132:176.0 133:1958.0 134:209.0 135:134.0 136:37.0 138:22.0 140:3…	743	C00489	JFCQEDHGNNZCLN-UHFFFAOYSA-N	0.52	0.18	1261	1023	1998	1369	643	753	1266	2516	2065	1121	1221	2374	2901	742	862	463	90	819	71	1873	2878	1172	1167	2857	1607	864	1176	5511	2399	3476	3301	1563	1636	827	1102	551	1156	796	119	1874
glutamine	600000	156	171972	86:1008.0 87:256.0 88:222.0 90:245.0 94:189.0 96:280.0 97:328.0 98:717.0 100:3469.0 101:366.0 102:313.0 104:214.0 107:149.0 112:1011.0 113:678.0 114:1746.0 116:2134.0 118:20.0 119:321.0 121:86.0 126:499.0 128:4093.0 131:1699.0 132:1288.0 133:2351.0 139:1107.0 140:1327.0 141:56.0 142:377.0 144:424.0 145:1566.0 147:10332.0 148:1224.0 149:833.0 150:22.0 155:12949.0 156:35859.0 157:2758.0 158:1324.0 …	5961	C00064	ZDXPYRJPNDTMRX-VKHMYHEASA-N	0.65	0.99	29261	12204	27378	22672	11691	22357	27343	19759	21647	21678	16769	17247	26825	60560	30676	20141	14118	4957	27401	3528	17032	18374	12067	24717	20591	5629	69061	31478	22122	26638	17521	16708	27815	18166	5282	27722	22493	12807	3994	17713
glutamic acid	527086	246	16576	85:245.0 86:295.0 87:285.0 98:79.0 99:61.0 100:2357.0 101:271.0 102:77.0 103:118.0 105:365.0 107:114.0 110:281.0 112:55.0 113:180.0 114:317.0 115:763.0 116:106.0 117:121.0 125:9.0 128:4331.0 129:826.0 130:261.0 131:512.0 132:247.0 133:612.0 134:292.0 135:8.0 140:608.0 143:126.0 144:21.0 147:8471.0 148:873.0 149:1072.0 150:66.0 151:2.0 152:5.0 153:24.0 154:34.0 155:50.0 156:2334.0 157:559.0 158:59…	33032	C00025	WHUUTDBJXJRKMK-VKHMYHEASA-N	0.99	1	110244	356659	130293	468922	582444	138056	253006	698982	270194	262399	217210	222523	245895	489338	111616	221951	243285	146625	233333	224498	281679	209389	81538	299304	274097	188033	313896	428919	132451	161337	64210	135866	94983	306340	156015	207786	562436	1672273	81975	104884
glucuronic acid	665901	333	344793	96:183.0 101:343.0 104:391.0 105:404.0 114:173.0 116:299.0 118:199.0 129:212.0 131:935.0 133:2270.0 140:93.0 142:73.0 143:1502.0 145:268.0 147:12395.0 148:991.0 149:975.0 157:922.0 158:137.0 160:9222.0 161:1178.0 163:298.0 169:69.0 184:291.0 189:2493.0 191:243.0 192:148.0 200:124.0 201:100.0 203:144.0 204:559.0 205:544.0 206:869.0 215:56.0 216:211.0 217:2377.0 218:761.0 219:1170.0 220:242.0 224:4…	94715	C00191	AEMOLEFTQBMNLQ-AQKNRBDQSA-N	0.91	0.88	13212	219083	13805	13249	6703	30134	5340	7524	4286	5224	7972	61477	3824	31681	13088	4538	2999	9767	10717	6351	3607	7336	4338	7421	2998	11927	40935	3881	7443	5429	4016	2206	4845	42815	4097	133148	5593	1658	6889	4003
glucose-1-phosphate	594647	217	3167	85:385.0 86:98.0 87:248.0 88:286.0 89:468.0 90:224.0 92:20.0 95:218.0 99:284.0 101:1180.0 103:1916.0 104:47.0 107:220.0 109:96.0 110:193.0 111:260.0 112:20.0 113:386.0 114:41.0 115:209.0 116:863.0 117:2309.0 118:189.0 119:243.0 125:12.0 126:151.0 128:127.0 129:1571.0 130:306.0 131:508.0 132:123.0 133:2331.0 134:352.0 135:130.0 136:1.0 139:40.0 140:858.0 141:105.0 142:138.0 143:915.0 144:125.0 145…	65533	C00103	HXXFSFRBOHSIMQ-VFUOTHLCSA-N	0.14	0.01	4618	1939	3182	2646	1671	2567	2436	3023	2326	1925	2169	2601	3556	2078	2566	2585	1278	2260	1660	2565	2170	2400	1373	2470	3231	1545	3238	2890	3868	2675	3581	2719	4692	2390	1365	2977	5040	1320	5346	2591
glucose	659798	319	22	85:955.0 86:739.0 87:1963.0 88:1249.0 89:23654.0 90:1741.0 91:1135.0 94:110.0 95:64.0 96:681.0 97:924.0 98:177.0 99:1302.0 100:4269.0 101:5985.0 102:2628.0 103:55876.0 104:5298.0 105:6003.0 106:471.0 107:134.0 108:44.0 109:106.0 110:151.0 111:715.0 112:295.0 113:1157.0 114:1065.0 115:1902.0 116:1693.0 117:24869.0 118:2407.0 119:3013.0 120:325.0 121:179.0 122:26.0 125:71.0 126:224.0 127:784.0 128:…	64689	C00221	WQZGKKKJIJFFOK-VFUOTHLCSA-N	0.95	0.91	194635	96519	44456	92585	38262	75308	78139	21091	212517	23144	39176	63851	45460	159810	111547	42447	23718	25514	50504	46414	56699	50817	34321	34994	34124	97636	69603	23067	84225	52007	54440	53048	128227	46067	17189	44555	3192504	96612	41594	30392
gluconic acid	693148	333	7501	87:39.0 89:155.0 99:15.0 100:306.0 101:268.0 102:393.0 103:2729.0 104:264.0 105:196.0 109:2.0 111:2.0 113:144.0 116:8.0 117:1117.0 118:12.0 127:30.0 129:1186.0 130:285.0 131:546.0 132:183.0 133:997.0 134:13.0 137:1.0 139:7.0 140:38.0 141:4.0 142:28.0 143:746.0 144:263.0 145:25.0 147:6161.0 148:1144.0 149:642.0 150:39.0 151:46.0 153:74.0 154:66.0 155:3.0 157:599.0 159:89.0 160:27.0 161:88.0 164:14…	6857417	C00800	RGHNJXZEOKUKBD-QTBDOELSSA-N	0.25	0.16	853	443	377	627	302	336	217	232	556	248	427	288	621	1439	218	296	419	170	309	454	113	254	256	121	498	618	458	263	450	376	387	167	720	272	210	171	1257	633	606	92
glucoheptulose	828606	217	3191	85:139.0 86:13.0 89:1593.0 91:2.0 94:55.0 97:1692.0 98:126.0 99:121.0 100:313.0 101:365.0 103:5867.0 104:480.0 105:349.0 109:19.0 111:2.0 114:1800.0 115:154.0 116:242.0 117:2040.0 118:246.0 119:195.0 120:35.0 122:30.0 128:61.0 129:1591.0 130:174.0 131:183.0 133:1318.0 134:156.0 136:15.0 141:68.0 142:187.0 143:391.0 144:75.0 147:6372.0 148:889.0 149:623.0 152:13.0 154:11.0 156:61.0 157:517.0 158:1…	5459879	C02076	HSNZZMHEPUFJNZ-SHUUEZRQSA-N	0.49	0	7315	550	4785	1073	3276	857	6147	2156	1454	634	2482	1488	1376	1640	1021	3169	323	616	1518	1439	706	731	2452	3180	1593	656	601	3229	698	6294	4660	6538	8351	882	552	763	852	109	5531	706
galacturonic acid	669400	333	131445	85:1361.0 86:2529.0 88:750.0 89:21261.0 90:1552.0 91:867.0 92:119.0 93:210.0 94:209.0 95:161.0 98:431.0 99:2655.0 100:2868.0 101:4337.0 102:5377.0 103:12489.0 104:1477.0 105:12704.0 106:1273.0 107:408.0 109:208.0 110:156.0 111:792.0 112:799.0 113:1649.0 114:4067.0 115:3182.0 116:3013.0 117:3204.0 118:790.0 119:2407.0 120:446.0 121:317.0 122:92.0 125:201.0 126:859.0 127:1358.0 128:1637.0 129:8961.…	441476	C08348	AEMOLEFTQBMNLQ-DTEWXJGMSA-N	0.53	0	108015	6138	160881	75095	12615	6791	56441	74177	14591	33789	6329	62694	20066	86661	10927	13451	4696	2479	12098	43411	8998	40440	4681	20627	18546	115733	4488	18899	42281	22982	22714	16764	3161	5807	26238	4887	9196	1078	20137	7007
galactinol	1048207	204	3164	85:504.0 87:206.0 88:67.0 89:595.0 90:16.0 94:20.0 95:26.0 97:180.0 98:69.0 99:428.0 100:134.0 101:2639.0 102:391.0 103:16711.0 104:1541.0 105:703.0 109:557.0 111:94.0 113:493.0 114:136.0 115:758.0 116:1036.0 117:3841.0 118:364.0 119:475.0 125:62.0 127:358.0 128:9.0 129:17159.0 130:1889.0 131:3123.0 132:308.0 133:2849.0 134:279.0 135:300.0 136:52.0 137:9.0 139:170.0 140:57.0 141:234.0 142:301.0 1…	11727586	C01235	VCWMRQDBPZKXKG-ZNVDUFQESA-N	0.3	0	2295	1601	2601	1176	670	1022	1374	1297	1295	540	1464	1414	1972	1208	1257	2429	709	675	2158	2141	999	1454	509	1145	1292	1382	3651	1090	1453	1296	1798	2182	4122	1080	962	3334	43039	573	2609	708
fumaric acid	390775	245	1718	85:548.0 86:69.0 87:80.0 91:65.0 95:3.0 98:3.0 99:1019.0 100:367.0 101:132.0 102:16.0 106:51.0 108:90.0 109:6.0 110:342.0 111:15.0 112:22.0 113:317.0 114:50.0 115:339.0 117:96.0 118:146.0 123:15.0 124:26.0 126:329.0 128:72.0 130:753.0 131:100.0 132:16.0 133:591.0 135:211.0 136:56.0 140:10.0 141:129.0 142:57.0 143:926.0 144:124.0 146:48.0 147:5175.0 148:610.0 149:671.0 151:31.0 152:3.0 153:7.0 154…	444972	C00122	VZCYOOQTPOCHFL-OWOJBTEDSA-N	0.94	0.83	11737	13771	9658	12129	3216	7215	6314	6057	3245	3268	4236	6059	4671	10414	5901	4863	2542	4897	9072	4807	3128	4324	3157	7673	4346	4314	13423	6066	7848	7375	4254	4527	8023	7471	4479	8274	2418	3398	7493	1110
fucose	578299	160	3009	85:191.0 89:328.0 91:5.0 98:6.0 100:250.0 101:182.0 103:132.0 105:64.0 107:33.0 117:5349.0 118:423.0 119:197.0 127:28.0 129:429.0 130:344.0 131:248.0 133:363.0 134:138.0 143:112.0 147:658.0 148:60.0 159:12.0 160:926.0 161:309.0 162:4.0 171:31.0 174:36.0 189:39.0 191:27.0 204:79.0 205:9.0 206:19.0 217:28.0 219:124.0 223:10.0 231:37.0 233:151.0 235:13.0 277:238.0 278:54.0 293:13.0 299:12.0 321:80.0…	439650	C02095	SHZGCJCMOBCMKK-FPRJBGLDSA-N	0.97	0.33	118768	86213	74210	34928	92363	53142	61710	142858	80266	46059	55956	147004	41836	131963	36841	46472	29969	37710	43185	171043	110456	194151	82538	108535	101934	64542	39373	57954	233388	118251	266895	31320	308446	58146	30655	128540	31528	37284	259028	26945
fructose	641863	307	50366	86:65.0 87:79.0 88:18.0 89:2281.0 90:143.0 99:37.0 100:388.0 101:537.0 102:77.0 103:13851.0 104:1258.0 105:563.0 113:20.0 114:164.0 115:201.0 117:1833.0 118:120.0 119:138.0 122:14.0 125:109.0 128:143.0 129:782.0 130:84.0 131:499.0 133:1810.0 134:211.0 135:10.0 136:17.0 142:22.0 143:105.0 145:56.0 147:4583.0 148:705.0 149:481.0 150:25.0 151:26.0 156:27.0 157:146.0 159:19.0 163:118.0 167:3.0 171:41…	439709	C02336	RFSUNEUAIZKAJO-ARQDHWQXSA-N	0.99	0.96	6126	949	942	2442	1600	1783	4730	788	3044	2980	1036	2374	1086	2570	1663	1681	1704	796	2656	3644	2424	2512	1452	4298	4744	652	1113	1375	4330	1437	486	2660	1755	3018	1031	1987	4170	1510	1837	1502
ferulic acid	732779	338	14814	85:35.0 86:52.0 87:36.0 88:252.0 89:926.0 90:120.0 91:235.0 92:43.0 93:27.0 94:29.0 95:40.0 97:6.0 98:21.0 99:29.0 101:30.0 102:222.0 103:196.0 104:38.0 105:67.0 106:8.0 107:131.0 109:38.0 110:53.0 111:14.0 112:24.0 114:2.0 115:318.0 116:103.0 117:412.0 118:150.0 119:161.0 120:2.0 121:50.0 122:3.0 123:12.0 125:13.0 126:30.0 127:39.0 128:15.0 129:111.0 130:123.0 131:114.0 132:24.0 133:221.0 134:13…	445858	C01494	KSEBMYQBYZTDHS-HWKANZROSA-N	0.33	0	3269	797	4701	1888	1282	167	2646	1493	1019	2832	720	729	2132	1821	1292	1035	685	970	1456	1181	860	1940	530	1338	1365	1528	628	1275	3384	1409	2242	5624	1687	780	524	857	240	117	2037	1050
ethanolamine	343800	174	45341	85:17544.0 86:175868.0 87:37978.0 88:16848.0 89:41209.0 90:4709.0 91:10643.0 92:1773.0 93:2745.0 94:638.0 95:902.0 96:1260.0 97:1477.0 98:2978.0 99:7231.0 100:169810.0 101:52380.0 102:24044.0 103:172854.0 104:24239.0 105:38562.0 106:5669.0 107:15911.0 108:1840.0 109:5126.0 110:2504.0 111:841.0 112:951.0 113:9857.0 114:19793.0 115:72673.0 116:28088.0 117:182126.0 118:22232.0 119:55318.0 120:8272.0…	700	C00189	HZAXFHJVJLSVMW-UHFFFAOYSA-N	0.35	0	98779	67931	80929	62606	196843	56120	115385	120485	56980	65234	99860	57293	59371	99183	41574	101361	40274	48169	79628	68706	53872	107301	25449	66389	29289	72130	34132	110861	122459	188898	130309	100739	75379	50259	19509	57357	28710	76466	127220	46959
erythrose	443306	205	102661	85:252.0 86:309.0 87:286.0 88:262.0 89:3396.0 90:347.0 98:95.0 99:207.0 100:1047.0 101:1152.0 102:512.0 103:2966.0 104:321.0 105:570.0 111:37.0 112:126.0 113:92.0 114:259.0 115:522.0 116:243.0 117:8801.0 118:811.0 119:677.0 120:43.0 121:19.0 125:24.0 126:85.0 127:101.0 128:90.0 129:712.0 130:1223.0 131:821.0 132:198.0 133:2835.0 134:401.0 135:233.0 140:40.0 141:30.0 142:111.0 143:111.0 144:41.0 1…	439574	C01796	FMAORJIQYMIRHF-HERZVMAMSA-N	0.11	0.13	1145	487	581	721	245	727	651	493	1190	697	1408	444	577	405	971	743	442	522	1158	445	526	575	367	815	505	373	1857	899	809	658	627	549	1876	1164	513	1178	686	488	797	439
erythritol	471922	217	92	86:57.0 87:443.0 89:682.0 90:92.0 99:480.0 100:41.0 101:1823.0 103:7046.0 104:676.0 105:300.0 106:59.0 109:27.0 111:45.0 113:474.0 115:473.0 116:1861.0 117:6123.0 118:476.0 119:295.0 127:453.0 129:1559.0 130:129.0 131:448.0 133:1902.0 134:216.0 144:53.0 147:9776.0 148:785.0 149:656.0 158:25.0 159:8.0 163:98.0 169:60.0 174:40.0 175:153.0 176:58.0 177:60.0 183:21.0 189:1255.0 190:194.0 191:893.0 19…	222285	C00503	UNXHWFMMPAWVPI-ZXZARUISSA-N	0.67	0.76	45745	1760	50084	6177	22748	1436	39032	13924	932	481	661	672	30107	6163	470	23407	551	430	510	13002	892	570	393	6920	1031	786	1031	22538	7244	22683	48435	45677	77442	3033	912	761	6973	14583	56696	470
epsilon-caprolactam	353069	170	3101	85:3527.0 86:4140.0 87:584.0 88:310.0 89:178.0 90:77.0 92:69.0 93:133.0 94:788.0 95:1631.0 96:9852.0 97:922.0 98:563.0 99:1266.0 100:3522.0 101:560.0 102:1140.0 104:121.0 108:40.0 109:61.0 110:210.0 111:195.0 112:430.0 113:668.0 114:248.0 115:442.0 116:2077.0 117:158.0 118:177.0 119:56.0 121:27.0 124:57.0 125:76.0 126:242.0 127:629.0 128:1076.0 129:519.0 131:354.0 135:55.0 137:46.0 138:80.0 139:6…	7768	C06593	JBKVHLHDHHXQEQ-UHFFFAOYSA-N	0.34	0.25	920	2337	3303	1126	402	1434	1195	897	641	6195	2693	3899	1682	952	5654	1499	2667	462	6858	3188	1380	7402	308	6479	1851	1232	6043	1602	2563	924	3712	530	1752	1334	2136	1661	766	3229	3860	2740
docosahexaenoic acid	902819	91	87709	89:153.0 91:4417.0 92:909.0 93:2453.0 94:871.0 95:942.0 96:135.0 97:156.0 98:30.0 99:74.0 103:158.0 104:148.0 105:1782.0 106:442.0 107:727.0 108:775.0 109:294.0 110:46.0 111:42.0 115:239.0 116:175.0 117:1938.0 118:276.0 119:1453.0 120:408.0 121:401.0 122:154.0 123:56.0 128:107.0 129:1147.0 130:243.0 131:1109.0 132:276.0 133:714.0 134:388.0 135:292.0 136:81.0 137:51.0 141:89.0 142:64.0 143:202.0 1…	445580	C06429	MBMBGCFOFBJSGT-KUBAVDMBSA-N	0.54	0.95	5769	29241	4414	8581	5692	11513	4666	3255	6625	7191	3271	15081	4544	7546	8920	3271	13698	14521	16651	6236	7603	7186	2617	3957	17123	20251	50264	3936	7101	6419	3151	1318	4483	24547	8608	4355	846	971	3913	11285
dihydrocholesterol	1082070	215	42937	85:915.0 86:94.0 87:34.0 89:485.0 91:4176.0 92:787.0 93:4869.0 94:1228.0 95:5414.0 96:299.0 97:914.0 98:121.0 99:603.0 100:190.0 101:817.0 103:357.0 104:284.0 105:3131.0 106:3045.0 107:4872.0 108:1660.0 109:2455.0 110:512.0 111:1052.0 112:39.0 113:254.0 115:321.0 116:86.0 117:909.0 118:257.0 119:2448.0 120:1216.0 121:2904.0 122:777.0 123:1040.0 124:179.0 125:446.0 128:124.0 129:1634.0 130:938.0 1…	66066	C12978	QYIXCDOBOSTCEI-FBVYSKEZSA-N	0.15	0.05	1024	1633	793	604	544	1435	578	504	476	513	487	1513	612	929	643	544	325	792	185	1078	801	535	284	158	49	772	243	790	455	636	613	821	539	1189	406	1652	261	134	2821	699
dihydro-3-coumaric acid	582960	192	384891	85:6652.0 86:1183.0 89:25089.0 90:7183.0 92:2449.0 94:1610.0 95:11242.0 99:2823.0 100:3400.0 101:5397.0 102:9116.0 103:30006.0 104:7900.0 105:36716.0 106:3271.0 107:992.0 108:431.0 109:2781.0 113:795.0 115:14122.0 116:5401.0 117:72622.0 118:8301.0 119:9858.0 120:2712.0 121:6202.0 122:325.0 123:1296.0 127:2337.0 128:2864.0 129:10632.0 130:3262.0 131:18239.0 132:2511.0 133:18972.0 134:3697.0 135:20…	91	C11457	QVWAEZJXDYOKEH-UHFFFAOYSA-N	0.48	0.15	1034	11025	4745	81792	170228	342495	151527	327523	479082	350573	372487	325214	104175	37272	520975	213094	402403	160320	240556	203234	335799	431671	259525	489223	477858	480596	124009	441786	313650	11764	1493	1943	59575	212664	216108	260854	392	339	0	525874
D-erythro-sphingosine	859500	204	126903	100:421.0 114:218.0 116:303.0 128:133.0 129:310.0 130:24.0 147:380.0 155:21.0 188:166.0 202:115.0 204:5513.0 205:732.0 206:427.0 223:20.0 345:29.0	5280335	C00319	WWUZIQQURGPMPG-KRWOKUGFSA-N	0.87	0	16038	78015	13534	47022	78286	22458	24949	15766	13274	20848	6366	16849	20838	13414	5356	6510	32031	12550	8471	13420	75092	6462	4656	8019	23676	53172	30634	11722	30950	30249	29831	16539	4142	16388	13556	108628	4975	16677	5195	9230
deoxypentitol	528774	231	33037	87:25.0 89:344.0 90:21.0 101:747.0 102:136.0 103:1141.0 104:17.0 105:123.0 111:54.0 113:68.0 114:9.0 115:1403.0 117:1187.0 118:109.0 119:126.0 128:82.0 129:1844.0 130:246.0 131:413.0 132:69.0 133:945.0 134:35.0 135:18.0 140:208.0 141:182.0 142:167.0 144:282.0 145:197.0 147:3278.0 148:300.0 149:544.0 151:15.0 155:310.0 156:93.0 157:179.0 158:52.0 159:66.0 163:39.0 164:96.0 165:2.0 171:3.0 172:76.0…	270738		FJGNTEKSQVNVTJ-UHFFFAOYSA-N	0.23	0.01	1521	8535	2099	3947	1162	2478	1951	1083	2497	7017	1171	4868	1235	9023	2743	1287	4962	1270	2688	1895	1999	2241	268	2447	5177	1968	7446	748	2673	1698	1431	675	1312	4348	2450	3624	9595	1526	1108	3593
deoxycholic acid	1107794	255	95409	87:8.0 91:345.0 93:504.0 94:20.0 95:244.0 98:5.0 101:27.0 105:425.0 106:15.0 107:360.0 109:157.0 115:7.0 116:102.0 117:450.0 118:80.0 119:312.0 120:48.0 121:120.0 122:56.0 128:62.0 129:431.0 131:503.0 132:70.0 133:109.0 134:3.0 140:8.0 142:35.0 143:126.0 145:290.0 146:46.0 147:132.0 149:155.0 155:35.0 157:109.0 159:185.0 160:38.0 161:97.0 163:94.0 167:10.0 171:67.0 173:182.0 175:48.0 176:34.0 177…	222528	C04483	KXGVEGMKQFWNSR-LLQZFEROSA-N	1	0.21	363617	1255345	313959	413960	274337	1174593	138656	233331	290087	135698	308243	1616585	182882	26184	420493	96887	230659	157907	284161	251089	167201	146530	105697	135527	185584	477165	688646	183708	154702	250466	1089375	484687	427147	541763	153344	1545189	5691	35384	319963	278145
daidzein	1013259	398	115854	88:418.0 89:2048.0 90:422.0 91:1774.0 93:588.0 94:218.0 95:506.0 98:126.0 99:106.0 100:61.0 101:497.0 102:129.0 105:469.0 107:338.0 108:179.0 109:180.0 111:379.0 112:23.0 113:149.0 114:101.0 115:2219.0 117:592.0 118:164.0 119:1360.0 120:245.0 121:680.0 123:14.0 124:76.0 125:177.0 128:41.0 132:354.0 133:410.0 134:45.0 135:845.0 137:337.0 139:376.0 141:219.0 145:844.0 146:246.0 147:3151.0 149:1208.…	5281708	C10208	ZQSIJRDFPHDXIC-UHFFFAOYSA-N	0.18	0	907	436	921	1071	211	373	676	439	257	150	126	458	511	336	366	193	664	267	283	766	168	263	101	354	505	662	534	494	484	587	690	735	911	669	327	391	73	27	1843	378
cytosine	486724	254	2186	85:305.0 86:945.0 88:631.0 89:66.0 91:93.0 92:12.0 93:60.0 94:50.0 95:688.0 96:493.0 97:996.0 98:12707.0 99:1818.0 100:5096.0 101:1193.0 102:433.0 103:101.0 104:99.0 105:431.0 106:204.0 107:67.0 108:20.0 109:92.0 110:178.0 111:229.0 112:504.0 113:1713.0 114:980.0 115:589.0 116:686.0 117:327.0 118:47.0 120:75.0 123:207.0 124:149.0 125:2555.0 126:219.0 127:121.0 128:47.0 129:459.0 130:1719.0 131:51…	597	C00380	OPTASPLRGRRNAP-UHFFFAOYSA-N	0.48	0.01	2310	8293	3777	5507	4916	4383	1189	3135	3226	2769	1677	62	1720	8885	3407	488	4363	3862	5325	2262	2063	3843	1723	1199	5176	2353	669	752	2052	935	1443	959	2469	2783	2723	2346	454	630	234	1901
cytidine	934269	223	137364	86:146.0 94:21.0 95:87.0 97:71.0 98:385.0 100:784.0 101:421.0 102:105.0 103:633.0 111:31.0 112:64.0 113:120.0 115:88.0 117:263.0 119:64.0 122:57.0 123:33.0 124:21.0 125:172.0 127:78.0 129:396.0 130:61.0 133:470.0 134:55.0 135:45.0 140:41.0 141:67.0 142:46.0 143:139.0 145:99.0 147:1793.0 148:178.0 149:45.0 151:48.0 152:91.0 153:72.0 163:25.0 166:62.0 167:349.0 168:863.0 169:407.0 170:222.0 172:17.…	6175		UHDGCWIWMRVCDJ-XVFCMESISA-N	0.16	0.05	1634	1549	126	792	555	540	318	297	829	265	690	303	489	1404	486	489	228	936	320	73	386	1292	436	564	568	1673	348	788	1861	1152	947	446	460	1187	224	2078	131	79	398	1936
cystine	804619	218	94	85:108.0 86:247.0 87:139.0 88:76.0 89:69.0 91:149.0 92:44.0 93:30.0 95:38.0 98:79.0 99:84.0 100:3048.0 101:429.0 102:207.0 103:131.0 104:31.0 109:39.0 111:37.0 114:248.0 115:750.0 116:370.0 117:152.0 118:99.0 119:32.0 120:118.0 121:41.0 122:20.0 128:86.0 129:101.0 130:257.0 131:402.0 132:617.0 133:343.0 134:123.0 135:57.0 143:27.0 144:115.0 145:43.0 146:3584.0 147:1813.0 148:1380.0 149:261.0 156:…	595	C01420	LEVWYRKDKASIDU-UHFFFAOYSA-N	0.11	1	1752	701	564	534	241	460	548	489	646	749	1545	630	425	2509	603	2177	225	387	1018	1219	355	782	1346	629	298	836	839	727	844	373	1333	537	1359	892	263	691	2767	530	2125	536
cysteine	500158	220	65	86:175.0 90:83.0 91:341.0 97:81.0 98:68.0 100:3118.0 101:289.0 102:126.0 103:157.0 104:40.0 106:71.0 111:61.0 112:46.0 113:48.0 115:193.0 116:681.0 117:121.0 119:107.0 120:61.0 130:238.0 132:808.0 133:307.0 135:39.0 146:182.0 147:1274.0 149:187.0 163:84.0 172:22.0 204:108.0 217:15.0 218:2544.0 219:362.0 220:2803.0 221:383.0 222:297.0 223:28.0 231:29.0 232:38.0 262:21.0 287:23.0 301:27.0 304:25.0 …	5862	C00097	XUJNEKJLAYXESH-REOHCLBHSA-N	0.33	0.84	11479	1031	1391	203	145	174	709	129	4954	2396	5249	2564	1717	492	6461	2385	262	100	446	6205	428	1327	3335	2100	1054	121	2385	1435	2605	10837	574	186	380	2226	3259	490	1062	827	1088	428
creatinine	502599	115	31	85:370.0 88:85.0 89:36.0 93:61.0 98:181.0 99:1414.0 100:9158.0 101:1232.0 103:128.0 108:34.0 111:15.0 113:594.0 114:567.0 115:27718.0 116:1868.0 118:47.0 124:34.0 130:931.0 134:91.0 135:38.0 136:59.0 139:101.0 142:85.0 143:10910.0 144:1070.0 147:1641.0 155:268.0 158:453.0 159:92.0 160:80.0 161:20.0 162:30.0 165:17.0 167:15.0 169:18.0 170:66.0 171:2993.0 172:140.0 173:285.0 174:113.0 175:26.0 176:…	588	C00791	DDRJAANPRJIHGJ-UHFFFAOYSA-N	0.8	0.95	192308	1181	42032	9340	9200	1456	30173	3118	8364	1041	4742	486	10187	257	1676	4735	1320	946	5683	3904	1687	5396	12140	1812	2437	1973	2958	3435	3001	18155	237532	74710	157772	9276	1003	1542	246844	22873	38279	3057
conduritol-beta-epoxide	674080	129	161843	85:1974.0 86:458.0 87:1523.0 88:478.0 89:2570.0 90:298.0 91:415.0 92:303.0 93:7195.0 94:746.0 95:3791.0 96:1019.0 97:1027.0 98:325.0 99:1470.0 101:4753.0 102:927.0 103:33359.0 104:2866.0 105:2137.0 107:377.0 108:210.0 109:2412.0 110:311.0 111:1726.0 112:287.0 113:2297.0 114:396.0 115:2252.0 116:1401.0 117:4893.0 118:980.0 119:1597.0 120:80.0 121:364.0 122:33.0 123:965.0 124:233.0 125:916.0 126:66…	119054		ZHMWOVGZCINIHW-SPHYCDKFSA-N	0.2	0.21	22231	21879	9968	16879	14110	14887	14320	12542	18077	10922	7869	13492	18004	14747	12714	8606	9614	12253	16000	14933	17925	17669	6264	12532	12736	17338	15850	19835	27648	20753	11336	10593	11591	17031	5004	16681	73899	10902	11601	19763
citrulline	621404	157	1712	85:138.0 86:318.0 89:143.0 90:82.0 91:114.0 92:81.0 95:62.0 97:103.0 98:473.0 99:700.0 100:1254.0 101:216.0 102:109.0 103:52.0 104:50.0 107:195.0 108:36.0 109:94.0 110:101.0 111:43.0 113:64.0 114:128.0 115:311.0 116:35.0 117:38.0 118:54.0 120:48.0 122:24.0 124:39.0 126:87.0 127:262.0 128:173.0 129:140.0 130:668.0 132:139.0 133:229.0 134:91.0 138:26.0 140:306.0 141:1077.0 142:2134.0 143:284.0 144:…	9750	C00327	RHGKLRLOHDJJDR-BYPYZUCNSA-N	0.53	0.99	13452	21305	12377	14803	12528	22312	10980	8559	18554	16529	17971	12897	9812	28747	18628	9700	13807	18453	22119	9680	15786	15137	12886	13420	16482	11901	17044	11846	15146	9086	13920	9892	17626	18218	15287	18897	27788	11358	11361	16579
citric acid	617342	273	288	85:108.0 87:167.0 88:92.0 89:136.0 92:58.0 93:86.0 95:193.0 96:108.0 97:78.0 99:605.0 100:143.0 101:223.0 102:92.0 103:336.0 104:70.0 105:58.0 109:24.0 110:55.0 111:256.0 112:15.0 114:87.0 115:639.0 116:312.0 117:522.0 118:105.0 119:62.0 120:32.0 124:17.0 125:53.0 126:49.0 127:177.0 128:22.0 129:915.0 131:952.0 132:92.0 133:1929.0 134:60.0 135:258.0 136:35.0 137:44.0 139:90.0 140:83.0 141:331.0 1…	311	C00158	KRKNYBCHXYNGOX-UHFFFAOYSA-N	0.13	0.96	1425	1293	698	599	374	474	613	614	1233	1050	587	279	1092	12870	444	600	330	789	808	340	890	575	458	961	380	608	538	884	2944	1038	484	955	1261	861	113	501	4467	328	4839	759
cis-gondoic acid	847372	367	87783	85:2318.0 89:1537.0 91:1953.0 92:494.0 93:1867.0 94:1814.0 95:6984.0 96:10449.0 97:6552.0 98:6703.0 99:1435.0 105:1710.0 106:308.0 107:1454.0 108:883.0 109:3479.0 110:3575.0 111:2492.0 112:1073.0 113:314.0 117:29549.0 118:2998.0 119:2252.0 120:341.0 121:1361.0 122:447.0 123:2047.0 124:1355.0 125:876.0 126:132.0 127:401.0 129:20607.0 130:2301.0 131:4009.0 132:4647.0 133:2381.0 134:1003.0 135:968.0…	5282768	C16526	BITHHVVYSMSWAG-KTKRTIGZSA-N	0.2	0.05	491	701	368	351	222	331	178	168	322	475	442	67	910	365	277	244	216	542	762	200	242	496	141	249	343	688	1551	248	336	298	151	188	148	565	203	340	265	676	128	427
cis-10-heptadecenoic acid	742967	129	87713	85:236.0 86:107.0 88:41.0 91:222.0 93:503.0 95:903.0 96:1645.0 97:918.0 98:1295.0 99:246.0 105:210.0 107:81.0 109:458.0 110:548.0 111:194.0 112:173.0 115:48.0 116:452.0 117:5957.0 118:392.0 119:221.0 120:80.0 121:123.0 122:60.0 123:277.0 124:269.0 125:183.0 128:71.0 129:4481.0 130:531.0 131:913.0 132:728.0 133:258.0 134:123.0 135:142.0 136:34.0 137:145.0 138:96.0 139:54.0 142:38.0 143:200.0 145:1…	5312435		GDTXICBNEOEPAZ-FPLPWBNLSA-N	0.06	0.59	8953	3977	8107	4270	4449	3164	5967	3357	3802	3017	2265	2487	6977	3926	3027	2791	2500	4286	4521	4435	5631	5465	1961	28790	3778	5768	5599	5133	8718	9093	3768	2913	7780	3736	1311	3036	1613	17617	4627	3937
cholic acid	1108715	253	365344	85:5196.0 86:876.0 87:944.0 88:599.0 89:2527.0 90:818.0 91:17795.0 92:2501.0 93:15991.0 94:3165.0 95:12810.0 96:1311.0 97:2084.0 98:395.0 99:1343.0 100:248.0 101:4530.0 102:1044.0 103:5390.0 104:965.0 105:17817.0 106:3090.0 107:12541.0 108:1727.0 109:6095.0 110:671.0 111:1212.0 112:248.0 113:1617.0 114:331.0 115:4463.0 116:5883.0 117:23327.0 118:3739.0 119:11641.0 120:2018.0 121:6544.0 122:1299.0…	221493	C00695	BHQCQFFYRZLCQQ-OELDTZBJSA-N	0.91	0.18	2576	40725	4588	1836	20597	9130	13544	4125	9133	2543	1991	10046	11761	2588	8390	6204	2197	1864	3264	3564	10748	2548	1278	17379	3146	4137	123743	6712	13910	4020	89646	549531	3418	7970	2983	69611	23025	6881	2238	2645
cholesterol	1078536	129	19	85:3277.0 86:357.0 87:698.0 88:331.0 89:2173.0 90:402.0 91:29340.0 92:4360.0 93:20764.0 94:3772.0 95:27816.0 96:2369.0 97:5814.0 98:576.0 99:1514.0 100:67.0 101:2755.0 102:616.0 103:3141.0 104:1732.0 105:26895.0 106:4885.0 107:20090.0 108:3742.0 109:12657.0 110:1522.0 111:3689.0 112:263.0 113:906.0 114:11.0 115:5342.0 116:2555.0 117:9801.0 118:2755.0 119:20567.0 120:8989.0 121:16634.0 122:2141.0 …	5997	C00187	HVYWMOMLDIMFJA-DPAQBDIFSA-N	0.99	1	41090	67272	36865	39310	41376	71401	26069	27175	25663	32296	25044	69505	27126	45134	25319	26100	25892	56079	77794	48257	43854	30510	16119	34562	36319	66773	65559	37082	25404	40076	39135	51689	34407	64816	23156	158755	45693	21204	113056	44877
chenodeoxycholic acid	1114867	255	104361	85:6651.0 86:1341.0 88:1179.0 89:5004.0 90:918.0 91:38728.0 92:6733.0 93:52484.0 94:12378.0 95:48804.0 96:3708.0 97:4202.0 98:989.0 99:2877.0 100:205.0 101:10363.0 102:1883.0 103:9068.0 104:1731.0 105:48295.0 106:10513.0 107:45502.0 108:8796.0 109:20093.0 110:3001.0 111:4102.0 112:972.0 113:4189.0 114:610.0 115:9575.0 116:13187.0 117:81513.0 118:12627.0 119:35456.0 120:7967.0 121:29263.0 122:7133…	10133	C02528	RUDATBOHQWOJDD-BSWAIDMHSA-N	0.37	0.01	5265	11653	6134	3821	8541	7901	12307	4081	3270	3098	2412	16860	6873	2573	3802	6635	2219	3046	3469	8398	8818	4345	2782	12337	2885	4802	20146	10110	4978	6452	14832	64762	3677	8338	3265	18667	2075	766	6633	2522
cerotinic acid	1033286	145	17982	85:1295.0 86:158.0 88:1.0 89:242.0 91:67.0 93:95.0 95:1309.0 96:191.0 97:1943.0 98:1236.0 99:444.0 101:240.0 102:74.0 104:114.0 105:273.0 106:1.0 108:119.0 109:514.0 111:676.0 112:371.0 113:1.0 114:1.0 115:99.0 116:520.0 117:19706.0 118:1850.0 119:625.0 120:16.0 121:455.0 122:38.0 123:291.0 124:92.0 125:288.0 129:8151.0 130:948.0 131:2365.0 132:8532.0 133:1938.0 134:337.0 135:577.0 136:86.0 137:2…	10469		XMHIUKTWLZUKEX-UHFFFAOYSA-N	0.57	0.01	1948	992	704	591	969	1564	1210	639	596	1071	555	1257	1927	1314	1893	905	552	1526	880	1611	1037	877	256	1582	567	1377	1512	793	720	1336	1713	1039	728	868	216	1309	609	248	1063	900
cellobiose	932179	204	1373	85:169.0 86:40.0 87:224.0 89:1164.0 93:16.0 95:81.0 96:78.0 97:144.0 99:39.0 100:142.0 101:420.0 102:239.0 103:2566.0 104:303.0 105:530.0 107:39.0 108:20.0 113:215.0 114:2.0 115:122.0 116:171.0 117:1882.0 119:55.0 123:25.0 125:56.0 127:215.0 129:1861.0 130:230.0 131:535.0 132:80.0 133:993.0 141:125.0 142:21.0 143:419.0 144:69.0 145:87.0 146:72.0 147:5903.0 148:921.0 149:340.0 155:337.0 156:102.0 …	6255	C01971	GUBGYTABKSRVRQ-QUYVBRFLSA-N	0.16	0.01	19179	3203	9784	11328	3613	4968	12574	2870	10292	2330	6063	1708	7393	3962	29330	8330	7410	1283	5829	1688	4591	8773	3943	12149	12295	6979	1512	6297	14960	8340	11399	22754	1864	1864	3334	1593	12277	1053	1829	3960
campesterol	1105205	129	213180	85:1807.0 86:108.0 87:96.0 89:466.0 90:42.0 91:6310.0 92:939.0 93:4653.0 94:774.0 95:5896.0 96:455.0 97:1559.0 98:136.0 99:338.0 100:50.0 101:563.0 103:707.0 104:260.0 105:5314.0 106:920.0 107:4111.0 108:688.0 109:2300.0 110:281.0 111:626.0 113:136.0 115:935.0 116:346.0 117:1702.0 118:440.0 119:3825.0 120:1697.0 121:3224.0 122:427.0 123:824.0 124:111.0 125:280.0 126:46.0 127:171.0 128:447.0 129:1…	173183	C01789	SGNBVLSWZMBQTH-PODYLUTMSA-N	0.25	0.05	34266	150760	12282	2435	32745	99982	35841	5530	4720	3032	43684	227176	10061	19364	75774	33046	38879	39945	63478	51112	6816	38780	20705	43733	93425	63050	51773	40322	7423	49952	8004	28647	73714	99483	8356	211384	2063	2177	15484	7801
cadaverine	631457	174	1661	85:5066.0 86:90202.0 87:9563.0 88:12245.0 89:1089.0 90:312.0 93:5.0 95:178.0 96:159.0 97:1143.0 98:4199.0 99:4660.0 100:46278.0 101:7513.0 102:10440.0 103:2705.0 104:659.0 105:9.0 106:310.0 108:4.0 109:158.0 110:577.0 111:439.0 112:15199.0 113:4665.0 114:6934.0 115:4758.0 116:7847.0 117:7818.0 118:1746.0 119:419.0 120:50.0 122:56.0 123:104.0 124:1379.0 125:251.0 126:3955.0 127:382.0 128:4739.0 12…	273		VHRGRCVQAFMJIZ-UHFFFAOYSA-N	1	0.04	76121	477390	178937	454157	4004954	1642990	1160121	2022127	1025820	1339236	983026	670164	1265777	84585	1668197	1896331	2388108	3134884	2715368	910999	3751103	3227169	1801978	4637230	2034896	875441	489488	3385356	2273896	1460255	31693	1612351	78415	271188	1277532	910991	64660	523202	152292	3741362
butylamine	245240	174	342044	86:56920.0 87:7197.0 88:16752.0 89:2368.0 90:448.0 91:1504.0 92:288.0 96:557.0 98:278.0 99:1172.0 100:32017.0 101:5705.0 102:5864.0 103:3693.0 104:390.0 105:5521.0 106:1628.0 108:168.0 110:10664.0 112:510.0 114:4580.0 115:3719.0 121:1127.0 122:287.0 123:876.0 124:74.0 126:1201.0 128:44795.0 129:6901.0 130:14133.0 131:4040.0 132:956.0 133:5021.0 134:1010.0 135:2146.0 136:162.0 137:1361.0 138:986.0…	8007		HQABUPZFAYXKJW-UHFFFAOYSA-N	0.65	0.48	48823	38688	26247	29563	16370	31931	24290	18908	26284	15324	31077	4195	22530	29343	21059	19237	15386	40651	30188	42348	19371	29532	15148	18963	23853	40623	28944	27268	13995	56116	26499	21190	36216	12691	8258	44188	25544	12340	38419	24847
butane-2,3-diol	205778	117	485	86:129.0 87:1127.0 88:621.0 94:64.0 101:985.0 102:817.0 103:711.0 104:132.0 105:215.0 106:25.0 110:70.0 113:133.0 115:634.0 116:608.0 117:34024.0 118:3483.0 119:1369.0 120:52.0 125:36.0 127:157.0 129:384.0 131:1115.0 132:285.0 133:2648.0 135:67.0 138:16.0 139:52.0 141:34.0 142:52.0 144:30.0 145:56.0 147:9540.0 148:2021.0 149:1454.0 150:98.0 157:44.0 161:36.0 166:51.0 167:48.0 170:14.0 171:19.0 17…	262	C03046	OWBTYPJTUOEWEK-UHFFFAOYSA-N	0.05	0.18	82240	20537	113226	24468	90689	21109	20053	58308	9925	14467	4843	10757	23384	39240	13050	38025	11558	8452	8734	109112	10234	8691	5860	12899	11199	14234	12840	15376	12703	16383	5763	41757	52070	18549	4104	23694	151869	1057804	271588	6585
biphenyl	426625	154	68719	89:3302.0 97:316.0 107:235.0 124:383.0 136:397.0 137:350.0 139:89.0 152:471.0 154:23828.0 155:316.0 156:3822.0 157:1218.0 174:2709.0 175:157.0 183:108.0 184:13.0 187:110.0 216:13.0 228:376.0 229:264.0 274:94.0 277:19.0 279:11.0 313:1.0 323:3.0 324:4.0 332:5.0 336:1.0 353:1.0 368:1.0 398:3.0 403:2.0 405:7.0 407:4.0 418:2.0 421:5.0 424:3.0 425:11.0 427:3.0 431:2.0 438:6.0 440:3.0 442:4.0 445:1.0 44…	7095	C06588	ZUOUZKKEUPVFJK-UHFFFAOYSA-N	0.19	0	10236	13399	11835	7832	4779	9874	12180	9130	7361	9247	6423	9980	12086	6775	15398	8648	4641	9852	10473	8390	8572	9022	4125	10446	9446	7725	11343	14536	13285	10898	7409	5511	12646	11064	7350	3596	1522	991	11475	10100
beta-sitosterol	1128225	129	3174	85:2766.0 86:101.0 87:57.0 89:458.0 91:5648.0 92:1009.0 93:4837.0 94:854.0 95:7005.0 96:398.0 97:1583.0 98:69.0 99:841.0 101:529.0 102:39.0 103:648.0 104:289.0 105:5798.0 106:1007.0 107:5082.0 108:945.0 109:3381.0 110:296.0 111:1228.0 112:109.0 113:310.0 114:25.0 115:1041.0 116:430.0 117:2402.0 118:725.0 119:4929.0 120:2342.0 121:4665.0 122:692.0 123:1370.0 124:121.0 125:512.0 127:195.0 128:627.0…	222284	C01753	KZJWDPNRJALLNS-VJSFXXLFSA-N	0.91	0	33939	17738	30400	13721	1011	39650	10309	10676	12331	9039	2549	9881	13195	16958	16399	11139	5014	12978	67722	23266	9773	9402	3855	6845	8986	1478	14291	21902	8687	16567	23800	38678	13147	15537	9462	9059	5479	3631	112418	17428
beta-glycerolphosphate	574470	243	22021	85:37.0 101:553.0 102:50.0 103:684.0 106:24.0 112:8.0 113:19.0 115:137.0 117:69.0 129:971.0 130:171.0 131:352.0 133:740.0 134:41.0 135:156.0 137:89.0 139:3.0 147:979.0 148:10.0 149:98.0 155:36.0 179:29.0 181:96.0 183:49.0 191:186.0 192:18.0 193:100.0 195:81.0 207:280.0 208:22.0 209:15.0 211:1590.0 212:184.0 213:144.0 217:86.0 218:77.0 225:19.0 227:200.0 228:29.0 234:34.0 243:1830.0 244:286.0 245:…	2526	C02979	DHCLVCXQIBBOPH-UHFFFAOYSA-N	0.22	0.86	2493	457	1733	1402	1069	357	1757	1607	513	388	513	190	904	554	703	1123	318	482	378	453	322	379	199	750	650	286	1037	589	997	1140	647	898	563	765	329	505	699	150	1590	365
beta-gentiobiose	965352	160	100873	85:1429.0 86:721.0 87:1340.0 88:666.0 89:9018.0 90:749.0 91:536.0 92:96.0 93:135.0 94:142.0 95:134.0 96:89.0 97:641.0 98:223.0 99:1242.0 100:2366.0 101:8618.0 102:2362.0 103:22500.0 104:1984.0 105:4901.0 106:339.0 107:183.0 109:858.0 110:33.0 111:683.0 112:262.0 113:1304.0 114:964.0 115:1755.0 116:4243.0 117:12702.0 118:1086.0 119:1415.0 120:139.0 121:184.0 125:66.0 126:100.0 127:843.0 128:487.0 …	441422	C08240	DLRVVLDZNNYCBX-LIZSDCNHSA-N	0.56	0.04	19705	750	1825	3421	1195	725	2046	1722	1783	329	15666	1076	2337	1882	2540	2231	380	628	1447	6127	770	1679	731	1821	1421	1296	777	2868	2726	2975	2936	2353	12431	2007	394	1282	211863	421	3941	942
beta-alanyl lysine	894559	174	110189	85:233.0 86:7873.0 87:1113.0 88:299.0 94:49.0 97:35.0 98:314.0 99:57.0 100:9516.0 101:1255.0 102:1023.0 106:21.0 108:212.0 109:178.0 111:45.0 112:213.0 114:227.0 115:588.0 116:687.0 118:71.0 119:90.0 126:34.0 128:1135.0 129:1015.0 130:1300.0 131:1203.0 132:372.0 133:607.0 134:161.0 135:403.0 140:111.0 141:23.0 142:839.0 143:218.0 144:205.0 146:408.0 147:1503.0 148:446.0 154:563.0 156:2083.0 157:1…	440638	C05341	PLDCWKCPEXNWJH-ZETCQYMHSA-N	0.14	0.13	2572	4869	3008	3193	1049	1546	2552	1211	1877	3753	4337	3994	1256	2556	4224	2058	1097	1853	4807	2382	1804	3113	2245	1682	2479	1770	5421	1657	2874	2040	1865	1851	930	2218	1048	7068	4676	967	3935	2160
beta-alanine	435564	248	148	85:228.0 86:3117.0 87:240.0 90:32.0 93:32.0 95:19.0 99:386.0 100:1891.0 101:337.0 102:313.0 103:237.0 104:118.0 107:63.0 113:116.0 114:91.0 117:236.0 119:17.0 120:39.0 129:105.0 130:635.0 133:1533.0 134:301.0 135:92.0 137:24.0 142:51.0 146:224.0 147:2196.0 148:431.0 160:346.0 161:56.0 162:41.0 164:29.0 168:16.0 170:19.0 172:67.0 173:3.0 174:3380.0 175:583.0 176:292.0 181:27.0 187:19.0 188:94.0 18…	239	C00099	UCMIRNVEIXFBKS-UHFFFAOYSA-N	0.91	0.9	18026	155328	22810	35796	5157	75034	16368	24056	32080	96734	59053	97379	22583	77376	70886	31947	17053	13362	87648	27302	22964	20721	10971	25675	39606	41715	24914	10811	18246	19712	14547	8476	59321	87513	34804	218420	4257	3034	32987	73310
benzoic acid	339214	179	34148	85:1157.0 86:1734.0 87:2480.0 88:121.0 89:513.0 90:980.0 91:549.0 92:250.0 93:77.0 94:121.0 95:181.0 96:222.0 97:454.0 98:347.0 99:9572.0 101:42.0 102:702.0 103:388.0 104:400.0 105:35970.0 106:2911.0 107:507.0 108:188.0 109:90.0 111:1502.0 112:267.0 113:535.0 114:841.0 115:1284.0 116:2857.0 117:1721.0 118:67.0 119:303.0 120:76.0 121:549.0 122:100.0 123:143.0 125:83.0 126:12.0 127:218.0 128:145.0 …	243	C00180	WPYMKLBDIGXBTP-UHFFFAOYSA-N	0.99	0.96	45173	34824	33481	35988	13146	27177	28820	25928	17859	3115	15500	32693	45683	23297	27713	16382	25446	35165	24578	32870	5062	15918	13461	23382	25873	24618	40021	20188	17072	37971	29756	20052	42345	47961	13568	38472	20470	10098	42105	25345
behenic acid	919293	117	382585	85:11890.0 86:2544.0 87:2201.0 88:1513.0 89:7696.0 90:1046.0 91:2233.0 92:441.0 93:5573.0 94:900.0 95:14418.0 96:3012.0 97:16137.0 98:12358.0 99:6110.0 100:991.0 101:4097.0 102:1076.0 103:5732.0 104:438.0 105:4818.0 106:563.0 107:2851.0 108:452.0 109:4899.0 110:854.0 111:8062.0 112:2863.0 113:1469.0 114:413.0 115:2419.0 116:11506.0 117:208933.0 118:19530.0 119:8601.0 120:435.0 121:2720.0 122:370.…	8215	C08281	UKMSUNONTOPOIO-UHFFFAOYSA-N	0.65	0.14	8066	19299	7258	3239	8355	4640	7406	10025	25769	7807	4266	6946	3475	7648	8398	9004	905	7431	8133	8786	5190	9872	837	5363	2365	3485	6029	12936	14938	8053	6499	9094	10914	1279	1200	7636	4732	4335	7719	10623
azelaic acid	610551	317	329430	85:4024.0 86:2227.0 87:401.0 88:1079.0 91:2867.0 92:570.0 93:4066.0 95:1934.0 96:1467.0 97:5855.0 98:622.0 99:2736.0 100:1110.0 101:2248.0 102:958.0 103:2192.0 107:1747.0 109:3699.0 110:597.0 111:502.0 115:1692.0 116:8089.0 117:17525.0 118:1600.0 119:528.0 121:182.0 123:1047.0 124:1220.0 125:894.0 127:1231.0 129:16201.0 130:2038.0 131:3372.0 133:6408.0 135:1140.0 136:356.0 142:187.0 143:2329.0 14…	19347555	C08261	BDJRBEYXGGNYIS-UHFFFAOYSA-N	0.78	0.78	3554	1709	1328	1320	1258	1233	1912	889	1513	772	231	1545	1240	1229	1267	817	1089	233	1060	1512	1725	1327	711	1074	2152	1313	2015	1352	2315	1894	1195	956	2342	1827	359	1839	348	494	2565	1590
aspartic acid	480387	232	79	87:91.0 96:51.0 97:57.0 98:86.0 99:100.0 100:3071.0 101:325.0 102:140.0 103:85.0 115:76.0 117:579.0 118:67.0 129:72.0 130:177.0 132:82.0 133:399.0 134:83.0 142:92.0 147:1028.0 148:289.0 149:74.0 160:33.0 163:47.0 164:28.0 173:22.0 174:51.0 188:319.0 189:76.0 190:42.0 202:314.0 203:31.0 204:79.0 216:94.0 218:511.0 219:116.0 220:18.0 232:2572.0 233:417.0 234:183.0 235:21.0 267:39.0 291:15.0 306:42.…	5960	C00049	CKLJMWTZIZZHCS-REOHCLBHSA-N	0.95	0.98	22242	133911	48716	208196	24896	27536	9819	13415	70452	49047	28792	39450	10875	245959	35382	6885	68529	33961	70656	45509	18039	46095	8277	22723	110775	20318	86177	14698	50180	14111	15077	7603	39482	20225	83331	55432	42699	50218	5493	33004
asparagine	553078	231	146	86:261.0 87:142.0 88:87.0 89:283.0 90:151.0 91:43.0 92:46.0 93:35.0 98:167.0 100:1725.0 101:112.0 102:22.0 104:36.0 107:43.0 108:48.0 109:43.0 111:105.0 112:77.0 113:62.0 114:223.0 115:405.0 116:5151.0 117:1014.0 118:309.0 119:90.0 120:36.0 125:136.0 126:95.0 128:266.0 130:448.0 131:829.0 132:2241.0 133:857.0 134:239.0 135:54.0 137:47.0 141:1377.0 142:341.0 143:178.0 144:126.0 145:46.0 146:126.0 …	6267	C00152	DCXYFEDJOCDNAF-REOHCLBHSA-N	1	1	8647	13882	7100	11593	4144	10941	5199	4227	5855	5704	3290	7939	4334	14955	8407	5343	5335	4732	14548	7658	4628	7215	2840	5631	9967	5449	5351	5658	9338	4801	4979	2932	7764	6838	7512	5463	3591	1994	5382	5044
arachidonic acid	837115	91	64589	85:8972.0 88:4884.0 89:53747.0 90:12379.0 91:1986143.0 92:445814.0 93:1024668.0 94:368422.0 95:357548.0 96:41847.0 97:27251.0 103:48984.0 104:123674.0 105:867808.0 106:682595.0 107:374732.0 108:454293.0 109:137838.0 110:8677.0 111:1163.0 115:121297.0 117:1291545.0 118:216358.0 119:711032.0 120:374816.0 121:180393.0 122:78287.0 123:24472.0 127:6430.0 128:51855.0 129:620669.0 130:124204.0 131:50274…	444899	C00219	YZXBAPSDXZZRGB-DOFZRALJSA-N	0.99	1	20309	72107	7744	19723	29347	25845	11953	13023	9969	26300	19922	42547	29588	52496	19656	19708	66360	26760	33274	22419	42865	25370	8395	14758	48515	81706	186990	7237	18870	15701	22545	20632	19887	70482	21973	63079	18590	8699	30645	22262
arachidic acid	856421	117	291	85:167.0 89:444.0 90:10.0 92:58.0 93:400.0 94:80.0 95:656.0 98:494.0 99:384.0 100:46.0 102:86.0 105:51.0 107:116.0 110:60.0 111:101.0 113:12.0 115:21.0 116:933.0 117:16860.0 118:1459.0 119:650.0 120:71.0 125:117.0 128:67.0 129:7682.0 130:803.0 132:6486.0 133:1341.0 134:343.0 135:92.0 137:72.0 138:29.0 140:58.0 141:48.0 143:611.0 144:144.0 145:3932.0 146:417.0 157:65.0 159:172.0 160:80.0 161:46.0 …	10467	C06425	VKOBVWXKNCXXDE-UHFFFAOYSA-N	0.92	0.99	16604	11560	11330	9219	4781	12296	9800	8660	7414	13403	8451	10087	13675	10590	726	7736	5153	12160	13414	15848	8474	5832	4796	9361	7900	10239	8878	10882	8716	14513	12104	7912	4178	19871	5336	10628	5891	6849	13240	11517
arabitol	572730	103	372446	85:2758.0 86:4683.0 87:26719.0 88:20528.0 89:94804.0 90:8837.0 91:4319.0 92:198.0 93:1522.0 94:1182.0 95:1716.0 96:1028.0 97:4394.0 98:1729.0 99:13063.0 101:82300.0 102:12277.0 103:768966.0 104:72837.0 105:37260.0 106:1894.0 107:887.0 108:631.0 109:712.0 110:1444.0 111:10142.0 112:1314.0 113:15331.0 114:2643.0 115:20427.0 116:31686.0 117:283728.0 118:29774.0 119:27052.0 120:1795.0 121:1501.0 122:…	94154	C01904	HEBKCHPVOIAQTA-QWWZWVQMSA-N	0.52	0.95	55744	3004	40839	35420	26250	3916	47860	37994	13468	12179	11230	968	59359	27546	5982	26712	4149	2264	2940	36715	9668	8745	5248	20863	12470	13757	10938	36608	63531	58612	41322	37676	81122	1158	11886	2326	18662	4664	39349	4180
anthranilic acid	530297	266	12895	87:37.0 91:179.0 92:94.0 99:36.0 100:714.0 101:106.0 106:25.0 108:38.0 110:82.0 113:374.0 114:12.0 115:160.0 116:250.0 118:627.0 119:171.0 120:139.0 126:166.0 129:201.0 130:73.0 132:140.0 133:95.0 134:722.0 135:29.0 142:59.0 143:63.0 144:74.0 146:51.0 149:244.0 150:143.0 151:45.0 152:24.0 156:29.0 157:10.0 159:56.0 160:11.0 168:8.0 170:151.0 171:118.0 172:181.0 173:57.0 174:132.0 176:136.0 178:17…	227		RWZYAGGXGHYGMB-UHFFFAOYSA-N	0.27	0.63	1038	1162	1061	908	578	2306	644	1869	741	2520	671	2064	1433	610	1073	896	1150	768	1880	41	1202	1588	422	2232	1602	947	972	1589	1650	767	581	540	2499	63	1154	1699	692	154	1330	2623
alpha-ketoglutarate	507392	198	294	85:208.0 87:154.0 89:4657.0 90:84.0 91:201.0 94:49.0 98:155.0 99:133.0 101:112.0 102:113.0 103:234.0 110:90.0 112:1654.0 113:180.0 114:75.0 115:296.0 118:19.0 125:56.0 126:615.0 128:246.0 129:323.0 131:331.0 133:422.0 135:87.0 142:51.0 143:95.0 144:23.0 145:67.0 147:7768.0 148:1161.0 149:693.0 152:14.0 154:243.0 155:35.0 156:3139.0 157:398.0 158:205.0 159:36.0 160:14.0 161:16.0 163:100.0 170:1125…	51	C00026	KPGXRSRHYNQIFN-UHFFFAOYSA-N	0	0.31	988	406	208	394	654	633	450	602	241	539	430	279	593	6676	655	358	427	652	1440	275	380	493	233	626	559	569	657	322	553	717	371	177	843	1084	299	1331	3057	311	414	476
allantoic acid	722792	259	390545	85:2943.0 86:4097.0 87:2851.0 88:948.0 89:1316.0 90:330.0 93:237.0 97:300.0 98:504.0 99:5074.0 100:36197.0 101:13885.0 102:4561.0 103:1873.0 104:217.0 105:413.0 110:203.0 111:166.0 112:123.0 113:753.0 114:834.0 115:4207.0 116:9092.0 117:6847.0 118:1085.0 119:478.0 120:203.0 121:104.0 122:74.0 125:164.0 126:161.0 128:1004.0 129:4992.0 130:3228.0 131:2906.0 132:4782.0 133:2290.0 134:656.0 136:100.0…	203	C00499	NUCLJNSWZCHRKL-UHFFFAOYSA-N	0.13	1	839	522	499	245	473	296	239	124	170	300	156	427	267	1553	320	288	296	241	247	121	232	394	167	497	922	601	323	426	438	387	256	252	38415	377	171	285	1959	393	5927	318
alanine-alanine	523110	116	114683	86:4308.0 87:938.0 89:660.0 90:85.0 91:105.0 92:48.0 93:88.0 94:36.0 96:133.0 97:194.0 100:3903.0 101:1008.0 102:1184.0 103:1209.0 104:93.0 105:169.0 106:46.0 107:58.0 108:46.0 110:39.0 111:55.0 114:1266.0 116:90302.0 117:10500.0 118:8719.0 119:688.0 128:1227.0 129:2108.0 130:1543.0 132:128.0 133:262.0 134:42.0 135:72.0 137:33.0 141:9.0 143:370.0 144:409.0 146:171.0 150:55.0 153:40.0 157:764.0 15…	5484352	C00993	DEFJQIDDEAULHB-IMJSIDKUSA-N	0.49	0.09	15922	19128	8837	9454	7626	8697	33881	5938	20347	34948	5453	27767	20524	21171	19947	14502	34994	7417	5932	4710	21335	10032	6340	23328	6535	10798	16492	16840	33670	5307	21941	9659	6806	9670	21919	8845	4189	19847	12068	13119
alanine	243971	116	34178	85:333.0 86:2106.0 87:467.0 88:280.0 89:5.0 90:53.0 91:138.0 92:168.0 93:215.0 94:1333.0 95:43.0 96:6.0 98:74.0 99:48.0 100:4652.0 101:1063.0 102:1419.0 103:3674.0 104:501.0 105:328.0 106:3.0 108:75.0 109:236.0 110:175.0 112:94.0 114:926.0 115:860.0 116:84295.0 117:10442.0 118:3671.0 119:545.0 120:126.0 121:65.0 122:38.0 123:90.0 124:32.0 125:42.0 126:107.0 127:278.0 128:1618.0 129:278.0 130:1195…	5950	C00041	QNAYBMKLOCPYGJ-REOHCLBHSA-N	0.86	0.76	767550	459324	927654	692390	217846	271224	835439	686413	805212	1450699	622843	1243385	925786	982399	379107	664319	650170	201063	247736	1028796	599883	408664	442806	584737	562825	1488312	380324	523516	1011672	578010	432385	336824	628657	1014883	1665865	386494	1178099	793153	780598	360217
adipic acid	474435	111	125	85:2037.0 86:2852.0 87:703.0 88:641.0 89:904.0 90:27.0 91:64.0 92:167.0 93:122.0 94:58.0 95:60.0 96:79.0 97:441.0 99:4029.0 100:405.0 101:502.0 102:524.0 105:259.0 107:59.0 108:26.0 109:187.0 110:362.0 111:58622.0 112:3744.0 113:1086.0 114:171.0 115:1351.0 116:2824.0 117:11244.0 118:1055.0 119:703.0 120:50.0 123:10.0 124:19.0 125:208.0 126:57.0 128:229.0 129:9390.0 130:2687.0 131:1989.0 132:910.0…	196	C06104	WNLRTRBMVRJNCN-UHFFFAOYSA-N	0.87	0.79	17239	16715	9121	7571	3119	5814	9829	6792	7362	4935	4117	5726	10694	4702	5518	4393	5207	4930	5793	8753	6560	6124	3312	7319	9801	7495	9420	9977	7458	12869	6988	5519	14126	8658	2226	19012	5432	1964	10234	8245
adenosine	918039	236	290	85:353.0 86:112.0 89:208.0 95:41.0 98:54.0 99:460.0 100:35.0 101:439.0 102:88.0 103:2553.0 104:236.0 105:110.0 109:159.0 111:217.0 113:236.0 115:473.0 116:284.0 117:469.0 119:106.0 120:28.0 126:71.0 129:719.0 130:43.0 131:300.0 132:124.0 133:869.0 134:103.0 135:182.0 136:60.0 137:23.0 138:121.0 139:38.0 142:46.0 143:329.0 144:32.0 145:58.0 147:1456.0 148:317.0 149:320.0 151:23.0 153:75.0 155:49.0…	60961	C00212	OIRDTQYFTABQOQ-KQYNXXCUSA-N	0.63	0.01	8742	1621	1285	1168	1574	1152	13660	1148	1543	597	585	138	3555	2064	1431	1340	540	1227	4539	1076	2187	395	1381	1129	2624	1482	1117	3140	4857	10194	5068	1610	2160	1891	540	1393	2500	5821	3053	882
adenine	646534	264	1764	85:258.0 92:26.0 93:169.0 98:13.0 99:241.0 100:98.0 102:99.0 104:48.0 110:149.0 111:262.0 112:6.0 116:64.0 122:1.0 124:60.0 126:21.0 129:21.0 130:276.0 137:10.0 138:43.0 139:12.0 144:218.0 148:39.0 149:1110.0 150:48.0 152:17.0 153:364.0 157:26.0 158:2.0 160:15.0 162:52.0 164:56.0 165:208.0 166:57.0 167:27.0 180:42.0 192:582.0 202:3.0 205:36.0 206:131.0 219:65.0 221:9.0 223:14.0 225:69.0 226:52.0 …	190	C00147	GFFGJBXGBJISGV-UHFFFAOYSA-N	0.82	0	46211	50670	25143	48338	53522	24144	15788	29102	47466	25261	21772	38010	16996	77880	27973	11454	29596	36622	71938	48216	47486	70020	22197	25743	57010	58547	15938	21121	40338	26876	14032	17586	19599	44131	21213	35762	2663	15467	14939	35630
aconitic acid	586815	229	29	85:823.0 86:194.0 87:662.0 88:337.0 89:711.0 90:119.0 91:200.0 93:1018.0 94:224.0 95:1683.0 96:1733.0 97:6038.0 98:1174.0 99:1242.0 100:178.0 101:600.0 102:310.0 103:1548.0 104:242.0 105:655.0 107:259.0 108:172.0 109:241.0 110:546.0 111:911.0 112:674.0 113:694.0 115:1207.0 116:392.0 117:2280.0 118:273.0 119:1093.0 120:174.0 121:326.0 122:39.0 123:487.0 124:76.0 125:294.0 126:191.0 127:456.0 128:2…	643757	C00417	GTZCVFVGUGFEME-IWQZZHSRSA-N	0	0.86	335	166	178	75	1846	2602	157	1309	1641	1542	1883	88	1291	137	2726	1411	74	118	2257	68	2274	1808	1901	1688	2147	114	72	94	1205	1144	315	94	346	180	1927	2145	81	1809	805	2513
6-hydroxynicotinic acid	510614	268	114257	85:189.0 89:181.0 90:79.0 92:23.0 93:53.0 94:107.0 95:284.0 96:64.0 97:69.0 100:186.0 101:258.0 105:41.0 106:45.0 108:50.0 109:46.0 111:64.0 112:73.0 115:23.0 116:93.0 119:115.0 120:91.0 121:56.0 122:138.0 123:136.0 124:69.0 125:31.0 127:207.0 128:90.0 132:36.0 133:194.0 134:48.0 135:68.0 136:126.0 138:51.0 140:25.0 142:69.0 146:32.0 150:67.0 151:125.0 152:149.0 153:24.0 159:50.0 161:47.0 165:90.…	72924	C01020	BLHCMGRVFXRYRN-UHFFFAOYSA-N	0.28	0	1557	2697	696	2347	2954	6211	2310	4103	3567	7560	1983	4134	8920	4640	8034	2331	10901	4871	5505	588	19529	17113	1874	11347	9569	3360	2897	5822	14844	3887	1406	1384	2214	870	4876	3634	85	144	854	29514
6-deoxyglucose	573663	117	85102	85:1382.0 86:894.0 87:839.0 88:367.0 89:5317.0 90:407.0 91:305.0 95:82.0 96:126.0 97:153.0 98:192.0 99:868.0 100:2605.0 101:2321.0 102:1181.0 103:5551.0 104:561.0 105:2504.0 106:242.0 107:146.0 108:149.0 109:70.0 110:120.0 111:250.0 112:338.0 113:533.0 114:1548.0 115:2124.0 116:1054.0 117:90320.0 118:9236.0 119:3823.0 120:191.0 121:50.0 122:58.0 124:133.0 125:98.0 126:205.0 127:703.0 128:771.0 12…	441480	C08352	PNNNRSAQSRJVSB-JGWLITMVSA-N	0.46	0.01	49817	29034	160816	252449	113788	32597	188870	87777	85438	182817	41462	42125	46961	447150	52649	22606	52220	19729	35162	194049	79422	115008	41368	129951	108443	185641	60835	53886	89537	44271	38005	24269	73943	55721	84953	23889	7680	18668	41415	27846
5-methoxytryptamine	864466	174	284	86:1203.0 87:181.0 88:92.0 90:42.0 92:34.0 95:29.0 100:628.0 101:65.0 102:70.0 105:49.0 110:34.0 112:50.0 115:39.0 117:67.0 118:56.0 121:41.0 124:29.0 130:92.0 131:54.0 132:79.0 135:54.0 150:31.0 155:19.0 158:46.0 159:57.0 172:30.0 174:4979.0 175:869.0 176:366.0 202:87.0 204:33.0 205:32.0 206:13.0 211:21.0 212:12.0 217:34.0 218:39.0 222:50.0 223:29.0 225:17.0 228:24.0 231:36.0 233:36.0 235:29.0 2…	1833	C05659	JTEJPPKMYBDEMY-UHFFFAOYSA-N	0.46	0.94	2210	3439	1413	2383	1754	7225	1606	173	2743	3664	1573	2015	1836	2417	6869	6040	2252	6000	6306	1959	1841	6515	4069	6618	2279	2200	2897	6242	3610	1908	2174	1952	2857	5946	2109	5480	896	648	5405	433
5-ketogluconate	666566	189	112716	85:179.0 89:1599.0 90:9.0 100:256.0 101:124.0 102:267.0 103:2300.0 104:192.0 105:393.0 114:546.0 115:151.0 116:68.0 117:516.0 118:12.0 119:243.0 127:18.0 128:64.0 129:390.0 130:387.0 131:489.0 132:28.0 133:1374.0 134:304.0 135:46.0 142:242.0 143:573.0 144:31.0 147:4414.0 148:689.0 149:390.0 150:75.0 151:5.0 156:10.0 163:120.0 170:130.0 171:18.0 172:243.0 173:724.0 174:97.0 175:75.0 177:49.0 189:3…	5460352	C01062	IZSRJDGCGRAUAR-MROZADKFSA-N	0.25	0.03	13021	75290	9064	8551	1677	11142	5075	7187	2482	5435	3236	21183	1182	9874	5224	1963	1701	4048	4109	4895	1691	4976	1885	2673	1677	13382	14080	2093	4716	2772	3176	2237	2621	15379	4372	47596	8290	1807	2842	1836
5-aminovaleric acid	536657	174	1698	85:189.0 86:2159.0 87:251.0 97:75.0 98:42.0 99:58.0 100:1189.0 101:180.0 102:422.0 107:116.0 109:25.0 112:223.0 114:52.0 115:46.0 116:194.0 117:280.0 123:29.0 125:1.0 126:134.0 128:21.0 129:828.0 130:249.0 131:289.0 132:190.0 133:45.0 135:16.0 146:99.0 148:253.0 152:19.0 154:184.0 156:230.0 157:40.0 158:71.0 160:40.0 170:64.0 172:165.0 174:8981.0 175:1547.0 176:642.0 177:54.0 186:31.0 188:42.0 19…	138	C00431	JJMDCOVWQOJGCB-UHFFFAOYSA-N	0.99	0.86	4353908	3323563	5596079	2919832	1350248	2406959	4047402	1978840	2779967	2488468	4810253	4405488	2014929	4466753	2912094	2516119	1623888	2804758	2201417	3063602	1104997	1878313	3117619	1728755	2137956	2845969	7688552	1960580	1864537	3472024	8457191	3587498	5105741	6303643	2490458	3195083	1765256	665546	4646094	1449236
4-hydroxyphenylacetic acid	542795	179	31555	85:74.0 89:848.0 90:484.0 91:340.0 93:30.0 95:3.0 97:50.0 98:40.0 101:1.0 102:542.0 104:207.0 105:301.0 107:207.0 109:9.0 112:6.0 113:36.0 114:37.0 116:22.0 117:97.0 119:14.0 121:91.0 123:17.0 130:32.0 133:307.0 134:89.0 135:516.0 136:71.0 137:25.0 142:12.0 145:27.0 147:753.0 149:559.0 150:125.0 151:12.0 153:1.0 161:273.0 162:35.0 163:909.0 164:2215.0 165:409.0 166:53.0 169:9.0 171:18.0 172:6.0 1…	127	C00642	XQXPVVBIMDBYFF-UHFFFAOYSA-N	0.34	0.2	101000	138582	72692	114272	37264	167041	98773	67518	99735	190457	152608	342312	94083	196415	118559	61123	76725	35507	178486	79517	51017	76187	51777	74148	108118	86916	399643	78728	110805	123371	101053	53674	156803	378683	112316	210333	9642	5087	82478	90961
4-hydroxybutyric acid	325027	233	85123	85:1473.0 86:1030.0 88:1141.0 90:78.0 97:88.0 99:1509.0 100:534.0 101:1470.0 102:152.0 103:1274.0 104:135.0 105:287.0 109:555.0 110:127.0 111:131.0 113:83.0 115:915.0 116:653.0 117:10011.0 118:922.0 119:717.0 129:821.0 130:174.0 131:930.0 132:466.0 133:1873.0 134:148.0 143:2878.0 144:298.0 147:42121.0 148:6583.0 149:3200.0 150:406.0 151:85.0 157:102.0 187:41.0 192:99.0 204:836.0 205:197.0 222:17.…	10413	C00989	SJZRECIVHVDYJC-UHFFFAOYSA-N	0.35	0	4514	773	3482	2917	2354	519	1849	2260	4109	1318	3508	1863	3508	1611	2363	2384	1106	591	639	3922	1930	1153	2635	2207	2607	2010	1411	3403	1719	3827	2144	1900	2516	3168	1472	1180	3431	2841	3613	709
4-hydroxybenzoic acid	537290	267	370159	85:7245.0 86:1061.0 87:2212.0 88:845.0 89:17207.0 90:7260.0 91:31159.0 92:14537.0 93:6616.0 94:931.0 95:4812.0 96:2700.0 97:2166.0 98:584.0 99:1678.0 100:1577.0 101:611.0 103:9171.0 104:11271.0 105:12053.0 106:1893.0 107:4059.0 108:796.0 109:2160.0 111:2900.0 112:719.0 113:519.0 114:171.0 115:2782.0 116:551.0 117:3740.0 118:3300.0 119:6558.0 120:3899.0 121:7180.0 122:5034.0 123:2732.0 124:447.0 1…	135	C00156	FJKROLUGYXJWQN-UHFFFAOYSA-N	0.56	0.04	171357	21918	102763	173451	22884	41365	137139	121455	106549	72480	68423	81251	120099	18868	92899	89131	74571	24322	58635	147115	56302	74708	66757	127268	115384	65537	40669	152108	133799	158901	134458	102524	134989	45457	60384	61960	5302	6826	106885	95266
4-aminobutyric acid	488730	304	1842	85:2931.0 86:36127.0 88:1868.0 89:824.0 90:367.0 91:21.0 92:27.0 93:383.0 94:61.0 95:474.0 96:289.0 97:896.0 98:1926.0 99:2673.0 100:23284.0 101:4921.0 102:4701.0 103:1487.0 104:675.0 105:715.0 106:24.0 107:184.0 108:203.0 109:406.0 110:716.0 111:335.0 112:2089.0 113:1884.0 114:3527.0 115:3212.0 116:3300.0 117:5040.0 118:1020.0 119:1376.0 120:195.0 121:54.0 122:39.0 123:55.0 124:233.0 125:201.0 1…	119	C00334	BTCSSZJGUNDROE-UHFFFAOYSA-N	0.71	0.05	6659	2506	4615	20667	59210	3472	13935	80565	13078	3494	15744	6044	14205	5419	2895	22064	6991	3139	3332	9637	26255	13225	3485	28791	7833	2026	3547	45524	7417	10563	2972	11074	1799	119	7238	3627	10756	197730	7049	6241
3-phenyllactic acid	516011	193	113643	90:151.0 91:4047.0 92:276.0 93:36.0 101:283.0 103:861.0 104:675.0 105:348.0 115:199.0 117:554.0 118:76.0 119:236.0 120:23.0 121:151.0 123:19.0 131:1334.0 132:204.0 133:1618.0 134:213.0 135:228.0 137:22.0 144:30.0 147:9562.0 148:1737.0 149:951.0 150:54.0 161:262.0 163:188.0 164:41.0 169:74.0 175:49.0 176:17.0 177:84.0 178:39.0 190:53.0 191:160.0 192:127.0 193:7922.0 194:979.0 195:193.0 205:277.0 2…	3848		VOXXWSYKYCBWHO-UHFFFAOYSA-N	0.85	0.48	3407	1351	16508	4544	19451	545	1802	8675	9503	10917	2979	2814	3430	8790	725	5943	18623	3229	858	15276	2740	1739	959	2083	4951	7596	1008	1749	1587	2339	252	3644	7970	14092	2191	661	7269	46333	32653	873
3-hydroxypropionic acid	269265	177	1977	85:317.0 87:1774.0 88:555.0 89:599.0 90:145.0 92:72.0 94:12.0 97:21.0 98:250.0 99:13.0 100:2863.0 101:1816.0 102:1129.0 103:1749.0 104:165.0 105:296.0 106:148.0 107:346.0 108:79.0 110:47.0 111:3.0 112:18.0 114:15.0 115:504.0 116:1895.0 117:741.0 118:214.0 124:3.0 125:97.0 127:452.0 128:11.0 129:912.0 130:261.0 131:1035.0 132:105.0 133:1862.0 134:111.0 135:188.0 139:1.0 140:13.0 142:22.0 143:205.0…	68152	C01013	ALRHLSYJTWAHJZ-UHFFFAOYSA-N	0.24	0	14186	8004	11395	12358	51335	7398	16798	20329	11112	6579	6901	11615	14037	17242	9071	16462	12885	8627	5997	55286	10402	5383	11721	18268	10475	9407	18953	14315	12480	15054	12808	11489	10299	13937	7370	8740	7969	2654	43399	5558
3-hydroxypalmitic acid	774930	233	104418	85:352.0 87:92.0 88:53.0 91:242.0 93:193.0 95:752.0 96:217.0 97:1171.0 98:57.0 99:263.0 101:1676.0 102:193.0 103:806.0 104:70.0 109:304.0 110:38.0 111:545.0 113:159.0 115:268.0 117:1552.0 118:97.0 119:239.0 121:167.0 123:76.0 125:190.0 129:875.0 130:935.0 131:673.0 133:1543.0 134:176.0 135:260.0 137:50.0 139:70.0 143:774.0 144:83.0 145:150.0 146:16.0 147:9081.0 148:1240.0 149:1302.0 150:149.0 151…	15569776		CBWALJHXHCJYTE-OAHLLOKOSA-N	0.16	0	14390	4128	5668	12547	1888	4821	17791	9198	445	7544	5158	7462	15591	3287	8753	6534	7486	3647	8932	11505	6618	11119	4849	9520	12266	9640	3396	13423	12992	17092	11986	8560	6907	2230	4734	7374	189	284	4970	4722
3-hydroxybutyric acid	278632	191	145501	85:131.0 87:1473.0 88:6305.0 89:1090.0 90:120.0 91:68.0 95:57.0 96:101.0 98:187.0 99:1246.0 100:1071.0 101:2671.0 102:480.0 105:239.0 112:38.0 113:234.0 115:3134.0 116:423.0 117:29724.0 118:3054.0 119:1586.0 121:72.0 125:44.0 128:13.0 129:229.0 130:4368.0 131:1815.0 132:261.0 133:5879.0 134:969.0 135:540.0 139:28.0 141:46.0 144:210.0 146:140.0 147:40360.0 148:7485.0 149:5505.0 150:460.0 151:191.0…	92135	C01089	WHBMMWSBFZVSSR-GSVOUGTGSA-N	0.27	0.46	66182	23629	23214	12064	7662	18487	34750	7301	21658	16064	7310	21099	18856	44562	13803	15081	9685	12129	13786	30126	11902	12074	10397	5375	13079	27719	26894	19237	10626	24408	26296	7854	57615	35420	49547	17685	24662	13123	32716	10717
3-hydroxy-3-methylglutaric acid	521554	247	32000	85:626.0 88:16.0 99:275.0 100:730.0 101:73.0 102:61.0 103:177.0 105:4.0 109:1920.0 110:105.0 111:74.0 112:83.0 113:58.0 114:82.0 115:2396.0 116:497.0 117:648.0 119:126.0 122:1.0 128:36.0 129:150.0 131:335.0 133:955.0 134:20.0 135:5.0 140:38.0 141:84.0 142:47.0 144:16.0 147:3623.0 148:545.0 149:525.0 150:59.0 151:23.0 157:174.0 159:95.0 163:168.0 164:7.0 170:7.0 171:247.0 172:45.0 183:513.0 184:30…	1662	C03761	NPOAOTPXWNWTSH-UHFFFAOYSA-N	0.24	0.14	847	121	308	227	383	142	402	675	149	294	598	144	429	174	136	594	51	97	138	196	520	138	95	767	148	44	215	602	424	498	196	171	462	113	366	201	39	253	244	58
3-Aminopiperidine-2,6-dione	525893	156	215853	85:6557.0 86:3382.0 92:43.0 94:225.0 95:211.0 97:365.0 98:2675.0 99:2953.0 100:7113.0 101:3220.0 106:82.0 108:195.0 110:581.0 111:400.0 112:4029.0 113:2102.0 114:2003.0 115:1921.0 116:17844.0 117:3573.0 118:1437.0 119:557.0 121:1648.0 122:20.0 123:33.0 124:139.0 126:467.0 127:579.0 128:1787.0 129:3959.0 130:2661.0 132:634.0 133:3611.0 134:400.0 135:376.0 138:92.0 139:170.0 140:7311.0 141:2540.0 1…	134508		NPWMTBZSRRLQNJ-UHFFFAOYSA-N	0.3	0.34	2995	5962	4738	4431	2512	2814	3414	2262	4109	78192	4236	1011	1861	8938	4362	2238	2465	2287	6218	578	1581	3787	2063	3044	2451	2090	3846	3804	3770	3302	2126	1641	3946	964	5325	3753	2494	17893	2483	2965
3-aminoisobutyric acid	455267	248	68084	86:338518.0 87:46881.0 88:16592.0 99:1719.0 100:184623.0 101:23299.0 102:35160.0 103:16116.0 104:4899.0 113:5017.0 114:8548.0 115:3909.0 116:23405.0 117:18916.0 118:5795.0 119:6263.0 120:431.0 122:605.0 130:36886.0 131:26230.0 132:14131.0 133:54171.0 134:10324.0 135:989.0 136:144.0 144:5214.0 146:15280.0 147:92433.0 148:14500.0 149:6149.0 150:1268.0 157:1090.0 158:5311.0 160:11439.0 162:1053.0 17…	64956	C05145	QCHPKSFMDHPSNR-UHFFFAOYSA-N	0.82	0.03	597	1749	3771	2863	250	3391	1224	1150	2026	5171	3031	4314	511	1240	4071	1679	631	952	2468	2481	1394	603	728	755	2933	3948	4024	1700	195	337	781	258	3722	1946	6288	2154	1024	283	1717	2613
3,6-anhydro-D-galactose	588886	231	102714	85:192.0 86:135.0 87:64.0 88:217.0 89:4369.0 90:296.0 91:328.0 92:63.0 93:171.0 94:173.0 95:2021.0 96:291.0 97:94.0 98:608.0 99:333.0 100:613.0 101:2506.0 102:326.0 103:4816.0 104:494.0 105:1735.0 106:197.0 107:96.0 108:60.0 109:30.0 110:66.0 111:435.0 112:245.0 113:287.0 114:68.0 115:458.0 116:580.0 117:2812.0 118:407.0 119:583.0 121:215.0 122:64.0 123:123.0 124:59.0 125:104.0 126:952.0 127:256.…	16069996	C06474	WZYRMLAWNVOIEX-BGPJRJDNSA-N	0.58	0.19	10701	3233	5115	7858	4355	4023	6814	8099	6491	3247	3457	4748	5477	2000	4953	10701	3811	3877	4987	8153	7081	4979	3714	14421	7314	2201	2215	13873	9741	6967	5313	8348	10262	3556	1764	7120	2672	1043	11366	4427
3,4-dihydroxyphenylacetic acid	625046	179	32204	85:28.0 86:102.0 87:5.0 89:63.0 90:1.0 91:12.0 92:18.0 93:81.0 94:23.0 95:280.0 96:478.0 97:77.0 98:92.0 99:17.0 104:301.0 107:13.0 109:25.0 110:87.0 117:55.0 118:1.0 119:43.0 128:53.0 131:119.0 133:167.0 134:73.0 135:15.0 136:3.0 137:13.0 139:14.0 141:26.0 147:242.0 149:231.0 151:8.0 161:17.0 163:69.0 164:8.0 166:5.0 169:14.0 170:12.0 171:29.0 176:18.0 177:22.0 178:57.0 179:2366.0 180:295.0 181:…	547	C01161	CFFZDZCDUFSOFZ-UHFFFAOYSA-N	0.28	0	2314	1361	1274	4655	1253	1441	2486	3009	2711	2976	2123	4260	2967	1347	2790	1565	1850	1705	2274	1956	3134	2823	1553	3943	3118	2443	2066	3294	3616	2116	1086	1409	3444	3033	1914	4432	306	118	1372	7455
3,4-dihydroxyhydrocinnamic acid	673176	179	34133	86:57.0 88:2.0 89:62.0 91:247.0 93:29.0 95:307.0 98:55.0 100:233.0 101:210.0 103:148.0 104:129.0 105:148.0 107:217.0 108:38.0 109:71.0 110:8.0 111:71.0 112:54.0 113:469.0 114:111.0 115:183.0 116:91.0 117:147.0 119:382.0 120:201.0 121:24.0 122:57.0 123:94.0 126:18.0 129:72.0 130:135.0 131:466.0 134:44.0 135:65.0 136:344.0 137:95.0 139:47.0 140:6.0 141:102.0 142:161.0 143:60.0 144:161.0 146:24.0 14…	348154	C10447	DZAUWHJDUNRCTF-UHFFFAOYSA-N	0.84	0	1375509	12973	397049	1479284	57583	4970	1233349	420939	27128	24236	12239	113997	1347730	79932	22628	122698	28409	24155	5648	1228395	12741	9222	25669	18783	24029	221308	74167	673684	790510	2016990	1232485	693349	657782	103003	75212	7821	64620	6648	254314	9213
3,4-dihydroxycinnamic acid	748847	219	16546	85:1780.0 86:20.0 87:24.0 88:1684.0 89:4807.0 90:388.0 91:739.0 92:85.0 93:33.0 94:49.0 95:700.0 97:1259.0 98:647.0 99:413.0 101:816.0 102:963.0 103:1469.0 104:421.0 105:1160.0 106:113.0 107:601.0 108:95.0 109:940.0 110:199.0 111:64.0 112:116.0 113:303.0 115:3976.0 116:1253.0 117:4062.0 118:601.0 119:1232.0 120:1.0 121:523.0 122:115.0 123:7.0 124:63.0 125:51.0 127:648.0 128:467.0 129:1690.0 130:4…	689043	C01197	QAIPRVGONGVQAS-DUXPYHPUSA-N	0.42	0	3230	1410	2463	3923	1122	1758	3051	2836	1531	2776	1269	1864	2989	2841	2077	1091	920	1677	2324	3514	1362	3248	890	2301	1751	6010	1608	2637	4155	2897	2855	1847	1836	3037	1164	1762	763	4840	2169	1929
3,4-dihydroxybenzoic acid	620200	193	16806	89:294.0 91:134.0 93:177.0 95:84.0 99:23.0 101:1.0 105:717.0 106:34.0 107:597.0 108:35.0 109:434.0 110:81.0 114:14.0 116:27.0 119:71.0 121:58.0 122:15.0 123:183.0 127:81.0 130:7.0 133:258.0 134:189.0 135:133.0 136:54.0 137:2319.0 138:203.0 139:29.0 141:73.0 142:124.0 143:107.0 144:53.0 149:8.0 151:103.0 152:33.0 157:315.0 160:202.0 161:42.0 162:19.0 163:433.0 164:141.0 165:2034.0 166:273.0 167:72…	72	C00230	YQUVCSBJEUQKSH-UHFFFAOYSA-N	0.28	0	51413	6217	13668	42160	15251	14558	44917	36386	42190	24411	19850	23932	31956	6152	31335	22396	11309	10620	25163	45273	22200	41886	22364	68201	29952	18543	13544	62000	54897	69156	48339	26827	13462	15991	13955	17601	391	1296	18535	35463
3-(4-hydroxyphenyl)propionic acid	598147	179	110341	85:576.0 87:354.0 88:431.0 89:1639.0 90:679.0 91:2659.0 92:227.0 93:254.0 95:404.0 97:47.0 99:124.0 101:578.0 102:306.0 104:649.0 105:1003.0 107:471.0 110:63.0 115:641.0 116:1512.0 117:868.0 118:186.0 119:494.0 120:81.0 121:377.0 123:164.0 124:62.0 127:41.0 131:1081.0 133:818.0 134:134.0 135:1445.0 136:155.0 137:195.0 140:1363.0 141:53.0 145:234.0 147:1204.0 148:168.0 149:1752.0 150:374.0 151:130…	10394	C01744	NMHMNPHRMNGLLB-UHFFFAOYSA-N	0.94	0.23	150218	920024	432361	559688	58577	87457	170894	156558	172005	110752	119387	98497	185878	12794	126521	100219	146809	34921	94880	170321	93535	103979	83462	114075	229295	76616	54666	188205	183910	234908	52945	53786	123247	51600	92402	41304	93083	16215	119663	117810
2-picolinic acid	383668	180	121035	86:84.0 92:84.0 93:239.0 95:84.0 106:547.0 108:158.0 109:135.0 115:87.0 120:119.0 122:176.0 124:29.0 125:35.0 128:45.0 136:2525.0 137:206.0 138:56.0 142:41.0 148:162.0 150:356.0 151:110.0 152:531.0 153:126.0 157:71.0 166:36.0 167:140.0 180:3764.0 181:391.0 182:142.0 204:31.0 219:28.0 226:18.0 232:21.0 257:32.0 267:68.0 287:53.0 288:18.0 289:25.0 293:23.0 294:25.0 298:27.0 322:15.0 332:14.0 472:15…	1018	C10164	SIOXPEMLGUPBBT-UHFFFAOYSA-N	0.01	0.2	957	1764	1395	1791	1306	1191	778	1344	725	1572	552	1900	1768	3008	1511	580	1059	1129	656	1167	1372	699	338	1244	1235	1271	957	919	1351	916	2327	986	1448	1097	1617	3639	968	277	1141	1426
2-monoolein	945300	129	134406	85:303.0 86:170.0 87:451.0 88:282.0 89:1209.0 91:276.0 93:762.0 94:318.0 95:1457.0 96:676.0 97:1770.0 98:462.0 99:761.0 101:2625.0 102:550.0 103:20868.0 104:1612.0 105:1283.0 106:173.0 107:434.0 108:163.0 109:753.0 110:365.0 111:534.0 112:164.0 113:1037.0 115:470.0 116:275.0 117:1823.0 118:183.0 119:440.0 120:109.0 121:586.0 123:443.0 125:137.0 126:206.0 128:174.0 129:18683.0 130:2393.0 131:3802.…	5319879		UPWGQKDVAURUGE-KTKRTIGZSA-N	0.81	0	128478	22189	48131	64599	65117	11773	10795	27095	65604	74998	50012	31798	171587	52593	32103	26427	8776	20203	24892	29631	33893	73288	27017	33018	32184	87020	17777	33638	90703	46640	65276	28348	44787	50298	14565	36169	13772	5243	40323	58545
2-ketoisocaproic acid	310761	89	208	85:129.0 86:213.0 88:136.0 89:5113.0 90:387.0 91:282.0 98:690.0 99:3574.0 100:584.0 101:86.0 103:142.0 104:34.0 105:37.0 110:2780.0 111:140.0 113:196.0 114:693.0 115:2338.0 116:377.0 117:158.0 118:61.0 119:177.0 123:21.0 126:192.0 128:49.0 134:174.0 135:32.0 140:183.0 143:201.0 150:40.0 151:21.0 153:18.0 154:48.0 156:80.0 157:32.0 158:269.0 159:57.0 162:23.0 167:25.0 172:42.0 173:31.0 174:195.0 1…	70	C00233	BKAJNAXTPSGJCU-UHFFFAOYSA-N	0.1	0.96	3178	1316	1640	969	1608	1465	2165	3747	2363	1657	1098	5046	2863	10317	1645	1626	1158	3557	2754	1432	1338	1916	590	2072	2405	1616	3625	2388	2375	1694	1064	1178	2056	2668	1783	1620	1277	1838	5437	1725
2-hydroxyvaleric acid	309587	131	25922	85:783.0 86:12.0 89:96.0 95:343.0 99:185.0 101:10.0 110:16.0 113:33.0 115:380.0 116:57.0 117:78.0 127:85.0 130:28.0 131:2537.0 132:259.0 133:199.0 147:2527.0 148:299.0 149:168.0 189:23.0 200:55.0 204:42.0 205:87.0 247:159.0	98009		JRHWHSJDIILJAT-UHFFFAOYSA-N	0.14	0.53	8555	8207	8523	6344	2414	6285	5455	4729	4225	4845	3084	8930	6275	5131	7692	5668	3718	5775	5166	5785	3739	3373	2484	7301	5902	6558	12245	8342	4863	6759	5442	3844	6964	10213	8394	7487	4014	3256	9444	5729
2-hydroxyisovaleric acid	280835	145	170069	87:587.0 89:557.0 91:409.0 96:190.0 98:189.0 99:1642.0 101:1126.0 103:1385.0 104:607.0 105:630.0 106:109.0 109:118.0 112:182.0 113:479.0 115:2063.0 118:1242.0 119:483.0 120:140.0 123:36.0 124:13.0 126:256.0 128:210.0 129:1513.0 131:3446.0 132:418.0 133:6444.0 136:76.0 139:32.0 141:44.0 143:692.0 144:1141.0 145:57367.0 146:9593.0 147:35591.0 148:7582.0 149:4899.0 150:445.0 151:226.0 152:53.0 153:7…	99823		NGEWQZIDQIYUNV-UHFFFAOYSA-N	0.52	0.29	87240	20822	46870	36669	76709	13820	46480	61505	55760	17797	32051	21615	64481	42119	23772	51555	10929	15771	14663	69955	25487	13749	27153	30952	22883	25193	27899	54942	28492	52786	11405	32863	85589	48397	7842	18632	30860	62073	98930	9346
2-hydroxyglutaric acid	506306	247	2000	85:987.0 86:115.0 99:30.0 101:119.0 103:121.0 105:91.0 115:9.0 116:84.0 117:39.0 129:3826.0 130:487.0 131:370.0 132:6.0 133:412.0 134:38.0 146:11.0 147:1685.0 148:252.0 149:537.0 150:24.0 157:1113.0 158:97.0 159:129.0 163:13.0 172:4.0 184:12.0 203:612.0 204:140.0 217:9.0 218:20.0 231:219.0 247:1048.0 248:174.0 249:17.0 349:124.0 350:3.0 354:11.0 477:11.0 479:1.0	43	C02630	HWXBTNAVRSUOJR-UHFFFAOYSA-N	0.81	0.95	3802	2623	4377	11433	4056	1615	1233	1060	2298	3352	1405	989	2403	4053	1552	1814	923	1677	3789	3279	1853	2378	658	3256	4583	898	2794	4018	4753	4569	1393	2325	1193	954	644	1462	32827	2948	1407	827
2-hydroxybutanoic acid	258161	131	40	86:245.0 87:1207.0 89:112.0 95:545.0 97:102.0 99:553.0 101:976.0 103:517.0 104:78.0 112:23.0 113:68.0 114:20.0 115:1186.0 116:223.0 117:711.0 125:24.0 129:273.0 131:25648.0 132:2895.0 133:3706.0 134:1175.0 137:61.0 138:29.0 139:26.0 143:727.0 144:93.0 145:26.0 147:22332.0 148:3774.0 149:2177.0 150:118.0 151:24.0 169:35.0 175:94.0 184:455.0 189:64.0 190:978.0 191:270.0 192:77.0 195:16.0 205:1662.0…	440864	C05984	AFENDNXGAFYKQO-VKHMYHEASA-N	0.77	0.75	106100	12637	33671	14682	140795	12074	13605	59856	10552	4957	10333	9094	28647	15446	8084	98342	5659	5895	5948	50066	17099	6326	6480	19149	7203	9044	8686	32556	10459	57501	4831	102247	65736	16877	3298	10175	92736	95378	310502	4260
2-deoxyuridine	348950	155	379168	92:458.0 94:232.0 98:357.0 99:910.0 104:788.0 108:96.0 111:198.0 113:785.0 124:194.0 126:131.0 130:1074.0 138:164.0 139:232.0 143:145.0 146:436.0 150:158.0 154:75.0 155:3016.0 156:449.0 157:599.0 168:110.0 169:3071.0 170:2864.0 183:306.0 186:181.0 271:72.0 272:46.0 296:29.0 304:45.0 317:79.0 327:54.0 331:24.0 362:34.0 372:43.0 379:28.0 385:36.0 394:30.0 399:30.0 416:32.0 425:23.0 452:32.0 483:25.0	13712	C00526	MXHRCPNRJAMMIM-SHYZEUOFSA-N	0.33	0.29	524	7513	4428	4924	4114	4490	7469	2819	3130	2768	1630	2995	3707	11134	4514	2083	1454	6867	6409	3088	6022	6978	3204	4455	3645	3746	3709	3693	9131	5282	4823	3137	10830	2255	1636	4085	1934	317	6153	7018
2-deoxytetronic acid	433456	189	1208	85:3678.0 86:419.0 87:1070.0 88:693.0 89:3868.0 90:231.0 91:269.0 92:61.0 94:196.0 96:136.0 97:220.0 98:279.0 99:1268.0 100:276.0 101:10175.0 102:1066.0 103:3549.0 104:443.0 105:707.0 106:118.0 107:102.0 108:142.0 109:54.0 111:177.0 112:57.0 113:377.0 114:530.0 115:1621.0 116:869.0 117:12125.0 118:1194.0 119:1640.0 120:183.0 121:154.0 123:18.0 127:243.0 129:6961.0 130:984.0 131:3106.0 132:474.0 1…	150929		DZAIOXUZHHTJKN-UHFFFAOYSA-N	0.43	0.1	7937	1289	3403	3888	4342	1512	6004	4597	3539	1236	2255	1906	4527	974	1421	2499	2354	423	1717	5371	5411	2160	2448	5122	4675	1317	2174	7023	6364	3968	2623	3629	4793	1700	1613	1897	630	1004	2943	3077
2-deoxypentitol	521785	231	21714	86:46.0 88:28.0 89:367.0 90:3.0 95:6.0 98:2.0 99:11.0 100:23.0 101:430.0 103:1724.0 104:27.0 108:40.0 114:18.0 115:39.0 116:38.0 117:1441.0 118:62.0 119:35.0 129:1593.0 131:604.0 133:684.0 134:7.0 143:75.0 145:46.0 147:2914.0 148:403.0 149:190.0 155:107.0 159:21.0 163:94.0 171:245.0 172:17.0 174:77.0 175:47.0 189:139.0 190:8.0 200:16.0 203:169.0 204:37.0 205:891.0 206:114.0 207:17.0 217:14.0 231:…	249377		ZDAWZDFBPUUDAY-UHFFFAOYSA-N	0.13	0.06	1342	628	1066	1118	728	616	1026	1793	959	867	883	297	1256	391	637	1052	1030	659	806	1525	1069	914	434	1628	967	649	636	1648	1044	1546	568	1081	1042	422	644	740	278	328	48	1828
2'-deoxyguanosine	959764	280	170724	85:251.0 86:217.0 87:181.0 89:341.0 90:63.0 92:102.0 96:159.0 98:100.0 99:1237.0 100:514.0 101:1098.0 103:6289.0 104:448.0 110:102.0 111:581.0 112:89.0 113:464.0 114:157.0 115:340.0 116:126.0 117:1220.0 118:188.0 124:39.0 125:158.0 126:91.0 127:438.0 128:143.0 130:126.0 131:822.0 132:312.0 133:841.0 134:272.0 135:174.0 136:58.0 137:33.0 138:151.0 140:13.0 141:70.0 142:73.0 143:337.0 144:91.0 145:…	187790	C00330	YKBGVTZYEHREMT-KVQBGUIXSA-N	0.35	0	3446	1640	390	1069	1549	643	290	306	1445	600	556	133	702	2161	1214	1695	88	3156	3106	1219	3080	1726	1488	1486	1844	1132	143	2084	2943	3136	1941	829	4742	221	426	1232	1122	44	2478	2822
2-deoxyerythritol	354388	117	34100	85:23.0 87:267.0 88:102.0 90:44.0 92:50.0 94:2.0 95:128.0 96:46.0 97:56.0 98:29.0 99:824.0 101:852.0 102:113.0 103:2298.0 104:36.0 105:287.0 107:3149.0 109:28.0 110:1239.0 111:502.0 112:5.0 113:172.0 114:200.0 115:31.0 116:4912.0 117:13201.0 118:1597.0 119:723.0 120:94.0 126:363.0 127:363.0 128:27.0 129:1313.0 130:120.0 131:815.0 133:1914.0 134:97.0 135:459.0 136:133.0 138:4.0 139:10.0 142:71.0 1…	18302		ARXKVVRQIIOZGF-UHFFFAOYSA-N	0.42	0.18	13645	6877	7491	7513	4380	8993	7034	6075	3571	3560	3476	9975	9768	3403	2583	3587	11350	5203	4756	3653	7827	4266	3395	6038	14739	4586	7068	9999	7254	9090	5908	3694	10828	11766	5166	6555	1774	3707	5371	3555
2-deoxyadenosine	917249	192	188304	85:302.0 88:81.0 93:88.0 96:36.0 98:78.0 99:455.0 100:191.0 101:616.0 102:112.0 103:3488.0 104:332.0 105:177.0 108:90.0 109:143.0 110:137.0 111:422.0 113:30.0 115:233.0 117:795.0 119:56.0 121:32.0 122:52.0 123:69.0 124:22.0 125:103.0 127:147.0 129:438.0 133:435.0 134:45.0 136:89.0 137:58.0 138:123.0 142:109.0 143:173.0 144:45.0 145:206.0 146:237.0 147:414.0 149:218.0 152:19.0 155:426.0 158:35.0 1…	636		OLXZPDWKRNYJJZ-UHFFFAOYSA-N	0.24	0	8291	4944	350	3655	4532	3443	7897	452	4583	2390	1624	16333	3654	6299	3688	2793	2263	10827	15305	2774	6986	6276	4452	3169	8728	2517	1765	3919	6835	7569	4583	2703	5290	454	1690	2430	293	2994	4780	8325
2-aminophenol	438445	150	124439	90:40.0 91:610.0 92:264.0 102:330.0 103:101.0 105:91.0 106:500.0 107:111.0 118:53.0 120:128.0 121:114.0 131:155.0 132:81.0 134:79.0 135:2899.0 136:412.0 137:172.0 146:31.0 148:117.0 149:172.0 150:5118.0 151:615.0 152:196.0 162:37.0 163:28.0 164:126.0 165:1107.0 166:269.0 167:47.0 176:23.0 178:153.0 179:62.0 180:150.0 181:99.0 194:63.0 222:111.0 223:30.0 237:13.0 238:764.0 239:206.0 240:99.0 252:3…	5801		CDAWCLOXVUBKRW-UHFFFAOYSA-N	0.18	0	649	3872	1179	975	2196	1193	432	464	608	1043	1094	1329	1473	615	1867	2177	1125	1509	1140	518	5079	1865	2105	4306	882	1138	518	3357	852	1532	718	777	856	1068	477	2671	537	340	495	1079
2-aminobutyric acid	285825	130	160842	85:2349.0 86:7340.0 87:2626.0 88:1175.0 89:967.0 93:154.0 94:231.0 95:643.0 96:816.0 98:6012.0 99:1182.0 100:17704.0 101:5509.0 102:2953.0 103:8799.0 104:770.0 105:1178.0 107:62.0 109:384.0 111:91.0 112:296.0 113:378.0 114:7166.0 115:3812.0 116:1978.0 117:3932.0 118:356.0 119:558.0 120:162.0 126:773.0 128:1855.0 129:1466.0 130:243176.0 131:34789.0 132:12476.0 133:8893.0 134:1271.0 135:699.0 136:8…	6657	C02721	QWCKQJZIFLGMSD-UHFFFAOYSA-N	0.54	0.49	61257	10955	126340	38916	87443	16003	128559	92010	56507	75552	82101	84889	292387	34994	44794	239695	30198	15238	9741	53913	112683	19141	42175	91217	94043	71436	30951	119604	41737	106458	94930	80712	73445	59471	137886	18965	99989	102414	229916	26531
2,8-dihydroxyquinoline	626989	290	104444	87:102.0 88:99.0 89:206.0 90:68.0 95:23.0 101:41.0 102:51.0 103:154.0 104:35.0 114:72.0 115:280.0 116:203.0 117:27.0 128:71.0 129:93.0 131:54.0 132:39.0 133:73.0 135:37.0 140:31.0 141:30.0 142:66.0 143:123.0 148:163.0 150:67.0 151:27.0 156:46.0 158:46.0 159:349.0 160:63.0 161:38.0 162:28.0 169:14.0 170:25.0 172:110.0 173:26.0 174:28.0 176:19.0 180:24.0 186:82.0 187:385.0 188:185.0 189:37.0 190:40…	97250	C06342	ZXZKYYHTWHJHFT-UHFFFAOYSA-N	0.2	0	1671	1035	2342	2450	422	1014	1347	893	1754	1032	456	2159	749	3750	1428	700	1001	1144	872	1187	567	986	582	1008	1593	6804	1184	713	902	779	867	710	1262	2396	5007	874	3303	410	1053	1685
2,6-diaminopimelic acid	686035	200	133922	86:650.0 90:154.0 96:107.0 97:67.0 98:89.0 99:196.0 100:2211.0 102:795.0 107:185.0 108:159.0 109:165.0 110:472.0 111:139.0 113:71.0 114:584.0 115:245.0 117:308.0 122:203.0 125:42.0 126:1004.0 128:5835.0 129:1002.0 130:287.0 131:610.0 133:758.0 134:76.0 140:163.0 142:619.0 143:229.0 144:338.0 146:199.0 147:3426.0 148:745.0 154:766.0 155:977.0 160:71.0 166:60.0 170:89.0 171:393.0 172:253.0 177:34.0…	865		GMKMEZVLHJARHF-UHFFFAOYSA-N	0.25	0	1517	1066	1166	1770	544	949	1532	1061	1339	1958	1256	3627	1333	6257	1221	839	850	437	1657	1338	782	1042	684	1077	1137	1044	11243	1452	1654	1750	1269	818	2206	5134	1459	1702	3669	1281	1540	1084
2,4-diaminobutyric acid	570766	174	104406	86:4905.0 87:90.0 88:301.0 91:62.0 94:20.0 98:160.0 99:142.0 100:4281.0 101:897.0 102:1077.0 103:277.0 112:246.0 113:93.0 114:435.0 115:672.0 116:612.0 118:65.0 119:157.0 126:145.0 127:154.0 128:428.0 129:233.0 130:1039.0 131:479.0 132:493.0 133:942.0 134:73.0 135:57.0 139:76.0 142:61.0 145:112.0 146:917.0 147:2627.0 148:46.0 149:79.0 155:335.0 157:53.0 158:170.0 170:85.0 171:44.0 172:682.0 174:1…	134490	C03283	OGNSCSPNOLGXSM-VKHMYHEASA-N	0.44	0.01	2237	4147	9071	7911	5358	10646	8612	10012	14218	6013	12170	10130	7535	3212	7238	3336	5212	8111	11705	8390	9818	11256	4657	8606	15248	15393	389	13554	16735	17502	4689	4314	10888	6394	5902	11392	2726	394	612	12174
2,3-dihydroxybutanoic acid	384796	292	31743	87:433.0 88:146.0 89:211.0 95:50.0 101:566.0 102:5460.0 103:1435.0 106:74.0 107:123.0 108:62.0 110:72.0 115:2014.0 116:220.0 117:16374.0 118:1491.0 119:1168.0 123:31.0 124:14.0 129:1092.0 130:2991.0 131:2301.0 132:1136.0 133:5833.0 136:86.0 137:44.0 139:22.0 143:92.0 147:7382.0 148:1170.0 149:1275.0 150:167.0 151:189.0 161:37.0 162:19.0 163:129.0 175:52.0 177:157.0 178:19.0 179:13.0 180:15.0 183:…	250402		LOUGYXZSURQALL-UHFFFAOYSA-N	0.04	0.93	164	117	273	189	131	123	159	123	177	119	190	129	151	134	103	185	63	59	54	214	181	103	68	109	232	172	227	152	102	123	125	116	2169	119	98	117	432	54	319	123
1-monostearin	959214	203	648	85:2387.0 86:245.0 88:342.0 89:880.0 90:108.0 91:126.0 93:404.0 94:183.0 95:2259.0 96:306.0 97:2167.0 98:609.0 99:768.0 100:91.0 101:4087.0 102:436.0 103:4290.0 104:462.0 105:416.0 106:95.0 107:246.0 108:39.0 109:1410.0 110:130.0 111:1003.0 112:196.0 113:337.0 114:74.0 115:511.0 116:2218.0 117:3517.0 118:444.0 119:328.0 120:48.0 121:179.0 122:22.0 123:677.0 124:97.0 125:278.0 128:153.0 129:4761.0…	24699	D01947	VBICKXHEKHSIBG-UHFFFAOYSA-N	0.76	0.81	5394	636	1339	1729	1357	875	3207	358	2074	6225	2076	1017	10476	1976	1378	1283	1097	296	2470	3290	3056	5422	1281	981	2186	3350	4523	1529	3086	540	1829	1384	2046	2846	1882	2301	5562	572	5631	1642
1-monopalmitin	901749	371	2070	85:11049.0 86:1066.0 87:1727.0 88:2503.0 89:4332.0 90:546.0 91:849.0 93:1712.0 94:656.0 95:11870.0 96:1156.0 97:8236.0 98:3082.0 99:3966.0 100:546.0 101:20046.0 102:2216.0 103:20674.0 104:2095.0 105:2096.0 106:183.0 107:1123.0 108:131.0 109:6523.0 110:712.0 111:3012.0 112:681.0 113:1739.0 114:217.0 115:2374.0 116:10634.0 117:15865.0 118:1742.0 119:1613.0 120:72.0 121:1202.0 122:204.0 123:3774.0 1…	14900	C01885	QHZLMUACJMDIAE-UHFFFAOYSA-N	0.96	0.95	16850	2693	3447	5497	3833	4296	2776	2876	6532	18988	4350	1906	38870	3623	4498	3132	2535	5057	6583	4890	4607	20944	2347	4167	3965	7849	8226	4089	9693	5727	4379	3972	3523	5734	3552	3170	2333	550	6679	5035
1-monoolein	952141	129	505158	86:790.0 88:1632.0 89:6586.0 90:919.0 91:11406.0 92:3172.0 93:10560.0 94:6378.0 95:26193.0 96:7133.0 97:9517.0 100:671.0 101:6530.0 103:55846.0 106:2259.0 107:5303.0 108:2871.0 109:11503.0 111:287.0 112:1240.0 113:2105.0 114:501.0 115:4732.0 116:6013.0 117:16760.0 119:6635.0 120:2248.0 122:2083.0 123:627.0 124:2084.0 125:1901.0 127:1000.0 129:105586.0 130:18619.0 131:6286.0 132:6624.0 133:6960.0 …	5283468		RZRNAYUHWVFMIP-KTKRTIGZSA-N	0.89	0.33	374603	62007	63606	127663	81723	40963	18910	44708	179273	277180	69614	37476	548314	60525	89974	49327	29767	71985	100085	68766	48166	252871	53456	81196	100386	137924	118381	108737	225075	111847	95627	62891	45793	150185	42925	46687	32186	3465	84094	121182
1-methylhydantoin	381440	100	110036	86:1551.0 89:67.0 92:64.0 93:244.0 100:13542.0 101:1544.0 102:113.0 104:75.0 105:39.0 106:68.0 107:103.0 108:81.0 110:147.0 113:246.0 114:206.0 121:84.0 123:35.0 124:40.0 127:1843.0 128:574.0 130:452.0 136:87.0 138:70.0 139:109.0 141:574.0 142:170.0 143:1704.0 146:44.0 148:147.0 151:51.0 154:94.0 161:40.0 163:65.0 167:24.0 168:30.0 169:69.0 170:112.0 171:10295.0 172:987.0 173:331.0 174:10.0 175:1…	69217		RHYBFKMFHLPQPH-UHFFFAOYSA-N	0.34	0.03	9354	14204	6534	7116	5766	9588	6195	7011	2012	4820	5923	19359	9757	8577	11127	6091	3779	8679	6824	11294	170818	5433	3741	143489	9087	8359	10862	565	1725	8350	5794	4374	10955	12547	8134	11642	19478	6363	19758	9827
1-methylgalactose	664807	204	477	85:1337.0 86:428.0 87:1347.0 88:1090.0 89:3019.0 91:610.0 93:41.0 94:89.0 97:302.0 99:215.0 101:3717.0 102:1142.0 103:8622.0 104:351.0 105:563.0 106:96.0 107:54.0 112:185.0 113:798.0 114:291.0 115:498.0 116:2211.0 117:5393.0 118:627.0 119:1251.0 122:9.0 125:47.0 127:727.0 128:914.0 129:5558.0 130:1595.0 131:2661.0 132:304.0 133:5828.0 135:519.0 136:68.0 137:60.0 138:73.0 140:44.0 142:77.0 143:134…	2108		HOVAGTYPODGVJG-UHFFFAOYSA-N	0	0.26	7182	8238	2997	4529	2313	4413	2493	1496	4204	1996	4024	2041	2371	15540	3410	1559	1882	1566	6590	1193	4847	3035	1182	10171	3093	3579	4384	2608	5058	2241	2199	1691	4499	2994	3902	4428	10232	4966	3316	2124
1,5-anhydroglucitol	632918	217	171285	85:3071.0 86:461.0 87:660.0 88:778.0 89:4239.0 93:66.0 94:369.0 97:1353.0 98:407.0 99:2106.0 102:1632.0 103:18691.0 104:1497.0 105:1592.0 106:221.0 108:111.0 109:230.0 110:178.0 111:1535.0 112:298.0 114:366.0 115:3648.0 116:3447.0 117:2075.0 118:1333.0 119:1915.0 120:236.0 125:266.0 127:1017.0 128:194.0 129:15313.0 130:2681.0 131:6113.0 132:96.0 133:12489.0 135:1239.0 136:193.0 137:131.0 138:16.0…	64960	C07326	MPCAJMNYNOGXPB-SLPGGIOYSA-N	0.16	0.28	2391	911	58883	1698	5870	55899	1684	2990	1494	39378	1517	952	1386	758	2275	2989	2736	3576	934	1329	823	4094	2370	51652	2750	505	1283	5199	19052	1476	962	2728	4508	706	1393	1516	6237	942	5580	4753
1,2,4-benzenetriol	521803	239	26704	85:1133.0 87:801.0 88:613.0 89:323.0 90:201.0 91:4251.0 92:550.0 93:2640.0 94:75.0 95:856.0 96:293.0 97:2058.0 98:1945.0 99:1192.0 102:257.0 103:4006.0 104:998.0 105:3856.0 106:458.0 107:1359.0 108:659.0 109:1498.0 110:602.0 111:733.0 112:2965.0 113:841.0 114:144.0 115:1465.0 116:550.0 117:1017.0 118:106.0 119:3737.0 120:807.0 121:962.0 122:372.0 123:430.0 124:258.0 126:4.0 130:103.0 131:2962.0 1…	10787	C02814	GGNQRNBDZQJCCN-UHFFFAOYSA-N	0.41	0	4410	87	4141	1819	43	2110	3012	5740	85	907	1762	133	5560	3717	5946	2483	1695	3160	1901	105	1706	1932	1121	1455	1555	3455	6405	79	1112	2831	5256	3984	3574	117	2468	4889	2787	454	189	1090
513138	700895	174	513138	85:878.0 86:28054.0 88:1826.0 97:260.0 98:434.0 99:677.0 100:8358.0 102:3866.0 110:271.0 112:2298.0 113:1459.0 114:95.0 115:691.0 116:1324.0 121:149.0 126:622.0 128:632.0 130:2666.0 131:688.0 135:517.0 140:612.0 142:139.0 143:782.0 148:208.0 154:788.0 159:92.0 160:1946.0 162:384.0 172:767.0 173:73.0 174:91894.0 175:17310.0 176:6169.0 177:325.0 193:214.0 200:693.0 212:236.0 213:132.0 214:99.0 242:…				0.77	0	9025	199658	155267	85482	642342	1144551	465079	260738	668745	560906	713757	185384	393163	49926	785134	965588	204301	745823	522788	164530	904064	1442418	757989	2212365	1320606	242627	117559	1622241	1783182	581031	4010	592169	22969	196794	495868	460551	1213	1772	89807	1237262
512338	376871	131	512338	85:368.0 87:295.0 90:55.0 106:86.0 111:1060.0 113:6480.0 114:316.0 115:660.0 128:216.0 131:14627.0 132:1723.0 143:138.0 144:126.0 145:273.0 157:169.0 160:919.0 161:241.0 176:53.0 185:1824.0 186:402.0 187:35.0 188:31.0 189:90.0 190:72.0 198:47.0 201:1258.0 202:156.0 203:2184.0 204:377.0 205:123.0 217:86.0 219:40.0 220:57.0 221:70.0 226:66.0 227:59.0 233:21.0 234:41.0 235:47.0 236:71.0 240:38.0 247…				0.24	0.06	31436	23763	29486	21815	10648	16748	18757	18326	14382	9694	12646	22885	24250	22023	15667	20094	9888	20007	20329	30723	9607	13678	15328	19947	8988	20453	33354	20868	17721	23954	16504	12616	26083	30032	11299	21237	14097	15166	26914	14703
509957	506905	105	509957	85:1061.0 86:1136.0 87:3392.0 88:794.0 91:146.0 100:2870.0 101:1057.0 102:1576.0 103:12767.0 104:1249.0 105:34020.0 106:2786.0 107:326.0 108:340.0 109:413.0 112:1160.0 115:1023.0 116:2284.0 118:1134.0 119:907.0 126:93.0 129:4677.0 131:3110.0 140:845.0 142:77.0 143:266.0 144:503.0 145:8212.0 146:1105.0 147:59196.0 148:6917.0 149:3380.0 150:145.0 154:157.0 157:183.0 160:548.0 161:279.0 162:373.0 16…				0	0.15	12580	10635	7401	8815	7419	6366	4615	18301	10860	3942	4402	4326	5423	9009	6390	3243	3713	5151	29498	4767	6071	38172	4300	7743	12166	6327	4102	6422	57777	8907	6455	3044	12032	6652	3519	5850	2353	2077	6115	12994
509844	283819	88	509844	87:990.0 88:13731.0 89:402.0 101:3002.0 109:130.0 113:142.0 115:577.0 126:80.0 129:1292.0 141:128.0 143:363.0 144:185.0 159:141.0 160:832.0 173:41.0 201:1455.0 202:166.0 209:76.0				0.77	0.8	37481	30965	26903	26973	11830	26827	23504	19258	17646	16335	27408	29401	30869	24157	9575	15882	11803	27904	16717	25920	18970	16392	10550	18365	23709	28895	26217	23096	13414	31604	19323	17724	31683	43126	22789	31054	18838	11165	36611	21795
509528	703963	318	509528	87:1334.0 89:268.0 99:1997.0 100:1448.0 101:1056.0 103:9343.0 105:301.0 113:830.0 114:419.0 115:364.0 119:1027.0 121:65.0 126:532.0 127:1059.0 129:4512.0 130:611.0 131:1548.0 133:8080.0 134:374.0 135:1011.0 136:259.0 141:349.0 142:445.0 143:1410.0 144:552.0 147:30126.0 148:5580.0 149:2655.0 150:532.0 152:256.0 156:164.0 157:1318.0 167:124.0 170:328.0 175:455.0 177:251.0 179:34.0 181:77.0 183:159.…				0.2	0.83	79	210	90	73	99	119	91	55	92	158	193	211	100	327	86	153	56	66	125	141	95	165	102	155	45	88	112	98	184	132	56	45	540	313	77	192	723	121	401	82
505152	853407	201	505152	85:798.0 87:327.0 88:507.0 89:5863.0 90:822.0 91:444.0 94:249.0 97:1835.0 98:321.0 100:347.0 101:4632.0 103:6834.0 105:6809.0 111:1713.0 113:226.0 114:755.0 115:1737.0 116:4349.0 117:10843.0 118:1410.0 126:215.0 127:803.0 128:511.0 129:3086.0 130:748.0 131:3645.0 132:3794.0 133:2907.0 134:437.0 137:172.0 140:250.0 142:684.0 143:847.0 145:1228.0 146:6676.0 147:6779.0 149:1374.0 152:137.0 154:116.0…				0.16	0	21	269	1640	876	252	485	757	648	153	747	261	125	116	1295	164	109	309	203	184	642	322	390	29	416	259	1653	237	712	69	70	56	0	284	800	1100	196	251	142	87	408
505148	793844	400	505148	85:423.0 86:404.0 87:321.0 88:316.0 89:5215.0 90:398.0 91:1136.0 92:751.0 95:531.0 99:468.0 100:282.0 101:1039.0 102:389.0 103:8695.0 104:1207.0 105:509.0 110:445.0 113:307.0 115:702.0 116:1126.0 117:16683.0 118:1932.0 120:826.0 121:89.0 122:671.0 123:231.0 126:142.0 128:210.0 129:1230.0 130:979.0 131:6388.0 132:1178.0 133:4725.0 134:994.0 135:1415.0 138:106.0 143:1162.0 145:298.0 147:42378.0 148…				0.18	0	562	405	588	390	400	655	741	447	427	272	311	263	599	182	672	500	304	332	508	277	512	593	403	649	387	167	202	485	706	658	512	385	736	618	153	394	21	38	680	576
505143	532730	272	505143	85:4050.0 86:1057.0 87:2639.0 88:2539.0 89:49386.0 90:4048.0 91:1173.0 92:351.0 93:307.0 97:356.0 98:3403.0 99:2880.0 100:5892.0 101:40094.0 102:7058.0 103:31256.0 104:2957.0 105:5715.0 106:423.0 107:144.0 108:112.0 110:8378.0 111:1740.0 112:1424.0 113:1404.0 114:11242.0 115:4837.0 116:2951.0 117:8786.0 118:1123.0 119:6374.0 120:399.0 121:362.0 124:199.0 125:227.0 126:18784.0 127:2077.0 128:2368.…				0.13	0	316	330	3896	1189	103	218	855	2324	110	256	142	166	346	295	363	213	256	281	251	191	177	684	100	441	316	476	321	376	633	359	268	153	148	143	232	222	172	120	127	248
488020	825890	225	488020	85:366.0 91:5471.0 92:1226.0 93:1908.0 94:261.0 95:953.0 97:774.0 99:746.0 103:1692.0 104:623.0 105:2970.0 106:2624.0 107:1527.0 109:685.0 111:498.0 113:367.0 115:851.0 116:375.0 117:3258.0 118:634.0 119:1935.0 120:1331.0 121:588.0 124:81.0 129:2967.0 130:841.0 131:7709.0 132:1223.0 133:820.0 135:487.0 136:165.0 137:214.0 143:1549.0 144:377.0 145:3685.0 146:768.0 147:3349.0 148:721.0 149:1180.0 1…				0	0.94	139	34	77	46	20	50	105	55	39	70	97	73	104	48	55	74	35	100	93	74	60	44	28	107	41	88	147	59	70	58	112	44	109	141	15	90	63	24	151	78
475689	783340	331	475689	85:9781.0 86:2828.0 88:1698.0 90:1123.0 91:14324.0 93:6893.0 97:32961.0 99:4902.0 101:12444.0 102:1444.0 103:47755.0 104:4228.0 105:4330.0 107:3243.0 109:9927.0 113:1693.0 114:1341.0 115:6468.0 116:14218.0 121:2738.0 127:2704.0 128:2682.0 133:15863.0 135:3804.0 136:1095.0 141:1207.0 147:19753.0 148:2375.0 149:17824.0 150:4139.0 151:5451.0 153:2025.0 157:3721.0 163:1641.0 164:952.0 167:1243.0 169:…				0.27	0	464	862	236	344	485	1480	516	251	2158	1071	3032	1733	1021	2094	1327	791	315	541	2116	716	844	1707	571	234	700	1257	2555	510	417	416	218	274	315	2564	354	1398	127	552	399	593
474299	222792	186	474299	85:1367.0 87:1956.0 88:1160.0 89:220.0 90:1983.0 91:494.0 92:257.0 93:515.0 94:588.0 95:328.0 97:1193.0 98:2903.0 100:3031.0 101:1061.0 104:1864.0 106:1868.0 107:500.0 108:2222.0 110:6521.0 111:374.0 114:37.0 115:4491.0 120:1665.0 122:197.0 123:174.0 124:284.0 125:799.0 126:9505.0 127:670.0 128:325.0 130:2467.0 131:7858.0 132:2555.0 133:1980.0 134:6043.0 135:1031.0 136:148.0 137:832.0 138:578.0 1…				0.13	0	2266	921	79	2077	1150	577	709	915	1057	295	1278	627	479	1428	636	260	403	775	1263	1944	611	1047	603	580	682	843	442	724	413	1307	1964	2125	3877	1215	35	1267	1041	200	744	576
473742	383437	140	473742	86:1846.0 88:8679.0 89:1096.0 90:5730.0 91:634.0 100:4487.0 101:2036.0 103:813.0 104:988.0 106:469.0 107:1020.0 109:72.0 110:10434.0 111:665.0 112:1564.0 114:490.0 116:937.0 118:329.0 129:1054.0 130:41594.0 131:5314.0 132:1985.0 133:1072.0 134:7313.0 136:844.0 137:29.0 140:22631.0 141:512.0 147:8114.0 148:1076.0 149:541.0 151:74.0 156:347.0 166:111.0 184:8684.0 185:1947.0 190:426.0 193:181.0 200:…				0.8	0.39	4636	4647	1875	2261	4894	3988	1278	2375	1341	2693	1894	3057	3116	2555	2752	1827	1142	3525	2965	2495	2313	1921	1642	4078	2944	2675	3611	1714	2224	2665	4713	1296	2895	3282	6801	4271	1817	2726	3073	6289
472871	628914	103	472871	85:10126.0 89:172753.0 90:15714.0 91:4625.0 92:890.0 97:7517.0 98:1332.0 99:4674.0 100:9771.0 101:7091.0 103:510380.0 104:38903.0 106:3042.0 109:51.0 111:8004.0 113:6373.0 116:9873.0 117:28203.0 119:13813.0 120:2085.0 126:7310.0 127:2981.0 128:2397.0 129:66369.0 130:38196.0 131:30483.0 132:2722.0 133:55081.0 134:5333.0 135:2573.0 137:798.0 140:2930.0 143:2882.0 145:21096.0 146:2616.0 147:66510.0 …				0.13	0.29	16817	10293	8483	14666	5794	9691	8607	7848	7189	8334	4211	6535	8012	10831	5264	9065	5622	6818	6994	12990	21687	5705	4366	12321	8017	7452	10061	25806	15307	9215	11857	8612	23245	9535	5613	6460	25051	3954	19920	22299
471797	446789	351	471797	86:4816.0 87:12825.0 88:1484.0 95:419.0 96:567.0 100:7120.0 101:6269.0 102:2427.0 104:911.0 105:2149.0 106:206.0 113:1854.0 115:2291.0 116:1330.0 117:8305.0 119:1736.0 120:165.0 131:6295.0 132:8093.0 133:5022.0 141:903.0 144:803.0 145:280.0 147:50894.0 148:6059.0 149:7035.0 150:404.0 158:704.0 159:94.0 160:3273.0 161:1803.0 162:965.0 163:391.0 164:221.0 166:148.0 168:160.0 189:2525.0 190:1460.0 1…				0.51	0.86	1827	2656	1346	517	554	722	1050	730	1088	334	794	890	1451	757	898	294	412	1127	1111	563	966	541	483	1045	753	394	1285	1494	1101	1166	914	836	2608	986	409	2553	533	96	1396	652
471784	284839	171	471784	85:7754.0 86:11335.0 87:3031.0 88:1840.0 94:2507.0 98:1862.0 99:27519.0 100:15285.0 104:464.0 110:2884.0 111:1993.0 112:826.0 113:2163.0 114:3433.0 115:4937.0 116:6381.0 127:2192.0 130:32164.0 131:14637.0 132:14045.0 133:3632.0 134:1167.0 143:1461.0 146:8771.0 147:103964.0 148:16241.0 149:5223.0 155:2252.0 157:4017.0 158:973.0 159:1466.0 169:279.0 171:54160.0 172:10134.0 173:18756.0 174:2592.0 17…				0.03	0.66	8549	536	6161	377	6227	151	5590	317	8020	4301	9069	7210	784	13657	416	204	4111	294	7473	7364	5828	6389	3221	287	6441	466	403	392	796	8921	310	5121	486	9834	6338	7552	14396	128	8296	5373
470262	778487	206	470262	85:391.0 86:1010.0 87:785.0 88:747.0 89:3079.0 90:2405.0 91:1763.0 97:339.0 98:1274.0 100:780.0 101:523.0 102:4555.0 103:795.0 104:1895.0 105:1600.0 106:93.0 107:1006.0 111:54.0 114:119.0 115:343.0 116:1093.0 117:1882.0 118:74.0 119:764.0 120:257.0 121:91.0 123:433.0 124:64.0 130:954.0 131:775.0 132:138.0 133:1716.0 134:591.0 135:1393.0 137:357.0 138:54.0 143:236.0 145:330.0 146:1109.0 147:1330.0…				0.01	0.13	3461	1718	1177	1883	1650	489	1882	1043	2325	1925	1488	779	4919	1892	1364	441	690	2568	4201	1276	1159	4357	744	487	1487	2980	5081	1719	3155	2170	1350	1410	2792	2146	944	1148	525	152	2194	2269
425882	643214	174	425882	85:675.0 86:8753.0 87:732.0 88:751.0 94:195.0 96:4457.0 97:587.0 98:439.0 99:644.0 100:5325.0 101:786.0 102:837.0 103:547.0 106:167.0 110:172.0 112:880.0 113:405.0 114:640.0 115:342.0 116:518.0 117:622.0 118:113.0 119:160.0 121:127.0 123:128.0 126:863.0 128:3272.0 129:802.0 130:1971.0 131:890.0 132:355.0 133:614.0 138:152.0 140:329.0 141:216.0 142:640.0 143:173.0 144:349.0 146:822.0 147:3069.0 14…				0.48	0	9390	21697	4659	9495	7055	49137	7570	4492	22288	24007	14742	31073	9004	7742	26664	6319	64218	72535	119364	6313	26608	24328	10330	31177	14608	16195	2862	12906	15033	6056	1375	2543	5696	13706	7524	33978	1711	6689	4304	19720
425768	448574	185	425768	85:1042.0 86:4936.0 87:958.0 88:731.0 89:214.0 91:167.0 93:478.0 95:268.0 97:120.0 99:1599.0 109:102.0 111:6444.0 112:688.0 113:949.0 115:886.0 127:109.0 128:372.0 129:3384.0 130:6833.0 131:2989.0 132:830.0 133:437.0 134:143.0 141:319.0 143:3130.0 144:1696.0 145:151.0 146:9069.0 156:234.0 157:621.0 158:72.0 159:1990.0 160:2266.0 161:341.0 162:157.0 167:27.0 171:27.0 183:38.0 184:42.0 185:5596.0 1…				0.59	0.1	1517	1151	1378	1069	494	676	847	1032	782	497	642	1304	1414	801	1163	769	335	1085	1029	918	780	697	533	1182	981	951	1968	1164	578	520	861	654	1205	450	753	1300	770	586	330	364
425117	736157	204	425117	87:923.0 88:1128.0 89:2585.0 90:217.0 97:1666.0 99:1732.0 100:4460.0 101:3512.0 102:518.0 103:10288.0 104:559.0 105:630.0 106:148.0 110:140.0 114:766.0 115:1302.0 117:17786.0 118:2572.0 120:236.0 124:92.0 127:460.0 129:11985.0 130:3625.0 131:13919.0 132:3253.0 133:6716.0 134:480.0 135:796.0 137:174.0 139:266.0 143:2204.0 144:622.0 147:25173.0 148:4766.0 149:3813.0 150:612.0 151:67.0 152:235.0 154…				0.16	0.15	1205	898	862	742	632	1005	997	411	1617	411	426	962	722	948	870	1131	331	584	1044	306	677	1386	1223	1215	819	446	466	1146	878	808	506	707	1385	1072	113	1468	2059	1852	1151	496
424428	466314	140	424428	86:104.0 87:122.0 88:77.0 90:135.0 92:86.0 97:144.0 109:24.0 110:137.0 120:21.0 130:86.0 131:295.0 134:63.0 136:29.0 140:3970.0 141:169.0 146:92.0 148:46.0 151:70.0 152:186.0 160:331.0 161:45.0 162:46.0 166:31.0 184:141.0 196:30.0 202:32.0 203:12.0 207:51.0 212:36.0 223:13.0 228:59.0 230:28.0 231:36.0 232:18.0 234:47.0 236:15.0 237:9.0 238:26.0 240:35.0 242:30.0 244:25.0 245:27.0 246:11.0 248:35.…				0	0.75	529	269	452	288	117	82	274	325	268	79	74	393	147	214	312	73	43	278	292	295	94	177	146	93	237	353	466	341	1759	310	62	252	196	587	150	458	202	1493	373	182
423467	809377	411	423467	85:295.0 86:1352.0 87:262.0 89:346.0 91:353.0 94:833.0 95:890.0 96:409.0 97:1047.0 99:559.0 100:2196.0 101:671.0 102:616.0 105:672.0 106:257.0 107:272.0 108:525.0 109:539.0 110:467.0 111:308.0 112:291.0 113:251.0 114:331.0 116:521.0 117:1107.0 118:127.0 119:262.0 120:145.0 122:667.0 124:230.0 126:528.0 127:497.0 128:699.0 129:1264.0 130:344.0 131:527.0 132:299.0 133:569.0 134:174.0 135:512.0 136:…				0	0.35	119	66	45	98	19	108	77	35	33	46	52	90	81	43	43	100	22	81	61	32	70	34	27	54	116	58	63	54	123	41	42	30	42	63	24	43	48	11	67	52
422827	1249582	311	422827	86:79.0 89:346.0 90:42.0 91:1401.0 92:251.0 93:1414.0 94:908.0 95:8446.0 97:3164.0 98:1861.0 100:765.0 102:105.0 103:4801.0 105:235.0 106:98.0 107:91.0 109:2643.0 112:457.0 123:1090.0 125:175.0 127:2316.0 129:39052.0 130:1251.0 133:207.0 140:120.0 142:914.0 143:737.0 149:112.0 151:202.0 155:2924.0 156:636.0 157:84.0 158:239.0 159:115.0 164:82.0 165:146.0 169:268.0 170:465.0 171:297.0 173:46.0 174…				0	0.2	175	159	127	131	63	199	131	97	102	125	100	214	166	111	104	130	66	116	307	113	56	122	27	84	104	118	203	176	115	136	79	80	232	164	47	169	101	42	168	156
422508	194469	160	422508	86:3805.0 114:590.0 116:16074.0 117:2228.0 118:714.0 121:143.0 125:163.0 126:1457.0 127:5215.0 130:1430.0 134:564.0 136:96.0 140:68.0 145:339.0 146:760.0 147:1390.0 151:78.0 152:1879.0 160:18158.0 161:2013.0 162:612.0 166:256.0 172:281.0 175:2705.0 176:167.0 186:64.0 191:160.0 193:290.0 197:56.0 200:118.0 204:39.0 206:75.0 208:334.0 230:37.0 234:31.0 267:97.0 271:21.0 276:22.0 279:37.0 282:73.0 3…				0.18	0.01	5096	3636	2597	3910	1799	3351	2622	8492	7863	1348	2229	2724	3557	3153	5176	3840	1288	4618	7772	4577	2054	7235	1810	1936	1869	3682	3388	2345	1369	5033	2575	2326	3955	5261	48	2774	2444	1099	7775	2515
422311	248255	100	422311	85:2124.0 86:4768.0 95:91.0 98:274.0 100:37865.0 101:1929.0 109:30.0 114:2233.0 129:4402.0 204:386.0 212:14.0 245:80.0 247:21.0 250:85.0 251:41.0 354:6.0 362:12.0 388:13.0				0.52	0.16	15268	25082	17627	15726	8808	24578	11872	22445	19748	19538	21145	18176	21918	13622	22340	9746	40668	18669	25683	30353	15247	21815	9965	26250	17755	15543	19473	15327	18239	45616	14244	10315	24108	19361	16546	37624	10918	11191	23480	17426
422281	200730	220	422281	86:99.0 87:238.0 88:155.0 91:43.0 92:65.0 94:33.0 97:19.0 101:51.0 102:121.0 103:1240.0 105:490.0 106:81.0 107:70.0 110:111.0 111:32.0 113:27.0 115:2176.0 116:218.0 119:828.0 120:108.0 121:55.0 125:128.0 130:74.0 131:465.0 132:61.0 133:9056.0 134:1240.0 135:797.0 137:50.0 147:7292.0 148:1023.0 149:2100.0 150:319.0 151:194.0 153:44.0 162:37.0 163:89.0 168:18.0 176:1016.0 177:173.0 178:39.0 188:13.…				0.71	0.54	8620	5571	3283	6205	2774	404	3975	4388	4366	1762	3963	2804	3599	4524	2876	2632	1673	6283	5458	6323	3790	4262	2582	2503	2716	6010	3930	516	1688	8407	3315	3899	7533	9470	464	7028	3245	1176	4698	3581
418155	424604	85	418155	85:44324.0 86:2234.0 87:399.0 89:334.0 90:162.0 91:145.0 96:857.0 97:4274.0 98:5872.0 99:11996.0 100:983.0 101:275.0 110:189.0 111:1353.0 112:3886.0 113:4742.0 117:264.0 125:374.0 126:1105.0 127:1955.0 140:1672.0 141:2263.0 142:299.0 154:205.0 155:1108.0 168:158.0 169:502.0 170:42.0 198:1245.0 243:43.0				0.03	0.2	2322	2922	2061	1935	3136	2170	1329	3746	2283	1760	1383	1861	2905	1580	2211	1748	1012	1999	1876	2827	1882	1647	887	2625	2181	2550	3504	5262	1934	2005	2004	2149	3049	2574	1155	2681	1069	1197	1705	2547
417655	617151	144	417655	86:3774.0 87:1549.0 88:991.0 89:2957.0 90:776.0 91:309.0 94:471.0 98:1359.0 99:3959.0 100:9233.0 101:4336.0 102:3341.0 103:2911.0 104:564.0 105:1234.0 106:230.0 108:133.0 109:194.0 111:2306.0 113:264.0 114:2182.0 115:5653.0 118:1930.0 119:1133.0 120:205.0 121:489.0 122:201.0 123:2387.0 128:3007.0 129:8060.0 130:2561.0 131:6034.0 133:11790.0 134:1967.0 135:1515.0 136:152.0 139:1000.0 141:1401.0 14…				0.59	0	3045	4780	1137	585	526	1518	779	598	741	4160	876	382	173	12333	1081	890	2603	511	2156	635	1274	1725	437	713	1379	527	4639	597	1908	749	986	663	3543	8543	3942	735	1448	6736	2928	1193
416620	829032	305	416620	85:1308.0 86:175.0 87:249.0 89:290.0 91:235.0 92:68.0 94:89.0 98:449.0 99:385.0 100:1508.0 101:2476.0 102:361.0 103:965.0 104:129.0 106:199.0 108:53.0 113:265.0 115:181.0 116:826.0 117:827.0 118:86.0 119:149.0 124:28.0 125:148.0 127:591.0 129:839.0 130:130.0 131:1047.0 132:227.0 133:1765.0 134:95.0 135:135.0 137:28.0 138:31.0 140:98.0 141:66.0 143:534.0 144:188.0 146:45.0 147:6037.0 148:868.0 149…				0.14	0	1142	992	1326	823	494	1252	1886	1073	422	689	605	587	602	340	1189	954	189	1137	1065	759	231	1132	847	1561	332	305	702	1365	883	1795	1255	1081	442	1156	331	953	271	57	853	1308
416618	884796	223	416618	85:643.0 86:98.0 90:56.0 91:322.0 93:274.0 94:78.0 95:252.0 96:100.0 97:290.0 103:481.0 104:253.0 105:561.0 107:117.0 109:233.0 110:49.0 111:146.0 115:224.0 119:312.0 120:97.0 121:208.0 122:99.0 123:171.0 124:37.0 128:164.0 129:224.0 130:154.0 131:4100.0 132:508.0 134:52.0 135:62.0 136:76.0 137:215.0 138:83.0 143:635.0 144:127.0 145:68.0 149:59.0 150:73.0 151:332.0 152:47.0 159:48.0 163:162.0 164…				0.49	0	2287	8965	5296	4864	2700	4227	5034	3022	1073	3430	2044	7484	2387	3230	4314	2131	3348	4238	3734	10058	3497	1799	2545	2999	1265	5171	563	2634	939	4939	6031	1848	1591	7270	2441	6681	111	183	1585	2132
416612	1155879	121	416612	85:2376.0 86:750.0 87:861.0 88:230.0 89:2080.0 90:364.0 91:14458.0 92:2163.0 93:14235.0 94:2405.0 95:9430.0 96:2241.0 97:1804.0 98:106.0 99:1201.0 101:3022.0 102:703.0 103:1520.0 104:445.0 105:12559.0 106:1728.0 107:11027.0 108:2692.0 109:7275.0 110:1434.0 111:1049.0 112:165.0 113:567.0 114:152.0 115:2115.0 116:3947.0 117:15475.0 118:2031.0 119:7369.0 120:1214.0 121:26542.0 122:3558.0 123:5389.0 …				0.27	0	3427	29298	3041	7777	2319	6788	2988	2962	1823	10562	1696	15500	1049	4197	3403	786	17790	12907	3504	2078	1796	2373	730	2522	3092	26198	7168	1572	2377	1019	2822	784	3343	18993	4054	15340	354	298	1047	1786
416595	295099	129	416595	85:1457.0 88:444.0 90:177.0 91:1003.0 92:245.0 93:802.0 94:470.0 98:789.0 99:297.0 101:1214.0 102:2163.0 104:145.0 105:3528.0 107:459.0 108:80.0 109:102.0 110:1652.0 111:143.0 115:274.0 116:1078.0 117:1018.0 118:214.0 119:206.0 120:277.0 122:66.0 124:118.0 125:181.0 129:31012.0 130:3705.0 131:2428.0 133:454.0 134:203.0 135:113.0 136:70.0 137:74.0 141:58.0 143:146.0 149:189.0 153:58.0 158:237.0 15…				0.34	0	7606	16637	1174	12906	4729	14599	9022	8754	9303	7737	7997	13558	5483	21557	10801	6674	13054	3963	8956	4302	7688	8636	6546	6141	8804	9587	13767	9094	11778	12845	13203	7463	5890	36730	7714	36650	2284	1730	11483	20752
416580	857892	246	416580	86:1190.0 89:1439.0 90:240.0 91:1529.0 92:240.0 94:1820.0 98:558.0 100:4185.0 102:1629.0 105:328.0 106:454.0 108:767.0 112:530.0 115:1268.0 118:297.0 119:122.0 120:295.0 123:160.0 124:217.0 127:338.0 128:2701.0 130:639.0 131:2931.0 133:430.0 134:736.0 137:18.0 138:127.0 140:327.0 141:433.0 143:2505.0 144:2911.0 145:1039.0 150:618.0 152:193.0 154:1840.0 155:842.0 156:7246.0 157:1661.0 158:958.0 15…				0.39	0	2701	1630	1404	2061	2194	2292	2448	1331	1972	1411	572	1589	2440	428	1933	1004	1350	2054	3104	1630	2147	2144	1086	2095	1638	1902	530	2189	2912	2206	1466	875	606	1539	731	1964	119	143	498	3350
416565	1136251	442	416565	85:2469.0 86:1146.0 87:724.0 88:568.0 89:3885.0 90:447.0 91:11305.0 92:1550.0 93:11070.0 94:3314.0 95:6391.0 96:1611.0 97:1338.0 98:458.0 99:2506.0 100:842.0 101:1661.0 102:221.0 103:1865.0 104:641.0 105:10514.0 106:2655.0 107:8207.0 108:2929.0 109:3777.0 110:1311.0 111:1036.0 112:607.0 113:773.0 114:214.0 115:2233.0 116:3677.0 117:11392.0 118:2066.0 119:6732.0 120:2447.0 121:4719.0 122:2127.0 12…				0.16	0	1259	3611	1972	1275	286	865	597	599	437	1420	337	1291	358	371	717	137	1701	1164	996	436	322	511	203	514	642	2222	1696	221	854	347	377	94	889	2085	57	2042	55	32	510	782
414364	206087	130	414364	85:11774.0 86:1406.0 87:10920.0 88:4233.0 89:5703.0 94:656.0 95:3773.0 97:996.0 98:697.0 99:5266.0 101:16458.0 102:2306.0 103:19231.0 104:1370.0 105:2978.0 111:132.0 113:1353.0 115:92636.0 116:10644.0 117:13166.0 118:1382.0 119:1806.0 120:431.0 121:89.0 125:290.0 130:66572.0 131:22882.0 132:4553.0 133:22497.0 134:2334.0 135:1510.0 147:245391.0 148:39325.0 149:20265.0 150:2037.0 162:84.0 163:1777.…				0.15	0.34	95034	98866	42641	74592	33628	88950	64947	64460	56629	33451	44781	58020	67639	65255	58085	49761	32787	84118	69406	72285	53770	51325	32337	47723	58120	102088	69695	63002	25075	96764	57337	46444	84879	116232	11181	96139	55241	26462	90121	57297
414152	1021228	311	414152	93:273.0 94:128.0 95:1354.0 96:409.0 97:187.0 103:282.0 107:103.0 109:636.0 110:108.0 111:127.0 113:115.0 116:72.0 123:147.0 127:262.0 129:6187.0 130:513.0 137:73.0 138:53.0 142:368.0 151:20.0 152:34.0 155:386.0 157:145.0 158:31.0 170:78.0 178:31.0 179:44.0 199:47.0 220:25.0 227:75.0 254:24.0 260:22.0 274:18.0 286:20.0 308:211.0 309:79.0 311:4269.0 312:1175.0 313:367.0 314:14.0 329:24.0 391:15.0 …				0	0.38	139	197	81	129	49	106	105	78	72	76	102	180	192	115	110	173	83	205	102	117	182	46	40	72	86	100	125	131	64	133	118	110	133	166	84	306	108	41	172	189
414134	457616	233	414134	96:65.0 107:88.0 110:1504.0 111:70.0 114:198.0 124:102.0 125:41.0 126:155.0 128:691.0 131:51.0 141:235.0 142:60.0 146:139.0 149:129.0 165:134.0 176:60.0 177:93.0 186:40.0 203:58.0 218:146.0 233:3095.0 234:349.0 272:18.0 273:29.0 283:35.0 295:38.0 302:381.0 303:57.0 345:25.0 368:14.0 407:11.0 433:57.0 435:15.0 437:21.0 438:17.0 439:9.0 457:36.0				0	0.66	447	391	636	448	256	424	454	464	434	1103	259	568	703	850	426	404	250	274	243	458	487	227	182	884	515	495	276	570	1050	387	412	211	559	448	931	414	508	579	473	401
414079	715799	324	414079	86:521.0 89:211.0 91:365.0 95:372.0 99:696.0 100:1332.0 101:204.0 102:228.0 103:479.0 104:122.0 105:220.0 107:83.0 108:87.0 109:337.0 110:246.0 113:254.0 114:175.0 115:569.0 118:446.0 119:312.0 120:89.0 123:564.0 124:131.0 125:64.0 126:368.0 128:467.0 130:475.0 131:360.0 132:1003.0 133:967.0 134:153.0 135:357.0 136:58.0 138:56.0 139:107.0 140:478.0 142:436.0 144:360.0 146:598.0 147:2677.0 148:389…				0	0.13	221	144	48	82	31	73	90	61	40	36	39	133	92	44	95	51	33	78	78	54	59	56	45	53	54	144	196	82	67	71	76	53	163	158	23	93	26	28	133	66
413981	507396	159	413981	88:1929.0 89:6548.0 90:437.0 93:434.0 95:520.0 96:150.0 97:6387.0 98:356.0 99:1364.0 101:2790.0 102:166.0 103:1814.0 104:312.0 107:827.0 108:120.0 109:263.0 111:1641.0 112:1788.0 113:310.0 116:969.0 117:8411.0 118:600.0 119:492.0 123:127.0 124:193.0 125:7045.0 126:1628.0 127:387.0 128:170.0 129:3092.0 131:1660.0 132:1479.0 133:844.0 138:21.0 142:530.0 143:6522.0 144:1088.0 145:1061.0 147:9862.0 1…				0.57	0.44	3165	1561	1021	3313	1457	2011	696	2509	1951	391	1933	3215	2883	1683	2391	500	1300	853	2625	2681	1976	2009	1185	2853	2574	2971	4817	627	1393	3622	2119	863	849	3274	733	3170	6821	1446	3869	2060
413972	670093	131	413972	86:91.0 89:300.0 90:66.0 91:428.0 93:161.0 99:227.0 102:215.0 106:94.0 107:159.0 109:151.0 111:218.0 112:150.0 115:528.0 119:160.0 124:50.0 126:119.0 127:241.0 128:126.0 131:14569.0 132:1741.0 133:773.0 134:130.0 136:90.0 141:178.0 142:75.0 145:64.0 148:80.0 153:72.0 155:77.0 158:99.0 159:130.0 160:49.0 162:47.0 163:113.0 165:112.0 181:85.0 182:9.0 183:50.0 187:51.0 191:106.0 201:59.0 203:45.0 21…				0.35	0.03	23878	11226	28151	13762	4141	6992	11862	14854	7028	7905	5751	8098	6549	18905	7659	5944	2631	6152	9310	10058	4849	8241	3075	7409	6027	20210	8252	8343	9699	7740	8262	6042	8711	9939	6296	8715	19457	3542	10314	5162
413961	282423	132	413961	86:3197.0 88:738.0 90:213.0 100:6022.0 101:1544.0 102:1976.0 108:32.0 113:1559.0 114:1496.0 115:1433.0 116:5156.0 117:1040.0 118:8214.0 119:1304.0 120:612.0 122:26.0 128:112.0 130:16810.0 131:3797.0 132:23659.0 133:3086.0 134:1776.0 141:69.0 144:347.0 145:15085.0 146:5764.0 147:1390.0 148:104.0 149:211.0 150:18.0 155:79.0 158:58.0 159:669.0 160:3155.0 161:667.0 162:268.0 170:255.0 174:152.0 175:3…				0.41	0.28	31698	28228	16971	20633	11353	12093	16818	20671	19680	9985	20769	21202	15273	21378	16321	19724	3890	23551	22454	19121	4088	18094	11451	16411	18279	21716	34526	22949	9397	34636	8819	14501	22478	35164	7704	17998	17325	8706	28207	12459
413838	455989	230	413838	85:1436.0 86:1943.0 87:587.0 89:1556.0 90:46.0 93:343.0 95:113.0 98:308.0 99:266.0 100:2512.0 101:847.0 102:1123.0 103:2491.0 104:417.0 105:550.0 106:105.0 109:61.0 110:454.0 113:392.0 114:732.0 115:343.0 116:972.0 117:3035.0 118:513.0 119:549.0 124:83.0 126:395.0 129:260.0 130:807.0 131:1755.0 133:2308.0 140:298.0 141:206.0 142:901.0 143:346.0 144:175.0 145:26.0 146:565.0 147:10299.0 150:221.0 1…				0	0.13	65	904	601	703	217	903	327	483	454	247	160	675	220	55	98	198	90	588	729	678	136	52	31	618	171	730	475	675	350	45	262	437	49	1121	389	691	303	39	859	574
408463	196351	104	408463	85:1945.0 86:3277.0 87:2676.0 88:4755.0 89:129541.0 90:10731.0 91:5908.0 92:302.0 96:2027.0 100:5637.0 101:876.0 102:2772.0 103:4228.0 104:92362.0 105:9468.0 106:3745.0 107:283.0 114:52.0 115:2335.0 116:1342.0 117:14253.0 118:2722.0 119:45889.0 120:4558.0 121:1849.0 124:163.0 129:656.0 130:84.0 131:2893.0 132:623.0 133:9740.0 134:1445.0 135:893.0 140:106.0 143:186.0 144:76.0 145:678.0 146:242.0 1…				0.23	0.19	191278	169005	103133	91662	39066	138242	131322	94794	61496	21229	38257	73300	83712	53140	61683	77765	51586	148933	61508	78196	93465	43247	37767	49267	81757	63078	146118	93267	39794	100722	130366	84428	147671	179759	138	175961	33113	25537	169347	84374
407525	215736	93	407525	87:2313.0 89:1032.0 90:289.0 93:54081.0 94:6623.0 95:22703.0 96:3219.0 97:1105.0 98:575.0 100:155.0 113:2209.0 117:6143.0 119:1076.0 127:347.0 128:605.0 130:1918.0 132:888.0 134:1483.0 137:743.0 138:194.0 139:390.0 149:298.0 157:122.0 168:102.0 187:1695.0 189:1892.0 190:718.0 191:2008.0 202:1367.0 203:235.0 204:1025.0 205:188.0 206:114.0 219:207.0 432:26.0				0	0.15	1681	1110	277	1178	558	1273	1198	688	839	559	425	528	692	660	527	362	442	940	1151	1483	792	583	338	624	724	1447	878	682	334	1181	568	717	1154	2022	233	1067	1725	3576	3329	818
404192	513758	203	404192	86:1087.0 87:701.0 89:10942.0 90:1375.0 91:897.0 92:234.0 93:224.0 95:81.0 97:276.0 99:1236.0 100:1787.0 101:579.0 102:733.0 103:952.0 105:371.0 109:48.0 113:8239.0 114:1810.0 115:813.0 116:1852.0 117:636.0 119:293.0 120:211.0 122:175.0 123:150.0 127:284.0 128:817.0 129:758.0 130:896.0 131:1644.0 132:506.0 133:543.0 138:44.0 140:608.0 144:1053.0 145:410.0 146:1135.0 150:110.0 153:285.0 156:3437.0…				0	0.18	416	181	128	117	62	112	252	153	193	303	190	204	277	164	271	111	214	142	63	259	241	90	93	166	382	108	385	200	111	195	180	128	1096	156	117	238	136	323	200	208
403856	969133	319	403856	85:1806.0 86:1370.0 87:2290.0 88:1849.0 89:24302.0 94:575.0 96:552.0 97:1171.0 98:849.0 99:5915.0 100:2635.0 101:14014.0 102:234.0 103:123486.0 104:10448.0 105:4268.0 109:1712.0 110:687.0 111:662.0 112:651.0 113:3383.0 116:4239.0 117:43452.0 118:2298.0 126:2198.0 127:6152.0 128:1463.0 129:61022.0 130:5531.0 131:7314.0 133:19116.0 134:2018.0 135:3709.0 137:160.0 138:231.0 139:685.0 140:1286.0 141:…				0.25	0	508	236	135	124	428	91	164	224	115	116	3	156	338	493	103	370	91	71	156	143	98	90	82	395	128	75	172	258	1217	486	4069	227	723	68	22	104	26670	139	361	135
402267	619158	116	402267	85:2150.0 86:4573.0 89:391.0 91:474.0 95:835.0 98:530.0 99:1443.0 100:5251.0 101:828.0 102:2075.0 104:547.0 109:143.0 110:255.0 112:547.0 113:292.0 114:1565.0 115:1078.0 116:59736.0 117:7591.0 118:5293.0 119:700.0 123:647.0 124:164.0 125:467.0 126:717.0 127:559.0 128:1686.0 130:1734.0 131:1922.0 132:1195.0 133:2935.0 134:304.0 138:129.0 139:237.0 140:175.0 141:176.0 142:17101.0 143:3128.0 147:801…				0.18	0	5652	15739	4532	4902	3503	9485	7903	10002	36195	28798	22101	35115	3839	60550	23989	10102	18689	12453	16306	1770	22401	4192	11026	31786	9654	14939	66215	15276	28714	10770	4645	2216	8442	41285	8153	10198	5063	6623	6915	19296
402247	663443	204	402247	89:5781.0 90:603.0 94:465.0 97:3196.0 98:3217.0 99:949.0 100:27131.0 101:9472.0 102:3023.0 103:1281.0 104:350.0 105:283.0 109:1139.0 112:1822.0 113:750.0 114:5936.0 115:7190.0 116:27589.0 117:9697.0 118:1981.0 119:1392.0 123:230.0 125:344.0 126:1715.0 127:291.0 129:15906.0 131:5493.0 132:9657.0 133:5243.0 134:316.0 137:947.0 142:1526.0 143:1784.0 145:1559.0 146:1657.0 147:11916.0 151:281.0 153:13…				0.06	0.15	7182	8238	2997	4529	2313	4413	2493	1496	4204	1996	4024	2041	2371	14183	3410	1559	1882	1566	6590	1193	1427	3035	1182	1306	3093	3579	4384	2608	5058	2241	2199	1691	4499	2994	3926	4428	10232	4966	3316	2124
402246	564399	91	402246	85:197278.0 86:9068.0 87:338.0 88:453.0 89:3089.0 90:5099.0 91:1029489.0 92:42733.0 93:339538.0 94:13802.0 95:10140.0 96:14903.0 97:128737.0 98:37494.0 99:24525.0 100:1314.0 103:3565.0 104:27985.0 105:243873.0 106:21554.0 107:78897.0 108:3046.0 109:2905.0 110:4754.0 111:37374.0 112:18075.0 113:7409.0 114:485.0 116:453.0 117:7578.0 118:8299.0 119:54949.0 120:5868.0 121:17758.0 122:753.0 123:1320.0…				0.49	0.24	3715	6417	5188	3117	1648	2917	2842	4846	2166	1863	3024	5008	4779	4027	4589	6420	1415	4354	1780	6317	4010	7470	3060	2795	3507	6996	7747	3685	1998	4880	5331	2539	6264	6888	1373	3610	2375	2600	204	5457
400786	613238	314	400786	86:1428.0 89:712.0 94:571.0 95:772.0 96:2365.0 97:1829.0 98:256.0 99:1022.0 100:6444.0 102:975.0 103:406.0 108:480.0 109:362.0 112:175.0 116:1457.0 117:2916.0 122:853.0 126:746.0 127:581.0 129:2607.0 131:817.0 132:661.0 133:1500.0 141:410.0 142:578.0 145:308.0 147:5651.0 148:499.0 149:1871.0 150:961.0 151:356.0 152:176.0 153:1402.0 154:1667.0 155:951.0 168:1485.0 169:2437.0 170:929.0 171:657.0 18…				0.18	0	733	681	581	805	486	698	669	569	547	495	372	669	618	359	518	454	717	666	456	760	604	542	293	728	770	562	286	783	774	679	533	441	714	796	283	915	57	30	668	878
396036	497470	202	396036	85:1417.0 86:1866.0 88:160.0 89:782.0 90:311.0 92:32.0 94:72.0 95:268.0 99:1118.0 100:7911.0 101:1440.0 102:8090.0 103:2850.0 112:1311.0 114:365.0 115:1821.0 116:1728.0 117:2760.0 118:284.0 119:229.0 121:143.0 122:100.0 126:236.0 127:151.0 128:549.0 129:1692.0 130:1263.0 132:928.0 133:4109.0 134:502.0 135:380.0 136:77.0 139:217.0 142:1625.0 144:2330.0 146:452.0 150:302.0 152:33.0 158:27630.0 159:…				0.13	0	364	117	205	452	772	111	97	398	770	103	464	274	183	1709	212	81	67	111	368	283	120	760	248	218	93	145	94	136	129	617	137	405	762	278	228	172	818	119	282	145
395930	682556	156	395930	86:320.0 88:108.0 98:164.0 99:191.0 100:239.0 101:1014.0 102:672.0 112:113.0 113:118.0 114:147.0 115:471.0 126:176.0 127:465.0 128:2892.0 129:1518.0 130:294.0 140:236.0 141:109.0 142:208.0 152:100.0 154:922.0 155:766.0 156:12170.0 157:1217.0 160:504.0 174:494.0 175:144.0 181:59.0 182:240.0 183:270.0 184:2785.0 185:411.0 196:15.0 197:69.0 214:25.0 224:32.0 237:54.0 255:68.0 258:344.0 259:71.0 263:…				0.03	0.8	670	1128	1205	1624	402	1033	598	519	576	593	1297	2504	284	4290	481	656	500	295	407	1141	719	179	591	934	680	538	344	714	643	734	360	236	2576	334	1115	1099	4262	344	1294	977
395902	961158	325	395902	85:379.0 86:327.0 87:220.0 88:61.0 89:441.0 90:59.0 92:60.0 93:128.0 94:72.0 99:536.0 100:1792.0 101:717.0 102:439.0 103:3117.0 104:275.0 105:208.0 106:71.0 110:336.0 111:289.0 112:120.0 113:236.0 114:197.0 115:443.0 116:367.0 117:561.0 118:126.0 119:109.0 122:43.0 123:137.0 124:211.0 125:142.0 126:326.0 127:333.0 128:103.0 129:1126.0 130:268.0 131:609.0 132:254.0 133:1640.0 134:303.0 135:152.0 1…				0	1	425	162	163	193	55	335	693	113	116	112	81	231	189	227	204	113	72	188	148	266	141	176	83	329	237	169	264	108	169	262	190	89	283	121	73	201	335	48	120	161
391892	652623	179	391892	85:5153.0 86:6223.0 87:8147.0 88:4686.0 89:55910.0 90:5834.0 91:5550.0 92:772.0 94:519.0 96:1450.0 98:1170.0 99:4998.0 100:9622.0 101:19478.0 102:6946.0 103:70761.0 105:13539.0 106:778.0 109:257.0 111:2550.0 112:1556.0 113:3096.0 114:5788.0 115:6848.0 116:5962.0 117:54984.0 119:7079.0 120:743.0 123:182.0 126:1713.0 127:2758.0 128:2019.0 131:17403.0 132:2428.0 133:43487.0 134:4962.0 135:4182.0 136…				0.03	0.3	74357	54898	113192	57082	36514	19864	31486	14035	52076	16529	57071	23608	8108	88374	15811	28318	13977	11914	56889	27980	13458	50117	12979	10534	32591	21167	18842	9183	28029	20570	6224	44374	142137	55964	15490	37116	64919	61877	154799	22418
391891	295210	99	391891	90:55.0 91:1092.0 92:161.0 94:380.0 96:1160.0 98:2181.0 99:33244.0 100:3558.0 101:307.0 102:335.0 103:23811.0 104:2373.0 105:1588.0 106:360.0 108:39.0 109:483.0 110:1974.0 111:121.0 115:1388.0 116:631.0 117:473.0 119:928.0 120:197.0 121:947.0 123:563.0 124:333.0 126:499.0 129:231.0 130:291.0 133:4187.0 134:654.0 135:1851.0 136:16.0 137:1243.0 138:81.0 139:272.0 140:126.0 141:77.0 142:223.0 143:44…				0.01	0.36	69668	39151	51599	43290	17225	34331	47542	39543	3144	19517	2962	52730	42896	32322	36782	14586	28937	47662	4165	29247	24026	3429	1859	23272	33024	38422	54181	27568	16700	49273	26970	25974	42992	76742	20807	41230	36112	17681	61551	33748
391853	245700	154	391853	85:4204.0 87:4814.0 88:12359.0 89:2553.0 90:999.0 91:3512.0 96:1473.0 97:1248.0 105:8851.0 106:1402.0 107:1222.0 108:320.0 109:349.0 110:10951.0 111:801.0 120:322.0 121:1539.0 122:478.0 123:779.0 124:149.0 125:432.0 126:258.0 127:3097.0 131:1481.0 134:2566.0 136:394.0 137:1457.0 138:714.0 139:382.0 140:125.0 141:310.0 148:4198.0 149:2387.0 150:293.0 151:3187.0 152:355.0 153:468.0 154:29873.0 155:…				0.22	0.2	18386	14374	16743	14098	3028	11234	14968	10559	6872	6047	5369	6788	10674	13423	13791	6646	3920	8054	9083	8399	5680	5427	2473	9841	6656	8061	8950	11152	12299	9339	14111	7466	10243	8584	7847	10815	5818	1802	13002	8247
391851	277865	142	391851	85:16034.0 88:3988.0 89:725.0 92:29.0 96:92.0 98:1394.0 99:2722.0 100:16505.0 101:8993.0 102:1547.0 107:194.0 108:194.0 110:200.0 111:232.0 112:721.0 114:558.0 116:845.0 117:17882.0 118:2751.0 119:1764.0 120:140.0 121:267.0 124:142.0 126:949.0 127:59.0 129:1185.0 130:3871.0 131:3466.0 132:716.0 134:576.0 135:1189.0 140:583.0 142:23149.0 144:997.0 145:1388.0 146:245.0 148:4486.0 149:2660.0 150:127…				0.32	0.01	15254	13574	15069	23728	16801	12464	16635	27720	15199	10657	12967	16500	20617	12499	19505	14741	12134	14734	17009	16086	10384	12964	10225	18158	11376	17848	16799	20350	11608	23552	15090	11219	24186	27360	11507	20253	10319	34808	21672	13628
391842	474172	98	391842	85:408.0 86:419.0 87:130.0 88:128.0 96:108.0 97:293.0 98:16194.0 99:1633.0 101:769.0 102:1577.0 103:2061.0 104:170.0 105:94.0 111:6938.0 112:443.0 113:107.0 114:22.0 117:1527.0 118:80.0 119:65.0 124:31.0 125:85.0 126:102.0 127:79.0 128:180.0 129:1573.0 130:611.0 131:293.0 132:129.0 133:470.0 134:61.0 141:2402.0 142:484.0 143:358.0 144:245.0 147:2792.0 148:440.0 149:650.0 150:54.0 154:40.0 156:204…				0.24	0.16	3748	4860	3709	3774	2518	4946	2384	4278	3609	918	2700	3919	3562	4119	3537	1492	2745	4349	5968	1256	3105	3756	1729	4413	4033	232	3840	2040	2686	3415	2216	1956	5776	4895	1794	4530	5114	2003	2206	3850
391329	300803	98	391329	87:410.0 88:891.0 94:480.0 95:137.0 96:2922.0 97:2654.0 98:122651.0 99:4099.0 100:2089.0 101:895.0 105:154.0 107:736.0 112:554.0 113:614.0 114:3588.0 115:1351.0 116:1756.0 117:1720.0 125:189.0 128:876.0 129:1412.0 131:4099.0 132:1597.0 133:2012.0 134:1080.0 138:88.0 143:539.0 144:1147.0 147:54195.0 148:10264.0 149:6016.0 150:1702.0 153:651.0 154:144.0 156:171.0 166:502.0 167:16515.0 171:189.0 172…				0.03	0.21	1962	1221	1514	1113	541	897	1033	681	2292	891	1908	1527	1367	1169	1050	1167	600	1057	3160	1368	957	1838	506	1124	1099	1256	2054	1645	1088	1470	1500	910	1885	1696	1278	1448	898	572	2467	1004
390549	787710	103	390549	85:24650.0 86:7750.0 87:5991.0 88:3859.0 89:42650.0 90:3017.0 91:3466.0 92:1168.0 93:5065.0 94:2638.0 96:3541.0 98:3160.0 99:6629.0 100:9362.0 101:12748.0 102:5306.0 103:174386.0 104:13428.0 105:9235.0 106:1358.0 107:552.0 108:1918.0 109:1560.0 110:3546.0 111:10044.0 112:3374.0 113:5452.0 114:5583.0 115:5416.0 116:5750.0 120:545.0 121:1417.0 122:1126.0 123:4436.0 124:1716.0 125:1603.0 126:3428.0 …				0.01	0.45	13445	6945	6240	8666	19010	5248	17689	9664	6124	18536	7351	7481	9012	20402	4670	11374	3247	10263	6858	7087	8975	6282	3099	11904	5810	40973	9518	11255	8610	14578	13118	17688	6187	13145	6209	6759	11957	2754	14272	6440
390396	609976	189	390396	85:1087.0 86:1499.0 87:1012.0 88:891.0 89:6145.0 90:207.0 91:468.0 94:100.0 95:332.0 97:604.0 99:1321.0 100:145.0 101:2805.0 102:697.0 103:10645.0 104:753.0 105:1433.0 106:303.0 107:166.0 109:317.0 111:933.0 112:586.0 113:92.0 114:335.0 115:1567.0 117:760.0 119:847.0 120:168.0 121:56.0 123:95.0 124:348.0 127:141.0 129:11120.0 130:2291.0 131:2777.0 133:10265.0 134:1820.0 135:2226.0 136:184.0 140:4…				0.01	0.11	1063	1014	405	866	202	860	834	413	591	548	614	274	683	543	523	656	881	776	551	1442	403	538	375	438	591	672	671	668	549	786	780	284	1202	411	419	830	2015	558	423	905
390198	459090	155	390198	85:327.0 86:922.0 87:525.0 89:229.0 90:81.0 93:232.0 94:105.0 95:206.0 97:269.0 98:716.0 99:549.0 100:2474.0 101:419.0 102:299.0 103:1732.0 105:355.0 106:197.0 108:147.0 110:339.0 111:559.0 112:936.0 113:515.0 114:454.0 115:522.0 116:279.0 117:539.0 118:206.0 119:304.0 123:77.0 128:232.0 129:176.0 130:657.0 131:1174.0 132:380.0 133:1495.0 134:145.0 136:109.0 137:82.0 138:78.0 139:4704.0 140:579.0…				0.08	0.89	364	368	839	279	153	215	417	226	255	1235	155	1988	690	1102	1174	199	1132	201	190	191	160	183	152	517	489	303	2353	238	818	210	546	201	93	102	461	253	468	156	256	194
390194	514902	142	390194	86:74.0 96:158.0 98:130.0 99:376.0 100:289.0 106:106.0 114:46.0 115:115.0 117:432.0 124:41.0 131:182.0 133:230.0 137:42.0 142:9942.0 143:1423.0 144:418.0 145:74.0 147:2771.0 148:467.0 149:83.0 170:211.0 171:91.0 186:6454.0 187:985.0 188:239.0 198:26.0 214:39.0 216:1837.0 218:61.0 235:19.0 244:72.0 245:28.0 257:36.0 288:624.0 289:129.0 290:49.0 297:22.0 303:12.0 337:16.0 391:21.0 440:17.0 442:22.0…				0.2	0.63	1627	2353	927	2300	5676	1630	985	3056	3963	1354	3239	1166	714	7032	1395	649	514	1963	6034	79	1034	5729	125	1842	1568	819	1520	1000	2040	2149	666	957	1876	3118	1583	1778	6003	1025	833	1118
390188	333711	249	390188	85:1779.0 87:2851.0 88:985.0 89:1073.0 95:382.0 96:1824.0 101:2586.0 102:1745.0 103:3734.0 104:524.0 105:1464.0 106:145.0 108:233.0 109:301.0 113:715.0 114:6500.0 115:32374.0 116:3951.0 117:7161.0 118:1107.0 119:2129.0 120:52.0 124:324.0 125:90.0 129:154.0 131:6274.0 132:988.0 133:14079.0 134:2250.0 135:1297.0 137:96.0 138:163.0 141:127.0 142:67.0 144:149.0 145:925.0 147:25847.0 148:3594.0 149:44…				0.19	0.68	589	533	767	469	166	732	430	421	499	543	434	918	913	326	744	480	238	440	1036	676	668	349	365	889	479	770	837	887	872	801	490	317	471	724	346	347	259	216	904	637
390179	802240	246	390179	89:129.0 101:160.0 114:145.0 117:173.0 128:182.0 129:183.0 182:48.0 205:95.0 207:211.0 226:29.0 230:46.0 239:31.0 246:4231.0 247:1056.0 248:393.0 256:32.0 258:22.0 303:43.0 342:231.0 343:78.0 376:29.0				0.01	0.31	1382	145	748	910	265	198	485	879	322	117	225	491	442	129	158	936	73	122	94	189	117	83	102	379	126	111	301	687	233	165	776	1265	2285	121	70	434	1284	48	3586	69
390156	240055	105	390156	85:522.0 86:1358.0 87:8168.0 88:1036.0 89:437.0 90:49.0 91:3238.0 92:542.0 93:155.0 99:310.0 102:3823.0 103:9102.0 104:1312.0 105:43161.0 106:2898.0 109:156.0 110:157.0 112:815.0 113:2688.0 120:11368.0 121:971.0 122:134.0 123:94.0 126:773.0 128:6633.0 129:1807.0 130:11892.0 131:3069.0 132:632.0 137:85.0 138:178.0 139:150.0 140:200.0 144:417.0 146:13096.0 152:85.0 153:146.0 154:252.0 155:110.0 156…				0.16	0.19	22633	16039	10101	17237	8932	7367	6830	13239	2141	8388	9128	10330	7590	11401	3542	6608	7803	17444	12038	26416	9875	10108	6538	7041	7023	12241	14043	6878	3692	15253	7110	6959	3039	21905	7390	5710	1938	1609	17022	9306
390140	652561	273	390140	85:2030.0 86:3702.0 87:3093.0 88:1974.0 89:24416.0 90:2306.0 91:1859.0 92:287.0 94:52.0 95:648.0 96:807.0 97:863.0 98:1345.0 99:1718.0 100:5802.0 101:12721.0 102:2278.0 103:24750.0 104:2608.0 105:7229.0 106:1111.0 107:93.0 110:293.0 111:1278.0 112:1618.0 113:1988.0 114:5274.0 115:3854.0 116:4894.0 117:42514.0 118:3762.0 119:4906.0 120:292.0 121:222.0 122:48.0 124:479.0 125:177.0 126:1784.0 127:32…				0.1	0.56	1195	475	362	376	168	401	468	252	1893	258	414	618	399	566	681	797	140	184	262	486	320	251	345	865	377	463	293	1340	377	584	449	947	1320	587	44	577	9742	220	699	161
390137	721291	174	390137	86:3517.0 87:252.0 88:202.0 96:209.0 100:3174.0 101:474.0 102:670.0 112:297.0 113:79.0 114:210.0 115:1368.0 116:385.0 118:183.0 126:143.0 128:1245.0 129:224.0 130:397.0 131:569.0 132:280.0 133:513.0 140:164.0 142:105.0 144:83.0 146:68.0 147:2821.0 148:472.0 149:313.0 154:404.0 155:135.0 156:503.0 157:133.0 158:80.0 160:75.0 172:266.0 174:17321.0 175:3286.0 176:1406.0 177:94.0 186:91.0 187:38.0 19…				0.73	0.3	163285	15062	180432	78759	12199	19422	9533	17276	37637	69047	21698	16257	22048	23242	20157	12962	5669	14211	23672	34779	15369	21639	9555	22909	82298	3332	80036	12190	32843	12342	29342	6839	196353	2695	51600	4849	3005	4573	253013	13373
390135	628121	214	390135	87:188.0 89:2734.0 91:6304.0 92:815.0 93:6789.0 94:3810.0 97:93.0 99:143.0 100:645.0 101:395.0 103:8639.0 104:713.0 105:871.0 106:57.0 107:1544.0 112:221.0 113:217.0 114:109.0 115:411.0 116:208.0 117:3285.0 118:420.0 119:810.0 120:9008.0 121:7743.0 122:645.0 126:72.0 128:142.0 129:2689.0 130:1094.0 131:730.0 132:117.0 133:1634.0 134:206.0 135:281.0 137:88.0 142:30.0 143:279.0 144:66.0 145:91.0 14…				0.25	0.11	27838	14949	13217	16318	4798	2591	2523	9810	1725	12493	1769	5945	567	5457	2381	6781	13186	12597	1306	13286	19104	869	4727	23850	8377	1737	18644	1906	11265	222	4430	207	15707	20475	1305	5011	11230	7759	2141	18914
390121	185157	140	390121	90:10777.0 91:478.0 92:77.0 96:77.0 97:7134.0 98:42.0 105:1060.0 107:101.0 108:389.0 110:6229.0 112:5610.0 118:186.0 128:823.0 139:141.0 140:68711.0 141:3345.0 143:118.0 153:40.0 172:122.0 187:12577.0 188:765.0 189:443.0 217:46.0 238:257.0 239:135.0 248:58.0 249:48.0 253:17.0 283:30.0 284:89.0 353:43.0 402:50.0 417:10.0 418:14.0 419:8.0 436:18.0 457:12.0 477:21.0 500:35.0				0.67	0.65	34002	18566	33252	166348	45374	360	422910	60858	177311	177	105143	111773	15200	67213	347101	10654	38158	30939	652912	40787	249	71777	111897	138	4264	287678	35107	24295	32	613467	453622	56017	753216	1139891	182898	162763	47073	95075	67030	232
389988	827217	204	389988	86:199.0 88:120.0 89:217.0 100:56.0 103:715.0 104:185.0 105:148.0 107:103.0 114:89.0 115:202.0 116:212.0 117:693.0 118:93.0 119:119.0 120:56.0 122:43.0 128:182.0 129:241.0 130:147.0 131:262.0 133:831.0 134:120.0 144:70.0 147:3003.0 148:246.0 149:405.0 152:46.0 155:79.0 159:232.0 163:139.0 169:35.0 174:109.0 180:48.0 181:22.0 188:58.0 189:56.0 191:394.0 193:169.0 199:49.0 202:54.0 203:82.0 204:721…				0.04	0.54	2585	1803	3879	1087	2021	1106	2706	906	3621	505	2610	1469	1789	1091	967	1243	1493	947	761	851	1533	777	1300	1496	795	1125	769	1545	2029	2540	2268	2071	456	1087	574	2121	2839	297	1076	872
384997	326938	159	384997	85:2976.0 88:2608.0 89:2196.0 91:4311.0 92:255.0 93:117.0 94:183.0 95:440.0 96:91.0 97:1684.0 99:3619.0 100:1213.0 101:3062.0 102:2633.0 103:61442.0 104:6065.0 105:4349.0 106:537.0 107:227.0 110:1084.0 111:264.0 113:583.0 114:325.0 115:5407.0 116:512.0 117:28139.0 118:2851.0 119:3206.0 120:339.0 122:97.0 125:110.0 127:2447.0 129:1827.0 130:2447.0 131:8028.0 132:2312.0 133:24233.0 134:3913.0 135:1…				0.37	0.01	4651	1570	9732	17510	20167	1976	11318	19013	2493	6346	45147	16374	4343	12494	15937	3072	2247	875	694	25608	20598	5198	25107	17725	7761	2506	6452	22647	9750	13726	390	13374	18293	17074	4134	5866	50176	16422	14123	1010
384969	1102973	255	384969	86:588.0 89:2697.0 90:359.0 91:12467.0 92:1453.0 93:2665.0 94:1870.0 95:6621.0 96:348.0 97:1545.0 103:1825.0 105:6362.0 106:1866.0 107:3292.0 108:993.0 109:6270.0 111:611.0 114:157.0 115:650.0 116:2075.0 117:9542.0 118:2076.0 119:2037.0 120:2500.0 121:6582.0 122:1706.0 123:1048.0 124:432.0 126:136.0 127:856.0 128:959.0 129:4589.0 130:2486.0 131:2545.0 132:921.0 133:9013.0 134:2692.0 135:4393.0 13…				0.52	0.03	14313	70900	16423	27403	14765	74030	6143	16891	16939	10745	26553	110595	13780	1871	20047	5793	9329	9812	11349	17961	13250	5268	5652	8739	10837	39896	29545	15218	9838	16856	73846	19594	23913	29525	10938	94077	212	2337	18808	17312
384944	684945	202	384944	90:539.0 92:140.0 94:117.0 100:295.0 101:883.0 102:845.0 103:1380.0 104:251.0 105:510.0 106:93.0 115:886.0 116:1027.0 117:803.0 118:268.0 120:145.0 121:129.0 128:490.0 129:778.0 131:1351.0 132:395.0 133:2507.0 134:477.0 135:212.0 139:68.0 140:96.0 142:388.0 143:487.0 144:717.0 145:734.0 146:223.0 147:16623.0 148:756.0 152:82.0 157:106.0 160:247.0 161:164.0 162:303.0 163:204.0 164:64.0 165:103.0 1…				0.01	0.19	28953	19688	17832	35292	9106	17861	28887	21162	25122	38918	22501	72462	24807	169583	21725	14264	17329	6917	32993	25628	14662	15430	14658	20564	22957	18629	231684	25869	29963	33787	23622	14367	36809	104120	27655	34932	4098	620	27109	21630
384941	867140	144	384941	85:1141.0 86:1385.0 88:330.0 89:458.0 94:121.0 95:72.0 97:860.0 98:118.0 99:620.0 100:976.0 101:1972.0 102:619.0 103:3728.0 104:202.0 105:171.0 108:241.0 110:147.0 111:341.0 114:106.0 116:1752.0 117:9203.0 118:638.0 120:374.0 121:539.0 122:49.0 123:173.0 125:157.0 127:101.0 128:277.0 129:3254.0 130:1868.0 131:3019.0 132:1336.0 133:5428.0 134:933.0 135:698.0 137:58.0 138:56.0 140:92.0 142:301.0 14…				0.39	0	3092	4044	2565	2851	1469	2398	1771	1304	2609	2202	4292	1137	1804	9078	3267	995	638	1362	5652	1233	799	3194	1012	1048	2896	2171	5057	1971	2492	2321	1462	1304	1457	383	3456	4604	2767	1313	3647	1863
384934	207460	142	384934	85:945.0 86:1285.0 87:2247.0 88:507.0 92:173.0 94:39.0 96:508.0 97:1366.0 98:1188.0 99:1128.0 100:876.0 102:1146.0 103:8197.0 104:937.0 108:288.0 112:141.0 114:3918.0 115:226.0 118:497.0 123:712.0 124:472.0 126:56.0 130:3452.0 131:1326.0 132:1269.0 138:99.0 142:10408.0 143:2003.0 144:681.0 145:70.0 146:3180.0 155:82.0 160:3361.0 161:342.0 162:179.0 169:59.0 182:80.0 198:95.0 238:14.0 244:45.0 257…				0.18	0.03	4686	3142	2281	4383	11164	1034	4148	8152	5505	1015	10609	1880	3521	3571	662	2219	1003	1174	2484	11242	5558	2017	3897	1365	3425	3471	2829	3560	946	14055	4948	13231	10378	4743	2078	1378	7097	2267	9521	1795
384919	847685	331	384919	85:3700.0 86:738.0 89:1579.0 90:287.0 91:2424.0 93:1183.0 94:1086.0 97:1099.0 101:2812.0 102:380.0 103:9580.0 104:831.0 105:531.0 106:282.0 107:1771.0 108:573.0 109:642.0 110:126.0 113:406.0 115:1547.0 117:4359.0 118:1021.0 119:136.0 121:624.0 123:619.0 124:140.0 125:497.0 129:16340.0 130:1908.0 131:2522.0 132:95.0 133:3646.0 134:333.0 135:1076.0 136:124.0 137:150.0 143:805.0 147:6284.0 149:2956.…				0.24	0	3673	38444	3147	6804	16016	28729	7342	4896	30740	1588	34441	3405	12548	15122	29910	10066	9792	16130	48118	11820	20874	41264	11334	8490	2026	38320	187580	6525	7860	4204	2548	3025	3077	47759	7936	4903	3415	19939	2515	12997
384912	842469	109	384912	85:3080.0 86:1771.0 87:376.0 88:387.0 89:495.0 90:180.0 91:1298.0 93:793.0 94:2605.0 95:5226.0 96:11085.0 97:6153.0 98:403.0 99:631.0 101:455.0 105:699.0 107:1513.0 108:4462.0 109:14571.0 110:5892.0 111:3007.0 112:354.0 116:3328.0 117:41879.0 118:3988.0 119:2962.0 121:3708.0 122:2033.0 123:2312.0 124:1231.0 125:548.0 126:72.0 127:316.0 129:17500.0 130:1827.0 131:1556.0 132:3808.0 133:1368.0 134:5…				0.34	0.08	2322	8571	1840	5045	4220	5304	2486	4371	4545	7140	271	5666	2237	11222	4642	798	9361	504	2423	3946	5457	2408	177	1291	7375	7314	7908	1103	1821	587	719	1096	508	2996	231	3423	809	2679	1667	4247
384906	552886	173	384906	85:8139.0 86:16229.0 87:4424.0 88:1568.0 90:1773.0 92:1399.0 94:684.0 95:281.0 96:1528.0 98:4294.0 101:19319.0 102:5905.0 103:117237.0 104:38325.0 105:48416.0 106:4220.0 107:1635.0 108:207.0 109:243.0 110:403.0 111:1549.0 112:2546.0 113:2768.0 114:27363.0 115:11159.0 116:6466.0 117:60986.0 118:8877.0 119:9612.0 120:699.0 121:175.0 123:208.0 124:607.0 125:317.0 126:3975.0 127:4250.0 128:8290.0 130…				0.24	0.16	25551	7420	20399	10681	10325	3666	15946	14993	5395	4365	3615	2481	5440	9806	8194	9884	3640	2810	9166	7149	3657	15822	4141	10956	9014	4698	2438	8710	27490	7005	4501	11539	103185	966	3225	3421	1984	2082	11291	3827
384897	568879	219	384897	85:2559.0 86:146.0 87:404.0 88:486.0 89:1804.0 98:112.0 99:630.0 100:668.0 101:639.0 103:4585.0 104:495.0 112:179.0 113:696.0 114:342.0 115:672.0 117:6661.0 118:567.0 119:413.0 127:46.0 129:10789.0 130:1168.0 131:5949.0 132:622.0 133:2479.0 134:237.0 141:290.0 142:105.0 145:109.0 147:3956.0 148:670.0 157:232.0 158:201.0 159:479.0 162:17.0 163:831.0 172:632.0 173:1026.0 174:550.0 175:144.0 186:98.…				0.22	0	1128	212	261	403	347	49	2997	388	313	182	391	308	758	550	1142	298	249	274	1304	2331	455	3479	329	2159	3135	423	1203	362	1039	1162	1479	492	2579	295	198	489	6142	790	986	166
384894	245864	154	384894	85:3909.0 86:2811.0 87:4097.0 89:3676.0 92:140.0 95:1075.0 96:3593.0 97:3242.0 99:691.0 104:5282.0 106:16427.0 107:19299.0 108:1489.0 109:313.0 110:2550.0 111:2017.0 120:1045.0 121:2835.0 122:292.0 123:228.0 124:1105.0 125:432.0 126:5030.0 127:7870.0 130:6633.0 131:11529.0 132:2104.0 136:188.0 137:252.0 139:172.0 140:148.0 143:3816.0 145:104.0 147:168042.0 148:25815.0 149:13028.0 150:8132.0 151:4…				0.11	0.1	18386	14374	17055	13680	3028	11234	14976	10559	6872	6047	5369	6999	11065	13805	13791	6850	1591	8054	9083	8411	545	5427	2595	10193	6656	8061	8950	11152	12299	9339	13707	8188	9939	8584	7847	10815	5805	1802	14689	8726
384885	542647	164	384885	85:1022.0 87:2277.0 89:22916.0 90:6381.0 91:3709.0 93:469.0 99:2428.0 100:7590.0 101:4675.0 102:2487.0 103:83968.0 104:26595.0 105:13861.0 106:1400.0 107:1591.0 109:629.0 110:670.0 111:1703.0 113:2713.0 115:1971.0 117:30150.0 118:3342.0 119:4404.0 120:250.0 121:561.0 122:231.0 123:183.0 127:2069.0 128:954.0 129:9572.0 130:2288.0 131:6910.0 133:12769.0 134:4790.0 135:5087.0 136:824.0 137:583.0 139…				0.24	0.1	86264	116093	61493	94673	31728	137908	83735	58969	81692	157962	130636	295268	77217	159708	97692	46945	63530	27972	145192	74501	33379	63050	42087	60331	88676	71709	329547	68396	91681	100679	84254	44296	128389	1651	91479	175370	7410	4154	1406	92330
382905	844730	259	382905	85:4802.0 87:1295.0 88:767.0 89:9132.0 90:896.0 97:7433.0 98:2380.0 99:2560.0 100:2644.0 101:8416.0 102:1912.0 103:33021.0 104:3309.0 105:3511.0 107:500.0 108:342.0 111:977.0 112:419.0 113:2200.0 114:1128.0 115:3548.0 116:6210.0 117:12483.0 118:1300.0 119:2215.0 123:174.0 125:445.0 126:585.0 127:2505.0 128:604.0 129:21329.0 130:3881.0 131:4076.0 132:2582.0 133:8718.0 134:1261.0 141:1263.0 142:126…				0.41	0	8045	523	9861	6228	1795	403	4687	4247	1300	716	828	2502	1780	3121	970	272	560	387	1046	1651	449	1086	716	2932	1218	888	550	1548	1488	1134	851	1766	1529	632	481	1118	158	225	933	477
382625	663173	299	382625	85:5928.0 86:34926.0 87:3971.0 88:1768.0 89:3155.0 90:352.0 91:2916.0 92:236.0 93:1931.0 94:415.0 95:4130.0 96:306.0 97:3794.0 98:2314.0 99:3010.0 100:15426.0 101:2835.0 102:2810.0 103:1772.0 104:416.0 105:3158.0 106:281.0 107:1214.0 108:101.0 109:1318.0 111:1738.0 112:812.0 113:1268.0 116:5287.0 117:55454.0 118:5712.0 119:2959.0 120:254.0 121:1497.0 123:471.0 125:586.0 126:422.0 127:772.0 129:25…				0.15	0	4503	3897	1535	4695	7075	4032	3027	4724	5598	3435	1494	1945	5971	1812	2493	2702	3403	4380	6689	3457	8249	10326	1451	5954	4038	5188	1581	8982	11936	6135	3597	3995	879	3442	801	4572	399	3388	890	12888
382616	709855	142	382616	87:605.0 91:126.0 92:211.0 93:471.0 94:229.0 95:1529.0 96:2117.0 97:1116.0 98:1271.0 101:953.0 103:1060.0 104:132.0 105:66.0 108:176.0 110:592.0 117:3947.0 124:318.0 126:247.0 129:6721.0 137:309.0 138:311.0 139:107.0 140:875.0 141:754.0 142:74626.0 143:9452.0 144:4883.0 145:1581.0 146:804.0 147:4364.0 152:452.0 155:266.0 185:112.0 197:132.0 200:164.0 204:651.0 209:84.0 214:376.0 217:1238.0 218:17…				0.13	0	999	834	737	440	489	526	630	403	799	874	778	180	564	7361	507	549	192	334	808	203	475	878	379	455	614	245	1426	799	1033	553	712	625	2681	475	472	314	1459	1191	2329	518
382613	614659	174	382613	86:19558.0 87:1799.0 88:866.0 100:8955.0 101:1386.0 102:2998.0 112:163.0 113:404.0 114:628.0 115:356.0 116:1264.0 117:1826.0 118:230.0 119:384.0 129:366.0 130:2960.0 131:854.0 132:589.0 133:1012.0 146:199.0 147:5649.0 148:580.0 149:473.0 155:175.0 156:328.0 157:123.0 160:1153.0 161:136.0 162:76.0 167:71.0 172:1088.0 174:35551.0 175:6305.0 176:5617.0 177:784.0 178:280.0 187:453.0 188:241.0 189:69.…				0.23	0	8318	1810	2396	3335	2675	2242	4566	1822	3307	2028	2823	1696	2308	12263	2576	3346	816	1564	4751	12713	1563	4962	2227	3974	3101	1577	3662	3450	5638	4565	2221	3779	5907	1193	1916	2619	3066	1973	1861	2290
382600	611347	312	382600	85:1193.0 86:1369.0 87:703.0 88:602.0 89:1260.0 90:618.0 91:1321.0 92:2891.0 93:1460.0 94:649.0 95:1860.0 96:500.0 97:1428.0 98:262.0 99:557.0 100:8701.0 101:1829.0 102:810.0 103:7162.0 104:2976.0 105:592.0 106:1175.0 107:182.0 108:369.0 109:833.0 110:404.0 111:500.0 112:127.0 113:282.0 115:491.0 116:503.0 118:332.0 119:530.0 120:2744.0 121:923.0 122:590.0 123:1122.0 124:335.0 125:382.0 126:432.0…				0.43	0	483	2257	1067	1486	1906	2205	1482	1170	875	1326	998	3668	1144	3062	1529	1378	863	1318	1298	2393	351	1372	920	2439	798	1568	1105	1476	1525	1501	1082	730	1921	3012	804	7695	442	414	999	457
382595	876988	217	382595	87:237.0 88:33.0 89:863.0 90:186.0 98:171.0 99:1298.0 101:2131.0 103:9245.0 104:997.0 105:869.0 111:1336.0 112:324.0 113:532.0 114:222.0 115:890.0 116:85.0 117:3924.0 119:686.0 120:51.0 124:93.0 125:432.0 127:1367.0 128:58.0 129:9104.0 130:2088.0 131:2502.0 132:61.0 133:4228.0 135:368.0 139:227.0 140:179.0 141:202.0 142:116.0 143:2153.0 144:56.0 145:14.0 146:36.0 147:7125.0 148:5.0 149:387.0 150:…				0.28	0	4857	2453	4509	2964	1867	3570	3479	3811	3123	1704	969	1014	5081	694	1457	3972	2159	3488	2768	2205	818	2612	1953	4611	3498	1615	2119	4901	4857	5212	1504	4761	7121	327	1414	5352	435	155	5168	6118
382573	825373	290	382573	89:123.0 145:333.0 147:1992.0 149:60.0 155:58.0 159:83.0 172:31.0 179:99.0 183:43.0 198:69.0 200:127.0 202:833.0 203:240.0 204:524.0 207:370.0 211:36.0 216:124.0 220:84.0 221:67.0 222:74.0 244:23.0 274:170.0 275:487.0 276:171.0 277:18.0 290:3672.0 291:1045.0 292:545.0 293:120.0 312:89.0 314:21.0 315:15.0 333:21.0 335:13.0 341:23.0 375:36.0 392:23.0 394:30.0 406:20.0 488:12.0				0.24	0	1881	68	1287	1309	782	638	1883	1390	1383	483	778	653	1515	176	933	939	484	506	1246	1122	758	1396	563	1766	1501	747	462	1873	2085	2041	1225	1082	2606	467	570	442	68	207	71	1655
382569	1011719	268	382569	85:628.0 86:66.0 89:398.0 91:623.0 92:116.0 96:199.0 97:414.0 98:94.0 99:79.0 103:1989.0 104:164.0 105:532.0 106:126.0 107:107.0 110:63.0 111:127.0 113:144.0 114:70.0 115:398.0 116:142.0 119:610.0 121:168.0 122:83.0 123:122.0 128:153.0 129:529.0 130:233.0 131:540.0 133:2154.0 134:210.0 135:418.0 137:84.0 138:52.0 141:116.0 142:47.0 143:685.0 144:54.0 146:57.0 147:5630.0 148:672.0 149:741.0 150:15…				0.24	0	248	195	247	296	110	259	113	170	3420	1422	223	11160	336	608	13128	704	8176	9404	22227	337	5482	10605	2316	6110	892	5241	3025	451	236	376	138	167	323	15678	1625	21573	197	52	141	18373
381422	279578	132	381422	85:289.0 86:934.0 88:150.0 90:102.0 93:73.0 96:224.0 97:95.0 99:139.0 101:722.0 102:596.0 106:32.0 107:77.0 113:487.0 114:626.0 115:523.0 116:1674.0 117:182.0 118:2616.0 119:164.0 120:204.0 122:42.0 128:74.0 129:142.0 130:5032.0 131:1010.0 132:6779.0 133:1239.0 134:137.0 135:236.0 136:102.0 141:29.0 144:176.0 145:4170.0 146:1543.0 154:65.0 157:112.0 158:34.0 159:261.0 160:947.0 161:216.0 162:93.0…				0.16	0.11	31698	27247	17681	20633	11353	19457	16818	19955	19680	12228	20769	20974	20217	19366	16193	19724	1641	23637	22562	19121	17581	17882	11451	16273	18411	21454	33399	23764	12294	30036	13868	14501	22478	34884	7704	24562	17325	8706	28723	13732
380685	419053	147	380685	91:198.0 95:392.0 104:107.0 111:168.0 126:104.0 131:744.0 138:42.0 145:144.0 147:8544.0 149:570.0 157:70.0 160:587.0 181:65.0 182:77.0 183:111.0 185:65.0 187:61.0 190:165.0 194:60.0 198:52.0 199:83.0 202:68.0 207:310.0 212:55.0 213:44.0 230:39.0 235:68.0 245:44.0 246:39.0 247:35.0 248:29.0 251:56.0 259:34.0 263:38.0 273:45.0 280:37.0 282:57.0 293:38.0 294:61.0 297:49.0 301:34.0 302:30.0 303:34.0 …				0	0.13	49543	17482	18708	14198	27642	19004	33796	42310	31967	23191	9833	19093	47822	14248	16147	12001	57076	15821	15527	35100	45006	29922	6296	43896	31124	23689	28801	77584	65497	18724	50953	27998	16923	25074	9583	16890	20136	22104	23174	41385
380578	744356	353	380578	87:138.0 90:91.0 97:189.0 105:196.0 107:94.0 126:132.0 129:647.0 146:81.0 147:1455.0 156:75.0 158:200.0 162:74.0 164:54.0 167:110.0 168:111.0 170:54.0 171:128.0 172:176.0 174:110.0 182:87.0 185:106.0 203:47.0 223:78.0 225:73.0 227:189.0 232:38.0 234:60.0 240:42.0 252:44.0 257:50.0 259:31.0 264:269.0 265:167.0 266:39.0 274:36.0 276:115.0 277:77.0 279:99.0 280:117.0 281:134.0 285:65.0 292:40.0 293:…				0.15	0	3775	3412	2280	4344	3730	1132	842	966	3500	950	1519	342	690	5116	1193	883	740	1449	4311	1183	2564	2451	1239	1094	2332	2188	440	1100	3113	1494	1050	889	1933	876	927	2995	358	380	1236	3120
379924	300692	147	379924	87:139.0 94:229.0 98:1050.0 100:730.0 101:480.0 103:1190.0 105:137.0 110:2026.0 113:54.0 114:1244.0 115:484.0 116:379.0 119:584.0 123:91.0 129:242.0 131:447.0 133:651.0 134:154.0 143:259.0 144:185.0 145:306.0 146:1399.0 147:17661.0 148:1310.0 150:136.0 159:307.0 161:130.0 163:225.0 168:85.0 172:1846.0 175:177.0 187:45.0 188:406.0 190:197.0 192:141.0 199:1317.0 200:216.0 202:43.0 203:85.0 206:83.0…				0.2	0.09	42925	19566	13795	27121	19073	26097	26896	38051	32510	9603	41217	22509	34058	27870	23255	41060	11271	29703	30615	41820	8307	27830	11386	22779	15882	31379	26059	12762	9752	49700	35293	26818	144779	41078	17339	24912	29590	8925	111338	17155
379577	624659	179	379577	103:1526.0 105:451.0 126:208.0 172:1402.0 177:148.0 179:5385.0 180:813.0 194:180.0 209:74.0 221:91.0 224:936.0 237:863.0 239:405.0 249:36.0 267:1222.0 283:238.0 304:39.0 305:141.0 332:133.0 339:587.0 354:749.0 369:208.0 383:42.0 386:65.0 387:39.0 423:24.0 477:25.0 484:26.0				0.16	0	2497	1358	1274	4653	1283	2758	4324	2793	2359	3264	2133	4469	3201	1347	2693	1536	1850	1710	2274	4372	3488	2822	1554	3969	3042	2383	2066	3527	3611	3758	2482	1409	3188	2509	1914	4431	306	118	1375	7455
379571	248487	85	379571	85:42224.0 86:788.0 91:1046.0 92:133.0 95:1831.0 96:288.0 97:1534.0 99:81.0 100:2223.0 109:681.0 111:102.0 113:204.0 114:481.0 124:106.0 125:292.0 127:1031.0 128:107.0 134:1005.0 160:62.0 163:82.0 164:55.0 168:253.0 170:88.0 173:44.0 174:41.0 187:77.0 190:184.0 198:50.0 200:38.0 202:38.0 214:53.0 215:45.0 218:62.0 234:66.0 242:80.0 243:40.0 244:53.0 247:67.0 249:1329.0 250:351.0 252:48.0 254:62.0…				0.01	0.18	11883	12013	9050	7379	4837	3823	8233	7612	9861	8337	9232	9868	8945	2228	7030	8101	4000	9514	12253	4160	3177	8884	5297	8863	2435	13773	11206	10682	5868	6304	7378	5936	2748	3534	5326	11823	10039	5254	10776	8664
379197	307332	112	379197	85:17519.0 86:749.0 89:300.0 91:712.0 98:3010.0 99:3508.0 112:2041.0 113:2225.0 141:805.0 143:186.0 166:48.0 168:104.0 170:1282.0 172:111.0 193:182.0 291:46.0 307:37.0 343:35.0 368:38.0 389:29.0 392:30.0 406:20.0 408:26.0 413:39.0 424:28.0 439:23.0				0.04	0.24	558	724	514	401	256	636	405	400	367	400	262	610	721	357	616	346	169	511	390	416	379	295	201	540	470	511	831	447	364	616	420	281	596	788	157	588	292	250	716	425
379154	206496	97	379154	97:6330.0 98:460.0 105:984.0 107:264.0 108:111.0 127:760.0 129:388.0 152:4084.0 160:478.0 167:523.0 170:95.0 198:71.0 212:40.0 218:494.0 394:21.0				0.09	0.13	20071	10956	29612	13139	6467	11333	7455	11260	2661	2747	8444	4501	6376	12703	4600	5525	2627	13654	35531	14793	8206	27735	6071	4352	7330	9624	8520	6677	3300	16743	7036	8709	17430	21514	227	12901	5848	3068	9616	5787
379063	562916	243	379063	85:1143.0 86:979.0 90:181.0 92:132.0 95:882.0 98:362.0 101:1370.0 102:958.0 103:1218.0 106:164.0 107:484.0 110:1002.0 112:963.0 117:1476.0 118:1023.0 119:694.0 124:119.0 126:704.0 127:662.0 128:630.0 129:1713.0 130:502.0 131:1892.0 132:936.0 133:4587.0 134:697.0 135:479.0 142:482.0 143:784.0 144:748.0 147:2103.0 148:929.0 149:1755.0 153:516.0 155:709.0 159:169.0 161:888.0 163:1283.0 164:165.0 166…				0	0.66	834	216	1145	743	125	154	737	444	622	392	546	491	718	540	525	619	180	166	219	993	260	241	305	329	560	511	509	602	840	700	564	186	887	448	68	79	1227	50	284	176
378368	474156	98	378368	96:152.0 98:4020.0 99:855.0 105:854.0 110:42.0 115:405.0 128:74.0 139:187.0 140:294.0 142:91.0 148:132.0 155:209.0 185:170.0 188:119.0 189:184.0 190:73.0 200:625.0 213:23.0 256:75.0 259:30.0 277:50.0 286:285.0 288:136.0 306:44.0 314:42.0 346:34.0				0.01	0.11	3748	4860	1543	3774	2518	4946	2384	4273	799	3881	2700	1703	3562	3629	3827	1492	2815	4349	5968	1256	3105	3756	1719	4413	4032	3388	3840	3752	3869	3415	2216	1956	5776	2355	1794	4530	5116	2002	2206	3799
378132	212499	177	378132	95:224.0 99:369.0 115:11969.0 123:663.0 126:112.0 130:8384.0 136:201.0 138:207.0 152:95.0 163:64.0 177:4398.0 178:601.0 179:35.0 180:49.0 198:48.0 206:252.0 212:36.0 215:54.0 217:223.0 231:43.0 240:32.0 289:27.0 297:38.0 308:24.0 317:36.0 341:68.0 393:38.0 431:31.0 441:24.0 447:28.0 453:23.0 466:20.0 468:41.0 470:21.0 482:23.0				0.06	0.15	2811	911	1237	4290	8350	1322	11884	4161	2537	396	1967	1985	866	1366	1488	1039	1144	1344	3793	6767	369	2075	1868	569	2139	2971	1236	1818	2428	8527	5570	2584	8558	7594	829	2506	4264	8539	5847	1424
377384	703712	393	377384	85:645.0 90:147.0 95:452.0 97:249.0 102:285.0 103:9020.0 110:146.0 113:61.0 115:644.0 117:1981.0 118:490.0 119:534.0 126:187.0 127:417.0 129:990.0 132:235.0 133:1022.0 134:645.0 135:662.0 141:297.0 143:947.0 144:439.0 146:210.0 147:17366.0 149:2554.0 151:169.0 159:329.0 162:131.0 164:69.0 165:146.0 166:56.0 169:242.0 170:120.0 175:586.0 179:102.0 185:91.0 186:85.0 189:1565.0 190:633.0 199:60.0 20…				0.01	0.26	137	107	60	100	33	121	56	63	31	75	71	85	75	60	95	84	20	57	49	41	51	62	43	136	63	73	78	111	119	91	54	39	250	172	42	64	46	162	362	36
372464	673547	256	372464	85:1950.0 86:917.0 89:6363.0 90:1254.0 95:444.0 98:895.0 99:5976.0 100:3339.0 103:13587.0 104:888.0 105:1857.0 107:285.0 109:477.0 111:725.0 112:781.0 113:1004.0 114:1904.0 115:1762.0 116:2314.0 117:7744.0 118:1170.0 119:1316.0 120:190.0 124:187.0 125:121.0 126:849.0 127:933.0 128:1283.0 129:8745.0 130:3580.0 131:3552.0 132:2603.0 133:7353.0 135:749.0 136:369.0 139:244.0 140:1331.0 141:4575.0 142…				0.03	0.2	660	770	488	683	165	510	535	241	431	315	320	432	544	1683	461	144	122	285	542	407	176	217	127	249	212	251	921	306	526	620	650	308	615	714	272	586	1491	214	338	280
371571	399076	188	371571	85:829.0 86:897.0 87:815.0 88:451.0 89:608.0 90:204.0 93:97.0 94:114.0 95:445.0 96:368.0 97:670.0 98:213.0 99:592.0 100:26078.0 101:3331.0 102:1154.0 105:1292.0 106:79.0 111:295.0 112:195.0 113:257.0 114:4918.0 115:1232.0 116:2014.0 117:18591.0 118:1946.0 119:1090.0 121:129.0 129:7696.0 130:2042.0 131:6596.0 132:4847.0 133:5190.0 134:751.0 135:408.0 139:106.0 142:42.0 143:3554.0 144:203.0 145:206…				0.04	0.13	2322	4797	2870	2012	1945	2688	2421	1751	4360	17090	6211	4419	5393	7462	2514	4592	1722	2157	2130	1534	6382	3991	2663	7067	5802	5672	2743	3614	8426	3274	2550	1219	4913	2646	49019	2622	5630	11813	1705	3206
371561	674533	333	371561	85:4111.0 86:5249.0 87:4621.0 88:1160.0 89:16451.0 90:1300.0 91:3261.0 92:392.0 93:1588.0 94:498.0 95:2976.0 96:2224.0 97:1536.0 98:770.0 99:2171.0 100:10981.0 101:3629.0 102:4405.0 103:25485.0 104:3484.0 105:4348.0 106:911.0 107:2590.0 108:424.0 109:1766.0 110:1141.0 113:1114.0 114:1311.0 115:3286.0 119:2121.0 120:548.0 121:553.0 123:1174.0 124:392.0 125:575.0 128:2018.0 131:5458.0 137:2797.0 13…				0.03	0.18	2499	34546	2740	2558	1135	5012	1040	1306	876	778	1381	10291	901	5182	2195	852	474	1676	1749	1096	566	1311	691	4653	691	2291	6589	646	1406	1165	1181	444	995	7246	917	23302	3059	327	1295	680
371546	680823	361	371546	85:28932.0 86:14914.0 87:27482.0 88:21174.0 89:221486.0 90:18670.0 91:26306.0 92:1070.0 93:1723.0 94:2098.0 95:4197.0 96:7059.0 97:12750.0 98:7425.0 99:30846.0 100:42226.0 101:102730.0 102:47834.0 103:421414.0 104:48795.0 105:48308.0 106:6153.0 107:3215.0 108:936.0 109:12471.0 110:9524.0 111:24593.0 112:9014.0 113:22704.0 114:18076.0 115:42070.0 116:44754.0 117:201831.0 118:29570.0 119:35485.0 12…				0.48	0.59	1561	749	398	638	343	445	663	196	2016	138	432	551	333	1577	903	380	162	176	462	459	475	440	309	218	256	1005	417	318	533	521	454	436	1185	364	94	314	21519	414	337	306
371262	773095	195	371262	85:3346.0 86:2172.0 87:2767.0 88:1248.0 89:7232.0 90:802.0 91:2250.0 92:606.0 93:3278.0 94:3150.0 95:3757.0 96:852.0 97:764.0 98:3943.0 99:3102.0 100:8658.0 101:2912.0 102:1637.0 103:9006.0 104:1205.0 105:1328.0 106:1066.0 107:1502.0 108:1185.0 109:16302.0 110:1915.0 111:2624.0 112:873.0 113:3092.0 114:1702.0 115:3165.0 116:2733.0 117:2529.0 118:596.0 119:1649.0 120:555.0 121:1478.0 122:470.0 123…				0.04	0.16	210	1161	120	114	43	828	902	86	66	1119	900	91	161	86	45	74	384	50	2465	673	723	2509	445	662	599	1812	135	106	2028	178	103	65	63	221	97	175	67	25	117	1354
370761	224146	110	370761	85:5235.0 86:4447.0 87:4590.0 88:11461.0 89:3317.0 90:2141.0 91:8589.0 92:2542.0 93:895.0 94:158.0 95:326.0 96:2921.0 97:10710.0 98:8753.0 99:5876.0 100:15803.0 101:12046.0 102:3720.0 103:840.0 104:3230.0 105:1626.0 106:2826.0 107:3196.0 108:44544.0 109:3124.0 110:256088.0 111:9656.0 112:863.0 113:1140.0 114:1614.0 115:158365.0 116:19288.0 117:6936.0 118:15459.0 119:2074.0 120:3437.0 121:6712.0 1…				0	0.43	1527	2505	1773	2110	1154	271	1522	1593	1347	338	499	994	1777	736	1098	1314	844	2421	631	2270	232	611	924	341	178	2581	456	1376	549	1289	463	1406	2500	1432	6984	1200	562	1714	2691	1389
370223	773174	227	370223	85:2111.0 86:1654.0 87:1789.0 88:1245.0 89:2565.0 90:476.0 91:1360.0 92:383.0 93:1514.0 94:800.0 95:1372.0 96:438.0 97:912.0 98:1854.0 99:2007.0 100:4892.0 101:3095.0 102:1048.0 103:5417.0 104:559.0 105:1396.0 106:803.0 107:1281.0 108:663.0 109:8044.0 110:929.0 111:2940.0 112:889.0 113:3439.0 114:1312.0 115:2603.0 116:2148.0 117:2323.0 118:354.0 119:2058.0 120:315.0 121:1052.0 122:272.0 123:773.0…				0.2	0.25	891	450	436	642	473	520	477	440	471	451	368	379	358	467	370	289	97	367	1267	391	464	671	234	582	469	874	675	758	602	653	672	438	560	688	169	457	496	82	700	602
370160	924574	204	370160	85:2309.0 86:350.0 87:2499.0 88:1108.0 89:6987.0 90:636.0 91:572.0 94:231.0 97:827.0 98:212.0 99:1505.0 101:16087.0 102:2156.0 103:60909.0 104:4810.0 105:2147.0 106:154.0 109:888.0 110:31.0 111:1071.0 112:162.0 113:2205.0 114:515.0 115:1697.0 116:9236.0 117:35261.0 118:3653.0 119:2730.0 120:130.0 121:148.0 122:84.0 123:75.0 127:447.0 128:25.0 129:52898.0 130:6838.0 131:7933.0 132:1130.0 133:11934…				0.32	0.01	1084	12766	2248	2567	525	6226	1196	1377	1552	439	4620	1343	504	3161	2904	1999	363	578	1003	934	13318	1164	381	591	14544	2408	632	892	361	834	1886	1556	1268	1033	167	359	23299	408	20488	433
367427	1029140	243	367427	85:3550.0 87:1782.0 88:133.0 89:715.0 91:533.0 93:956.0 95:1170.0 97:2063.0 98:2662.0 99:2175.0 101:2997.0 102:880.0 103:4861.0 104:475.0 105:235.0 106:277.0 107:222.0 108:216.0 109:1632.0 110:334.0 111:479.0 112:821.0 113:2234.0 114:173.0 115:2368.0 116:714.0 119:844.0 121:681.0 122:214.0 123:915.0 127:372.0 129:49014.0 130:7653.0 131:6616.0 132:883.0 133:7408.0 134:311.0 135:2653.0 136:234.0 13…				0	0.38	350	348	578	99	135	238	273	207	192	102	325	127	253	152	268	273	82	151	710	151	130	234	84	176	196	286	246	233	207	202	95	104	304	145	93	241	118	54	340	164
366068	1205421	297	366068	85:5041.0 86:653.0 87:778.0 88:262.0 89:682.0 90:181.0 91:1936.0 93:2837.0 94:2138.0 95:14935.0 96:6803.0 97:5147.0 98:3977.0 99:3233.0 100:1511.0 101:1724.0 102:346.0 103:9374.0 104:799.0 105:838.0 106:515.0 107:1460.0 108:945.0 109:6704.0 110:1909.0 111:2923.0 112:1316.0 113:3244.0 114:964.0 115:1871.0 116:1071.0 117:1676.0 118:321.0 119:465.0 120:245.0 121:1231.0 122:321.0 123:2217.0 124:582.0…				0	0.36	204	244	130	117	60	96	133	120	73	95	63	166	145	93	98	86	80	151	82	85	136	77	66	189	89	232	325	98	42	185	63	73	144	219	64	110	49	34	194	133
365909	357960	211	365909	103:660.0 104:194.0 105:704.0 106:159.0 107:1325.0 111:219.0 112:60.0 115:2538.0 119:1413.0 121:1026.0 122:92.0 123:1498.0 126:129.0 127:98.0 131:605.0 132:62.0 133:6811.0 134:962.0 135:3004.0 136:238.0 137:1442.0 138:146.0 139:190.0 143:176.0 147:3145.0 148:645.0 149:243.0 153:407.0 154:53.0 155:131.0 156:48.0 167:513.0 168:82.0 174:243.0 176:32.0 178:140.0 179:360.0 181:2446.0 182:210.0 183:867…				0	0.2	416	210	198	130	90	102	112	104	143	80	33	133	207	206	116	59	176	90	88	141	322	31	29	103	198	191	121	123	281	95	107	100	196	104	21	378	136	25	196	242
365826	940977	401	365826	87:4282.0 88:2386.0 89:9138.0 94:1197.0 96:15664.0 97:3566.0 100:97787.0 101:23590.0 102:21768.0 103:35434.0 108:2587.0 109:5800.0 110:3283.0 114:18773.0 115:65946.0 116:90892.0 117:43800.0 118:8076.0 120:2384.0 125:4215.0 126:2288.0 127:3666.0 128:29730.0 130:12114.0 131:42272.0 132:19914.0 134:4224.0 136:3968.0 140:6164.0 141:15356.0 142:59228.0 143:16308.0 144:19521.0 147:156454.0 148:30640.0 …				0.19	0	152	124	78	109	81	164	65	76	85	109	75	127	119	107	209	158	48	107	119	146	88	67	67	131	133	148	198	146	58	181	124	79	205	203	60	221	4512	254	168	152
365431	401747	194	365431	85:128.0 86:244.0 88:157.0 89:142.0 90:233.0 91:706.0 92:4376.0 93:2541.0 94:526.0 96:91.0 97:641.0 98:180.0 99:129.0 100:4236.0 106:240.0 109:607.0 110:1002.0 112:338.0 115:107.0 120:2730.0 121:237.0 122:318.0 123:6829.0 124:2908.0 125:671.0 131:2352.0 132:211.0 134:43.0 136:330.0 137:164.0 139:482.0 150:1851.0 151:201.0 152:398.0 154:151.0 160:74.0 164:120.0 165:158.0 166:1778.0 167:1014.0 168:…				0.27	0	718	1994	466	683	895	1126	1360	513	537	833	517	1871	1093	1530	1145	1068	484	889	681	1414	1856	555	458	1705	620	1113	751	926	1043	586	2288	392	974	1461	762	5021	600	305	91	977
365292	993609	237	365292	89:192.0 91:766.0 92:89.0 93:716.0 94:172.0 95:525.0 97:233.0 98:94.0 99:164.0 101:297.0 103:425.0 104:137.0 105:796.0 106:78.0 107:462.0 108:81.0 109:159.0 111:190.0 112:120.0 115:264.0 116:317.0 117:793.0 118:139.0 119:518.0 120:73.0 121:172.0 122:51.0 123:166.0 128:98.0 129:1299.0 130:301.0 131:330.0 133:390.0 135:288.0 136:101.0 143:375.0 145:395.0 147:576.0 149:210.0 150:60.0 151:121.0 155:6…				0.46	0	4724	3911	2266	4256	6396	2093	4836	1237	1039	620	298	1939	2460	790	1518	905	4196	970	1063	2700	6585	1659	1050	3006	554	1348	513	1745	3449	2595	2243	890	5266	2089	755	4004	426	349	5607	2034
364096	796443	304	364096	96:686.0 97:316.0 100:1755.0 102:448.0 113:44.0 114:168.0 115:574.0 124:319.0 128:369.0 130:838.0 133:629.0 136:217.0 137:148.0 138:172.0 140:221.0 146:337.0 147:3491.0 148:639.0 149:930.0 150:324.0 154:104.0 158:145.0 159:354.0 160:394.0 162:103.0 168:43.0 172:609.0 173:625.0 179:72.0 186:120.0 187:306.0 188:2219.0 189:537.0 190:343.0 198:34.0 200:137.0 201:200.0 202:1007.0 203:79.0 212:127.0 21…				0.44	0	3867	210	1676	2796	674	1603	2966	1015	982	2712	450	1615	7021	242	2791	442	681	877	1081	971	726	1410	408	849	646	1441	575	780	2385	1355	1232	741	287	902	1501	416	213	95	1499	1786
360154	545613	99	360154	85:296.0 88:59.0 89:1934.0 90:173.0 99:24212.0 101:520.0 102:1718.0 103:18494.0 104:1670.0 105:1368.0 111:485.0 112:270.0 117:1506.0 118:234.0 122:229.0 125:1322.0 126:142.0 129:1254.0 133:3558.0 137:800.0 147:8408.0 148:1624.0 155:3513.0 160:1818.0 161:363.0 163:192.0 176:41.0 189:1521.0 190:198.0 198:220.0 203:122.0 204:418.0 205:462.0 206:254.0 216:164.0 217:7319.0 218:1334.0 219:484.0 222:101…				0.37	0.16	47308	115289	131901	161683	9604	23337	67319	158005	91048	82808	17965	5881	143823	11205	25015	26006	94344	134029	199597	3843	63907	16697	89115	25878	18648	23712	14720	2915	99320	237680	99051	103467	251942	25838	5776	66777	11943	13857	179852	150152
360148	470717	179	360148	87:452.0 88:665.0 89:2180.0 90:188.0 92:235.0 96:626.0 99:595.0 101:2726.0 103:14717.0 104:4840.0 105:7450.0 106:1308.0 109:139.0 110:633.0 112:167.0 113:576.0 115:900.0 116:1204.0 117:11287.0 118:1539.0 119:1290.0 120:458.0 122:528.0 127:328.0 129:4327.0 130:411.0 131:1716.0 133:5428.0 134:3427.0 135:825.0 136:13707.0 137:1522.0 138:640.0 143:1342.0 147:24658.0 148:4258.0 149:3070.0 150:248.0 15…				0.16	0.25	4487	1716	1871	3877	1716	1563	4375	1043	1588	2128	1199	101	1826	1187	1977	1528	2243	3359	851	3211	5384	2693	2494	2607	2514	4355	2459	2576	2692	2369	1884	1010	2819	121	2614	2509	554	2047	152	6380
360147	572384	218	360147	85:4717.0 86:733.0 87:7505.0 88:434.0 89:1466.0 90:260.0 91:1424.0 94:255.0 95:831.0 99:2290.0 100:31327.0 101:4862.0 102:3741.0 103:14172.0 104:1453.0 105:733.0 109:96.0 111:145.0 112:683.0 113:1012.0 114:1668.0 115:1579.0 116:2488.0 117:5658.0 118:666.0 119:785.0 121:252.0 126:267.0 127:564.0 128:2724.0 129:10851.0 130:324.0 131:2583.0 132:275.0 133:3444.0 134:809.0 135:450.0 136:177.0 137:326.…				0.05	0.11	1170	1135	379	6091	4655	1096	8126	6929	2595	2322	2273	211	10187	4950	1521	5214	967	745	1342	132	1792	1680	1039	3806	2229	2529	2230	6478	10724	10247	8326	6579	13724	233	2030	942	12362	721	292	1110
357049	762311	243	357049	85:1862.0 86:674.0 87:2478.0 88:874.0 89:7939.0 90:788.0 97:591.0 98:490.0 99:1644.0 101:3603.0 102:4389.0 103:30066.0 104:3069.0 105:1816.0 111:912.0 112:367.0 113:914.0 115:1171.0 116:1079.0 117:28479.0 118:2850.0 119:2463.0 120:345.0 121:263.0 125:294.0 127:346.0 129:42191.0 130:7485.0 131:7148.0 132:636.0 133:15819.0 134:1975.0 135:2045.0 137:204.0 141:915.0 142:875.0 143:6792.0 144:850.0 145…				0.19	0	360	240	226	173	69	226	114	150	193	473	103	235	129	373	228	176	174	145	212	1965	99	117	193	254	527	211	301	190	204	246	213	279	297	258	156	446	2099	311	258	164
357024	910014	317	357024	85:2241.0 86:678.0 87:697.0 88:117.0 89:1024.0 90:177.0 91:3743.0 92:425.0 93:3809.0 94:898.0 95:4262.0 96:1025.0 97:844.0 98:201.0 99:921.0 101:2678.0 102:637.0 103:4334.0 104:452.0 105:1089.0 106:277.0 107:1375.0 108:381.0 109:14442.0 110:1299.0 111:1353.0 113:976.0 114:215.0 115:1213.0 116:1820.0 117:3839.0 118:640.0 119:4011.0 120:497.0 123:366.0 124:185.0 125:533.0 127:710.0 129:16706.0 130:…				0.35	0	3769	649	1099	831	1175	621	1194	861	2509	887	663	136	2979	473	1124	321	2000	510	1029	931	1400	1106	487	684	2159	884	818	138	3140	1528	368	595	126	147	526	732	151	63	1938	1100
356988	763084	157	356988	86:126.0 87:651.0 89:219.0 93:389.0 95:495.0 97:5495.0 98:624.0 99:1304.0 101:1261.0 102:174.0 103:729.0 104:177.0 109:1563.0 110:166.0 111:2224.0 112:356.0 113:1561.0 114:419.0 115:725.0 116:201.0 117:1715.0 119:154.0 123:233.0 124:81.0 126:1942.0 127:4101.0 128:508.0 129:518.0 132:443.0 133:272.0 138:366.0 139:4066.0 140:414.0 141:389.0 142:108.0 143:1210.0 144:256.0 145:145.0 146:76.0 148:783.…				0.33	0.01	2243	2103	1386	1643	823	1480	1296	1461	2593	1348	2445	1872	2139	1658	1799	2670	850	1113	1709	888	1313	2248	1488	1596	1436	1808	2643	1409	1116	2196	1300	803	2021	5287	767	1984	1314	665	4940	1492
356984	312674	261	356984	86:2390.0 87:218.0 88:443.0 90:69.0 96:176.0 99:845.0 100:6622.0 101:827.0 102:391.0 103:494.0 110:1799.0 114:610.0 116:996.0 119:635.0 121:570.0 123:106.0 128:573.0 130:681.0 131:748.0 133:3114.0 134:856.0 135:379.0 142:158.0 144:15241.0 145:2502.0 146:1091.0 147:10924.0 148:1478.0 149:1055.0 150:137.0 151:497.0 152:107.0 156:176.0 158:163.0 160:547.0 161:157.0 162:87.0 163:92.0 164:153.0 166:12…				0.18	0.08	1827	1423	1415	931	656	1252	1243	973	866	739	809	1239	2144	1103	1378	876	618	1315	962	940	908	620	440	1126	806	1082	1589	958	838	1149	1387	907	1555	1964	386	1626	900	402	1696	815
356941	343519	174	356941	85:2148.0 86:14705.0 87:983.0 88:1082.0 90:270.0 91:276.0 97:246.0 98:717.0 100:15183.0 101:3073.0 105:1231.0 109:934.0 113:214.0 114:1772.0 116:3005.0 117:23514.0 118:1247.0 119:2059.0 120:507.0 124:60.0 129:8268.0 130:2736.0 131:8240.0 132:6601.0 133:10428.0 135:1205.0 143:1044.0 144:516.0 145:2213.0 146:712.0 154:101.0 157:521.0 173:839.0 174:33984.0 175:6780.0 176:2036.0 180:145.0 181:514.0 1…				0.28	0.08	98777	67929	80927	52445	196843	56115	114753	120485	56980	67077	99860	57922	59369	99185	41713	102215	40277	48173	79628	68706	53955	107301	25449	66389	41220	72142	34132	91581	123596	188898	130343	100739	75379	49482	19996	57357	28457	111162	127220	49219
356925	610264	145	356925	85:291.0 86:1097.0 87:1641.0 88:553.0 89:5534.0 90:316.0 91:160.0 97:156.0 100:510.0 101:2115.0 102:247.0 103:6871.0 104:755.0 105:576.0 106:61.0 108:99.0 111:250.0 113:179.0 114:3760.0 115:1803.0 116:2021.0 117:6637.0 118:756.0 119:1094.0 123:69.0 124:134.0 125:120.0 126:166.0 128:145.0 129:3594.0 130:673.0 131:1780.0 132:298.0 133:6570.0 134:835.0 135:998.0 137:146.0 138:38.0 139:71.0 140:108.0…				0.13	0.31	1711	939	692	1092	484	674	939	459	905	499	386	242	1027	613	970	484	550	594	584	1592	654	593	313	582	847	920	937	608	815	632	803	623	983	665	394	871	4198	508	960	715
356347	964431	272	356347	89:706.0 90:118.0 91:341.0 96:602.0 101:370.0 102:450.0 103:4373.0 104:411.0 109:126.0 112:70.0 114:317.0 115:405.0 116:1392.0 117:1764.0 118:423.0 120:93.0 124:36.0 125:41.0 127:137.0 128:1168.0 130:155.0 131:674.0 133:751.0 138:141.0 139:100.0 141:111.0 142:2140.0 143:546.0 144:249.0 147:2488.0 148:815.0 151:103.0 153:28.0 154:127.0 157:575.0 158:157.0 168:209.0 170:71.0 177:188.0 179:154.0 182…				0	0.31	212	157	122	307	78	220	71	195	75	384	211	74	157	128	198	187	41	177	486	68	120	250	163	463	308	228	119	94	306	255	199	186	137	121	95	166	6773	152	115	116
355616	806895	204	355616	86:5934.0 87:1039.0 88:3357.0 89:3008.0 91:13757.0 92:2300.0 100:10486.0 101:5774.0 102:4403.0 103:6769.0 104:3812.0 105:650.0 114:3322.0 115:2698.0 116:14288.0 119:1473.0 120:6766.0 121:626.0 128:1653.0 130:2378.0 131:3241.0 132:6476.0 133:692.0 134:813.0 135:494.0 158:13606.0 160:1385.0 161:581.0 162:946.0 172:499.0 174:4305.0 175:680.0 180:198.0 187:192.0 188:8219.0 189:1163.0 190:968.0 192:27…				0.14	0	1871	1415	489	752	425	1267	855	661	1284	408	706	849	949	2933	1078	692	432	692	1594	966	510	1343	461	1168	1073	532	1579	1053	1084	1121	577	496	1288	591	742	1634	4429	242	1705	700
354261	299556	110	354261	85:595.0 87:244.0 89:954.0 90:251.0 91:1128.0 92:42.0 93:164.0 96:2060.0 98:223.0 106:545.0 107:56.0 108:293.0 109:613.0 110:12664.0 111:690.0 112:155.0 114:1059.0 115:549.0 117:1847.0 118:342.0 119:251.0 120:264.0 122:395.0 124:3972.0 125:635.0 128:543.0 130:6322.0 131:824.0 132:262.0 134:391.0 135:527.0 136:866.0 137:497.0 138:66.0 140:249.0 143:297.0 144:260.0 146:1282.0 147:4145.0 150:78.0 15…				0.44	0.78	8722	7464	7847	6019	2583	4751	5599	5223	4440	4768	4040	8594	7894	4807	6552	579	4051	7432	2482	6769	4642	2144	2599	6556	5013	7342	10026	6582	4192	7979	4942	3783	6828	4800	2295	8164	2524	3099	1056	6263
353925	571273	272	353925	86:1006.0 89:376.0 90:86.0 92:163.0 98:617.0 100:1667.0 105:140.0 106:295.0 108:661.0 109:471.0 110:725.0 111:225.0 112:84.0 113:281.0 119:67.0 124:77.0 126:648.0 128:541.0 130:486.0 131:961.0 132:163.0 133:1896.0 134:216.0 138:151.0 140:459.0 141:127.0 142:567.0 144:1792.0 147:5549.0 148:443.0 149:1089.0 150:177.0 151:98.0 152:29.0 154:5564.0 155:1287.0 156:1835.0 157:284.0 158:190.0 164:47.0 16…				0.71	0	4630	7697	2282	2467	4093	9045	5188	3667	6503	5219	3884	5940	5131	9121	7350	3009	3697	6437	4422	2549	8684	3884	2873	6997	3100	5338	8733	6890	8806	4735	3406	2356	6075	10063	929	8050	515	3883	2898	3878
353893	600208	169	353893	87:372.0 90:75.0 91:1257.0 92:674.0 93:3198.0 94:252.0 95:775.0 97:467.0 98:338.0 99:1402.0 101:2181.0 102:546.0 105:533.0 108:111.0 109:846.0 111:1020.0 113:88.0 116:3193.0 117:1249.0 118:379.0 119:517.0 120:161.0 121:1557.0 126:109.0 127:867.0 129:3585.0 130:851.0 131:1565.0 132:529.0 133:3117.0 134:454.0 135:1089.0 136:298.0 137:339.0 139:127.0 140:1357.0 141:6930.0 142:1540.0 143:1128.0 147:1…				0.13	0	4175	3460	5140	5213	3793	3895	4074	4196	3505	3118	926	2098	4100	665	3837	2121	2697	2779	3098	7104	5569	3865	2110	4177	4556	4495	646	5365	6555	6474	318	294	615	2245	1444	4493	946	1487	659	6064
353614	402082	154	353614	88:64.0 99:182.0 100:1418.0 101:226.0 107:128.0 110:2010.0 111:88.0 114:515.0 118:65.0 123:56.0 130:55.0 131:136.0 132:91.0 134:790.0 140:41.0 142:113.0 144:166.0 147:993.0 148:146.0 150:47.0 154:6533.0 155:254.0 158:66.0 164:47.0 166:66.0 172:28.0 174:101.0 181:403.0 184:675.0 185:33.0 188:47.0 190:661.0 194:320.0 195:59.0 200:67.0 206:434.0 209:110.0 213:90.0 220:33.0 232:608.0 233:132.0 234:31…				0.43	0.31	649	1288	5187	456	102	1339	1522	238	210	8651	302	7547	8505	159	2674	989	3421	247	301	295	2491	373	144	8222	4170	1068	2279	4225	7107	262	3447	171	326	606	890	1652	426	615	3606	3472
352123	188391	160	352123	86:2032.0 87:1578.0 88:397.0 89:1061.0 91:281.0 93:2536.0 100:2230.0 101:642.0 102:1003.0 103:1556.0 104:236.0 105:816.0 106:269.0 110:3385.0 111:1040.0 112:83.0 113:573.0 115:873.0 117:2108.0 118:934.0 119:547.0 120:207.0 125:1926.0 131:3993.0 132:5748.0 133:3014.0 134:480.0 136:1131.0 138:150.0 142:198.0 144:441.0 146:202.0 147:30394.0 148:4757.0 149:2477.0 150:260.0 158:242.0 159:176.0 160:208…				0.29	0.06	10332	2506	3455	9977	5434	5265	3742	8493	7753	1103	6799	2445	8344	9260	5176	3840	1840	15628	7606	9414	3603	6966	7167	2891	1621	6045	4155	2496	1945	9935	3475	9426	8508	17651	97	4049	3403	614	7775	2646
351285	533077	248	351285	85:393.0 86:846.0 88:1040.0 94:66.0 95:863.0 98:366.0 99:901.0 100:3672.0 101:1670.0 103:14542.0 104:1335.0 105:683.0 116:4162.0 117:2127.0 118:173.0 119:512.0 120:281.0 131:1691.0 132:780.0 133:6712.0 135:524.0 137:132.0 143:1040.0 147:18712.0 148:2519.0 149:3716.0 150:429.0 151:286.0 158:1246.0 160:515.0 163:644.0 170:85.0 171:355.0 173:1100.0 175:263.0 176:235.0 177:133.0 179:248.0 187:215.0 1…				0.01	0.21	125	16172	3936	134	219	40	71	83	4387	12934	293	8396	2998	518	32	1855	8832	59	240	2286	34	336	72	546	98	95	14432	2449	4262	112	53	53	127	7905	4463	6095	17824	23	662	43
351271	686323	156	351271	86:579.0 92:202.0 98:146.0 107:461.0 112:143.0 120:68.0 123:118.0 125:218.0 126:92.0 133:551.0 140:617.0 141:736.0 147:1629.0 148:295.0 154:257.0 156:17234.0 157:2513.0 170:96.0 174:1765.0 175:169.0 177:119.0 188:110.0 207:696.0 208:405.0 209:268.0 212:81.0 221:2807.0 222:699.0 223:635.0 224:70.0 242:159.0 249:94.0 251:49.0 252:78.0 253:55.0 266:26.0 267:49.0 281:162.0 282:169.0 285:72.0 295:397.…				0	0.31	1679	2186	1065	1608	792	1033	1068	706	1765	982	1297	1660	570	3589	1113	539	448	572	2132	702	665	1240	564	413	680	890	4670	881	1648	1088	1056	818	1860	2142	1108	1468	871	350	1031	977
351222	250484	245	351222	85:8116.0 92:1253.0 94:509.0 96:318.0 97:548.0 98:1550.0 99:11644.0 103:2632.0 105:1536.0 106:345.0 107:7115.0 108:1443.0 109:249.0 110:564.0 111:2036.0 112:394.0 113:3835.0 115:43380.0 116:17673.0 117:4269.0 124:105.0 125:695.0 126:917.0 127:7145.0 128:2134.0 129:1818.0 132:3958.0 138:126.0 139:3480.0 140:821.0 141:3018.0 142:1238.0 143:2019.0 144:1875.0 145:786.0 151:395.0 152:254.0 153:172.0 1…				0.25	0.66	1459	2006	847	1026	758	1180	670	1158	976	660	1199	678	1058	1522	689	763	278	1271	1628	1032	850	1107	530	742	760	1021	955	687	594	1538	1050	794	2347	1346	365	1492	934	306	1236	859
350351	922949	319	350351	85:2621.0 86:1256.0 88:1720.0 89:9418.0 90:188.0 95:559.0 96:230.0 97:3833.0 99:1885.0 100:3267.0 101:6351.0 102:2466.0 103:37630.0 104:3491.0 105:1996.0 108:645.0 109:1344.0 111:1857.0 112:973.0 113:1221.0 114:1204.0 115:4170.0 116:3850.0 117:16604.0 118:2261.0 120:308.0 124:272.0 126:1213.0 127:1894.0 128:581.0 129:22650.0 130:5963.0 131:3108.0 133:11173.0 136:748.0 137:199.0 138:465.0 140:297.…				0.14	0	416	209	458	197	124	187	89	169	225	67	77	237	325	514	0	109	108	53	88	102	178	198	32	16	172	131	74	114	333	159	200	148	484	147	107	143	124	77	566	57
347748	952169	395	347748	91:27139.0 92:6717.0 93:30097.0 94:14007.0 95:24994.0 96:5257.0 99:1249.0 103:34037.0 104:3531.0 105:12372.0 106:5356.0 107:11818.0 108:4703.0 109:7994.0 110:4595.0 117:3986.0 119:7799.0 120:3263.0 121:4906.0 122:3034.0 123:7278.0 124:2578.0 129:69561.0 130:3469.0 131:11172.0 133:8198.0 134:1355.0 135:3203.0 136:3423.0 137:3562.0 138:646.0 140:127.0 144:505.0 147:13678.0 148:3007.0 149:5988.0 150…				0.41	0	8557	1350	2157	3261	2234	1441	450	1065	4345	4403	1736	928	12110	1196	1976	1259	389	1337	2561	432	1084	5638	1397	2359	1972	2910	1054	59	6355	2926	2644	1545	976	106	843	1048	549	97	77	3318
347728	607683	334	347728	86:8191.0 87:1328.0 88:808.0 94:169.0 97:992.0 98:210.0 100:3295.0 102:765.0 104:1828.0 105:503.0 110:468.0 111:155.0 112:750.0 118:945.0 119:295.0 120:219.0 122:212.0 125:121.0 128:937.0 130:2863.0 131:1182.0 132:578.0 134:668.0 139:132.0 142:424.0 144:287.0 146:418.0 147:1666.0 148:399.0 149:753.0 150:72.0 151:939.0 152:312.0 153:367.0 154:82.0 155:329.0 156:169.0 157:107.0 158:878.0 160:128.0 …				0	0.74	152	87	64	72	29	138	117	91	174	141	99	90	108	61	150	100	134	306	154	54	61	86	49	146	224	118	127	172	80	118	84	53	182	129	76	171	82	19	123	153
347323	601578	102	347323	85:953.0 86:2820.0 87:328.0 88:372.0 91:347.0 93:217.0 99:445.0 100:1209.0 102:22319.0 103:1226.0 104:953.0 105:258.0 107:126.0 113:200.0 114:24.0 118:35.0 128:368.0 130:668.0 132:283.0 133:1188.0 137:44.0 142:678.0 143:247.0 144:141.0 146:401.0 147:1722.0 148:367.0 149:818.0 154:554.0 155:2615.0 156:1561.0 158:168.0 160:369.0 163:158.0 167:245.0 172:367.0 174:4616.0 175:423.0 187:158.0 202:49.0 …				0.47	0	3527	3171	15350	5208	16087	25087	167999	4088	56126	10172	16749	22063	22309	2091	53108	71764	77882	3013	25190	3549	13039	24269	47105	32396	35094	18406	6937	125052	25284	18820	680	39987	2759	21741	3153	12103	1833	246	7293	30676
346438	359674	160	346438	88:204.0 89:302.0 97:577.0 98:266.0 100:3430.0 101:381.0 102:456.0 104:94.0 107:163.0 108:179.0 110:4022.0 114:374.0 115:692.0 116:5462.0 118:7768.0 119:799.0 120:369.0 122:31.0 124:21.0 128:576.0 129:344.0 134:294.0 136:120.0 144:695.0 145:80.0 154:3225.0 155:239.0 159:135.0 160:5100.0 161:616.0 162:349.0 169:571.0 186:113.0 189:530.0 190:26.0 226:37.0 227:29.0 230:64.0 238:33.0 240:23.0 241:40.…				0.85	0.5	6470	8433	6482	6397	2283	2052	1840	5939	4850	8137	4925	6281	9045	6012	5083	5050	4774	7323	6259	6096	4747	4160	2165	924	688	7196	9093	5525	3654	7109	425	4908	8150	10250	10707	7754	9784	3134	8723	2363
346242	217106	85	346242	85:102373.0 88:2834.0 94:680.0 95:1004.0 96:602.0 97:473.0 98:6389.0 99:9283.0 101:849.0 105:429.0 108:164.0 110:270.0 111:961.0 112:5441.0 113:11890.0 117:25997.0 118:2547.0 125:355.0 126:2473.0 127:8735.0 128:2204.0 135:947.0 138:102.0 140:452.0 145:408.0 147:32191.0 148:5889.0 149:3411.0 150:240.0 151:1933.0 153:124.0 155:258.0 156:426.0 163:97.0 170:1690.0 171:157.0 184:183.0 190:2094.0 191:5…				0.13	0.08	14871	8990	21181	9064	14962	17751	12911	15110	7817	7608	7648	8822	10548	12060	7969	11795	4690	10100	13536	25013	13086	9745	6014	7874	10359	15456	9731	8535	5606	18694	6707	10141	16998	15404	731	14279	21241	36193	47720	8384
346241	326170	228	346241	86:1383.0 88:5484.0 89:15031.0 90:1776.0 91:1817.0 92:1183.0 93:254.0 94:688.0 96:113.0 100:3444.0 101:2956.0 102:397.0 103:7731.0 104:550.0 105:445.0 106:563.0 107:871.0 108:1656.0 110:49396.0 111:1516.0 113:487.0 114:716.0 115:1144.0 116:1785.0 117:8723.0 118:2092.0 119:1401.0 120:1147.0 121:877.0 123:554.0 127:1643.0 130:3146.0 131:3716.0 133:4170.0 134:11650.0 135:1320.0 136:8749.0 137:1349.0…				1	0.78	30179	19364	26142	22499	10528	22163	20933	21279	15398	13166	13425	25324	27488	15439	25167	17867	12912	23711	16757	22075	14219	16120	9685	25421	16089	21552	29971	21726	13323	25252	17467	15231	26103	33161	10275	30930	20048	19707	48809	18022
346222	220757	170	346222	85:6005.0 87:2454.0 94:4647.0 95:1607.0 96:9327.0 99:10181.0 100:6862.0 101:7381.0 102:5025.0 103:564.0 104:747.0 105:425.0 107:591.0 111:1782.0 112:4524.0 113:9305.0 114:4918.0 115:14643.0 116:3643.0 123:337.0 124:4434.0 125:3851.0 127:5972.0 128:12102.0 129:2762.0 132:942.0 136:209.0 137:326.0 139:543.0 140:9221.0 141:36571.0 142:19573.0 149:143.0 152:1080.0 154:23173.0 155:14364.0 156:10939.0 …				0.33	0.06	6663	5688	2885	5536	3952	5487	3045	5764	228	1773	2755	2979	3116	6595	3372	1913	1638	6801	4031	5648	2910	3610	2062	3865	2316	3408	2659	172	2688	5236	3782	4219	9113	9730	593	9818	1723	1369	567	2755
346167	209891	176	346167	87:2062.0 88:2341.0 89:749.0 90:141.0 99:207.0 101:1277.0 102:14670.0 103:2681.0 104:870.0 106:116.0 114:53.0 116:618.0 117:16650.0 118:2617.0 119:1318.0 131:2582.0 132:1982.0 133:4023.0 143:183.0 144:304.0 145:152.0 146:1946.0 147:32380.0 148:5686.0 149:2734.0 150:358.0 151:268.0 153:29.0 159:186.0 160:2625.0 161:660.0 162:480.0 164:91.0 165:95.0 166:100.0 173:36.0 176:8186.0 177:1359.0 178:670.…				0.34	0.05	6262	5942	7114	2508	3843	4263	5692	6183	4205	3987	5917	5989	8035	3098	7348	5868	1276	8749	6507	7193	5301	4800	3680	5845	2000	7499	8448	6539	555	8411	3757	4883	2652	11592	781	8345	6341	3959	9749	3386
345861	536924	272	345861	87:380.0 89:3783.0 90:230.0 99:342.0 100:1862.0 102:198.0 104:96.0 112:711.0 114:179.0 117:382.0 119:385.0 126:305.0 127:483.0 128:116.0 129:286.0 133:406.0 139:82.0 140:330.0 153:85.0 154:173.0 155:655.0 156:388.0 157:137.0 164:98.0 169:178.0 170:229.0 175:74.0 182:256.0 183:193.0 184:519.0 185:597.0 186:46.0 191:191.0 192:523.0 201:9554.0 202:1205.0 203:673.0 213:247.0 219:243.0 227:111.0 228:4…				0	0.15	1226	426	3914	1219	94	414	1112	2325	101	463	756	305	664	651	680	926	235	281	301	546	237	298	540	813	544	322	1041	376	1189	479	1895	158	1205	403	232	222	172	86	271	348
345266	188847	156	345266	86:1034.0 96:555.0 97:497.0 98:712.0 99:1106.0 100:4803.0 101:466.0 102:461.0 113:43.0 114:338.0 115:3328.0 116:214.0 117:109.0 126:607.0 128:246.0 140:267.0 142:1646.0 143:202.0 156:18719.0 157:2399.0 158:601.0 160:425.0 170:472.0 171:4779.0 172:606.0 173:140.0 174:304.0				0.11	0.08	22666	15432	11069	14346	5072	16406	11288	10631	12080	4347	9566	8292	12164	12646	7195	9453	4642	15157	13465	15021	11037	10125	7134	5719	10967	19828	8854	516	3559	20029	10400	9118	14772	1874	516	15972	9871	3693	13418	8955
345144	570587	255	345144	87:890.0 90:201.0 92:1113.0 93:2113.0 94:240.0 95:1001.0 103:12813.0 104:1515.0 105:928.0 109:631.0 111:1355.0 118:336.0 119:2336.0 120:561.0 131:561.0 133:12739.0 134:1928.0 135:1515.0 136:253.0 137:338.0 138:89.0 143:1404.0 147:11142.0 148:2004.0 149:1944.0 150:268.0 151:686.0 153:1110.0 154:624.0 155:1770.0 157:1158.0 159:459.0 166:206.0 167:1210.0 168:1069.0 169:1165.0 171:483.0 177:214.0 179…				0.15	0	720	841	809	762	359	356	612	999	329	129	287	584	926	660	847	505	384	525	331	278	306	334	203	219	260	679	1053	400	256	577	1040	758	753	198	348	999	540	73	104	253
345139	443290	257	345139	87:185.0 90:106.0 91:587.0 92:195.0 93:858.0 95:168.0 97:483.0 98:837.0 99:510.0 100:840.0 105:272.0 109:46.0 111:760.0 113:637.0 119:303.0 125:176.0 128:254.0 129:272.0 131:844.0 133:2181.0 139:152.0 141:163.0 143:726.0 147:8005.0 148:1188.0 149:1067.0 150:94.0 154:167.0 155:380.0 156:500.0 167:2129.0 168:484.0 169:457.0 171:202.0 175:114.0 181:220.0 182:236.0 184:110.0 185:265.0 199:68.0 205:71…				0.32	0.05	1482	1883	1104	910	426	434	916	807	308	268	472	173	1241	928	960	483	618	674	727	149	423	435	275	356	306	1056	1514	377	253	886	983	780	1511	626	619	2005	782	130	385	297
344954	191544	156	344954	85:3597.0 86:7339.0 87:809.0 92:144.0 94:406.0 96:2622.0 97:1991.0 98:5684.0 99:6189.0 100:30755.0 101:3695.0 102:2228.0 110:882.0 112:4365.0 114:3032.0 115:18101.0 116:1501.0 117:789.0 124:254.0 126:3959.0 128:5646.0 129:829.0 140:2158.0 141:510.0 142:8927.0 143:1629.0 156:87080.0 157:12105.0 158:3663.0 159:282.0 170:1712.0 171:21228.0 172:3163.0 173:597.0 174:420.0 207:298.0 463:31.0				0.71	0.6	21824	2746	6576	13203	5139	16019	11288	10632	10608	4347	9620	8295	12164	9497	6420	9453	4500	15158	13724	14632	10693	10123	6962	5724	10976	18715	15291	11028	2420	20236	10001	8894	14773	26165	516	15638	10345	3693	11049	8962
344945	191668	160	344945	85:3665.0 86:5756.0 87:2084.0 88:409.0 89:401.0 99:1486.0 100:7313.0 101:1627.0 102:1110.0 103:286.0 105:1096.0 111:4837.0 113:19970.0 114:3741.0 115:2737.0 116:1913.0 117:3283.0 118:522.0 119:278.0 125:1160.0 128:3327.0 129:1098.0 131:6294.0 132:8633.0 133:3667.0 136:56.0 144:379.0 145:209.0 147:49852.0 148:5894.0 149:3851.0 150:346.0 159:179.0 160:28594.0 161:4355.0 162:2025.0 166:81.0 167:50.0…				0.16	0.08	10330	2506	3455	10631	5434	4515	3764	8492	7863	1076	6824	2445	8344	9707	5176	3840	1377	15627	7772	9411	3603	7235	7160	2891	1869	6045	4155	4113	1945	9926	9778	9423	8161	17655	90	4049	3403	614	7775	2646
344754	378344	198	344754	86:291.0 88:254.0 89:922.0 95:148.0 96:243.0 99:1735.0 100:1402.0 102:298.0 110:665.0 112:56.0 115:218.0 123:81.0 124:88.0 126:327.0 127:416.0 134:1205.0 139:83.0 141:158.0 142:155.0 144:248.0 151:99.0 152:168.0 153:197.0 163:82.0 166:89.0 167:58.0 170:4499.0 171:706.0 172:270.0 179:142.0 180:79.0 183:73.0 184:564.0 196:49.0 198:7035.0 199:698.0 200:415.0 210:76.0 213:126.0 214:175.0 224:49.0 228…				0.16	0.03	1673	3323	1622	1407	721	1534	1350	1514	715	1129	435	2882	1678	2464	2192	561	844	1420	903	638	954	481	296	2914	853	1078	1911	1065	1918	937	1396	522	2245	1968	1364	3854	973	564	2190	898
344049	318228	172	344049	89:242.0 106:601.0 112:241.0 138:58.0 139:52.0 141:20.0 144:319.0 146:192.0 160:72.0 164:6.0 172:3667.0 173:119.0 174:118.0 176:4.0 179:10.0 183:12.0 186:150.0 187:7.0 253:2.0 260:102.0 275:352.0 282:28.0 283:4.0				0.61	0.24	5754	9585	5012	5200	3171	7848	3291	6367	3770	5357	5366	5300	6305	5833	5821	4053	2234	7562	5485	5964	5591	5302	2632	7882	6452	6330	6924	5359	5077	7285	4005	3629	7459	7172	5286	8691	3071	2847	7514	5970
343238	551957	195	343238	86:188.0 91:251.0 95:270.0 97:627.0 98:491.0 100:1567.0 101:280.0 102:1973.0 110:2610.0 112:582.0 116:648.0 121:268.0 122:84.0 128:364.0 129:270.0 130:534.0 138:39.0 139:47.0 140:1306.0 141:198.0 142:248.0 151:156.0 152:1383.0 154:583.0 155:68.0 156:241.0 157:1418.0 158:533.0 159:84.0 160:69.0 162:5.0 165:239.0 166:72.0 168:78.0 169:58.0 171:29.0 172:155.0 176:25.0 179:65.0 180:32.0 181:17.0 183:…				0.13	0.09	647	594	573	612	293	559	522	471	415	305	356	2937	643	451	621	416	272	529	472	584	334	318	221	507	524	538	816	554	460	604	487	293	643	246	223	489	338	219	519	247
342936	180341	159	342936	85:2758.0 87:984.0 93:237.0 95:2013.0 99:2796.0 100:4019.0 101:4124.0 109:562.0 111:15412.0 114:2006.0 115:4109.0 117:1861.0 128:12343.0 129:1633.0 130:862.0 131:40208.0 132:4401.0 138:156.0 139:193.0 142:1788.0 143:10224.0 144:3114.0 145:471.0 154:1335.0 156:639.0 158:1703.0 159:16325.0 160:3051.0 161:775.0 170:160.0 172:16166.0 173:2071.0 174:794.0 202:34.0 213:447.0 215:26.0 222:39.0 241:99.0 …				0.05	0.15	5496	0	2321	9354	15738	0	10227	30429	0	0	0	0	3349	7632	3020	0	7160	16628	0	0	0	0	0	0	0	2828	3296	0	0	20788	2275	5009	9745	0	832	2710	1157	0	0	0
342924	578352	173	342924	85:815.0 86:1662.0 87:667.0 88:374.0 89:862.0 90:3330.0 94:79.0 97:1021.0 98:1324.0 99:839.0 100:7057.0 101:1579.0 102:1514.0 103:1497.0 104:248.0 105:400.0 112:1204.0 113:1190.0 114:2240.0 115:1801.0 116:2908.0 117:1278.0 118:154.0 122:56.0 124:106.0 128:4881.0 130:1183.0 131:5857.0 132:1891.0 133:3468.0 135:487.0 139:2111.0 140:3201.0 141:510.0 142:593.0 143:296.0 144:886.0 145:1986.0 146:332.0…				0.01	0.86	1172	2661	1115	671	986	1267	639	1268	761	707	866	2142	347	2052	515	322	335	642	898	933	849	1598	667	1008	1016	854	1238	580	2075	1060	3106	703	3649	1891	429	3598	243	358	2342	702
342738	894408	202	342738	86:402.0 89:959.0 90:251.0 92:177.0 95:108.0 98:136.0 100:201.0 101:837.0 102:1215.0 103:2167.0 104:285.0 105:314.0 109:185.0 115:429.0 116:298.0 117:1570.0 118:336.0 128:420.0 129:1442.0 130:1632.0 131:364.0 133:2246.0 134:282.0 140:132.0 142:76.0 143:560.0 144:240.0 145:746.0 146:201.0 147:4483.0 148:560.0 154:147.0 156:207.0 157:498.0 158:109.0 159:110.0 160:88.0 162:47.0 166:34.0 169:203.0 17…				0.01	0.14	302	353	280	296	244	360	359	244	338	265	431	110	324	550	540	229	94	293	462	231	463	293	198	317	276	258	335	278	332	350	265	180	1960	356	344	314	177	59	479	393
342716	795117	406	342716	85:511.0 87:674.0 88:190.0 89:1503.0 90:149.0 92:145.0 93:225.0 94:397.0 95:86.0 98:257.0 101:1584.0 102:691.0 103:7080.0 104:61.0 105:477.0 106:412.0 108:189.0 111:185.0 112:224.0 113:486.0 114:481.0 115:1687.0 116:73.0 117:5152.0 118:668.0 119:477.0 120:255.0 122:226.0 123:36.0 125:99.0 126:80.0 128:63.0 129:2065.0 130:1301.0 131:1536.0 133:1795.0 134:340.0 135:724.0 140:412.0 141:274.0 142:214…				0.15	0	1550	154	522	785	267	571	1045	422	340	787	220	220	1764	1365	882	304	228	357	452	352	322	513	141	659	428	494	331	385	610	549	640	275	534	289	190	184	2536	407	515	661
342598	183238	172	342598	86:2360.0 94:144.0 95:6011.0 96:1188.0 98:2916.0 99:1849.0 100:3501.0 101:3433.0 108:132.0 109:1093.0 110:3517.0 111:37122.0 112:4961.0 113:227.0 114:1965.0 115:1425.0 116:1804.0 125:4476.0 128:10015.0 129:1223.0 131:40888.0 132:5238.0 142:1562.0 143:9679.0 144:2722.0 145:691.0 154:6158.0 155:753.0 158:2957.0 159:15414.0 160:4075.0 161:929.0 172:16700.0 173:2086.0 174:1487.0 175:106.0 184:1156.0 …				0.16	0.55	5925	5058	6287	10827	15624	1314	4996	29434	0	799	3356	5163	2970	6748	4735	2102	4487	6528	6266	5347	629	4172	1583	1262	782	7248	2305	2714	557	29659	2641	6406	7340	7819	512	4009	6492	523	8037	0
342512	390444	228	342512	85:983.0 97:355.0 101:652.0 108:56.0 110:1530.0 113:511.0 115:767.0 116:340.0 118:60.0 126:255.0 127:174.0 129:104.0 130:94.0 131:2031.0 132:272.0 133:339.0 134:391.0 136:734.0 139:105.0 142:340.0 145:224.0 147:2934.0 148:457.0 149:169.0 151:253.0 154:82.0 155:76.0 169:25.0 181:41.0 182:20.0 184:229.0 185:107.0 195:96.0 197:34.0 199:26.0 212:14.0 217:182.0 221:776.0 222:173.0 223:151.0 225:83.0 2…				0.28	0.1	1867	1707	1499	563	697	1613	1325	1211	2806	986	2513	1284	1355	639	1525	1043	868	1532	3434	3950	1133	2719	1577	1507	1314	1751	2189	1359	924	1841	1220	927	1688	6282	836	1885	574	493	5363	1340
342320	519508	228	342320	88:461.0 91:332.0 92:144.0 94:238.0 95:328.0 96:1802.0 97:501.0 98:289.0 105:147.0 107:171.0 109:244.0 110:8024.0 111:478.0 113:380.0 114:553.0 121:118.0 122:24.0 124:730.0 125:81.0 126:470.0 129:1963.0 130:1121.0 132:219.0 133:149.0 134:7466.0 135:745.0 136:815.0 137:315.0 138:127.0 139:57.0 141:96.0 142:101.0 143:277.0 148:609.0 151:131.0 153:46.0 154:39.0 156:7616.0 157:3923.0 158:693.0 159:91…				0.99	0.54	1831	1983	1481	1729	779	1641	771	1465	750	1078	1082	2024	2026	1103	1444	869	886	1849	1404	1655	1192	1130	674	1601	1316	1485	2003	1497	1028	2196	1404	1032	1674	2284	312	1676	1360	622	1377	1300
342183	1167063	361	342183	89:1011.0 100:214.0 102:200.0 103:5294.0 104:564.0 105:598.0 109:91.0 111:88.0 113:207.0 115:255.0 117:2015.0 118:199.0 129:3260.0 130:304.0 131:571.0 133:1198.0 142:183.0 143:536.0 144:104.0 145:145.0 147:6115.0 148:785.0 149:524.0 153:86.0 155:496.0 156:143.0 157:503.0 158:135.0 159:89.0 160:2243.0 161:378.0 163:128.0 166:47.0 168:71.0 169:2202.0 170:296.0 171:107.0 173:151.0 177:157.0 182:52.0…				0.28	0	687	272	593	177	128	194	346	214	155	102	418	156	240	363	806	416	152	67	232	182	99	93	106	213	194	206	182	103	124	224	381	366	402	184	206	221	5259	221	99	110
342074	200987	85	342074	85:75609.0 86:3020.0 91:3987.0 93:2397.0 94:552.0 95:8202.0 96:2685.0 102:3190.0 106:426.0 107:360.0 108:404.0 109:2763.0 111:3404.0 123:46.0 136:3308.0 137:391.0 139:370.0 144:10353.0 150:1494.0 151:718.0 154:6309.0 155:565.0 172:2200.0 187:180.0 234:74.0 248:29.0 286:21.0 343:28.0 344:24.0 348:16.0 351:18.0 390:27.0 409:22.0 424:28.0 469:14.0 499:23.0				0.18	0.2	75216	53653	35591	52471	21110	59344	34451	30736	25737	12261	31975	24638	37833	44779	23138	20400	14428	56396	44131	38284	36288	33320	13514	21741	37334	56051	37360	32179	11392	67462	34443	33095	57546	84407	1177	59895	31280	10805	38802	25718
341973	460508	262	341973	85:2896.0 86:230.0 87:576.0 89:16409.0 90:545.0 91:1985.0 100:6369.0 101:162.0 102:2171.0 103:1270.0 105:600.0 112:51.0 114:981.0 115:1791.0 116:7821.0 117:2101.0 119:1216.0 123:60.0 126:349.0 128:425.0 130:7528.0 131:2606.0 132:686.0 133:5169.0 134:972.0 135:1316.0 138:81.0 140:96.0 142:351.0 143:419.0 144:4811.0 145:658.0 146:623.0 147:11161.0 148:1858.0 149:1521.0 156:2059.0 157:237.0 159:612.…				0.62	0.83	585	1370	179	859	498	407	644	737	208	285	384	263	986	846	913	186	474	921	718	1882	199	601	345	835	817	682	655	979	497	591	660	257	1437	536	303	1029	200	386	779	670
341917	223569	170	341917	86:8131.0 88:5173.0 90:1698.0 95:1071.0 96:6827.0 99:756.0 100:5768.0 101:3224.0 102:3205.0 106:2722.0 107:3465.0 108:4233.0 110:1521.0 111:773.0 112:2893.0 113:2993.0 114:1506.0 115:3512.0 117:1792.0 119:843.0 123:482.0 124:3112.0 125:1060.0 126:8489.0 127:18088.0 128:4101.0 129:1365.0 130:39446.0 131:9549.0 134:56151.0 135:3726.0 136:2774.0 139:414.0 140:4515.0 141:12972.0 142:6047.0 143:3575.0…				0.13	0.01	6663	5688	2885	6285	3952	5487	3045	5763	3242	1773	2755	2979	3116	6812	3372	1913	1638	6939	4587	5926	1228	3608	2124	3865	2316	3712	2659	2540	2688	5750	3004	4327	9114	9730	593	9792	2431	1369	5665	2755
341900	245723	188	341900	85:23745.0 86:6090.0 87:1983.0 89:1142.0 91:267.0 97:793.0 98:2295.0 99:2230.0 102:3326.0 107:1064.0 111:156.0 112:1707.0 113:3540.0 119:824.0 121:104.0 123:158.0 126:910.0 127:4447.0 130:3261.0 131:4932.0 141:175.0 144:10261.0 145:1340.0 146:5040.0 147:50617.0 148:6922.0 149:3497.0 150:573.0 151:84.0 155:142.0 156:134.0 158:87.0 160:203.0 170:206.0 188:11379.0 189:1571.0 198:40.0 203:1184.0 204:…				0.84	0.43	33837	38726	25882	28983	13899	35581	24147	25473	21287	19868	21323	30364	30917	24537	27196	18908	16574	32729	27435	30756	22219	21691	13626	28370	23971	32366	29179	23368	18436	38174	25714	18931	33823	44336	23323	40260	21292	14544	38536	25527
334150	429764	228	334150	85:855.0 86:769.0 88:797.0 89:205.0 91:119.0 97:126.0 99:1113.0 100:1069.0 101:2453.0 102:415.0 103:1092.0 104:185.0 107:359.0 108:355.0 110:7972.0 112:162.0 113:196.0 115:131.0 116:2593.0 117:781.0 121:62.0 128:176.0 129:306.0 131:919.0 133:1242.0 134:2536.0 135:262.0 136:1554.0 137:275.0 139:76.0 143:3812.0 144:434.0 145:1086.0 153:121.0 158:114.0 159:94.0 162:84.0 164:106.0 166:307.0 167:76.0 …				0	0.29	287	189	316	204	94	290	324	195	112	206	97	359	396	195	340	246	190	207	119	230	151	148	75	283	260	208	470	288	176	170	252	133	194	415	166	292	149	92	361	181
330286	748996	204	330286	85:7442.0 86:2597.0 88:2276.0 89:16320.0 90:1608.0 91:2016.0 92:336.0 93:431.0 94:416.0 95:579.0 96:546.0 97:3083.0 98:1576.0 99:6045.0 100:4142.0 101:26386.0 102:4863.0 103:76545.0 104:6909.0 105:5176.0 106:848.0 108:433.0 109:2789.0 110:584.0 111:4877.0 112:890.0 113:7147.0 114:3112.0 115:8813.0 116:15763.0 117:44983.0 118:5222.0 119:12071.0 120:1465.0 121:973.0 122:132.0 123:208.0 124:412.0 12…				0.53	0.04	5044	1333	2297	1239	866	1191	1291	1738	749	1444	403	895	878	1861	836	1302	610	866	779	2495	624	877	313	1062	854	1576	912	1273	870	922	370	2396	1582	837	556	2648	5847	63840	4408	888
329765	951584	174	329765	85:2594.0 86:60653.0 88:810.0 89:1650.0 92:1035.0 94:2694.0 95:625.0 98:1542.0 99:3556.0 100:35598.0 101:5173.0 102:7553.0 103:3181.0 104:1439.0 109:644.0 110:1744.0 111:322.0 112:2929.0 113:3598.0 114:4429.0 115:2970.0 116:5275.0 117:5835.0 118:1460.0 119:2178.0 120:929.0 121:2306.0 122:529.0 123:395.0 124:1267.0 125:734.0 126:1823.0 128:1347.0 130:36027.0 131:11030.0 132:6549.0 133:12201.0 134:…				0	0.96	3128	4829	2258	2271	1677	1447	2609	1858	2601	1699	2637	1037	1285	6387	1985	1352	1296	1646	3901	1061	1292	2548	1374	2358	1920	1079	857	2580	3762	2273	1596	1542	631	1152	1524	2654	5674	326	2765	2043
329435	799351	160	329435	85:876.0 87:1053.0 88:714.0 89:7088.0 90:350.0 93:539.0 94:590.0 95:1103.0 96:1581.0 97:1128.0 98:24015.0 99:2937.0 100:1582.0 101:1933.0 102:1174.0 103:29849.0 104:3086.0 105:863.0 107:501.0 109:426.0 110:403.0 111:624.0 112:643.0 113:677.0 114:909.0 115:500.0 116:1486.0 117:10690.0 118:1232.0 119:1178.0 121:302.0 122:312.0 123:265.0 124:319.0 125:1206.0 126:670.0 128:1164.0 129:6828.0 130:1592.…				0	0.18	462	341	299	319	142	116	201	165	222	188	150	364	629	575	181	128	106	177	214	203	184	196	120	316	165	273	362	353	171	215	217	247	495	244	127	180	459	64	960	116
329369	903861	173	329369	91:482.0 95:348.0 99:284.0 103:3223.0 104:166.0 105:338.0 110:181.0 116:462.0 129:596.0 131:435.0 133:797.0 135:311.0 142:217.0 147:4955.0 156:142.0 158:110.0 162:80.0 167:103.0 173:11036.0 174:1228.0 175:270.0 179:91.0 186:54.0 191:176.0 204:1106.0 205:192.0 217:226.0 218:66.0 222:194.0 226:31.0 230:425.0 231:130.0 232:50.0 247:21.0 259:78.0 266:98.0 279:35.0 304:24.0 309:46.0 333:25.0 350:19.0 …				0.13	0	447	1178	202	944	1540	1812	276	1169	2839	1775	630	647	3667	585	1735	612	2103	683	2076	1149	2288	1836	910	1165	2896	1355	2436	1004	5250	2230	1218	792	3531	1019	842	1759	192	152	2742	1824
329363	911707	173	329363	86:272.0 91:686.0 93:804.0 94:144.0 95:1161.0 96:467.0 99:320.0 101:693.0 103:4128.0 107:600.0 110:255.0 111:171.0 116:469.0 117:613.0 118:299.0 120:114.0 121:210.0 123:68.0 129:1806.0 132:398.0 135:446.0 142:126.0 143:355.0 147:6979.0 148:762.0 149:445.0 150:186.0 151:169.0 152:200.0 155:684.0 157:317.0 159:167.0 162:71.0 166:83.0 167:99.0 169:106.0 173:10748.0 174:1508.0 175:327.0 179:112.0 185…				0.2	0	5604	1003	1618	1517	2677	1380	2224	1447	4535	1430	1591	1126	5261	1208	2441	1096	2868	867	2503	1147	3215	2075	1339	1414	3160	1496	1612	1355	6511	2517	2029	1030	4641	966	1069	1277	426	181	4725	1340
327384	917924	217	327384	85:10340.0 86:1064.0 87:4467.0 88:2216.0 89:12509.0 90:1301.0 91:1384.0 92:194.0 93:434.0 94:525.0 95:1341.0 97:3016.0 98:482.0 99:5749.0 100:638.0 101:16472.0 102:11500.0 103:86273.0 104:8293.0 105:5211.0 106:346.0 107:456.0 108:158.0 109:3469.0 110:511.0 111:5999.0 112:1008.0 113:15047.0 114:1811.0 115:5460.0 116:4232.0 117:30820.0 118:3340.0 119:4419.0 120:190.0 121:715.0 122:83.0 123:161.0 12…				0.15	0	108285	65158	75809	34487	42224	108212	100708	42827	75914	50667	44754	6360	92446	19535	102703	7761	53932	89131	87185	29843	66821	85794	45799	59764	77664	32116	46058	62218	108490	95505	52824	24724	135012	86752	25042	43081	867	2791	109435	104202
327350	620995	167	327350	85:45723.0 87:26617.0 88:7060.0 89:26335.0 90:2321.0 91:24334.0 92:9790.0 93:23244.0 94:16720.0 95:117362.0 96:64661.0 97:27790.0 98:14252.0 99:44561.0 101:133650.0 102:21424.0 103:129717.0 104:16314.0 105:60951.0 106:6673.0 107:6232.0 108:2136.0 109:12832.0 110:1835.0 111:52527.0 112:8580.0 113:33801.0 114:10042.0 115:34450.0 116:73449.0 117:105236.0 118:16289.0 119:41157.0 120:6100.0 121:8313.0…				0.2	0	15809	370	1833	2023	1191	785	2147	1920	1713	1330	2988	331	2407	953	1344	3090	1087	271	1026	2211	1700	1145	1240	1767	1542	1428	1929	3421	2012	3395	8711	9076	5915	368	1097	662	671	2205	8304	1270
326263	597093	243	326263	85:6446.0 86:3762.0 90:441.0 91:1914.0 95:631.0 97:461.0 98:2043.0 99:12036.0 100:83993.0 101:9636.0 102:5088.0 103:8578.0 104:2074.0 111:3067.0 113:863.0 115:3120.0 116:1211.0 119:1666.0 124:425.0 125:644.0 129:1065.0 130:2270.0 132:996.0 133:3939.0 135:971.0 137:455.0 139:561.0 141:3011.0 143:465.0 144:416.0 145:675.0 147:10689.0 148:2131.0 151:888.0 154:287.0 155:4673.0 156:1206.0 157:4893.0 1…				0.16	0.58	687	269	914	760	520	428	621	666	490	330	38	333	608	303	479	69	358	386	267	307	818	200	72	639	649	648	180	181	860	831	35	89	5482	368	173	512	942	225	2055	818
324429	778052	204	324429	85:3433.0 86:7905.0 87:4663.0 88:2527.0 89:3633.0 90:1670.0 99:4066.0 100:3513.0 101:25508.0 102:6690.0 103:182657.0 104:17369.0 105:5421.0 113:2466.0 114:2244.0 115:3841.0 116:15500.0 118:7286.0 119:5149.0 127:284.0 128:1316.0 129:48747.0 130:11529.0 131:20276.0 132:8462.0 133:33647.0 134:2572.0 139:2026.0 141:1829.0 142:542.0 143:9222.0 144:3668.0 147:119146.0 148:19911.0 149:14363.0 153:732.0 …				0.01	0.35	6844	3420	2531	6135	3268	1726	8283	4395	18882	8706	14606	2852	18401	11949	2049	14576	3102	1246	4948	5471	7490	7422	8925	6296	6408	4903	1377	6634	6994	14963	18015	3989	3043	1121	2237	1620	2332	9036	2565	1452
317264	509524	217	317264	85:296.0 89:889.0 95:467.0 98:1340.0 99:2017.0 103:8156.0 113:1072.0 114:140.0 115:1849.0 117:1178.0 119:407.0 120:133.0 123:199.0 125:230.0 127:830.0 129:6168.0 130:1012.0 132:331.0 133:2621.0 134:459.0 139:168.0 142:600.0 143:512.0 144:771.0 147:4289.0 148:2115.0 155:623.0 157:646.0 158:508.0 171:194.0 173:143.0 175:2006.0 177:463.0 185:408.0 187:354.0 189:604.0 199:58.0 210:78.0 213:497.0 215:…				0.15	0	1779	4580	1376	1299	659	1121	1035	1046	874	1287	986	1426	1371	1399	1206	1130	471	1122	13879	1488	844	20578	606	1444	941	1045	2039	1343	29909	1421	2869	1631	1308	1854	623	1337	2791	594	2324	945
317190	860251	435	317190	85:1357.0 86:720.0 87:682.0 89:9097.0 90:899.0 97:377.0 100:3438.0 101:2181.0 102:2391.0 103:18136.0 104:778.0 105:1849.0 106:244.0 113:241.0 114:6997.0 115:1093.0 117:2781.0 118:756.0 119:1801.0 122:267.0 123:243.0 129:5260.0 130:2547.0 133:12866.0 134:1683.0 135:202.0 140:393.0 142:1292.0 143:7508.0 147:42820.0 148:8946.0 149:5070.0 157:693.0 160:236.0 161:471.0 163:886.0 169:745.0 170:1109.0 1…				0.35	0	984	560	435	966	2011	292	2086	955	149	1695	614	808	774	4430	315	1086	341	819	124	570	852	558	255	1095	108	4172	217	1213	503	1411	1365	1660	101	1745	723	585	79	109	111	452
247669	992780	111	247669	85:722.0 91:536.0 93:196.0 95:734.0 96:365.0 97:850.0 98:605.0 99:340.0 109:190.0 111:750.0 112:265.0 113:153.0 114:51.0 116:116.0 117:566.0 122:21.0 123:168.0 129:664.0 131:233.0 132:191.0 135:53.0 137:53.0 138:92.0 139:197.0 142:26.0 143:323.0 145:409.0 146:76.0 149:207.0 150:39.0 153:33.0 154:85.0 156:93.0 157:116.0 158:51.0 159:258.0 168:23.0 169:66.0 170:90.0 171:93.0 172:81.0 173:98.0 185:1…				0.84	0.83	4339	3667	3522	2947	1647	2950	2483	2542	2454	2744	1826	4049	3269	2417	3277	2662	553	3218	3671	2952	1960	1904	1369	3225	3066	3055	2719	3920	2575	3953	2958	2265	3129	4256	1320	3904	3165	822	4400	1676
242849	1000779	131	242849	96:51.0 131:1336.0 349:39.0 458:25.0 462:26.0 484:19.0				0.38	0.2	3161	2776	2822	2216	1004	2571	2038	1039	1523	1977	1642	1325	2859	1501	2495	1656	1295	2143	2234	2186	2037	1533	902	2006	1802	2296	4130	2934	2067	3144	2452	1818	2824	1500	824	2063	2028	821	2702	4280
241684	998236	185	241684	85:409.0 89:122.0 91:260.0 93:39.0 95:426.0 97:380.0 98:394.0 99:345.0 101:128.0 103:131.0 104:59.0 109:272.0 111:786.0 112:216.0 113:130.0 116:104.0 117:445.0 119:61.0 121:66.0 123:123.0 125:144.0 126:95.0 129:453.0 130:90.0 132:367.0 133:164.0 136:22.0 137:124.0 139:54.0 140:55.0 142:51.0 143:86.0 145:103.0 148:1341.0 149:145.0 150:75.0 154:47.0 156:186.0 157:127.0 158:67.0 165:47.0 166:27.0 16…				0.71	0.69	2793	2704	1856	1722	1077	1890	1485	1582	1088	1483	1335	1847	1818	1818	1799	1120	881	2049	2281	1762	1388	1220	633	2038	915	1864	2841	2131	1623	2259	1257	1292	2430	2605	729	2590	1169	467	2936	1327
241681	936970	239	241681	85:236.0 91:155.0 94:39.0 95:417.0 96:170.0 97:371.0 98:350.0 99:114.0 100:78.0 107:65.0 109:203.0 110:50.0 111:381.0 112:181.0 113:145.0 114:82.0 116:101.0 117:343.0 123:154.0 125:48.0 129:472.0 130:83.0 131:66.0 132:167.0 136:50.0 137:63.0 138:96.0 139:170.0 140:39.0 142:33.0 143:229.0 145:288.0 146:63.0 148:217.0 151:36.0 154:45.0 156:36.0 157:131.0 159:177.0 169:72.0 170:49.0 171:78.0 172:100…				0.3	0.5	2458	103	2080	1657	895	1944	1293	96	1399	1331	1237	88	2117	1358	1784	1338	799	1877	2019	97	1445	1241	769	2014	1438	1774	2813	2046	1546	2293	1572	1192	2190	2607	875	2173	1057	536	186	1495
239312	756094	130	239312	85:156.0 88:94.0 89:105.0 92:25.0 98:63.0 99:66.0 111:53.0 115:45.0 118:66.0 119:22.0 130:1474.0 131:220.0 134:31.0 143:67.0 144:96.0 156:84.0 159:28.0 169:51.0 172:113.0 180:42.0 183:12.0 185:47.0 186:30.0 187:45.0 188:33.0 190:22.0 203:11.0 205:28.0 216:71.0 218:32.0 230:32.0 231:15.0 232:26.0 245:17.0 259:37.0 347:24.0 360:30.0 362:20.0				0.27	0	649	364	2996	844	1274	421	468	605	6820	1054	1829	1756	336	1232	252	1957	490	182	213	4063	447	434	255	1474	932	2009	2443	3485	2473	1377	543	933	1743	612	2124	484	2619	2130	5535	243
237707	275557	152	237707	87:118.0 116:39.0 117:1141.0 122:20.0 128:37.0 150:72.0 152:584.0 153:49.0 156:183.0 167:109.0 171:64.0 293:20.0 300:15.0 343:15.0 353:35.0 365:14.0 437:16.0 442:14.0 464:18.0 493:23.0				0.24	0.34	39152	46020	48228	40129	23916	37940	34899	40460	32285	29332	26505	45034	47721	33787	43574	32454	24788	38691	41199	38094	33243	29235	16901	47040	38768	30983	53661	51277	37111	48381	31014	27291	62202	49631	23103	39793	23487	17222	47863	35189
231706	506322	173	231706	88:13.0 95:58.0 100:135.0 101:114.0 103:252.0 115:309.0 132:366.0 133:356.0 157:113.0 169:12.0 173:907.0 174:141.0 175:243.0 176:38.0 188:23.0 189:542.0 190:251.0 191:67.0 221:281.0 245:45.0 246:70.0 249:12.0 263:285.0 265:44.0 275:12.0 321:23.0 330:47.0 332:13.0 397:11.0 416:17.0				0	0.18	3710	3430	2512	2812	2330	1445	990	6614	3453	1066	952	875	1396	2262	1698	926	1055	1730	10650	968	1809	14419	1336	2449	3682	1247	943	1894	20924	2506	1626	819	3262	1222	754	1358	2800	304	957	3964
231187	275384	107	231187	107:1191.0 129:144.0 132:73.0 154:30.0 156:243.0 164:24.0 170:35.0 184:123.0 199:57.0 226:34.0 241:47.0 291:18.0 337:22.0 372:20.0 450:13.0 458:16.0 473:14.0 487:19.0 490:17.0				0.15	0	352	2657	759	2238	849	292	412	993	808	768	286	271	633	182	299	426	1059	618	364	1491	759	582	391	1949	1282	343	205	427	566	333	1020	795	2257	2065	548	212	444	6596	766	1751
231137	296516	116	231137	90:34.0 93:429.0 94:73.0 95:186.0 101:1243.0 102:192.0 114:77.0 115:95.0 116:1168.0 117:261.0 118:37.0 121:38.0 123:32.0 131:220.0 133:84.0 135:43.0 139:27.0 142:35.0 147:1648.0 148:147.0 149:41.0 150:35.0 151:318.0 152:39.0 153:87.0 167:75.0 169:25.0 186:19.0 200:16.0 220:15.0 234:20.0 239:74.0 240:31.0 249:17.0 266:15.0 280:19.0 284:15.0 291:36.0 293:22.0 296:17.0 298:21.0 302:24.0 415:19.0 425…				0.15	0.26	6549	6048	10265	22504	8865	6840	21638	10887	14758	8798	12222	21169	8829	10228	33130	6175	10263	10458	33401	9034	6694	9620	14275	7906	6310	22743	15821	7467	10878	39283	30412	8852	59178	73609	11428	22411	6406	16738	16072	1543
230854	736420	217	230854	85:63.0 88:45.0 89:374.0 90:46.0 101:55.0 102:52.0 103:961.0 104:174.0 105:406.0 113:19.0 117:467.0 118:62.0 119:36.0 120:41.0 121:38.0 128:29.0 129:427.0 130:156.0 131:49.0 133:328.0 140:18.0 142:91.0 143:83.0 144:49.0 145:68.0 147:923.0 148:247.0 149:74.0 150:62.0 153:20.0 155:29.0 157:98.0 160:575.0 161:138.0 162:25.0 163:39.0 164:29.0 168:30.0 170:37.0 172:37.0 175:44.0 176:31.0 183:16.0 189:…				0.08	0.69	2526	557	1819	948	1195	485	1654	978	838	447	566	10539	730	41891	237	781	226	382	429	367	11750	515	385	747	499	194	309	919	789	649	1144	861	2076	282	262	361	2315	11108	1265	606
228840	402558	157	228840	86:65.0 87:91.0 97:20.0 102:20.0 103:996.0 104:80.0 107:38.0 112:33.0 113:726.0 114:107.0 117:127.0 123:32.0 127:60.0 130:267.0 139:1058.0 140:182.0 141:64.0 146:164.0 157:1819.0 158:245.0 159:25.0 160:55.0 167:265.0 168:30.0 174:14.0 185:278.0 213:13.0 261:16.0 294:24.0 342:22.0 345:19.0 352:21.0 357:24.0 362:23.0 366:11.0 432:24.0 435:20.0 448:24.0 450:32.0 452:13.0 456:22.0 458:26.0 465:30.0 4…				0	0.53	2745	4460	3767	2647	1308	4114	4718	1748	1855	5015	979	4486	6945	151	5816	3129	5241	3273	1136	2660	2880	1207	913	5981	4654	686	3437	6047	7913	2266	1247	1724	1139	4780	1740	786	86	582	4756	5355
228818	757533	174	228818	85:310.0 86:5087.0 87:529.0 88:221.0 89:1197.0 90:139.0 93:38.0 94:56.0 95:37.0 98:48.0 99:93.0 100:2987.0 101:644.0 102:607.0 103:5571.0 104:483.0 105:207.0 111:79.0 113:65.0 114:69.0 115:142.0 116:145.0 117:1970.0 118:175.0 119:171.0 120:73.0 121:35.0 125:40.0 126:43.0 127:47.0 129:649.0 130:478.0 131:581.0 132:177.0 133:1118.0 134:98.0 135:49.0 141:56.0 142:408.0 143:157.0 146:36.0 147:4798.0 …				0.46	0	3342	2457	3995	4067	2027	4961	3624	6483	10983	3872	6328	3696	3505	1500	3708	18038	554	1238	1974	7779	803	2591	4360	19491	10411	2103	1563	37979	29403	8368	6444	22041	16322	2173	980	4789	499	898	16814	814
228306	880054	144	228306	100:195.0 102:166.0 104:43.0 105:102.0 110:54.0 111:121.0 114:223.0 115:54.0 125:21.0 131:73.0 136:35.0 139:25.0 144:2327.0 145:414.0 146:196.0 150:138.0 153:18.0 174:179.0 179:198.0 180:30.0 193:85.0 232:61.0 236:19.0 241:18.0 248:20.0 250:27.0 260:23.0 268:61.0 275:38.0 286:25.0 287:21.0 293:18.0 308:9.0 357:34.0 363:13.0 364:11.0 436:27.0 478:23.0 482:26.0 484:28.0				0.15	0	2389	2427	1368	1996	881	1141	1058	527	1192	567	1439	220	911	4802	905	346	241	617	4793	618	377	1457	444	444	1715	1113	1628	836	1634	1311	921	621	2196	250	1806	2975	915	1252	1805	903
228119	467113	191	228119	87:223.0 95:79.0 99:89.0 101:241.0 103:2089.0 104:197.0 112:47.0 113:449.0 115:146.0 119:188.0 129:436.0 130:169.0 131:797.0 133:1263.0 134:237.0 135:143.0 136:48.0 139:68.0 141:159.0 142:340.0 143:705.0 144:123.0 145:74.0 147:7552.0 148:1022.0 149:1050.0 150:151.0 154:252.0 155:1527.0 156:300.0 157:211.0 158:56.0 159:48.0 161:59.0 163:118.0 165:21.0 170:90.0 173:23.0 177:195.0 184:104.0 187:59.0…				0.04	0.16	2146	7103	1106	773	1041	1129	1535	853	501	1188	412	1635	699	1655	588	1107	0	1105	592	1071	578	512	298	826	610	1589	728	1361	726	911	1277	1371	2381	2707	364	1457	424	339	401	1343
228052	567229	175	228052	87:673.0 91:112.0 93:156.0 97:231.0 99:143.0 101:687.0 102:171.0 105:453.0 110:289.0 111:249.0 119:206.0 121:97.0 124:32.0 131:1158.0 133:622.0 138:103.0 139:85.0 143:109.0 147:2804.0 148:632.0 175:14093.0 176:1855.0 177:1141.0 178:167.0 179:47.0 211:160.0 257:47.0 261:24.0 285:343.0 292:509.0 293:143.0 294:85.0 295:54.0 297:56.0 299:221.0 367:23.0 382:56.0				0.01	0.39	641	719	585	1536	430	1073	288	891	1304	837	1153	430	144	424	1028	303	688	779	1172	502	870	294	1090	431	1433	1439	426	1050	1183	1634	856	573	3520	166	465	198	542	289	356	1501
227939	398391	191	227939	86:247.0 89:558.0 99:67.0 100:944.0 101:699.0 103:11240.0 104:1290.0 105:547.0 106:123.0 112:114.0 113:196.0 115:568.0 116:347.0 117:4373.0 118:824.0 119:1950.0 120:271.0 121:48.0 130:752.0 131:696.0 132:497.0 133:3196.0 134:284.0 135:277.0 136:29.0 139:27.0 143:137.0 144:38.0 147:8748.0 148:706.0 149:1102.0 158:231.0 159:220.0 160:115.0 161:265.0 171:147.0 173:111.0 174:204.0 176:22.0 177:252.0 …				0.18	0.24	3556	307	3441	2474	131	3575	2686	2533	1804	2966	1755	345	4335	2363	3746	2430	1648	3209	2250	361	2364	1827	1257	3753	2616	3799	4944	3093	2519	3627	1151	1144	2652	346	3171	350	2043	1948	253	2728
227176	441010	158	227176	85:879.0 86:1361.0 87:195.0 88:98.0 90:113.0 91:307.0 93:89.0 95:218.0 96:105.0 97:84.0 99:265.0 100:418.0 101:931.0 102:589.0 104:75.0 105:246.0 106:135.0 107:112.0 111:73.0 112:16.0 113:129.0 114:182.0 115:1001.0 116:685.0 117:8331.0 118:978.0 119:584.0 120:69.0 123:33.0 128:692.0 129:335.0 130:771.0 131:715.0 132:213.0 133:1461.0 134:380.0 143:342.0 144:24.0 145:22.0 147:6084.0 148:870.0 149:1…				0.42	0	5148	4715	3816	4017	6458	4710	4513	3856	10243	3569	3104	5649	5439	2425	6642	6352	4399	5073	4119	3158	13890	5739	5929	13356	6962	3238	4998	9682	2613	5503	2556	2944	3476	5351	3640	8373	1560	1409	6415	3697
225006	627520	290	225006	85:1820.0 86:2736.0 87:1410.0 88:1235.0 89:13531.0 90:1440.0 91:900.0 92:250.0 93:325.0 94:536.0 95:193.0 96:1029.0 97:307.0 98:2676.0 99:2161.0 100:5931.0 101:8461.0 102:2341.0 103:21548.0 104:2293.0 105:2097.0 106:577.0 107:630.0 108:64.0 109:171.0 110:911.0 111:2103.0 112:31809.0 113:3425.0 114:1555.0 115:2927.0 116:3616.0 117:9327.0 118:960.0 119:1772.0 122:83.0 123:55.0 124:221.0 125:139.0 1…				0.25	0.01	1671	825	2341	2450	422	1182	1105	893	1702	1032	456	2298	749	3702	1726	795	1001	1142	872	1187	444	697	582	1005	1310	6391	1184	713	902	778	867	710	1262	2396	5007	874	3160	395	1053	1878
224117	913299	217	224117	85:475.0 86:597.0 87:964.0 88:352.0 89:2156.0 90:363.0 91:256.0 92:54.0 93:402.0 94:258.0 95:725.0 96:1201.0 97:993.0 98:1063.0 99:873.0 100:813.0 101:1394.0 102:810.0 103:6360.0 104:745.0 105:546.0 106:270.0 107:332.0 108:150.0 109:426.0 110:384.0 111:407.0 112:430.0 113:456.0 114:567.0 115:852.0 116:2082.0 117:6084.0 118:669.0 119:758.0 121:279.0 122:178.0 123:351.0 124:139.0 125:274.0 126:605.…				0.46	0.23	5217	3370	697	3272	1971	3052	508	683	2326	1083	4148	4032	3599	3376	988	3188	2815	873	2664	831	457	838	1329	628	3079	215	46058	62218	3352	2193	4462	2268	7598	3468	715	1354	632	140	3781	1726
224103	814856	204	224103	85:375.0 86:5410.0 87:1345.0 88:508.0 89:762.0 90:99.0 91:473.0 92:81.0 93:77.0 94:87.0 96:177.0 100:809.0 103:4007.0 104:414.0 105:282.0 106:121.0 107:91.0 109:816.0 110:146.0 112:188.0 113:337.0 114:114.0 115:590.0 116:279.0 117:1234.0 118:232.0 119:156.0 120:61.0 122:42.0 123:38.0 124:151.0 126:179.0 128:456.0 129:1104.0 130:401.0 131:416.0 132:155.0 133:560.0 135:125.0 136:47.0 139:65.0 140:3…				0.24	0	4462	2535	2051	1460	2699	3752	3873	1554	3711	1235	1697	1332	3859	1406	3845	3210	2483	3591	2628	1042	4883	2872	2003	2680	2486	984	1461	2263	4584	2982	2366	1637	6550	3957	717	3027	1185	237	6918	2595
223196	355365	180	223196	94:68.0 101:91.0 106:1035.0 107:129.0 109:35.0 110:163.0 111:1424.0 116:1289.0 124:25.0 136:811.0 139:25.0 144:1397.0 145:24.0 159:206.0 160:59.0 180:1614.0 186:169.0 187:11.0 201:397.0 202:137.0 203:88.0 204:1400.0 205:116.0 206:104.0 233:99.0 272:25.0 273:41.0 289:26.0 290:17.0 366:17.0				0.22	0.13	2651	2289	2356	2015	1106	2290	1835	2002	1467	1686	1296	2611	2450	1767	1964	1413	1028	2636	2219	1954	1519	1427	810	2253	1822	1925	3015	2124	1729	2484	2351	1473	3746	3726	1405	1803	1187	1186	2903	1662
223195	735302	238	223195	85:900.0 86:648.0 87:374.0 88:281.0 89:211.0 90:147.0 91:51.0 92:53.0 93:92.0 94:243.0 95:161.0 96:734.0 97:183.0 98:500.0 99:483.0 100:1213.0 101:207.0 102:587.0 103:130.0 105:126.0 108:40.0 109:25.0 110:189.0 111:132.0 112:125.0 113:347.0 114:210.0 115:428.0 116:970.0 117:497.0 119:149.0 120:35.0 121:139.0 122:44.0 123:125.0 124:570.0 125:119.0 126:551.0 127:292.0 128:897.0 129:478.0 130:255.0 …				0.24	0	780	1653	1447	190	718	2163	2377	1158	1637	1175	746	231	1566	993	319	890	1150	131	291	126	1129	170	359	363	1368	104	385	930	2054	1178	1206	312	2227	272	343	93	239	56	2343	65
223087	827536	117	223087	85:385.0 86:2223.0 87:847.0 88:514.0 89:4375.0 90:344.0 91:343.0 92:126.0 93:197.0 94:185.0 95:277.0 96:280.0 97:299.0 98:448.0 99:521.0 100:1340.0 101:1657.0 102:767.0 103:16840.0 104:1483.0 105:1009.0 106:136.0 107:278.0 108:154.0 109:157.0 110:80.0 111:104.0 112:177.0 113:475.0 114:560.0 115:555.0 116:790.0 117:21226.0 118:2217.0 119:1194.0 120:157.0 121:130.0 124:78.0 125:142.0 126:75.0 127:1…				0.03	0.58	7067	530	17683	716	2685	233	4973	813	1442	385	981	655	3719	601	3357	1038	505	441	629	1304	764	532	2297	2002	854	604	515	2144	4254	4044	3635	4071	1916	436	179	685	1597	164	377	310
219375	727350	313	219375	85:2700.0 86:2721.0 87:1806.0 88:1975.0 89:2702.0 90:461.0 92:595.0 93:703.0 94:2048.0 95:1905.0 96:1902.0 97:797.0 98:1894.0 99:2659.0 100:6735.0 101:6588.0 102:2243.0 103:21999.0 104:2155.0 105:1871.0 106:455.0 107:523.0 108:475.0 109:314.0 110:701.0 111:704.0 112:1219.0 113:2053.0 114:1824.0 115:2741.0 116:5324.0 117:3465.0 118:620.0 119:1581.0 120:793.0 121:478.0 122:312.0 123:297.0 124:1037.…				0.24	0	845	406	637	376	208	584	958	263	437	310	312	353	823	306	575	310	265	668	262	110	50	275	232	525	317	211	524	462	503	501	318	332	572	831	107	422	69	28	771	509
217691	269320	177	217691	107:188.0 125:94.0 129:246.0 138:67.0 140:150.0 143:80.0 151:260.0 177:1660.0 178:281.0 179:120.0 185:40.0 199:26.0 219:887.0 257:18.0 258:41.0 433:16.0 485:31.0 493:31.0 498:20.0				0.19	0.03	14186	8004	11395	12358	49292	7398	16798	3420	11112	6579	5520	11618	14037	17242	9071	16462	12878	8627	5868	57313	10400	2428	12643	18268	10475	9407	18945	14315	12444	15054	13174	13577	10299	12809	7370	8740	7969	2194	43213	5558
216692	736036	100	216692	85:230.0 87:53.0 88:89.0 89:134.0 90:100.0 92:50.0 98:11.0 99:81.0 100:1437.0 101:272.0 102:138.0 103:93.0 114:78.0 115:211.0 116:80.0 118:35.0 126:34.0 128:120.0 130:82.0 131:147.0 133:126.0 134:47.0 140:9.0 141:127.0 144:44.0 147:941.0 149:24.0 154:56.0 157:125.0 158:18.0 160:52.0 168:25.0 169:130.0 170:75.0 171:223.0 185:350.0 186:191.0 187:34.0 188:107.0 189:28.0 190:46.0 191:59.0 196:21.0 20…				0	0.5	1892	2080	1607	1110	818	2707	2232	781	4215	6429	3008	7318	977	5306	1798	821	5902	769	3616	2292	3330	1912	1291	1347	3378	3346	1272	1058	1546	1239	1052	750	8260	1132	2323	2221	1806	1934	1460	1324
215881	539642	245	215881	97:420.0 122:125.0 134:663.0 137:82.0 141:69.0 145:283.0 147:20596.0 148:2606.0 149:1710.0 151:122.0 161:225.0 163:486.0 164:202.0 165:43.0 170:28.0 178:142.0 179:53.0 188:42.0 189:303.0 195:320.0 197:49.0 211:55.0 212:10.0 213:90.0 222:236.0 228:24.0 231:602.0 232:34.0 233:48.0 239:29.0 245:2120.0 247:56.0 258:264.0 259:111.0 261:19.0 264:62.0 270:43.0 271:25.0 279:36.0 280:60.0 292:25.0 302:8.0…				0.16	0.03	8888	8834	5916	2800	2835	377	6703	5424	5175	830	13749	11505	5965	510	1228	5404	432	336	5960	8306	2752	5060	8747	5131	7127	853	644	7639	9368	6722	5345	5950	8616	17239	603	8858	391	294	7992	1189
215866	644147	144	215866	91:131.0 120:28.0 144:3772.0 145:487.0 146:229.0 164:13.0 176:123.0 220:14.0 232:53.0 234:50.0 244:74.0 245:14.0 248:36.0 265:16.0 293:9.0 308:19.0 349:15.0 369:34.0 380:22.0 381:25.0 403:22.0 404:16.0 408:28.0 412:24.0 425:29.0 427:42.0 429:28.0 439:32.0 445:8.0 450:24.0 453:22.0 455:16.0 460:15.0 461:45.0 462:56.0 463:37.0 465:16.0 474:8.0 475:29.0 477:16.0 488:23.0 497:33.0				0.27	0	2776	2673	798	1269	564	1028	862	443	598	636	1102	562	522	12224	913	462	666	758	2938	285	424	1631	329	1036	1181	574	2909	605	1874	584	558	422	3003	798	957	1239	1049	2914	1811	684
213980	434474	148	213980	89:477.0 90:687.0 91:392.0 100:76.0 104:20.0 116:177.0 117:46.0 120:35.0 121:31.0 132:47.0 148:1151.0 149:140.0 151:16.0 177:208.0				0	0.49	5662	34984	6231	11549	3092	16750	4470	5862	8011	20651	13360	21648	6432	10880	15540	7820	4077	4250	4021	4486	5834	3103	2887	6422	9509	10288	7338	3549	4721	5941	4181	2240	13968	19734	2780	47293	3020	2126	8383	16514
213019	802079	159	213019	85:2846.0 86:130.0 87:341.0 88:163.0 89:5074.0 90:343.0 91:404.0 94:17.0 95:129.0 96:35.0 97:220.0 99:479.0 101:3077.0 102:278.0 103:9168.0 104:758.0 105:454.0 106:123.0 107:83.0 108:17.0 109:64.0 110:63.0 111:2578.0 112:133.0 113:465.0 114:56.0 115:526.0 116:2026.0 117:1825.0 118:219.0 119:367.0 123:133.0 125:143.0 127:302.0 129:3423.0 130:835.0 131:2914.0 132:226.0 133:3151.0 134:397.0 135:370.…				0.16	0	539	310	145	189	106	136	201	80	166	175	151	153	67	479	134	151	119	122	318	118	88	118	133	157	102	310	104	109	153	145	347	414	426	166	157	143	1412	211	460	85
211214	899271	205	211214	88:26.0 89:508.0 92:30.0 95:84.0 99:122.0 101:408.0 103:2778.0 104:266.0 105:315.0 107:99.0 108:52.0 109:53.0 111:34.0 117:1471.0 118:230.0 119:34.0 120:40.0 123:47.0 124:29.0 129:248.0 131:374.0 132:123.0 133:1074.0 134:55.0 138:25.0 143:280.0 144:144.0 145:186.0 146:77.0 147:5163.0 148:820.0 149:523.0 151:84.0 153:82.0 154:76.0 155:120.0 160:87.0 161:18.0 163:28.0 164:39.0 166:24.0 171:36.0 186…				0.24	0	1842	1413	2151	1379	1128	830	273	1716	1128	10637	2676	660	18700	539	2915	1210	1186	644	3566	1339	440	10690	1569	1740	730	3964	4609	1656	1684	3109	1015	574	1879	481	1740	1040	390	369	981	2564
211131	578768	216	211131	85:280.0 86:353.0 91:41.0 93:35.0 94:231.0 95:53.0 96:357.0 97:175.0 98:7097.0 99:552.0 102:208.0 103:724.0 104:86.0 108:148.0 110:60.0 113:76.0 116:353.0 121:30.0 124:123.0 126:8183.0 127:586.0 128:42.0 129:1616.0 130:374.0 131:319.0 136:79.0 143:324.0 144:102.0 145:101.0 146:280.0 154:107.0 156:546.0 157:173.0 158:144.0 172:161.0 173:3068.0 174:605.0 175:121.0 182:25.0 184:55.0 188:27.0 200:447…				0.33	0	1376	5327	983	1231	1645	2588	1057	1716	1661	1583	1615	4681	642	2940	472	788	717	1287	1566	2008	1439	2287	762	705	1184	476	1575	500	2742	1289	3321	386	1982	3215	782	7616	367	447	3384	1288
210993	877833	217	210993	85:1874.0 86:6086.0 87:3720.0 89:1248.0 92:221.0 93:195.0 97:335.0 98:786.0 100:982.0 101:1917.0 102:586.0 103:11469.0 105:642.0 111:583.0 113:1097.0 114:601.0 115:1017.0 116:1214.0 117:6498.0 118:1024.0 120:197.0 124:170.0 125:122.0 127:248.0 128:696.0 129:763.0 130:447.0 131:236.0 132:968.0 133:4900.0 135:521.0 141:66.0 142:2643.0 143:1684.0 145:366.0 146:1190.0 147:27126.0 148:4249.0 149:2761.…				0.15	0	4857	2450	4562	2970	1979	3835	3815	3565	3427	1710	840	194	5254	694	1457	3404	2158	1063	3023	1868	2333	3057	1953	3990	3498	1755	2119	3240	4751	5211	5051	4739	7648	3002	1530	5340	360	155	5471	6114
210714	287683	171	210714	99:1700.0 100:1217.0 102:133.0 103:105.0 107:108.0 108:32.0 113:250.0 114:137.0 118:113.0 122:140.0 123:28.0 124:39.0 131:645.0 132:722.0 134:79.0 139:104.0 141:93.0 143:57.0 146:578.0 147:6666.0 148:1028.0 149:563.0 152:90.0 155:138.0 157:168.0 158:38.0 171:3665.0 172:697.0 173:1229.0 174:66.0 175:58.0 183:15.0 185:53.0 187:39.0 188:106.0 189:442.0 190:109.0 196:39.0 197:31.0 204:474.0 205:87.0 …				0	0.28	75	536	37683	6918	6227	188	512	317	225	196	209	240	784	13657	416	220	447	294	7473	312	220	6389	3221	297	149	7566	403	392	7310	509	310	5121	486	503	6338	7552	573	128	389	365
210666	297205	172	210666	85:308.0 86:1012.0 89:451.0 96:354.0 98:230.0 99:349.0 100:309.0 102:265.0 103:13579.0 104:1148.0 105:553.0 109:52.0 110:52.0 111:64.0 112:25.0 113:312.0 114:161.0 115:51.0 116:222.0 117:228.0 118:65.0 122:48.0 123:59.0 124:35.0 126:315.0 128:74.0 129:281.0 130:256.0 132:202.0 133:82.0 136:65.0 138:58.0 139:113.0 140:91.0 141:76.0 142:294.0 143:73.0 144:1652.0 145:172.0 153:50.0 154:94.0 155:69.0…				0.03	0.11	739	1859	3198	334	766	1381	2400	1908	2166	1732	475	2459	2377	3642	2331	3025	871	601	403	1667	1621	290	979	2348	1524	1539	2815	2970	2042	1668	4424	233	4637	2396	437	2954	4753	784	5427	1363
210403	463407	205	210403	85:228.0 89:107.0 102:274.0 117:370.0 118:21.0 126:84.0 139:2.0 144:70.0 147:1974.0 174:4.0 205:221.0				0.2	0	3490	1896	3529	2156	1097	2221	2144	165	1275	1625	1130	237	2498	1829	786	1270	756	117	279	123	757	315	368	858	1077	644	1653	276	2158	3355	2195	1751	4143	1422	565	390	1480	390	361	40
210338	462461	175	210338	87:122.0 89:38.0 95:102.0 98:47.0 99:126.0 101:1877.0 103:336.0 109:82.0 111:37.0 115:30.0 117:553.0 119:113.0 130:107.0 131:553.0 133:1668.0 146:79.0 147:1564.0 148:161.0 149:1395.0 150:64.0 151:195.0 158:6.0 163:2.0 171:42.0 172:2.0 173:13.0 175:628.0 189:236.0 190:143.0 191:114.0 193:4.0 281:3.0 308:3.0 335:9.0				0.22	0.03	3113	111	3117	1987	974	2600	2029	1707	2406	1505	814	969	2464	5250	1890	1086	870	1728	4347	1260	671	1164	708	685	2350	1008	3071	1950	1343	2992	1928	1252	3495	1015	1050	1609	1258	1072	2640	756
210313	565988	217	210313	88:83.0 89:337.0 95:106.0 99:68.0 100:88.0 103:2325.0 104:193.0 116:75.0 117:950.0 129:803.0 130:183.0 133:510.0 134:58.0 139:25.0 141:26.0 142:7.0 146:56.0 157:80.0 170:16.0 183:59.0 189:98.0 191:97.0 204:81.0 205:456.0 217:1739.0 218:249.0 219:24.0 221:37.0 243:100.0 307:24.0 319:23.0				0.13	0.08	3353	1130	5080	3694	1220	1105	1895	3554	3096	1755	2070	437	1531	2209	1090	6966	1124	850	1095	4455	1211	1211	3277	1449	4025	4508	1984	1035	2005	7250	1927	1162	10287	1408	1313	1338	1840	1402	7941	1197
210272	700671	220	210272	86:9319.0 89:171596.0 90:14667.0 91:17916.0 94:766.0 95:1161.0 97:8463.0 98:3475.0 99:12666.0 100:145403.0 101:75879.0 102:57843.0 104:17992.0 105:27190.0 106:4447.0 107:1338.0 108:758.0 109:1485.0 110:1347.0 111:10858.0 112:3583.0 113:19610.0 115:29860.0 116:43047.0 117:86611.0 118:13704.0 119:22647.0 120:3167.0 121:2178.0 122:659.0 123:598.0 124:1151.0 125:3035.0 126:5764.0 127:13452.0 128:1317…				0.44	1	697	795	461	583	955	1452	688	577	1440	835	787	619	655	910	692	1326	306	1020	850	538	463	1936	930	2706	1670	705	634	2103	2515	759	268	934	835	567	787	608	11434	871	372	1589
210239	247452	89	210239	85:5612.0 86:1813.0 88:439.0 89:60596.0 90:5049.0 91:2570.0 96:1180.0 97:400.0 98:979.0 99:2506.0 100:8545.0 101:1779.0 105:3091.0 106:70.0 112:314.0 113:1080.0 114:92.0 116:568.0 117:2815.0 118:268.0 127:3616.0 128:1092.0 140:271.0 141:901.0 142:816.0 143:343.0 144:69.0 147:10735.0 157:302.0 170:248.0 174:175.0 184:61.0 186:5267.0 187:452.0 188:275.0 202:1408.0 203:159.0 217:538.0 218:85.0 280:2…				0	0.21	4813	3240	6221	6546	1760	535	2637	2564	2828	6882	2338	6180	6529	4103	4107	1996	1897	4125	3686	3598	2059	3401	1938	5217	2322	6421	6472	2436	1958	4026	2745	2991	4062	4448	3780	10163	23928	4819	3954	2291
209687	651164	101	209687	85:81506.0 86:84784.0 87:98814.0 88:67735.0 89:778209.0 90:68703.0 91:37968.0 92:6923.0 94:8963.0 95:7904.0 96:10858.0 97:38335.0 98:20485.0 99:89752.0 100:150936.0 101:345818.0 102:142654.0 103:1263719.0 104:124756.0 105:364949.0 106:39282.0 107:13495.0 108:5045.0 109:4838.0 110:14820.0 111:40907.0 112:29547.0 113:77217.0 114:153915.0 115:148906.0 116:118143.0 117:1228985.0 118:121349.0 119:1252…				0.05	0.3	236295	101622	46586	104610	47760	83244	97535	24138	237850	27752	45727	73540	56089	175110	122038	48726	28733	31380	58512	56563	69803	60442	39453	42462	45177	113622	85911	31461	96109	58876	61488	60886	143978	57493	23660	48212	181369	107989	43798	37686
209171	651016	205	209171	86:35836.0 87:7325.0 88:53314.0 89:212271.0 98:10849.0 99:4514.0 100:108331.0 101:72921.0 103:1170815.0 104:42158.0 105:117479.0 106:7595.0 111:1228.0 112:15070.0 114:105043.0 116:37243.0 117:316481.0 118:15011.0 120:3673.0 122:2890.0 123:1701.0 124:4796.0 126:4590.0 128:8608.0 133:236125.0 134:21368.0 135:6063.0 136:10002.0 137:3589.0 139:262.0 140:7744.0 141:5759.0 142:42962.0 143:83405.0 144:1…				0.05	0.58	1720252	764499	321736	759959	352623	581805	688332	170834	1819162	185924	331238	504425	388316	1302700	917249	351584	196333	208582	413425	395870	487554	452337	291497	282731	296020	834699	587470	211027	731432	409580	432011	450244	1065005	389000	159519	338280	4430147	807326	302177	246212
206559	1192216	217	206559	85:3171.0 86:603.0 87:2021.0 88:1900.0 89:3819.0 90:371.0 91:742.0 92:184.0 93:333.0 94:271.0 95:985.0 96:450.0 97:1825.0 98:492.0 99:3087.0 100:606.0 101:5265.0 102:2060.0 103:69875.0 104:6670.0 105:3511.0 106:315.0 107:362.0 108:161.0 109:6446.0 110:540.0 111:3956.0 112:665.0 113:2810.0 114:637.0 115:3305.0 116:2028.0 117:13947.0 118:1312.0 119:1938.0 120:227.0 121:296.0 122:76.0 123:246.0 124:…				0.28	0	358	740	405	154	134	174	270	162	155	54	280	618	286	232	223	259	128	139	151	176	195	0	96	128	187	216	501	144	80	162	207	121	333	262	108	419	2601	364	313	121
204582	519464	179	204582	85:10216.0 86:3792.0 87:21469.0 88:25982.0 89:42728.0 90:11089.0 91:67132.0 92:5784.0 93:7026.0 94:1818.0 95:5183.0 96:2451.0 97:4271.0 98:2787.0 99:15590.0 101:66641.0 102:76432.0 103:419330.0 104:272001.0 105:187339.0 106:39910.0 107:15023.0 108:1867.0 109:2352.0 110:217.0 111:5146.0 112:1482.0 113:7241.0 114:2038.0 115:48686.0 116:143313.0 117:76470.0 118:30094.0 119:61669.0 120:11791.0 121:23…				0	0.28	100	128	127	65	75	35	92	92	138	72	31	110	37	59	50	79	72	73	50	119	42	65	40	75	49	33	115	103	57	99	66	87	301	225	58	100	158	60	192	76
204022	510014	272	204022	85:2995.0 86:12279.0 87:3131.0 88:2479.0 91:2584.0 94:265.0 97:538.0 98:843.0 100:41933.0 101:5214.0 102:2069.0 103:637.0 104:2517.0 105:598.0 108:1022.0 109:553.0 110:6389.0 111:858.0 112:368.0 113:2111.0 114:3613.0 115:945.0 116:5654.0 118:2744.0 120:611.0 123:83.0 124:74.0 129:2090.0 131:2965.0 132:1860.0 133:329.0 134:27405.0 135:3265.0 136:1462.0 140:89.0 141:821.0 143:945.0 146:507.0 150:38…				0	0.29	98	181	67	183	141	102	47	58	53	72	37	310	89	366	85	33	74	192	91	262	75	65	21	75	77	347	59	225	92	92	71	158	159	430	33	231	85	20	393	152
199088	270415	191	199088	85:3500.0 86:3975.0 87:3789.0 88:1477.0 89:2103.0 91:407.0 94:100.0 98:2171.0 99:1701.0 100:11860.0 101:3881.0 102:2236.0 103:25224.0 104:2581.0 105:3050.0 106:364.0 109:292.0 111:68.0 112:483.0 113:1074.0 114:1860.0 115:3674.0 116:1325.0 117:3788.0 118:949.0 119:1913.0 121:96.0 122:60.0 123:22.0 124:52.0 125:61.0 126:1419.0 127:532.0 128:8038.0 129:2059.0 130:2373.0 131:13679.0 132:2437.0 133:12…				0.49	0.08	64888	73135	64280	54485	24976	61279	47996	42436	35145	43900	31035	67823	81344	51221	63177	40291	31272	48948	42149	54798	32262	34254	21954	63542	47768	60564	76442	56425	38260	62567	40922	19945	66046	92260	20367	73277	27488	23605	75725	48434
189616	498281	194	189616	89:573.0 91:29.0 93:64.0 95:18.0 101:103.0 103:24.0 107:136.0 109:125.0 110:79.0 111:8.0 113:28.0 123:3.0 127:23.0 131:1.0 133:511.0 134:149.0 135:70.0 136:122.0 137:286.0 151:109.0 156:156.0 157:35.0 158:2.0 163:289.0 164:108.0 165:305.0 166:108.0 179:186.0 180:22.0 184:203.0 185:16.0 189:11.0 190:2.0 193:2826.0 194:5411.0 195:764.0 196:180.0 204:98.0 205:468.0 209:2321.0 210:373.0 211:5.0 224:1…				0.24	0	1261	85	1468	1314	827	1404	1720	813	1007	3578	601	979	3386	748	1214	893	1300	2790	1149	1203	824	870	407	1453	1033	1462	2107	141	1067	1468	1314	918	1715	2990	605	184	96	193	168	1132
188923	763772	204	188923	85:1717.0 86:200.0 87:1201.0 89:2365.0 90:221.0 91:96.0 93:39.0 95:257.0 97:283.0 98:130.0 99:1976.0 100:746.0 101:5601.0 102:804.0 103:20741.0 104:1823.0 105:703.0 107:319.0 109:991.0 110:244.0 111:765.0 113:1546.0 114:226.0 115:1210.0 116:3830.0 117:9967.0 118:1334.0 119:959.0 125:24.0 127:745.0 128:158.0 129:19261.0 130:2633.0 131:9530.0 132:3348.0 133:8395.0 134:1814.0 135:428.0 137:20.0 139:…				0.19	0	7496	643	3094	8311	4092	2031	8441	6584	7433	4417	3080	2843	8674	1268	5021	3934	3521	1267	4263	7755	4295	6978	3352	7290	7482	4926	1493	8124	9733	9681	7861	5415	5141	303	2455	3884	4527	1750	1657	8639
171564	664278	319	171564	85:2761.0 86:3346.0 87:4228.0 88:2103.0 89:31879.0 90:2123.0 91:1214.0 92:322.0 94:363.0 97:1045.0 98:901.0 99:2436.0 100:6060.0 101:8894.0 102:4115.0 103:50203.0 104:4606.0 105:11919.0 106:1065.0 107:316.0 108:116.0 110:513.0 111:514.0 112:1021.0 113:2200.0 114:4299.0 115:3545.0 116:2488.0 117:38102.0 118:4525.0 119:4119.0 120:510.0 123:43.0 124:103.0 126:858.0 127:1005.0 128:1579.0 129:38424.0 …				0.01	0.23	4940	7858	2427	3893	1432	865	3797	1057	5473	4592	4032	5488	2529	14036	3660	1521	2338	1980	5168	1893	4209	3224	1255	3915	3298	6879	4938	3076	4769	2418	1945	969	3422	4993	3891	4280	5054	12956	3374	1780
171305	1134692	441	171305	88:135.0 90:82.0 91:3094.0 93:204.0 104:125.0 105:1465.0 107:724.0 109:117.0 115:711.0 116:208.0 117:1307.0 118:263.0 119:1039.0 121:77.0 122:55.0 123:81.0 128:457.0 129:174.0 131:263.0 132:443.0 133:1032.0 135:337.0 136:69.0 137:93.0 140:29.0 141:84.0 142:59.0 145:282.0 147:5369.0 149:313.0 157:117.0 159:217.0 161:242.0 163:66.0 164:12.0 165:86.0 175:201.0 177:148.0 189:334.0 191:1531.0 192:259.…				0	0.3	110	244	128	104	25	131	70	26	62	225	79	427	42	105	45	62	365	193	83	90	67	24	45	63	90	417	344	115	50	100	53	123	80	70	29	259	76	74	66	113
170766	686475	158	170766	86:468.0 92:40.0 94:30.0 95:131.0 102:101.0 104:19.0 110:57.0 126:50.0 140:54.0 141:63.0 142:110.0 152:19.0 154:16.0 156:733.0 157:128.0 158:5386.0 159:688.0 160:451.0 233:13.0 477:9.0				0.18	0	2218	2188	800	1013	807	786	808	443	888	501	995	435	665	4918	827	460	235	425	3134	203	6570	1849	322	612	1130	571	1170	602	2391	986	895	385	984	712	846	1856	1465	1210	979	691
170728	708283	174	170728	86:6547.0 87:959.0 88:564.0 100:3292.0 101:604.0 102:1401.0 103:1393.0 104:109.0 107:51.0 110:318.0 113:395.0 114:415.0 115:466.0 116:760.0 117:2497.0 121:145.0 125:104.0 126:123.0 130:1191.0 133:1305.0 143:162.0 144:367.0 146:361.0 147:4445.0 148:799.0 149:1029.0 150:71.0 153:94.0 158:509.0 159:429.0 170:94.0 171:47.0 172:584.0 173:238.0 174:22084.0 175:3698.0 176:3215.0 177:447.0 178:109.0 181:…				0.81	0.06	21014	5374	30285	13564	6912	3818	4107	10982	7972	10144	8639	2245	3303	6514	3211	5997	2208	2905	5366	19925	7672	5271	6139	4367	40687	1270	6159	4880	2481	7508	5579	2400	57287	1629	9020	2654	4466	6693	47070	5293
170725	632248	144	170725	86:311.0 89:99.0 97:101.0 100:184.0 101:179.0 102:85.0 103:143.0 110:30.0 112:30.0 113:33.0 114:24.0 116:74.0 118:46.0 124:19.0 128:147.0 129:625.0 130:56.0 132:162.0 133:185.0 142:60.0 143:79.0 144:8363.0 145:1065.0 146:532.0 147:454.0 149:123.0 156:71.0 157:210.0 158:28.0 159:18.0 161:22.0 167:16.0 171:36.0 183:16.0 189:102.0 191:106.0 198:19.0 203:38.0 204:120.0 205:49.0 213:34.0 216:23.0 217:…				0.16	0	6528	7326	3588	4821	28959	11059	7966	13190	7060	9199	6823	4607	8299	13870	11265	12419	16282	20828	18447	6272	25581	20916	11569	30070	14505	6115	7174	22577	15427	9765	2289	11139	4343	3493	8834	4081	1793	6525	3723	25665
170498	529748	257	170498	85:1244.0 86:4428.0 87:750.0 88:967.0 89:1538.0 90:167.0 91:280.0 95:95.0 98:2296.0 99:1944.0 100:4492.0 101:909.0 102:1534.0 103:16768.0 104:1040.0 105:967.0 109:410.0 111:239.0 112:321.0 113:1271.0 114:1239.0 115:1508.0 116:2000.0 117:1362.0 118:470.0 119:720.0 120:37.0 121:172.0 126:714.0 128:1198.0 129:1359.0 130:650.0 131:3492.0 132:467.0 133:4024.0 134:634.0 135:483.0 136:74.0 137:77.0 140:…				0.23	0	1199	120	1498	1065	424	877	1522	112	847	1456	515	170	1185	1036	1920	1545	508	551	867	119	616	772	489	1996	1232	488	804	1739	2043	652	2120	114	1619	94	751	760	387	385	75	1280
169221	726249	378	169221	85:287.0 87:530.0 88:299.0 91:519.0 92:178.0 93:368.0 94:282.0 95:560.0 97:454.0 99:942.0 100:533.0 103:883.0 104:264.0 105:473.0 107:437.0 111:257.0 114:90.0 115:879.0 116:553.0 117:1518.0 118:309.0 119:528.0 120:121.0 121:410.0 122:73.0 123:168.0 125:69.0 128:344.0 129:1203.0 130:598.0 131:865.0 133:1151.0 134:297.0 135:484.0 138:188.0 139:173.0 142:187.0 143:305.0 144:218.0 145:535.0 146:141.0…				0.48	0	3783	1533	2471	5131	4011	3986	3761	6363	3674	6053	2074	1854	7046	1152	6148	2453	2601	2068	4686	6658	3638	5662	1878	8896	6061	2936	1276	4070	11188	4259	5379	3052	4821	798	3233	3024	71	79	2933	9400
169219	621790	225	169219	85:1941.0 87:1197.0 91:13447.0 92:3696.0 93:10598.0 94:1940.0 95:3862.0 97:528.0 101:5713.0 105:11526.0 106:3463.0 107:8282.0 108:1538.0 109:1291.0 111:1006.0 112:272.0 114:641.0 115:1534.0 116:6262.0 117:16525.0 118:3183.0 119:18904.0 120:3472.0 121:1802.0 122:838.0 123:66.0 124:296.0 127:1487.0 129:8489.0 130:2479.0 131:1566.0 132:2486.0 133:7630.0 134:30909.0 135:7762.0 136:784.0 137:979.0 138…				0.51	0.1	11575	550	7178	8764	2877	2702	2177	7659	7480	7801	5640	6005	10217	1402	6953	5004	5590	1303	4572	8982	5175	5186	2315	6786	6686	6223	2398	8893	9461	13243	10955	5129	6994	2026	4643	420	60	71	4536	6520
169071	611823	290	169071	85:299.0 86:224.0 87:112.0 88:285.0 89:253.0 90:382.0 91:420.0 92:390.0 93:474.0 95:410.0 97:264.0 99:1209.0 100:1298.0 102:845.0 103:94.0 104:406.0 105:592.0 106:420.0 107:435.0 108:248.0 109:261.0 113:71.0 114:681.0 115:2885.0 116:1186.0 118:184.0 119:552.0 120:866.0 121:351.0 122:235.0 123:178.0 128:224.0 129:999.0 130:3813.0 131:1466.0 132:72.0 133:1160.0 135:341.0 136:143.0 137:142.0 138:308…				0.37	0	2537	748	1274	2407	1267	2053	1524	2443	2063	2762	280	2259	2352	917	2137	1163	1918	878	3939	3909	723	2794	454	3157	955	1743	857	3291	1864	1736	1379	808	2444	728	1244	1329	119	133	2226	5117
169067	753988	308	169067	86:2233.0 87:4191.0 88:5529.0 89:10839.0 90:2751.0 91:4582.0 92:2239.0 93:3533.0 94:1474.0 95:2658.0 96:325.0 99:4182.0 100:6094.0 101:7673.0 102:5787.0 103:14201.0 104:8324.0 105:6994.0 106:5055.0 107:3779.0 108:1417.0 109:3735.0 110:1483.0 111:755.0 113:776.0 114:2036.0 115:11983.0 116:14683.0 117:12182.0 118:3781.0 119:6358.0 120:4314.0 121:2692.0 122:1508.0 123:1352.0 124:1094.0 126:475.0 127…				0.48	0	4106	718	2210	310	2880	3207	1632	5257	2516	3280	693	1731	2958	316	1542	2424	4328	1137	4012	7179	2039	5632	1486	4919	5374	3448	783	933	8514	8703	6277	2933	3892	1152	1502	1721	63	27	2414	6514
168764	598688	174	168764	85:2029.0 86:59054.0 88:3077.0 89:6773.0 90:871.0 91:357.0 92:3.0 94:32.0 98:228.0 99:1363.0 100:25913.0 101:7993.0 102:4514.0 103:1758.0 104:638.0 105:150.0 108:28.0 109:95.0 112:85.0 113:1305.0 114:1121.0 115:925.0 116:11755.0 117:6347.0 118:1448.0 119:580.0 120:43.0 121:10.0 122:37.0 123:82.0 127:645.0 128:812.0 129:7297.0 130:13451.0 131:3284.0 132:1898.0 133:2114.0 134:176.0 137:53.0 138:38.…				0.13	0	5752	56013	5607	5658	26255	10080	38211	10327	28660	8628	9558	46381	5395	6518	11412	17542	19355	16640	11019	24907	9655	11895	9371	8355	9236	7382	4793	9663	6127	5286	2854	10784	5475	32670	7464	12053	1760	3490	17713	8969
163872	513029	217	163872	87:35.0 89:442.0 101:1396.0 102:136.0 103:1291.0 104:157.0 105:237.0 111:403.0 113:70.0 114:91.0 115:204.0 116:299.0 117:1416.0 119:148.0 129:6105.0 130:521.0 131:1451.0 132:230.0 133:2978.0 134:277.0 135:189.0 143:1880.0 144:120.0 145:60.0 147:7779.0 148:1069.0 149:553.0 150:50.0 155:106.0 172:44.0 174:185.0 175:145.0 189:51.0 191:64.0 203:319.0 204:79.0 205:251.0 213:20.0 215:69.0 216:352.0 217…				0.33	0	1752	1573	2353	848	550	1037	1225	988	367	1208	1169	1343	1556	2284	1078	2158	402	683	861	1087	453	930	582	1234	689	910	1669	1531	827	1454	1477	2031	4815	1617	593	1284	3887	2154	7016	409
163410	527915	241	163410	85:7517.0 86:2588.0 87:3489.0 88:1130.0 89:1555.0 90:217.0 91:431.0 92:147.0 94:255.0 95:434.0 96:451.0 97:973.0 98:3964.0 99:2474.0 100:11481.0 101:3804.0 102:2642.0 103:4378.0 104:727.0 105:1514.0 106:431.0 107:226.0 108:256.0 109:35.0 110:372.0 111:212.0 112:2159.0 113:3757.0 114:3049.0 115:3173.0 116:3502.0 117:3533.0 118:730.0 119:1225.0 120:267.0 121:110.0 122:85.0 123:44.0 124:301.0 125:31…				0.11	0.03	1043	372	1084	846	235	852	1142	585	192	654	832	511	763	665	940	988	238	567	791	598	399	522	417	904	610	527	1101	886	1158	870	1298	827	1114	391	809	411	1027	212	473	657
161875	386583	217	161875	85:1641.0 89:407.0 91:1339.0 94:146.0 96:602.0 98:405.0 103:1131.0 104:363.0 105:356.0 106:265.0 107:401.0 109:152.0 110:8071.0 111:4985.0 112:1416.0 114:1107.0 115:613.0 116:934.0 119:563.0 122:85.0 123:124.0 124:95.0 125:183.0 127:1938.0 128:449.0 129:8901.0 130:3350.0 131:2561.0 132:859.0 133:3029.0 137:227.0 141:92.0 142:1635.0 143:14179.0 144:1950.0 145:1560.0 147:15998.0 148:2835.0 149:2500…				0.11	0.7	2314	2623	2247	1945	1062	2433	1624	1864	1281	2179	1090	2374	2708	1902	2250	1269	1081	1972	1729	2227	1645	1423	784	2400	1912	1763	2600	1710	2255	1882	1745	1283	2660	2523	1854	2820	1713	1690	2866	1905
161398	844072	93	161398	85:1395.0 86:377.0 87:412.0 88:316.0 89:1423.0 90:169.0 91:25159.0 92:5631.0 93:21359.0 94:8703.0 95:8072.0 96:1292.0 97:1604.0 98:971.0 99:1091.0 101:600.0 102:307.0 103:2829.0 104:1323.0 105:11726.0 106:4261.0 107:9337.0 108:8494.0 109:3021.0 110:583.0 111:562.0 112:128.0 113:342.0 115:1852.0 116:1625.0 117:10416.0 118:1424.0 119:10236.0 120:2645.0 121:5106.0 122:3355.0 123:964.0 124:162.0 125:…				0.23	0	5198	9061	797	6845	16868	7596	4042	7545	16214	10751	7983	29331	4797	9024	602	2937	3662	6523	9338	16198	8291	17069	2786	2903	12504	9435	8048	7208	3128	2924	1806	1517	3649	17741	6497	41938	897	20289	6658	7313
161381	564053	140	161381	85:247.0 86:378.0 87:328.0 88:202.0 89:2611.0 90:230.0 92:50.0 95:74.0 96:351.0 97:85.0 99:208.0 100:3111.0 101:1295.0 102:868.0 103:1283.0 104:37.0 105:253.0 110:189.0 111:187.0 112:380.0 113:126.0 114:428.0 115:1034.0 116:617.0 117:4711.0 118:518.0 119:395.0 123:34.0 124:70.0 126:411.0 128:1068.0 129:364.0 130:833.0 131:1234.0 132:672.0 133:2099.0 134:222.0 135:264.0 136:74.0 137:42.0 138:87.0 …				0	0.89	266	116	67	112	289	365	406	140	192	244	183	192	341	98	232	185	194	75	121	348	254	195	192	321	341	288	223	510	782	379	209	81	344	544	9	69	967	236	508	362
160935	1126102	345	160935	86:589.0 89:875.0 91:7835.0 92:1067.0 93:7069.0 94:1091.0 95:3382.0 99:359.0 100:182.0 101:1613.0 102:490.0 103:1471.0 105:7413.0 106:1221.0 107:7504.0 108:777.0 109:2272.0 110:395.0 111:271.0 112:161.0 113:518.0 115:1569.0 116:2009.0 117:10084.0 118:1422.0 119:4552.0 120:841.0 121:2999.0 122:1543.0 123:1154.0 124:164.0 125:340.0 127:314.0 128:869.0 129:6479.0 130:643.0 131:3960.0 132:1306.0 133:…				0.2	0	466	4559	954	1338	495	3752	593	566	1286	366	1179	5918	476	130	367	401	541	408	1004	942	645	364	300	510	659	970	446	664	63	317	839	139	2342	1138	488	6323	77	27	587	717
160761	688385	352	160761	85:1690.0 86:1090.0 87:450.0 88:418.0 95:75.0 96:137.0 97:174.0 98:842.0 99:3527.0 100:5847.0 101:1707.0 102:598.0 103:1479.0 104:212.0 105:155.0 109:169.0 110:251.0 111:794.0 112:225.0 113:506.0 114:340.0 115:420.0 116:2304.0 117:1878.0 118:377.0 119:190.0 122:47.0 123:65.0 124:175.0 125:424.0 128:314.0 129:1238.0 130:1407.0 131:1654.0 132:494.0 133:1490.0 134:109.0 137:250.0 138:64.0 139:144.0 …				0.23	0	1617	419	373	814	1221	122	1201	314	416	389	65	299	287	258	469	138	399	313	750	1148	560	854	291	1006	906	364	113	567	4683	337	263	373	656	151	162	256	87	1439	202	258
160746	848063	87	160746	85:1174.0 86:569.0 87:45964.0 88:2232.0 89:6019.0 90:292.0 91:1863.0 93:2866.0 94:657.0 95:3452.0 96:4001.0 97:3560.0 98:725.0 99:324.0 100:12033.0 101:2002.0 102:226.0 105:748.0 109:932.0 110:1588.0 111:2444.0 112:812.0 114:540.0 115:621.0 116:933.0 117:2461.0 119:164.0 120:329.0 121:1964.0 122:600.0 123:443.0 124:818.0 125:1136.0 126:513.0 128:748.0 129:3732.0 136:341.0 138:6560.0 139:1567.0 14…				0.67	0	3710	142059	11547	38036	13931	98187	3515	7081	39964	117129	17422	62907	4385	39638	50483	2972	95808	91469	165009	27380	17165	41782	19473	17426	36304	60380	91320	3254	3727	3470	1891	2066	3085	218981	44249	44374	1512	17099	3618	49582
146585	348125	124	146585	85:21115.0 86:596.0 91:384.0 92:116.0 93:1588.0 94:6754.0 95:671.0 96:845.0 97:1038.0 103:18551.0 104:1725.0 105:380.0 108:1386.0 110:1261.0 112:688.0 124:29360.0 125:3609.0 126:2523.0 129:806.0 142:589.0 143:215.0 145:342.0 150:39.0 152:218.0 154:221.0 155:160.0 156:438.0 157:523.0 158:2999.0 159:913.0 168:9693.0 169:1302.0 170:682.0 171:458.0 183:4268.0 184:1387.0 186:7576.0 187:1222.0 197:104.…				0.37	0	2075	1062	1559	2277	1606	1559	1098	2506	1690	507	1855	849	1304	2458	1063	1327	569	2127	1565	2866	924	2576	1338	883	1024	1580	1624	1492	713	2162	1604	1504	1676	2930	1252	968	1006	586	2002	729
146575	595929	112	146575	85:10114.0 86:11946.0 87:14972.0 88:3841.0 90:1688.0 91:2189.0 92:2032.0 94:1621.0 96:3450.0 97:4455.0 98:3776.0 100:7877.0 102:7040.0 106:741.0 107:917.0 110:1394.0 111:18173.0 112:372655.0 113:34980.0 114:34484.0 116:11153.0 117:8053.0 118:1900.0 120:1685.0 126:1809.0 127:3929.0 128:3368.0 129:70699.0 130:20606.0 131:6303.0 132:1615.0 136:682.0 138:677.0 139:1030.0 142:1783.0 144:7910.0 145:252…				0	0.16	296	3324	513	740	1705	5689	503	471	1721	2351	1317	2896	689	2911	2389	440	6440	6719	6681	619	2295	1573	1220	1097	1325	1595	2606	441	281	865	508	360	1563	1125	928	4309	911	1468	779	1860
146317	915728	259	146317	85:388.0 87:322.0 89:2995.0 93:110.0 95:72.0 97:1749.0 98:176.0 101:2185.0 102:151.0 103:6557.0 104:652.0 105:1308.0 106:39.0 111:300.0 114:671.0 115:739.0 116:1561.0 117:5184.0 118:578.0 120:40.0 123:58.0 127:301.0 129:5073.0 130:677.0 131:2013.0 132:611.0 133:4476.0 134:821.0 141:283.0 143:1403.0 147:11376.0 148:901.0 149:1697.0 150:224.0 153:157.0 155:525.0 157:1363.0 159:274.0 160:1782.0 161:…				0.13	0	1625	678	469	737	496	455	721	841	1076	856	1409	469	668	530	635	606	667	242	293	196	742	405	397	808	365	357	831	1049	541	302	817	355	5606	219	402	376	159	242	2108	153
146233	1161202	121	146233	85:720.0 86:72.0 87:128.0 88:349.0 89:1256.0 90:257.0 91:7718.0 92:709.0 93:6717.0 94:1632.0 95:4295.0 96:1178.0 97:445.0 99:704.0 101:1720.0 102:376.0 103:631.0 104:391.0 105:5519.0 106:787.0 107:5509.0 108:1295.0 109:3647.0 110:756.0 111:345.0 113:505.0 115:531.0 116:1137.0 117:6569.0 118:305.0 119:3647.0 120:950.0 121:8129.0 122:1427.0 123:2106.0 124:1420.0 125:580.0 127:508.0 128:723.0 129:69…				0.48	0	7985	66234	8486	18926	3192	13548	7278	5641	3798	33936	2230	29457	1889	7058	9316	957	46900	31749	8370	2773	1491	4596	1116	2975	6351	48821	25804	2087	4311	1794	5434	1748	8387	49815	8881	36230	582	323	1762	8251
146001	206772	123	146001	85:590.0 87:3669.0 88:618.0 90:389.0 91:2000.0 92:2762.0 93:124192.0 94:10020.0 95:49906.0 96:545.0 97:621.0 99:3053.0 100:236.0 101:11424.0 102:1501.0 103:24982.0 104:2457.0 109:787.0 111:95.0 114:233.0 118:451.0 121:1174.0 123:144085.0 124:10757.0 125:50074.0 126:4328.0 127:2122.0 129:2149.0 137:55.0 152:187.0 157:63.0 158:68.0 165:5737.0 166:1001.0 167:2633.0 168:373.0 169:111.0 172:36.0 185:3…				0	0.15	4252	2110	866	1030	1305	577	1530	2089	1707	626	1740	949	1061	2348	897	1043	528	2411	2874	2752	264	2101	1244	626	414	1062	1637	1296	793	3177	1734	758	3274	3982	71	2581	1059	344	2161	1043
135260	564758	275	135260	85:490.0 87:328.0 88:96.0 89:4491.0 91:278.0 98:198.0 100:1674.0 101:923.0 102:806.0 105:121.0 107:78.0 109:62.0 111:97.0 112:244.0 113:345.0 114:322.0 115:427.0 116:503.0 117:1642.0 118:320.0 119:231.0 127:529.0 128:1646.0 130:631.0 132:26.0 133:1406.0 139:61.0 140:42.0 141:85.0 142:651.0 144:775.0 145:466.0 146:345.0 147:1531.0 149:269.0 150:93.0 151:42.0 153:152.0 154:140.0 155:2147.0 156:1295…				0	0.6	146	133	79	51	44	71	120	41	128	129	45	121	81	118	93	78	54	59	46	61	51	80	25	86	63	61	98	70	80	30	41	53	63	129	54	27	46	21	79	44
134336	493891	85	134336	85:163541.0 86:6658.0 87:2704.0 88:1720.0 89:2272.0 91:731.0 92:146.0 93:211.0 94:61.0 95:313.0 99:4458.0 100:733.0 101:5222.0 102:868.0 103:11045.0 104:1238.0 105:734.0 109:67.0 111:325.0 112:378.0 113:1676.0 114:291.0 115:2420.0 116:561.0 119:950.0 125:287.0 129:28912.0 130:2207.0 131:7776.0 132:114.0 133:12413.0 134:376.0 135:675.0 136:104.0 137:80.0 140:73.0 141:1108.0 142:224.0 144:148.0 145…				0.04	0.14	7075	76037	46766	5939	45425	7336	4191	42171	51720	4977	4048	56623	7021	4916	5680	3889	2847	6903	6203	60574	6050	4623	2553	6948	5017	5666	8297	6507	4128	7495	5014	3479	8020	96477	3503	66526	3697	3131	52341	4394
133264	450534	94	133264	87:132.0 93:373.0 94:4408.0 95:348.0 98:551.0 99:809.0 101:133.0 102:161.0 103:58.0 105:56.0 106:153.0 115:139.0 116:389.0 117:98.0 119:121.0 129:34.0 130:53.0 131:153.0 132:175.0 133:407.0 140:72.0 141:364.0 142:225.0 143:225.0 144:31.0 146:114.0 147:64.0 148:135.0 157:24.0 158:70.0 160:110.0 162:47.0 172:99.0 173:30.0 174:32.0 176:96.0 188:32.0 197:23.0 231:12.0 272:48.0 273:16.0 280:15.0 287:2…				0	0.9	666	913	276	553	315	546	499	90	480	418	312	700	655	788	659	448	330	681	612	488	435	373	256	800	420	144	904	319	411	834	561	376	954	160	503	161	343	242	803	417
130599	623643	116	130599	85:159.0 86:115.0 87:57.0 89:80.0 91:40.0 92:9.0 96:37.0 99:40.0 100:410.0 101:104.0 103:67.0 109:36.0 116:7524.0 117:750.0 118:230.0 123:24.0 124:45.0 129:206.0 131:82.0 133:214.0 142:160.0 158:186.0 160:17.0 166:44.0 217:18.0 231:16.0 242:20.0 260:56.0 267:25.0 269:63.0 270:61.0 271:66.0 280:18.0 304:15.0 326:35.0 331:15.0 333:32.0 351:14.0 353:18.0 356:24.0 371:15.0 378:25.0 449:18.0 456:15.0 …				0.34	0	5900	2894	8974	3696	1122	1536	2482	10002	3159	28798	2974	7405	1418	11827	2406	6911	1398	1106	2273	10001	17159	21774	11136	31786	11649	5525	4065	15276	28714	1147	1495	1128	3271	5116	1939	9664	3149	4964	4018	19296
130558	878863	158	130558	86:845.0 87:163.0 88:123.0 91:136.0 95:17.0 96:53.0 100:646.0 102:651.0 104:19.0 105:125.0 108:32.0 111:19.0 112:17.0 115:134.0 116:179.0 117:158.0 118:54.0 123:34.0 124:13.0 128:171.0 129:70.0 130:176.0 133:66.0 135:66.0 140:44.0 142:65.0 143:55.0 147:971.0 154:40.0 158:5893.0 159:680.0 160:255.0 172:51.0 174:1183.0 175:126.0 184:32.0 198:14.0 201:44.0 204:549.0 210:34.0 219:69.0 220:24.0 221:71…				0.2	0	1080	1533	616	605	496	799	732	374	784	506	1423	364	646	4766	1128	260	176	595	1740	266	275	771	354	295	479	793	2140	586	744	900	489	499	829	1224	800	1934	1349	324	1858	641
128047	690038	158	128047	85:231.0 86:482.0 90:57.0 94:28.0 98:76.0 99:131.0 100:67.0 101:274.0 102:589.0 107:53.0 109:56.0 110:84.0 111:53.0 112:89.0 114:56.0 115:195.0 116:211.0 117:1756.0 118:149.0 128:95.0 129:250.0 130:287.0 132:197.0 133:68.0 134:150.0 141:48.0 142:121.0 151:35.0 157:152.0 158:12294.0 159:1863.0 160:695.0 161:60.0 162:25.0 164:18.0 166:54.0 168:38.0 169:87.0 170:99.0 178:13.0 183:26.0 184:29.0 185:2…				0.23	0	23763	3900	15700	14161	12117	18698	22923	13943	22192	2537	3601	841	21170	10080	8586	10378	5461	2562	4436	7879	6570	8750	10651	11767	23067	4741	2076	25635	25235	15292	13430	12032	25309	1211	3060	1894	2575	3392	26345	18036
127847	1015842	91	127847	86:133.0 89:550.0 90:291.0 91:26043.0 92:5464.0 93:11603.0 94:1424.0 95:10063.0 96:420.0 97:1873.0 98:169.0 99:249.0 103:1897.0 104:627.0 105:20562.0 106:2963.0 107:8601.0 108:2615.0 109:4505.0 110:569.0 111:773.0 115:3775.0 116:1676.0 117:8426.0 118:1480.0 119:5301.0 120:4800.0 121:5129.0 122:1080.0 123:1766.0 124:240.0 127:1158.0 128:4608.0 129:7129.0 130:1215.0 131:7087.0 132:1690.0 133:6028.0…				0.47	0	3950	9063	1637	5052	3215	4521	1699	2868	2610	2434	1759	11801	1912	4484	1043	2831	1697	6002	4751	2941	6101	3193	981	6312	3093	7243	4406	5145	3826	1953	1395	2489	1546	3567	1361	19452	488	774	2037	6246
127640	598616	217	127640	85:2196.0 86:310.0 87:2126.0 88:2535.0 89:8665.0 90:704.0 92:81.0 94:287.0 95:681.0 96:269.0 97:869.0 99:2694.0 101:5695.0 102:1316.0 103:40933.0 104:3696.0 105:3927.0 107:83.0 108:22.0 109:423.0 111:2311.0 112:903.0 113:2307.0 114:175.0 115:1720.0 116:1136.0 117:10983.0 118:926.0 119:2990.0 120:333.0 125:648.0 127:1590.0 129:18514.0 130:2928.0 131:3876.0 132:1018.0 133:15474.0 134:2309.0 135:143…				0.11	0.06	5760	1939	5077	3032	1646	1707	2257	1664	1858	1357	2232	2601	4092	1514	1274	3501	1340	1438	1097	1576	1920	1960	1654	3995	3820	1515	1334	4758	4528	3226	1965	2968	8353	2390	660	2977	11976	1288	8333	2591
127320	458232	129	127320	85:1159.0 87:1670.0 88:93.0 89:416.0 90:204.0 91:507.0 92:118.0 93:116.0 94:119.0 95:79.0 97:110.0 98:31.0 99:978.0 101:1263.0 102:2941.0 103:1615.0 104:680.0 105:1007.0 107:238.0 108:65.0 110:107.0 111:48.0 112:23.0 113:70.0 114:659.0 115:3399.0 116:525.0 118:228.0 119:545.0 120:86.0 121:82.0 129:9588.0 130:3842.0 131:2046.0 132:1459.0 133:3255.0 134:697.0 135:325.0 143:127.0 145:852.0 147:17037…				0.56	0	7182	15798	3287	2973	3776	1631	1816	3969	3349	2033	1759	15647	3735	4002	1869	3458	3957	1023	1695	3250	2640	3501	2672	3777	2224	2228	921	6425	4775	8438	5049	4419	7433	18876	1041	14838	1726	6237	9883	2801
126709	444605	174	126709	86:1246.0 88:58.0 99:142.0 100:546.0 107:65.0 113:56.0 114:154.0 115:163.0 119:82.0 124:28.0 126:36.0 128:897.0 129:158.0 131:375.0 132:199.0 133:825.0 134:171.0 137:23.0 142:311.0 144:49.0 147:1423.0 149:54.0 162:417.0 163:49.0 173:32.0 174:5610.0 175:944.0 176:391.0 177:84.0 204:16.0 216:62.0 217:31.0 220:23.0 221:73.0 236:290.0 362:8.0 393:20.0 421:17.0 468:14.0				0.71	0.01	5076	19302	7798	23383	7237	3798	17894	14367	14688	13448	1830	9418	13868	6119	8600	7435	31527	3658	12389	15506	7360	12865	3906	12949	18711	27039	1248	15506	18789	8521	3249	6259	3538	3123	4266	9298	31500	1281	2589	14668
126690	791238	261	126690	85:61.0 86:178.0 87:103.0 88:43.0 91:127.0 94:31.0 95:75.0 97:90.0 99:311.0 101:364.0 103:261.0 104:32.0 105:20.0 106:26.0 111:66.0 113:63.0 115:127.0 116:285.0 118:63.0 119:150.0 120:44.0 122:49.0 126:97.0 129:2727.0 130:39.0 131:603.0 133:534.0 134:68.0 135:55.0 137:11.0 139:40.0 140:53.0 142:103.0 147:325.0 148:477.0 149:173.0 150:41.0 153:27.0 155:72.0 156:334.0 157:154.0 161:61.0 163:82.0 16…				0.13	0	1394	580	283	488	926	662	821	703	691	267	151	325	1090	105	513	196	849	368	441	581	913	341	133	115	1025	414	444	547	476	568	176	156	501	387	231	576	62	99	1269	751
125960	938149	217	125960	85:70.0 89:692.0 100:126.0 101:190.0 102:40.0 103:2714.0 104:190.0 105:108.0 114:392.0 115:61.0 116:63.0 117:431.0 129:1157.0 130:186.0 131:254.0 133:822.0 134:54.0 141:38.0 142:72.0 143:151.0 144:35.0 145:55.0 147:2822.0 148:261.0 149:275.0 154:16.0 157:169.0 158:25.0 159:30.0 163:60.0 169:544.0 170:16.0 171:49.0 172:115.0 173:38.0 174:21.0 179:20.0 183:21.0 189:95.0 191:228.0 193:23.0 203:34.0 …				0.22	0	21578	10285	10991	12176	8475	15560	13045	14818	14795	6513	6089	7773	17442	2696	12816	14884	9916	10916	10049	9066	14321	9782	5587	19368	15160	4223	6168	19326	21840	13077	9651	12131	28032	9476	3324	1513	4181	502	10564	12021
125942	910707	217	125942	85:262.0 86:45.0 87:105.0 88:46.0 89:134.0 90:17.0 94:42.0 95:37.0 96:51.0 97:50.0 98:40.0 99:87.0 101:267.0 102:94.0 103:1532.0 104:89.0 105:44.0 109:60.0 111:109.0 113:272.0 114:54.0 115:92.0 116:53.0 117:475.0 118:27.0 119:84.0 123:32.0 125:28.0 127:82.0 129:1325.0 130:66.0 131:299.0 133:330.0 134:46.0 139:25.0 140:62.0 142:112.0 143:470.0 145:58.0 146:43.0 147:1887.0 148:110.0 154:42.0 155:47…				0.38	0	4316	2402	3582	5514	1624	3357	3275	6592	2355	1704	1446	2628	2161	1022	3121	7589	2026	3169	2570	4208	2389	2674	1654	10013	2662	1111	1260	9481	4329	1228	5763	5523	5567	3411	929	7302	955	175	2885	2705
125897	933563	217	125897	85:2918.0 86:533.0 87:2444.0 88:1950.0 89:24231.0 90:2082.0 91:531.0 94:528.0 95:95.0 96:265.0 97:794.0 98:9.0 99:2686.0 100:3754.0 101:10246.0 102:4056.0 103:152366.0 104:14542.0 105:9294.0 106:530.0 107:237.0 108:205.0 109:2192.0 110:549.0 111:1598.0 112:280.0 113:4712.0 114:7235.0 115:3710.0 116:5264.0 117:28753.0 118:3146.0 119:3616.0 120:68.0 123:40.0 124:423.0 125:350.0 126:967.0 127:2030.0…				0.23	0	8638	2197	4618	4789	1827	2847	5851	3692	4194	1431	3223	1302	3414	5241	12495	3910	1043	1183	3328	2109	2358	4189	2062	5984	3958	3166	616	3485	6942	4374	9077	10760	2167	1383	1706	2291	8147	480	10564	1761
125802	891034	204	125802	85:128.0 86:55.0 87:241.0 88:172.0 89:1092.0 90:81.0 91:84.0 94:58.0 99:68.0 101:1298.0 102:235.0 103:10107.0 104:763.0 105:383.0 111:90.0 113:255.0 114:101.0 115:413.0 116:605.0 117:4206.0 118:405.0 119:364.0 120:62.0 121:61.0 126:54.0 127:256.0 128:61.0 129:11444.0 130:1321.0 131:1687.0 132:167.0 133:2588.0 134:303.0 135:151.0 137:29.0 139:75.0 140:44.0 141:160.0 142:89.0 143:1116.0 144:58.0 14…				0.19	0.08	3869	1144	1237	1111	1853	1813	2516	1241	1516	1019	406	918	3549	434	454	1944	1007	603	3241	1726	3351	646	338	1610	1346	1028	583	1695	5561	1052	6304	2028	3451	1033	232	1867	303	232	6738	489
125788	977394	204	125788	85:169.0 87:493.0 89:135.0 99:226.0 101:1387.0 103:5976.0 104:55.0 105:180.0 113:216.0 114:30.0 116:421.0 117:1633.0 118:18.0 126:69.0 128:67.0 129:6878.0 130:750.0 131:2201.0 132:291.0 133:2262.0 134:32.0 135:74.0 138:17.0 140:50.0 142:140.0 143:997.0 144:24.0 147:8926.0 148:1653.0 149:749.0 154:36.0 155:199.0 157:627.0 161:244.0 165:35.0 167:31.0 169:882.0 171:122.0 172:24.0 174:47.0 175:140.0 …				0.01	0.18	15333	358	1451	1676	885	1078	1771	780	833	296	15505	226	886	1430	1305	692	264	293	455	968	577	800	380	1450	819	1343	487	1348	2688	1289	3032	987	3398	299	550	678	93496	248	2855	612
124454	911230	192	124454	91:600.0 93:82.0 95:155.0 97:92.0 100:255.0 102:158.0 105:261.0 110:49.0 111:44.0 112:32.0 115:321.0 117:266.0 118:120.0 119:221.0 121:105.0 122:40.0 123:49.0 124:22.0 128:223.0 135:249.0 136:27.0 137:20.0 139:43.0 145:32.0 149:397.0 150:88.0 151:748.0 152:123.0 153:29.0 161:424.0 162:94.0 163:223.0 165:210.0 166:76.0 175:121.0 176:66.0 177:1627.0 178:840.0 179:666.0 180:175.0 181:46.0 185:25.0 1…				0.51	0	3569	4951	3317	3534	2467	4322	3947	2564	1851	13067	5126	15076	3861	10133	8851	6393	4137	2805	16626	7864	2361	2484	4329	5701	1757	3939	6022	1034	2138	3547	1144	1752	3841	6397	1317	11103	187	73	4169	3330
122843	693410	212	122843	85:2382.0 86:1016.0 87:1703.0 88:657.0 89:3043.0 90:250.0 92:54.0 93:189.0 94:3340.0 95:530.0 96:5288.0 97:4112.0 98:23533.0 99:2892.0 100:560.0 101:10094.0 102:1523.0 103:11256.0 104:819.0 105:889.0 106:260.0 108:486.0 110:1364.0 111:548.0 112:1169.0 113:654.0 114:727.0 115:2965.0 116:3108.0 117:13176.0 118:1435.0 119:1815.0 120:359.0 121:315.0 122:3420.0 123:297.0 124:988.0 125:448.0 126:531.0 …				0.54	0	12913	8429	12456	14363	4961	15536	17561	19249	9709	6110	4292	7301	11018	2949	14980	17550	7535	14963	10786	11756	10260	12322	8975	25021	9112	3472	3919	26976	11349	15069	548	341	2050	13738	3192	14883	232	102	4919	12867
122469	438527	194	122469	85:220.0 89:115.0 90:181.0 91:759.0 92:303.0 94:284.0 95:419.0 96:340.0 97:942.0 98:764.0 100:1567.0 101:421.0 102:246.0 104:256.0 106:208.0 107:108.0 108:201.0 109:416.0 110:139.0 111:276.0 113:70.0 116:237.0 120:642.0 121:149.0 122:211.0 123:443.0 124:109.0 125:349.0 129:426.0 130:41.0 133:173.0 134:510.0 135:300.0 136:310.0 137:158.0 138:115.0 140:37.0 144:41.0 146:110.0 147:911.0 150:378.0 15…				0.52	0	1425	5907	1107	1393	2679	2598	2211	1264	877	1244	901	6422	1815	3513	2112	1862	1581	2888	1387	2931	2224	1689	1216	4398	915	1737	982	1613	1692	1569	547	626	1947	5496	816	14650	561	293	2470	2443
122151	294155	99	122151	85:146.0 86:5949.0 87:534.0 88:330.0 89:225.0 91:79.0 92:23.0 93:32.0 95:50.0 96:155.0 97:116.0 99:11442.0 100:559.0 102:146.0 103:157.0 105:99.0 106:28.0 126:75.0 132:43.0 146:301.0 168:141.0 170:114.0 180:14.0 188:93.0 316:13.0 318:14.0 319:6.0 324:18.0 366:12.0 374:15.0 380:14.0 387:14.0 403:14.0 413:14.0 426:30.0 432:13.0 433:14.0 499:18.0				0.34	0.01	69668	39151	50929	43306	13318	33571	47581	30311	21159	19517	17122	50296	42953	32322	36782	14586	28221	47530	28849	29247	24026	16696	10348	23272	33024	38422	49071	27568	9415	27516	26970	25974	42992	76742	20644	41230	36112	17681	54355	33748
121404	899939	94	121404	85:612.0 86:362.0 87:380.0 88:237.0 89:702.0 90:153.0 91:16462.0 92:4321.0 93:11614.0 94:5419.0 95:4757.0 96:1419.0 97:1061.0 98:364.0 99:123.0 102:182.0 103:255.0 104:613.0 105:7361.0 106:2391.0 107:4051.0 108:1394.0 109:1040.0 110:226.0 111:332.0 112:102.0 115:668.0 116:1342.0 117:6441.0 118:964.0 119:4684.0 120:1863.0 121:2912.0 122:648.0 123:362.0 124:187.0 125:62.0 128:394.0 129:5220.0 130:9…				0.3	0.28	1280	2626	652	279	630	3250	642	358	828	2411	785	1022	2362	1316	925	652	1604	1238	2478	865	1380	319	406	617	1988	1422	4102	412	1196	970	466	633	886	2435	958	1247	437	909	1042	1644
121384	970174	334	121384	85:283.0 86:408.0 87:603.0 88:733.0 89:4731.0 90:495.0 91:454.0 92:60.0 93:253.0 94:228.0 95:155.0 96:371.0 97:189.0 98:336.0 99:840.0 100:1026.0 101:2067.0 102:835.0 103:18496.0 104:1659.0 105:1371.0 106:475.0 107:218.0 108:255.0 109:201.0 110:372.0 111:395.0 112:394.0 113:396.0 114:621.0 115:1314.0 116:1235.0 117:7103.0 118:850.0 119:865.0 121:304.0 122:70.0 123:119.0 124:243.0 125:92.0 126:118…				0.15	0.01	1713	416	93	70	1894	167	717	1414	1065	315	201	393	876	93	243	426	98	169	843	508	288	3682	206	1260	537	211	362	253	5758	1791	18883	351	433	217	141	286	1104	160	567	161
120990	475227	186	120990	85:180.0 95:71.0 96:1777.0 97:43.0 98:83.0 103:51.0 114:132.0 117:124.0 126:131.0 128:117.0 129:229.0 130:167.0 131:569.0 133:42.0 142:100.0 148:172.0 150:25.0 162:22.0 170:864.0 186:6067.0 187:751.0 188:252.0 189:22.0 233:25.0 277:28.0 278:16.0 279:17.0 280:19.0 281:66.0 282:40.0 288:228.0 289:43.0 293:25.0 294:18.0 297:26.0 298:16.0 303:179.0 305:30.0 312:38.0 328:19.0 340:25.0 352:21.0 363:22.…				0.27	0	5334	9900	5771	6331	1646	7758	8657	2944	2462	3076	2395	2637	3508	5971	4715	3700	2919	2589	8474	3648	2719	2068	1497	2113	5432	1864	10594	7178	2259	3701	3914	2626	4524	4172	4015	2753	1306	818	3562	1629
120562	475084	98	120562	98:6741.0 100:212.0 101:112.0 102:564.0 103:798.0 104:118.0 114:18.0 115:31.0 117:125.0 125:62.0 126:139.0 129:186.0 130:232.0 143:65.0 144:151.0 147:222.0 154:45.0 170:105.0 171:760.0 172:143.0 173:85.0 178:18.0 185:41.0 187:151.0 195:21.0 200:1249.0 201:189.0 208:36.0 213:37.0 215:54.0 217:52.0 224:22.0 225:32.0 228:32.0 230:27.0 231:23.0 236:30.0 238:16.0 248:43.0 250:19.0 252:18.0 258:33.0 26…				0.01	0.49	3748	4860	3679	3774	2518	4946	2384	4273	3609	3881	2700	1703	3562	4119	3827	1492	2815	4349	5968	3697	3105	3756	1719	4413	4032	3388	3840	3752	3869	3415	2216	1956	5776	2355	1794	1781	5116	2002	2206	3799
120526	294844	99	120526	85:65.0 87:130.0 89:44.0 93:21.0 96:102.0 97:37.0 98:194.0 99:5515.0 100:238.0 104:29.0 107:175.0 110:24.0 113:43.0 118:28.0 121:61.0 131:104.0 149:39.0 171:80.0 178:31.0 180:22.0 182:25.0 190:26.0 265:29.0 362:19.0 384:23.0 396:21.0 433:30.0 436:17.0 438:19.0 445:28.0 447:18.0 468:25.0 470:22.0 472:20.0 476:37.0 478:22.0 482:16.0				0.15	0.09	69668	39151	51599	43290	17225	34331	47542	39543	21159	19517	17122	52730	42896	32322	36313	14589	28937	47662	28849	26115	24042	16696	10348	23272	33024	38422	54181	27568	16700	49273	26970	21634	42992	76742	20807	41230	36112	17681	61551	33748
119101	1123952	217	119101	85:732.0 86:201.0 87:376.0 89:391.0 91:2792.0 93:2339.0 94:564.0 95:1692.0 96:237.0 97:396.0 99:178.0 101:2108.0 103:2652.0 104:291.0 105:3117.0 106:124.0 107:2133.0 108:258.0 109:1074.0 111:510.0 112:70.0 113:379.0 114:42.0 115:660.0 116:2402.0 117:6213.0 118:544.0 119:1892.0 120:469.0 121:1590.0 122:266.0 123:329.0 124:120.0 125:76.0 127:817.0 128:484.0 129:4815.0 130:732.0 131:2054.0 132:605.0…				0.56	0.01	5458	71833	9299	10422	7721	46826	3207	9591	7893	2646	13472	81563	3779	1982	7487	3222	5208	5916	18280	40661	15785	6277	5158	10252	4635	5513	18484	5344	1217	2639	4360	6414	11076	19316	2713	54272	12887	696	4735	6996
119092	719346	209	119092	89:486.0 91:425.0 92:152.0 95:129.0 97:530.0 99:29.0 101:179.0 103:128.0 104:67.0 105:343.0 106:78.0 107:76.0 109:68.0 110:130.0 114:42.0 115:321.0 116:252.0 119:469.0 120:86.0 121:157.0 123:116.0 131:379.0 132:83.0 133:1158.0 134:207.0 135:312.0 136:518.0 137:189.0 149:250.0 150:90.0 151:1187.0 152:172.0 153:58.0 161:98.0 162:57.0 163:113.0 164:147.0 165:148.0 166:1518.0 167:207.0 168:45.0 170:3…				0.33	0	69753	367	49770	317	13023	274	56189	822	231	451	6679	513	1222	559	305	31780	140	227	2225	997	108	126	161	555	192	199	1412	1543	1136	1457	27953	15566	29239	190	542	105	301	1540	33436	179
119091	707755	239	119091	85:136.0 89:1236.0 90:186.0 91:637.0 92:274.0 93:259.0 94:40.0 95:204.0 97:175.0 98:48.0 99:101.0 101:389.0 102:240.0 103:364.0 104:57.0 105:417.0 106:79.0 107:238.0 108:95.0 109:113.0 111:112.0 115:232.0 116:848.0 117:625.0 118:185.0 119:264.0 120:91.0 121:396.0 122:24.0 123:147.0 124:41.0 128:77.0 129:121.0 130:284.0 131:248.0 132:81.0 133:377.0 134:142.0 135:444.0 136:408.0 137:362.0 138:34.0 …				0.46	0.01	18151	333	32790	555	2648	365	5932	3304	471	712	1799	330	1404	610	367	12855	155	239	239	662	679	356	245	786	204	239	1049	732	261	1535	4445	7208	2561	241	730	160	55	699	28297	150
119090	703661	132	119090	85:183.0 87:132.0 88:116.0 91:1355.0 92:311.0 93:411.0 94:151.0 95:160.0 97:108.0 98:102.0 99:231.0 101:508.0 103:637.0 104:158.0 105:1242.0 106:374.0 107:446.0 109:143.0 110:83.0 111:151.0 112:67.0 113:117.0 114:80.0 115:891.0 116:553.0 117:5077.0 118:614.0 119:484.0 120:94.0 121:241.0 122:48.0 123:70.0 125:137.0 126:46.0 127:339.0 128:203.0 129:1136.0 130:565.0 131:1556.0 132:4401.0 133:3812.0 …				0.44	0.01	12757	2578	5628	10144	9358	5708	12505	11738	10588	2922	4887	4718	12615	6709	9691	7911	5611	4881	3334	9499	6421	13445	4839	11330	12286	7302	4492	15773	13557	11243	8089	6186	10681	2627	3072	4444	2580	408	8202	12071
119088	457286	117	119088	85:206.0 87:105.0 90:31.0 99:340.0 100:110.0 102:166.0 103:239.0 105:114.0 115:509.0 116:265.0 117:9366.0 118:927.0 121:10.0 129:452.0 131:475.0 132:77.0 133:586.0 135:112.0 136:42.0 137:38.0 141:78.0 143:209.0 144:360.0 145:126.0 146:56.0 147:2235.0 148:736.0 149:244.0 150:16.0 152:29.0 157:131.0 158:12.0 159:39.0 165:28.0 167:17.0 169:49.0 170:26.0 171:724.0 172:172.0 175:280.0 176:61.0 177:66.…				0.66	0	48205	17670	29059	29908	16407	46770	40724	39221	40039	24837	16866	23600	87233	14491	48952	39405	2751	29467	35520	39565	40647	40232	18935	59574	30767	42568	25569	64066	39365	47888	31035	24678	48095	30460	11315	39885	1564	1463	44842	51000
119084	841568	378	119084	85:147.0 87:245.0 88:84.0 89:203.0 96:128.0 97:44.0 99:101.0 100:309.0 101:178.0 102:147.0 103:193.0 105:193.0 111:255.0 112:137.0 113:139.0 114:83.0 115:505.0 116:190.0 117:371.0 118:98.0 120:50.0 124:40.0 128:215.0 129:896.0 130:286.0 131:881.0 132:258.0 133:816.0 134:112.0 136:91.0 141:93.0 142:305.0 143:211.0 145:516.0 146:301.0 147:4567.0 148:528.0 149:371.0 150:84.0 151:70.0 152:64.0 153:10…				0.87	0	10946	3230	3928	21606	18276	11450	22718	22397	30469	15266	8600	9333	34208	1803	20240	17267	13875	9987	21513	22672	18467	26299	14311	31006	31705	13325	5376	33506	16548	10839	7915	7835	14465	4127	8761	9020	204	3737	9665	34991
119023	873486	103	119023	85:1196.0 86:984.0 87:1252.0 88:897.0 89:11086.0 90:889.0 91:655.0 94:448.0 95:879.0 96:13146.0 97:3627.0 98:6149.0 99:1476.0 100:1406.0 101:3508.0 102:1399.0 103:54929.0 104:5536.0 105:2860.0 106:592.0 107:1813.0 108:507.0 109:259.0 110:240.0 111:499.0 112:780.0 113:1463.0 114:1084.0 115:955.0 116:1138.0 117:11584.0 118:1226.0 119:1397.0 120:276.0 121:171.0 122:266.0 123:2227.0 124:287.0 125:248…				0.29	0.78	5277	1305	1853	2120	243	1378	2872	1989	1044	906	3920	1216	1749	339	1567	3987	1133	3244	1846	2084	3548	2197	1882	752	452	826	1900	1553	2607	1405	18052	25878	21155	2349	312	3333	4469	643	19880	2364
118997	654635	209	118997	85:187.0 88:515.0 89:3062.0 90:376.0 91:1828.0 92:272.0 93:398.0 94:190.0 95:326.0 96:431.0 98:108.0 99:355.0 101:430.0 102:119.0 104:540.0 105:1412.0 106:311.0 107:353.0 108:122.0 109:213.0 111:71.0 112:102.0 115:526.0 116:1971.0 117:558.0 118:264.0 119:339.0 121:422.0 122:152.0 123:187.0 124:110.0 125:35.0 126:67.0 128:73.0 132:93.0 133:583.0 134:155.0 135:1234.0 136:736.0 137:672.0 138:187.0 1…				0.78	0.01	118996	3169	191237	6691	32006	2439	55390	15142	2886	10234	4512	3557	7502	5262	3470	44155	1722	129	1754	12198	4545	3488	1371	5609	2270	2843	2721	6954	10832	8172	66750	77763	16680	2556	1971	1178	20459	2471	198264	688
118995	592625	167	118995	88:150.0 93:278.0 94:977.0 95:1213.0 96:68.0 97:164.0 98:465.0 99:286.0 101:355.0 102:49.0 106:50.0 110:240.0 111:233.0 112:277.0 113:120.0 115:145.0 116:999.0 117:607.0 118:44.0 122:47.0 123:50.0 124:287.0 125:126.0 126:254.0 127:326.0 132:368.0 137:165.0 138:156.0 139:168.0 140:65.0 143:23.0 146:71.0 147:606.0 148:107.0 150:37.0 151:311.0 152:347.0 153:2045.0 154:211.0 156:66.0 157:39.0 158:36.…				0.28	0	5013	394	3996	9471	15131	2756	20365	24641	16192	9941	11194	421	20000	3562	4903	9410	14215	10823	3534	17858	27898	10908	12581	10168	22194	4388	1878	15178	14996	26798	22015	19178	6457	424	10475	761	1554	8509	587	20847
118989	606899	132	118989	89:82.0 90:422.0 91:281.0 101:154.0 102:159.0 103:2894.0 104:576.0 105:526.0 106:92.0 115:361.0 116:51.0 117:3252.0 118:269.0 129:280.0 130:4637.0 131:1094.0 132:24435.0 133:2265.0 134:161.0 135:328.0 136:21.0 155:50.0 191:319.0 193:32.0 204:173.0 205:108.0 215:24.0 216:17.0 221:32.0 234:207.0 235:56.0 246:11.0 249:776.0 250:98.0 255:52.0 265:53.0 318:43.0 319:13.0				0.53	0.84	42546	11866	34086	28787	4798	5012	15538	2866	7098	2698	24920	51313	8453	7521	14209	6571	5953	1200	7697	9806	5389	3052	7732	2029	2009	4648	6515	4520	4753	12059	28517	1071	28123	18168	1432	13330	471	14668	9442	2219
118854	299280	104	118854	85:166.0 86:563.0 87:433.0 88:863.0 89:6818.0 90:482.0 91:186.0 96:254.0 100:1635.0 101:327.0 102:1353.0 103:1556.0 104:9261.0 105:943.0 106:382.0 114:351.0 115:370.0 116:3632.0 118:24.0 131:1222.0 133:1731.0 134:116.0 135:102.0 146:309.0 147:5571.0 148:1014.0 151:128.0 158:401.0 166:333.0 168:801.0 169:181.0 174:107.0 176:403.0 177:689.0 188:5078.0 189:760.0 190:299.0 192:26.0 204:2535.0 205:500…				0.75	0.33	2035	2650	2515	2060	1601	1507	2268	2302	2166	1470	1710	3024	3086	1631	1845	2079	813	2302	1294	2277	1714	1621	939	1975	2183	2304	1669	1721	1745	2564	1232	1285	5500	3037	1684	3551	2562	218	4586	2218
118060	763084	380	118060	86:69.0 87:245.0 88:91.0 89:400.0 90:101.0 91:492.0 92:115.0 93:90.0 94:64.0 95:22.0 97:35.0 99:99.0 100:923.0 102:178.0 103:419.0 104:62.0 105:253.0 106:97.0 107:73.0 108:52.0 109:55.0 111:35.0 113:77.0 114:47.0 115:617.0 116:256.0 117:466.0 118:137.0 119:362.0 120:33.0 121:114.0 122:25.0 123:51.0 125:37.0 127:118.0 128:165.0 129:85.0 130:132.0 131:686.0 132:196.0 133:1038.0 134:199.0 135:123.0 …				0.75	0	11473	374	3132	2025	1114	1237	576	1947	756	1121	522	667	3993	244	653	2172	853	579	925	908	494	1280	388	1671	951	578	550	1073	22613	19311	14597	8538	2175	321	835	577	1617	6987	2191	1320
117482	301299	145	117482	85:643.0 87:572.0 88:705.0 91:115.0 97:123.0 98:129.0 99:177.0 101:1060.0 102:322.0 103:9820.0 104:1272.0 106:264.0 107:686.0 108:130.0 115:1339.0 116:265.0 117:1427.0 124:31.0 129:1362.0 130:1334.0 131:2158.0 133:2681.0 134:1234.0 143:203.0 144:306.0 145:19630.0 146:2610.0 147:26370.0 148:4571.0 149:4036.0 150:585.0 155:43.0 156:28.0 158:112.0 159:75.0 160:42.0 172:298.0 173:279.0 174:47.0 175:6…				0.41	0	23274	2498	23266	3291	4734	2159	6088	12684	14088	2763	16714	3027	15510	1699	5422	19111	867	702	927	8598	4131	1089	5385	174	1739	1270	5104	4122	36	11690	1097	3831	111537	2662	1346	1784	10067	1170	71194	599
116942	408976	177	116942	89:1165.0 90:204.0 91:205.0 93:60.0 94:67.0 95:62.0 96:142.0 104:117.0 105:104.0 106:102.0 107:50.0 108:81.0 111:113.0 117:409.0 120:58.0 121:58.0 122:28.0 123:19.0 124:122.0 125:33.0 129:4110.0 130:306.0 136:89.0 137:58.0 139:52.0 141:107.0 143:61.0 145:70.0 148:386.0 149:3800.0 150:350.0 152:11.0 153:24.0 154:23.0 162:31.0 164:58.0 165:21.0 166:38.0 167:33.0 168:14.0 169:31.0 170:55.0 173:67.0 …				0.24	0	2268	4357	3389	2745	980	3478	3207	1932	2121	3424	2121	5658	4826	2119	4656	2717	2432	3508	2300	1692	2492	2492	954	3586	2992	4385	5212	5297	2231	3241	1312	997	2070	5791	1765	4513	1320	2292	4477	2644
115551	429621	194	115551	85:85.0 86:314.0 90:64.0 91:209.0 93:136.0 94:76.0 96:80.0 97:137.0 98:101.0 99:49.0 100:1343.0 101:30.0 105:59.0 106:103.0 107:64.0 108:28.0 109:12.0 120:96.0 132:23.0 138:27.0 140:20.0 145:18.0 146:11.0 149:35.0 150:16.0 152:48.0 153:19.0 158:18.0 160:29.0 162:32.0 164:63.0 168:39.0 173:24.0 178:947.0 179:511.0 180:1238.0 181:144.0 182:68.0 191:29.0 192:207.0 193:115.0 194:4337.0 195:339.0 196:…				0.24	0	1532	3695	909	1048	2576	2832	1560	1133	643	1309	907	6468	1597	3273	1926	1827	1411	2520	1763	2474	2671	1382	611	4720	712	1959	1064	2134	1829	1084	906	561	1923	3706	958	12267	655	508	2603	2349
114501	381827	196	114501	86:1924.0 89:386.0 92:446.0 93:1242.0 94:837.0 95:9352.0 96:1191.0 99:470.0 100:8398.0 108:121.0 109:184.0 113:68.0 121:90.0 122:3052.0 123:360.0 124:257.0 125:3107.0 126:445.0 127:431.0 128:129.0 131:266.0 134:64.0 140:104.0 152:419.0 153:95.0 163:27.0 165:25.0 167:58.0 168:73.0 169:252.0 170:27.0 173:60.0 178:34.0 180:452.0 181:188.0 182:90.0 189:42.0 195:163.0 196:50828.0 197:7532.0 198:1812.0…				0.95	0	17784	124987	14772	27972	41180	67243	29680	19631	12656	34092	17365	123309	34063	50243	40853	35445	19031	52043	28588	76503	61589	29625	20597	100589	22859	30112	20949	37067	37558	18481	8583	6654	37054	70378	29399	294474	7968	9795	47405	57453
114258	1034498	117	114258	87:1142.0 88:220.0 89:680.0 95:33.0 101:740.0 102:93.0 103:1399.0 105:67.0 112:50.0 115:92.0 116:1064.0 117:4404.0 118:338.0 119:207.0 121:30.0 122:41.0 124:20.0 131:154.0 133:216.0 135:68.0 136:23.0 139:42.0 142:37.0 145:53.0 146:48.0 147:336.0 152:36.0 154:19.0 161:617.0 163:53.0 177:52.0 179:22.0 185:35.0 186:22.0 190:18.0 195:48.0 196:35.0 198:18.0 200:18.0 201:27.0 202:18.0 205:54.0 210:37.0…				0.56	0.55	8855	13990	10918	9179	3661	8561	630	4848	6857	6477	4377	12824	6445	8735	4339	4828	4025	3792	11410	4707	7764	4126	2852	8519	9164	9304	4523	8043	7564	9968	4660	5861	11978	16010	3449	11611	4918	2274	14437	8844
114247	558612	116	114247	85:441.0 86:151.0 87:193.0 88:70.0 89:718.0 91:230.0 95:142.0 96:212.0 97:158.0 98:277.0 99:212.0 100:957.0 101:3416.0 102:362.0 103:1031.0 105:213.0 107:550.0 111:241.0 113:165.0 115:194.0 116:6164.0 117:1006.0 118:126.0 119:192.0 126:43.0 127:214.0 128:103.0 129:2551.0 130:250.0 131:1113.0 132:16.0 133:2736.0 134:330.0 135:203.0 137:40.0 140:55.0 142:618.0 143:143.0 144:59.0 145:20.0 146:52.0 1…				0.38	0	2826	2207	7417	5620	6083	1835	5177	3253	4214	3760	2080	2383	4393	1176	4331	670	3179	1413	1514	3594	1438	1794	3571	4005	4181	4724	1591	4110	2539	7078	19259	6774	4199	2744	2177	2072	486	423	2957	2395
114243	579812	116	114243	85:1071.0 87:476.0 88:66.0 89:441.0 93:63.0 95:668.0 96:500.0 97:830.0 98:215.0 99:701.0 101:6803.0 102:638.0 103:2465.0 104:105.0 105:585.0 106:65.0 107:853.0 108:66.0 111:250.0 113:243.0 114:95.0 115:724.0 116:13630.0 118:131.0 119:502.0 123:120.0 125:236.0 126:71.0 127:326.0 129:5576.0 130:844.0 131:3702.0 132:330.0 133:5200.0 134:876.0 135:399.0 137:67.0 141:447.0 142:1670.0 143:527.0 144:125…				0.25	0	3105	2327	1811	2346	4526	3588	1503	1655	2130	2359	1377	3665	1451	3904	1274	2248	1607	1199	1733	1607	1445	5010	2060	1735	2676	1414	1004	3292	2309	2757	7939	799	8713	1416	674	3543	921	5429	7320	1653
112544	1069676	160	112544	85:687.0 89:298.0 95:794.0 97:132.0 99:82.0 100:381.0 101:1196.0 102:114.0 103:230.0 105:425.0 106:61.0 109:193.0 110:16.0 111:169.0 115:195.0 116:590.0 117:779.0 121:14.0 122:18.0 123:190.0 125:35.0 129:2888.0 131:172.0 132:372.0 133:866.0 135:316.0 143:258.0 147:1940.0 152:18.0 155:16.0 157:2840.0 158:138.0 160:3301.0 161:237.0 204:386.0 217:1642.0 218:62.0 235:29.0 239:504.0 246:63.0 247:265.0…				0	0.58	271	346	245	234	66	270	225	122	159	112	98	348	214	244	228	78	89	452	342	317	144	126	106	233	194	315	256	240	175	299	206	234	151	409	69	365	86	27	194	250
112264	385239	183	112264	85:1756.0 86:3785.0 87:724.0 88:526.0 90:132.0 91:143.0 92:82.0 94:46.0 95:95.0 97:736.0 100:708.0 101:312.0 102:704.0 103:330.0 105:28.0 107:142.0 108:68.0 109:79.0 110:441.0 112:120.0 113:1185.0 114:477.0 115:352.0 118:388.0 124:29.0 125:28.0 129:122.0 130:214.0 133:437.0 134:3107.0 135:549.0 136:115.0 138:102.0 139:18.0 140:270.0 142:50.0 143:254.0 144:82.0 145:85.0 146:95.0 147:1255.0 153:71.…				0	0.66	2984	1528	2265	3958	7395	1965	2967	5753	2952	4126	739	1754	5865	1848	1791	1926	9248	1562	1278	4186	9518	4061	1537	5403	5373	4355	968	7017	10998	3714	4440	3676	1498	1477	2498	1055	864	2551	1340	10260
111773	920850	103	111773	86:147.0 88:43.0 89:285.0 91:42.0 98:68.0 101:229.0 102:37.0 103:5483.0 104:426.0 108:78.0 111:49.0 112:56.0 117:769.0 118:31.0 119:128.0 121:49.0 130:46.0 132:47.0 133:529.0 134:83.0 136:13.0 140:22.0 141:17.0 142:44.0 143:10.0 144:51.0 147:3095.0 148:577.0 149:73.0 150:86.0 152:12.0 154:26.0 155:40.0 159:17.0 160:15.0 161:53.0 165:27.0 166:32.0 170:39.0 175:229.0 176:202.0 178:33.0 181:36.0 183…				0.47	0	39774	132739	14336	29841	85629	17497	24191	36996	23854	7903	10644	16491	33484	12999	18360	31699	9026	12427	18722	23149	26814	13211	11507	44239	28473	5241	3302	46447	38860	15552	23448	30502	43544	22400	7863	13007	7416	6747	43723	21722
111732	689146	174	111732	86:1666.0 87:110.0 100:1003.0 102:423.0 115:24.0 116:298.0 118:21.0 129:322.0 130:203.0 142:96.0 143:116.0 160:54.0 171:21.0 174:5420.0 175:772.0 176:567.0 177:40.0 178:16.0 187:14.0 319:15.0 361:13.0 387:14.0 389:132.0 390:28.0 494:18.0				0.14	0	17441	10669	17895	9728	17422	23396	17518	25685	15331	10951	8380	1260	12136	14632	14194	13934	16635	25519	20015	5936	14512	21034	10230	30392	13612	6588	3590	21324	18662	13726	6800	14204	7970	9861	6177	11532	6334	8702	14015	20340
111730	419171	102	111730	86:541.0 87:57.0 88:170.0 89:143.0 98:126.0 99:154.0 100:771.0 102:13441.0 103:1158.0 104:359.0 114:89.0 115:78.0 117:78.0 128:375.0 129:224.0 131:470.0 132:83.0 133:96.0 147:1167.0 156:1968.0 157:140.0 204:54.0 230:50.0 246:18.0 261:58.0 329:17.0				0.23	0.03	6108	15475	5046	2649	1652	3906	1773	11250	2218	4253	1376	17190	5420	2039	4192	1053	3985	14453	1422	1866	2250	2908	737	4807	5584	4005	6583	1626	6201	2130	179478	13817	6641	21835	3166	16194	2615	1941	3704	3661
111263	853451	132	111263	100:37.0 104:18.0 111:446.0 113:60.0 116:1334.0 117:103.0 118:46.0 123:64.0 125:379.0 126:50.0 127:98.0 129:61.0 132:3373.0 133:335.0 134:88.0 141:20.0 145:16.0 146:18.0 147:118.0 151:25.0 155:23.0 156:22.0 178:63.0 180:18.0 187:22.0 189:107.0 194:17.0 200:27.0 214:21.0 224:20.0 229:50.0 230:58.0 292:56.0 340:19.0				0.54	0	2741	15385	2351	8160	22965	3153	3435	5606	3018	2958	982	2578	2226	2066	951	1343	20965	1796	1273	6856	39062	1456	978	1710	14740	9179	2635	3180	5083	5987	13200	8621	3128	1715	1926	32081	721	1471	1108	3941
111162	696139	280	111162	97:56.0 98:43.0 99:51.0 100:177.0 111:120.0 114:30.0 115:41.0 117:123.0 119:67.0 121:31.0 125:54.0 130:122.0 132:142.0 137:39.0 145:41.0 147:133.0 151:16.0 153:9.0 157:8.0 158:80.0 159:25.0 160:112.0 162:17.0 165:56.0 169:26.0 171:32.0 172:84.0 173:82.0 176:22.0 177:21.0 180:41.0 181:69.0 187:10.0 190:186.0 192:348.0 193:87.0 194:31.0 197:11.0 199:28.0 206:92.0 208:87.0 212:11.0 216:33.0 220:47.0…				0	0.14	162	113	120	47	0	265	41	41	74	45	40	99	105	117	158	60	56	90	49	51	63	47	28	1296	71	56	196	74	118	95	51	43	120	168	16	119	110	1618	50	73
110612	715649	172	110612	85:330.0 86:1726.0 87:243.0 88:355.0 94:50.0 96:50.0 98:208.0 99:313.0 100:5409.0 101:653.0 102:1493.0 103:1102.0 109:175.0 110:25.0 111:17.0 112:149.0 113:66.0 114:598.0 115:1470.0 116:2400.0 119:179.0 126:193.0 127:112.0 128:1079.0 129:2249.0 130:738.0 131:1290.0 132:273.0 133:1719.0 134:182.0 135:55.0 137:42.0 140:81.0 141:28.0 142:597.0 143:111.0 144:743.0 145:20.0 146:191.0 147:8879.0 148:12…				0.06	0.24	6035	4020	3298	3439	2008	3252	1308	2353	3021	3352	2485	3125	6911	3087	1030	2358	1495	3887	5160	3117	2523	3639	1321	2676	2812	4512	6499	3110	3492	3788	2438	2168	3231	4938	1053	3202	1241	1587	5012	3377
110433	843303	332	110433	86:503.0 87:246.0 89:216.0 99:189.0 102:200.0 103:775.0 104:52.0 112:43.0 114:211.0 115:44.0 116:97.0 120:145.0 122:63.0 124:19.0 125:15.0 128:164.0 131:1103.0 132:225.0 133:1101.0 134:71.0 135:597.0 136:105.0 139:102.0 141:100.0 143:64.0 147:11244.0 148:2012.0 149:938.0 154:36.0 155:49.0 161:13.0 162:70.0 163:112.0 165:51.0 168:60.0 170:53.0 172:55.0 174:864.0 175:138.0 176:265.0 177:138.0 180:2…				0.25	0	1632	3151	2004	1522	1894	6672	1133	1175	8915	7041	10147	683	1865	12107	2538	1055	4988	152	5987	207	1499	5863	941	4552	3988	7826	8260	1570	6041	1538	2241	2074	2513	12095	6502	3707	904	2147	1274	6680
110418	769401	233	110418	86:190.0 87:56.0 88:104.0 89:580.0 90:139.0 91:299.0 93:113.0 95:165.0 97:233.0 100:50.0 101:57.0 103:456.0 104:309.0 105:182.0 106:29.0 109:27.0 111:76.0 115:567.0 116:500.0 117:349.0 118:52.0 119:92.0 121:28.0 126:32.0 130:305.0 131:238.0 132:153.0 133:164.0 134:150.0 135:159.0 144:30.0 145:97.0 146:94.0 147:647.0 149:277.0 150:50.0 151:41.0 156:74.0 157:9.0 159:419.0 160:257.0 161:195.0 162:22…				0.49	0	40318	9412	19310	50912	41822	13789	40968	63805	42010	22603	23359	21364	29302	2120	18449	27969	41934	10386	27760	78395	43151	39745	25150	44617	70928	33436	7393	68096	41254	88193	44974	40228	46800	9593	13762	6748	120	22	16755	81383
110411	504983	217	110411	86:1243.0 87:758.0 88:304.0 89:7179.0 90:672.0 93:100.0 94:129.0 95:122.0 96:949.0 97:247.0 98:337.0 99:707.0 101:4491.0 102:740.0 103:16591.0 104:1403.0 105:9717.0 106:729.0 107:361.0 109:95.0 110:1939.0 111:385.0 112:548.0 113:561.0 114:207.0 115:1066.0 116:2884.0 117:9139.0 118:665.0 119:1101.0 122:57.0 123:40.0 124:50.0 125:16.0 127:199.0 128:476.0 129:703.0 130:308.0 131:2259.0 132:79.0 133:…				0.39	0	5009	2966	3260	3641	172	450	882	9099	1532	1002	884	156	1616	1216	577	935	1200	155	13879	652	938	19811	1614	506	2766	931	708	157	29382	2720	1607	567	2489	567	637	924	2791	594	380	5247
110372	693728	202	110372	85:45.0 89:384.0 90:326.0 91:112.0 94:24.0 96:45.0 99:54.0 101:263.0 102:128.0 104:75.0 105:81.0 115:100.0 116:105.0 117:770.0 118:119.0 119:96.0 120:79.0 121:22.0 122:103.0 123:43.0 128:361.0 129:172.0 130:368.0 132:81.0 133:140.0 134:111.0 135:38.0 136:25.0 141:33.0 143:455.0 144:177.0 145:126.0 146:285.0 147:1008.0 148:210.0 149:52.0 156:130.0 158:81.0 160:151.0 162:44.0 170:80.0 173:48.0 174:…				0.39	0	7048	955	3757	6051	993	2013	8904	5217	6688	3755	3994	3682	5930	803	2973	4864	5195	1168	4592	5559	3387	5066	3083	3606	8922	427	2893	7407	8156	10402	3833	3060	2381	2013	4905	1649	371	115	2834	7674
110371	711100	174	110371	85:263.0 86:2561.0 87:352.0 88:202.0 89:738.0 91:86.0 93:50.0 94:32.0 95:56.0 96:437.0 97:159.0 98:128.0 99:181.0 101:603.0 102:931.0 103:582.0 107:37.0 109:263.0 111:79.0 112:13.0 114:47.0 115:236.0 116:309.0 117:543.0 118:37.0 119:172.0 124:64.0 126:125.0 128:94.0 129:226.0 130:180.0 131:322.0 132:48.0 133:507.0 134:33.0 135:44.0 137:73.0 144:82.0 147:3767.0 148:544.0 149:311.0 150:93.0 152:17.…				0.18	0	21472	6147	32815	16937	8130	3101	3825	7981	8619	1660	2468	2419	3600	3214	2277	5165	1695	2895	5673	20401	1409	8577	6014	12349	4179	4908	7823	8445	8171	2217	1962	5394	8774	1629	2791	4394	1959	1632	46722	2639
110370	775159	306	110370	87:164.0 88:103.0 89:553.0 90:89.0 100:84.0 101:169.0 102:125.0 103:288.0 104:53.0 105:86.0 115:698.0 116:467.0 120:88.0 127:101.0 128:172.0 130:556.0 131:216.0 132:280.0 133:517.0 134:169.0 135:69.0 136:22.0 137:58.0 138:98.0 140:18.0 141:143.0 143:194.0 144:71.0 145:36.0 147:4337.0 148:798.0 149:410.0 150:91.0 151:49.0 154:208.0 155:142.0 157:134.0 158:73.0 159:974.0 160:302.0 161:133.0 162:87.…				0.54	0.05	331179	45275	132356	311677	170896	91280	422809	230838	316085	197263	133899	152332	397202	27617	225131	169013	163535	64461	235220	307805	165816	320506	131275	240695	292700	270847	73298	366742	357904	469998	304253	199182	181302	68532	116168	92774	362	51	124428	369652
110368	685643	292	110368	87:138.0 88:79.0 89:388.0 90:258.0 92:82.0 94:41.0 99:52.0 101:242.0 102:113.0 104:68.0 105:351.0 106:111.0 107:152.0 115:421.0 116:327.0 118:107.0 119:56.0 121:175.0 122:12.0 130:359.0 131:642.0 133:831.0 134:217.0 135:66.0 138:22.0 142:346.0 143:63.0 144:177.0 145:131.0 146:178.0 147:8705.0 148:1391.0 149:1359.0 154:121.0 155:67.0 160:87.0 162:131.0 163:81.0 169:19.0 172:299.0 174:288.0 175:134…				0.46	0	6917	6850	2721	503	570	4755	3811	6334	2800	6240	2057	4933	5272	1606	408	3565	5484	815	5654	7659	1765	6564	1683	428	5941	4355	2144	5534	14600	7837	7415	3656	4205	2449	1074	5731	89	88	3352	6252
110359	674032	174	110359	85:349.0 86:2742.0 88:215.0 89:495.0 92:117.0 96:95.0 98:155.0 99:290.0 100:1574.0 101:233.0 102:883.0 103:710.0 104:84.0 110:60.0 111:80.0 113:116.0 114:118.0 116:300.0 125:67.0 129:413.0 130:482.0 131:620.0 133:667.0 134:63.0 135:44.0 136:23.0 138:20.0 140:55.0 143:329.0 146:134.0 147:1104.0 152:70.0 158:552.0 159:25.0 160:521.0 161:109.0 162:22.0 163:17.0 169:76.0 170:47.0 171:92.0 172:160.0 1…				0.65	0	14018	14110	6745	9102	7474	2848	6181	2879	2449	3620	7423	3424	4558	10923	7473	3493	12131	4007	2553	1191	5151	5384	4236	11890	5112	4751	5184	4720	11026	5064	4786	4529	13415	4254	5662	8423	8845	2675	6655	8852
110357	714923	394	110357	85:408.0 86:981.0 87:1294.0 88:1502.0 89:1632.0 90:580.0 91:1099.0 92:142.0 93:603.0 94:193.0 96:145.0 99:1334.0 100:2482.0 101:2856.0 102:2027.0 103:2502.0 104:648.0 105:1954.0 106:350.0 107:267.0 108:163.0 109:409.0 110:116.0 112:89.0 113:411.0 114:382.0 115:3798.0 116:5054.0 119:1641.0 120:329.0 121:492.0 122:46.0 123:127.0 124:146.0 125:146.0 126:35.0 127:443.0 128:695.0 130:2270.0 131:7516.0…				0.51	0	6953	657	1841	2865	1333	3975	3599	3145	2560	5004	1057	2038	5887	936	3012	2506	2560	974	6105	2674	1267	3715	856	4839	3609	3695	1718	3140	16734	5279	7094	2314	2299	186	1993	819	27	27	2417	4526
110346	763505	174	110346	85:119.0 86:1903.0 87:217.0 88:116.0 93:27.0 94:61.0 95:80.0 96:49.0 97:46.0 99:85.0 100:853.0 101:112.0 102:143.0 103:73.0 106:45.0 111:29.0 112:57.0 113:77.0 114:58.0 115:109.0 116:63.0 117:24.0 118:25.0 119:21.0 122:23.0 124:36.0 125:47.0 126:78.0 127:69.0 128:144.0 130:357.0 131:276.0 132:36.0 133:68.0 136:14.0 137:55.0 138:45.0 139:56.0 140:91.0 141:87.0 142:180.0 144:62.0 146:191.0 147:369.…				0.13	0.01	2150	2206	3495	2172	611	4097	1930	2297	2132	3199	3303	2535	1383	2520	5853	3636	1043	1309	6829	2884	3865	4056	2803	5336	3688	4674	1845	3941	5458	4812	3479	2163	4369	2400	2354	1727	653	675	4254	6164
110321	532288	203	110321	86:586.0 88:140.0 89:12452.0 90:1814.0 91:1321.0 99:1097.0 102:389.0 104:68.0 105:149.0 108:144.0 113:7512.0 114:1371.0 116:2022.0 118:161.0 120:228.0 121:205.0 122:89.0 127:205.0 130:750.0 131:986.0 137:29.0 138:101.0 142:256.0 144:1049.0 145:286.0 146:1125.0 153:64.0 155:2411.0 157:826.0 160:284.0 161:579.0 162:98.0 163:126.0 167:58.0 169:84.0 172:5418.0 173:825.0 174:5841.0 175:702.0 176:237.0…				0	0.78	345	2330	585	1089	234	34	522	104	739	1855	83	1253	497	2417	775	96	1372	334	796	401	321	82	37	89	1428	514	2314	408	89	56	255	271	375	1144	648	985	2645	77	300	45
110283	922215	205	110283	85:1442.0 86:168.0 87:264.0 88:279.0 89:1926.0 90:118.0 91:618.0 92:69.0 93:576.0 94:389.0 95:2610.0 96:1111.0 97:4090.0 98:540.0 99:458.0 100:71.0 101:3161.0 102:289.0 103:5829.0 104:545.0 105:825.0 106:83.0 107:142.0 108:347.0 109:1191.0 110:692.0 111:1640.0 112:168.0 113:218.0 115:922.0 116:1947.0 117:11490.0 118:1050.0 119:913.0 120:120.0 121:621.0 122:224.0 123:777.0 124:419.0 125:518.0 126:…				0.27	0	6314	11498	4742	3768	5418	3033	3078	2686	1874	2230	1062	2368	3840	1969	1378	2963	4675	11329	2360	2920	4628	3636	1004	3871	4573	2408	4805	3139	6920	1348	3081	1667	5539	2112	1140	3152	540	2960	1856	3476
110268	828621	98	110268	85:6222.0 86:111.0 98:3384.0 100:27.0 111:30.0 112:109.0 140:202.0 154:188.0 168:34.0 338:12.0 340:14.0				0	0.64	918	227	1402	582	379	601	617	362	189	349	311	119	432	362	236	197	162	210	871	637	306	235	245	182	384	20606	522	377	313	885	896	1035	776	323	126	181	117	140	899	428
110168	520900	271	110168	85:1513.0 86:1183.0 87:1391.0 88:218.0 89:885.0 90:75.0 93:90.0 95:191.0 96:344.0 98:199.0 101:1614.0 102:609.0 103:13738.0 104:1175.0 105:876.0 106:83.0 107:72.0 108:32.0 109:1217.0 110:251.0 111:111.0 112:1984.0 117:2741.0 119:118.0 120:98.0 123:75.0 124:318.0 125:95.0 126:385.0 127:426.0 129:1313.0 133:2655.0 134:257.0 135:289.0 136:34.0 138:29.0 139:100.0 142:575.0 149:1571.0 150:151.0 151:43…				0.16	0	708	210	846	432	78	492	405	229	720	387	312	71	777	565	621	671	282	206	215	30	558	258	135	991	699	219	708	34	1074	232	1089	593	837	235	309	78	76	44	289	643
110134	596521	158	110134	85:439.0 86:1191.0 87:90.0 89:267.0 90:34.0 94:137.0 95:475.0 96:129.0 98:665.0 100:1583.0 102:2175.0 110:35.0 112:146.0 113:235.0 114:333.0 115:82.0 116:406.0 119:90.0 121:460.0 123:54.0 126:148.0 127:44.0 128:176.0 130:211.0 131:154.0 134:29.0 135:33.0 137:73.0 139:65.0 140:123.0 144:56.0 146:67.0 153:35.0 154:97.0 155:191.0 156:46.0 158:11165.0 159:1258.0 160:664.0 161:25.0 163:44.0 166:261.0 …				0.13	0	1016	1963	353	626	710	1626	1140	551	925	842	951	904	510	2744	1048	358	1405	1518	2088	291	865	901	544	574	1107	631	3351	635	1252	700	830	446	2116	972	761	1393	728	662	426	785
110123	708131	218	110123	85:729.0 86:4555.0 87:2784.0 88:741.0 90:285.0 93:63.0 94:497.0 96:287.0 97:486.0 98:518.0 99:1161.0 100:5657.0 101:4752.0 102:3623.0 104:183.0 105:189.0 106:75.0 107:68.0 108:98.0 109:155.0 110:359.0 111:232.0 112:497.0 113:59.0 114:2386.0 115:3306.0 116:2537.0 117:21320.0 118:2629.0 119:1390.0 120:129.0 121:200.0 124:170.0 125:182.0 126:490.0 127:643.0 128:6866.0 129:4579.0 130:7303.0 131:3135.…				0.29	0	3117	1683	1378	1300	2287	988	1225	1185	1611	786	1266	400	1382	6616	1014	838	266	454	1500	598	727	1678	333	653	1140	359	2234	814	1839	879	637	523	2728	473	621	853	1910	4041	3089	567
110031	743817	174	110031	85:297.0 86:5990.0 87:466.0 88:226.0 89:374.0 90:85.0 95:22.0 96:55.0 98:429.0 99:458.0 100:3314.0 101:786.0 102:350.0 103:1978.0 104:61.0 105:266.0 106:77.0 107:39.0 108:19.0 109:79.0 110:218.0 111:52.0 112:444.0 113:471.0 114:784.0 115:1356.0 117:775.0 118:78.0 119:161.0 120:64.0 125:130.0 126:270.0 127:289.0 128:470.0 129:331.0 130:1009.0 131:1351.0 132:104.0 133:999.0 134:115.0 135:72.0 137:6…				0.16	0	4162	1739	3320	4408	1763	3387	3138	5191	3974	1796	1490	3425	3313	1408	4106	7298	1474	1517	4900	3097	1170	3144	1699	7121	3692	823	1219	18243	8936	3392	2569	18752	5235	1647	3091	4958	186	274	4211	2268
110013	823823	117	110013	86:5239.0 87:624.0 88:109.0 89:2311.0 90:192.0 91:150.0 93:151.0 94:131.0 95:140.0 96:30.0 98:214.0 99:273.0 100:2601.0 101:1397.0 102:1256.0 103:8399.0 104:616.0 105:468.0 107:144.0 108:100.0 112:428.0 113:447.0 114:454.0 115:1048.0 116:1237.0 117:20148.0 118:1690.0 119:840.0 120:27.0 122:48.0 123:39.0 124:65.0 127:172.0 128:1071.0 129:2336.0 130:1264.0 131:2376.0 132:562.0 133:2715.0 134:304.0 …				0.1	0.16	4793	2915	17683	2484	1817	2237	2778	2400	1779	1688	1353	2123	2898	2638	2120	3483	1163	2516	1981	2302	2222	2009	1102	2002	3684	3921	3455	2724	1879	2100	3681	2102	1551	3710	1438	3377	1364	164	9583	2201
110008	983135	174	110008	85:1475.0 86:13278.0 87:1643.0 88:1267.0 89:6896.0 90:603.0 91:403.0 92:123.0 93:308.0 94:1728.0 95:1019.0 96:12279.0 97:1548.0 98:1247.0 99:633.0 100:9059.0 101:3188.0 102:4684.0 103:38597.0 104:3628.0 105:1475.0 106:407.0 107:317.0 108:242.0 109:178.0 110:209.0 111:129.0 112:2323.0 113:974.0 114:1440.0 115:889.0 116:3799.0 117:11926.0 118:1536.0 119:851.0 120:263.0 121:344.0 122:117.0 123:871.0…				0.03	0.15	1413	216	381	187	980	263	1126	306	1740	115	551	81	1	184	877	478	317	156	1016	804	110	118	321	194	224	282	145	53	213	167	12	317	469	467	257	1029	4955	63	3001	80
110001	567979	116	110001	86:1387.0 87:495.0 90:10.0 91:135.0 93:237.0 98:580.0 99:2317.0 100:4852.0 101:256.0 104:39.0 111:65.0 112:224.0 113:343.0 114:980.0 115:775.0 116:84509.0 117:9770.0 118:7457.0 119:5.0 120:86.0 125:174.0 127:108.0 128:1446.0 130:1101.0 131:231.0 132:238.0 142:277.0 143:1847.0 144:709.0 145:75.0 151:46.0 152:12.0 155:100.0 157:48.0 158:29.0 172:399.0 188:290.0 193:19.0 195:28.0 197:55.0 201:24.0 2…				0.16	0	3151	5691	1726	2444	745	2011	2094	565	2650	1518	2008	986	1289	17603	1525	988	1027	1024	2716	928	1325	2098	780	1287	2360	1072	4991	1060	3851	1518	1838	1214	5220	1260	2535	1978	11431	3149	3513	1528
109997	618393	103	109997	85:119.0 86:349.0 89:1222.0 90:76.0 100:280.0 101:104.0 102:80.0 103:8158.0 104:549.0 105:491.0 113:394.0 117:683.0 127:257.0 129:550.0 131:291.0 133:885.0 134:123.0 145:60.0 147:2913.0 148:202.0 149:135.0 157:92.0 163:81.0 189:357.0 190:58.0 191:44.0 205:161.0 206:30.0 217:2269.0 218:360.0 219:114.0 230:32.0 231:47.0 232:13.0 233:18.0 241:13.0 256:12.0 257:24.0 267:12.0 277:101.0 287:18.0 307:43…				0.18	0	7604	4276	3880	4327	2735	3472	4149	2193	2650	2948	1940	3565	3902	3159	3138	5099	2100	2358	3454	4003	3303	2541	758	5496	5023	3383	4022	5185	7356	1090	5251	4871	11954	4768	1814	3884	3910	3126	10239	2223
109397	687079	204	109397	85:1369.0 86:439.0 87:1071.0 88:474.0 89:2343.0 90:261.0 91:384.0 92:56.0 95:491.0 96:105.0 97:529.0 98:244.0 99:1280.0 100:294.0 101:6795.0 102:951.0 103:5731.0 104:539.0 105:665.0 106:60.0 107:81.0 109:80.0 111:994.0 112:201.0 113:731.0 114:200.0 115:1125.0 116:7526.0 117:6748.0 118:975.0 119:7955.0 120:761.0 121:367.0 122:39.0 123:220.0 124:73.0 125:279.0 126:134.0 127:557.0 128:147.0 129:8946…				0.24	0.06	5244	78176	1186	4126	4104	15610	1674	1696	1960	1458	3194	17735	1726	12142	5104	1499	604	2543	4557	2809	1693	6453	1955	2584	2034	6327	11944	2504	3617	2941	1984	1376	2615	13695	2203	54778	1931	2842	1495	844
109386	542775	204	109386	85:154.0 86:147.0 89:833.0 91:127.0 94:33.0 95:40.0 98:183.0 99:112.0 100:268.0 101:919.0 102:125.0 103:4123.0 104:411.0 105:159.0 110:296.0 113:77.0 114:97.0 115:131.0 116:352.0 117:3335.0 118:304.0 119:258.0 129:917.0 130:319.0 131:918.0 132:80.0 133:1729.0 134:292.0 144:52.0 147:5348.0 148:1055.0 149:274.0 151:36.0 157:297.0 158:223.0 159:40.0 163:57.0 168:35.0 172:786.0 173:181.0 175:93.0 177…				0.2	0.04	37346	3111	20798	21859	1841	5333	21144	8140	9063	30912	4658	15037	16004	8995	7544	10547	9429	3408	4344	14572	6200	9622	4343	11871	11928	13813	6769	9751	20530	7729	7646	5835	19796	21893	4979	5629	3226	1207	25904	5573
108309	467443	117	108309	87:178.0 88:92.0 89:1523.0 90:113.0 91:46.0 94:46.0 95:32.0 96:272.0 97:26.0 99:62.0 100:103.0 101:441.0 102:163.0 103:1180.0 104:84.0 105:138.0 113:45.0 114:705.0 115:227.0 116:108.0 117:4021.0 118:329.0 119:359.0 120:48.0 128:57.0 129:242.0 130:75.0 131:403.0 132:78.0 133:1388.0 134:183.0 135:117.0 137:19.0 138:15.0 142:23.0 143:127.0 144:969.0 145:144.0 146:54.0 147:6383.0 148:1069.0 149:498.0…				0.54	0.05	7881	11907	17458	6670	7150	781	5483	3827	3506	1094	2786	2880	4507	1722	346	3435	496	78655	6123	5773	963	1550	984	1725	722	1015	1696	2656	3853	5078	3386	5189	18040	4340	1793	2383	3797	1517	9125	2814
106482	772969	128	106482	85:1837.0 86:2306.0 87:2099.0 88:5423.0 89:1045.0 90:664.0 91:1108.0 92:224.0 93:379.0 94:143.0 95:300.0 96:314.0 97:448.0 98:1652.0 99:1282.0 100:26445.0 101:5270.0 102:2664.0 103:4984.0 104:630.0 105:1442.0 106:425.0 107:512.0 108:115.0 109:3691.0 110:490.0 111:1768.0 112:1727.0 113:2271.0 114:5293.0 115:4795.0 116:5273.0 117:3748.0 118:1046.0 119:1716.0 120:345.0 121:581.0 122:82.0 123:243.0 1…				0	0.73	4206	602	622	760	776	1462	4982	2859	4037	2422	1814	1932	16274	3168	2947	2228	1813	1010	7665	3565	1993	8887	1634	2826	3458	3443	9944	4320	4267	5851	3485	360	2050	96	395	2372	1249	129	497	4255
106387	825293	204	106387	85:705.0 86:213.0 87:574.0 88:422.0 89:1150.0 90:82.0 92:81.0 93:55.0 95:229.0 97:128.0 98:63.0 99:623.0 101:5694.0 102:870.0 103:22310.0 104:2039.0 105:1028.0 111:409.0 113:352.0 114:43.0 115:924.0 116:2252.0 117:3830.0 118:472.0 119:589.0 120:91.0 123:135.0 125:99.0 127:136.0 128:124.0 129:8186.0 130:1090.0 131:4619.0 132:765.0 133:6261.0 134:861.0 135:639.0 136:35.0 141:298.0 142:251.0 143:421…				0.23	0	1569	714	3879	1207	456	1106	2706	874	3107	781	2614	1469	1789	1129	1019	925	1190	647	1121	851	1533	357	662	1496	820	1125	522	825	2029	2540	1023	884	1385	1087	1970	1238	1521	297	1076	327
106353	192179	97	106353	88:145.0 91:1286.0 93:1024.0 94:224.0 95:1402.0 96:6312.0 97:39153.0 98:11619.0 99:731.0 102:89.0 107:295.0 109:39.0 123:95.0 131:175.0 132:165.0 135:88.0 137:50.0 139:177.0 140:80.0 150:162.0 153:57.0 154:4008.0 155:458.0 164:31.0 184:38.0 186:34.0 201:27.0 293:16.0 296:14.0 298:17.0 330:6.0 334:16.0 360:24.0 363:20.0 366:17.0 372:13.0 374:15.0 381:21.0 393:18.0 394:22.0 396:13.0 401:19.0 404:17…				0.32	0.11	12696	8138	31480	6961	16277	9582	4085	6343	5899	11552	32413	20060	31773	7327	488	22850	374	9027	87341	8590	6003	31547	13688	18244	4869	3992	36863	3588	9729	107604	4519	5309	8294	13364	17660	8706	5947	10224	26397	2232
106344	952641	201	106344	85:1545.0 86:388.0 87:774.0 88:496.0 90:261.0 96:348.0 97:3473.0 98:1786.0 99:225.0 100:353.0 101:4346.0 102:502.0 103:2144.0 111:1366.0 112:571.0 113:194.0 114:149.0 115:232.0 116:1593.0 117:2085.0 118:387.0 125:490.0 126:147.0 128:79.0 130:1019.0 131:688.0 132:730.0 133:751.0 135:427.0 137:188.0 138:59.0 139:290.0 140:45.0 141:103.0 145:879.0 146:341.0 147:5419.0 148:1138.0 151:367.0 152:134.0 …				0.38	0	26622	5262	6852	10442	1631	7525	1683	2782	9819	34132	7899	2885	84149	704	3209	260	677	525	11000	4388	1509	37580	3022	4223	9524	958	13029	6987	25755	3162	3521	6808	1969	11350	4493	534	5818	617	765	4874
106331	1149892	169	106331	88:121.0 89:336.0 90:81.0 97:184.0 99:289.0 101:551.0 102:231.0 103:5307.0 104:314.0 105:229.0 109:526.0 110:78.0 111:85.0 112:56.0 113:160.0 115:253.0 116:270.0 117:1778.0 118:212.0 127:56.0 129:4089.0 130:648.0 131:693.0 132:129.0 133:1504.0 135:60.0 139:59.0 141:92.0 142:227.0 143:968.0 144:68.0 145:408.0 147:3424.0 148:351.0 149:829.0 150:62.0 152:25.0 155:379.0 156:129.0 157:675.0 158:235.0 …				0.23	0	400	317	861	1126	118	93	176	491	302	79	907	164	273	161	284	378	112	579	559	358	75	282	109	0	614	134	188	602	78	137	493	842	1239	143	308	457	1473	1365	1822	91
106213	795823	174	106213	85:62.0 86:1422.0 87:46.0 95:14.0 99:53.0 100:531.0 101:69.0 102:33.0 111:22.0 112:53.0 113:28.0 114:56.0 128:44.0 130:71.0 131:116.0 132:31.0 133:41.0 147:121.0 153:462.0 154:881.0 155:28.0 156:62.0 158:45.0 172:56.0 174:4275.0 175:419.0 176:186.0 241:244.0 257:75.0 311:441.0 312:75.0 409:155.0 410:26.0 472:107.0				0.14	0	1061	1175	1155	1002	953	1243	1057	1461	2995	762	1285	1157	721	2379	2008	1203	302	7760	1187	566	564	1638	818	1125	1429	706	957	1336	2263	1727	1561	929	2881	4651	863	900	4387	236	2552	709
105370	1220182	204	105370	85:110.0 86:33.0 87:92.0 89:368.0 91:40.0 95:36.0 97:59.0 98:37.0 99:116.0 100:41.0 101:441.0 102:116.0 103:3244.0 104:289.0 105:163.0 106:50.0 107:21.0 108:18.0 109:107.0 111:118.0 113:137.0 114:49.0 115:144.0 116:234.0 117:527.0 118:35.0 119:74.0 120:44.0 121:23.0 123:35.0 125:30.0 127:115.0 128:28.0 129:4363.0 130:418.0 131:510.0 132:61.0 133:3629.0 134:303.0 135:164.0 136:57.0 137:19.0 139:42…				0.14	0	2974	821	719	1771	378	599	712	4474	860	358	3967	1654	884	820	769	1439	2944	243	549	278	1043	359	318	245	276	1409	6755	410	773	1019	1128	3927	2315	485	275	617	8636	463	1604	301
105214	766491	290	105214	93:48.0 102:71.0 119:55.0 130:67.0 131:152.0 142:42.0 144:60.0 145:151.0 148:295.0 156:215.0 158:57.0 159:42.0 160:38.0 170:32.0 172:69.0 173:25.0 174:53.0 182:21.0 184:60.0 186:60.0 188:45.0 200:76.0 202:1109.0 203:240.0 205:101.0 214:31.0 216:233.0 217:59.0 246:15.0 251:22.0 256:14.0 260:16.0 262:21.0 265:19.0 274:89.0 275:48.0 276:87.0 288:87.0 289:108.0 290:2926.0 291:1008.0 292:286.0 293:67.…				0.57	0.16	288380	36630	120458	327623	161313	70079	323898	260790	288497	159089	117034	112535	347159	26355	196065	159518	132887	38201	163260	309316	163589	265047	129207	272475	286223	200682	53641	324008	384137	381260	293745	214867	200972	62195	95749	96393	167	218	133829	317991
105210	813379	378	105210	88:105.0 100:154.0 115:72.0 131:241.0 132:99.0 133:89.0 145:99.0 147:588.0 159:115.0 160:29.0 172:35.0 174:215.0 186:50.0 188:88.0 189:89.0 190:56.0 193:44.0 200:73.0 202:157.0 214:20.0 215:88.0 216:278.0 218:339.0 219:37.0 220:39.0 221:55.0 222:30.0 228:25.0 230:59.0 231:43.0 232:74.0 233:19.0 236:15.0 244:135.0 246:52.0 248:15.0 252:18.0 260:71.0 262:27.0 272:30.0 273:16.0 274:198.0 275:70.0 27…				0.51	0.1	28701	5480	13665	43494	27664	20164	47825	34874	39378	27036	15318	13788	47957	3225	42203	18791	21546	9699	27354	33652	23122	38749	20949	43816	40805	27079	5229	35649	65776	47907	48078	22093	41678	10534	14499	14894	42	19	15599	62684
105141	887929	319	105141	86:103.0 89:550.0 92:87.0 93:98.0 94:53.0 95:144.0 97:526.0 101:641.0 103:5768.0 104:551.0 105:233.0 108:152.0 109:177.0 110:120.0 111:178.0 113:27.0 116:152.0 117:3020.0 118:303.0 119:220.0 120:32.0 122:34.0 123:92.0 124:72.0 129:1961.0 130:479.0 131:699.0 133:1515.0 134:84.0 135:174.0 138:48.0 139:99.0 140:55.0 142:60.0 143:679.0 145:40.0 147:7849.0 148:1337.0 149:853.0 150:63.0 153:12.0 154:48…				0.15	0	4963	566	1531	823	1915	281	308	3773	2652	1812	2852	2134	5099	651	735	4886	62	184	307	4670	931	944	1629	2276	2679	416	2168	2298	5373	5281	3639	3739	8277	104	1892	402	292	143	4227	110
105113	1060033	223	105113	86:54.0 90:41.0 91:866.0 92:69.0 93:678.0 94:104.0 95:579.0 98:46.0 99:80.0 102:139.0 105:419.0 106:57.0 107:462.0 109:586.0 111:53.0 113:58.0 115:215.0 117:278.0 119:323.0 120:72.0 121:370.0 122:99.0 123:194.0 124:62.0 128:100.0 130:120.0 132:78.0 133:119.0 135:345.0 136:40.0 137:75.0 141:57.0 142:103.0 143:91.0 144:100.0 145:188.0 147:898.0 149:318.0 150:70.0 151:76.0 155:62.0 156:29.0 157:46.0…				0.13	0	352	2117	972	1725	460	1218	333	983	785	1455	1138	1623	935	1331	977	606	172	1442	1772	1520	297	1290	466	1284	183	2409	2183	1700	170	1444	350	603	518	1424	728	2062	158	81	853	2612
104414	844168	331	104414	85:3560.0 86:417.0 87:764.0 88:165.0 89:631.0 90:38.0 91:2938.0 92:435.0 93:1516.0 95:2506.0 96:506.0 97:1518.0 98:209.0 99:1251.0 100:224.0 101:2075.0 102:322.0 103:2638.0 104:297.0 105:1504.0 106:172.0 107:1330.0 108:323.0 109:2546.0 110:211.0 111:425.0 112:190.0 113:466.0 115:906.0 116:1315.0 117:3584.0 118:419.0 119:559.0 120:40.0 121:536.0 122:93.0 123:2808.0 124:329.0 125:314.0 126:124.0 12…				0.92	0.03	1534	7310	3922	13530	14940	14175	3561	11446	24026	14712	28074	20884	4346	35354	8798	7294	11744	2974	12710	1292	7630	11291	9711	2689	5780	17614	20980	2143	2257	1097	924	3049	2123	34555	16008	6582	2661	6373	2515	11343
104404	847528	215	104404	85:3381.0 86:505.0 88:416.0 89:1007.0 90:160.0 91:3927.0 92:368.0 93:1852.0 94:392.0 95:2641.0 96:467.0 97:2777.0 98:723.0 99:1477.0 101:2664.0 102:367.0 103:8991.0 104:876.0 105:1458.0 106:91.0 107:1324.0 108:174.0 109:2365.0 110:512.0 111:1184.0 112:72.0 113:547.0 114:21.0 115:1267.0 116:2343.0 117:5548.0 118:620.0 119:191.0 121:708.0 122:183.0 123:2018.0 124:407.0 125:513.0 127:469.0 128:199.0…				0.78	0	4768	44757	1689	7948	18678	37492	9666	6574	38011	22741	45004	23600	15667	19259	36909	12885	13566	17071	59888	15362	27140	53070	14489	9495	23403	49102	239473	7820	10542	4086	3544	2307	3212	63998	9717	23510	4253	25231	6838	16477
104403	786516	174	104403	85:116.0 86:8625.0 87:809.0 88:270.0 100:3865.0 101:536.0 102:530.0 104:43.0 105:266.0 113:173.0 114:132.0 115:361.0 116:365.0 120:76.0 128:147.0 130:1754.0 134:204.0 136:83.0 144:296.0 146:253.0 154:74.0 156:166.0 158:306.0 159:80.0 160:183.0 161:74.0 163:41.0 168:29.0 169:105.0 170:134.0 172:492.0 173:370.0 174:22891.0 175:3764.0 176:1798.0 177:165.0 178:59.0 181:26.0 184:167.0 186:365.0 187:11…				0.81	0	80774	47158	27712	45302	38224	38075	108024	74947	42175	24073	8960	14469	62996	4302	29433	25365	30570	35098	17589	44846	31883	24698	39531	38746	43600	22435	7524	34191	49187	74093	32670	30369	77944	23922	19580	24862	4263	10276	85194	34028
104400	851637	242	104400	85:181.0 86:87.0 87:241.0 88:45.0 89:375.0 90:47.0 91:1883.0 92:262.0 93:295.0 96:221.0 99:202.0 102:157.0 103:1029.0 104:297.0 105:1146.0 106:74.0 107:274.0 113:28.0 115:960.0 118:511.0 119:1471.0 120:447.0 121:72.0 122:28.0 123:42.0 126:64.0 127:174.0 128:542.0 130:239.0 131:679.0 133:625.0 134:398.0 135:533.0 136:148.0 138:53.0 139:31.0 140:20.0 141:147.0 142:247.0 143:114.0 144:137.0 145:96.0…				0.19	0	96	2333	280	560	284	1658	294	717	260	182	259	1274	1027	468	664	724	1325	980	491	1278	1728	613	381	638	295	233	299	261	74	203	50	63	374	2044	202	1361	30	31	992	407
104387	866818	237	104387	89:60.0 90:53.0 91:731.0 93:124.0 95:73.0 96:53.0 97:147.0 101:131.0 107:133.0 115:63.0 116:250.0 119:389.0 128:267.0 129:311.0 130:123.0 131:321.0 134:39.0 137:44.0 141:81.0 146:99.0 153:109.0 155:95.0 157:121.0 158:95.0 161:126.0 165:93.0 167:36.0 168:55.0 169:43.0 172:128.0 173:95.0 176:54.0 183:469.0 185:75.0 188:47.0 190:67.0 194:106.0 195:107.0 200:23.0 203:115.0 204:193.0 207:66.0 208:507.…				0.91	0.38	11583	4141	10471	12258	9579	1147	15455	4510	1129	1656	1294	3642	6376	5665	2409	3963	1950	1197	1167	15061	5171	689	1899	2983	780	2509	4054	5666	11863	17985	16701	6999	8423	12122	2472	4288	1092	1808	17692	838
104370	1103610	255	104370	86:408.0 87:83.0 88:135.0 90:138.0 91:3528.0 92:330.0 93:2595.0 96:752.0 97:664.0 98:142.0 99:285.0 100:27.0 101:162.0 102:481.0 103:580.0 104:331.0 105:2951.0 106:495.0 107:3515.0 109:1435.0 112:126.0 113:488.0 116:1308.0 117:1559.0 118:271.0 119:1726.0 120:522.0 121:2220.0 122:667.0 123:337.0 124:129.0 125:513.0 127:291.0 128:537.0 129:3264.0 130:770.0 131:1220.0 132:154.0 133:1400.0 134:1000.0…				0.32	0	13341	62625	16841	27967	14868	72363	7037	17076	17399	10197	26774	110047	14412	1871	20002	5741	11770	9807	11270	17496	12779	1408	5549	8993	11124	37084	29322	15966	9148	16901	72189	17396	23388	30182	11274	95354	212	2335	19441	17922
104366	1050985	259	104366	85:616.0 86:417.0 87:416.0 88:243.0 89:3159.0 90:250.0 91:763.0 92:149.0 93:685.0 94:251.0 95:792.0 96:97.0 97:2665.0 98:288.0 99:606.0 100:725.0 101:1786.0 102:910.0 103:13031.0 104:1267.0 105:1806.0 106:247.0 107:468.0 108:107.0 109:289.0 110:111.0 111:21.0 112:197.0 113:575.0 114:426.0 115:1798.0 116:2139.0 117:4015.0 118:369.0 119:1241.0 121:375.0 122:105.0 123:86.0 124:24.0 125:190.0 126:119…				0.43	0	11354	929	21537	5824	2974	541	5074	10341	689	871	781	1891	1807	2151	1795	1558	388	350	1525	2586	597	1219	557	4091	857	1317	407	2141	1576	1233	1111	1034	1327	595	525	1092	108	30	1066	913
104365	836715	259	104365	85:613.0 86:419.0 87:595.0 88:273.0 89:3908.0 90:363.0 91:235.0 92:54.0 94:157.0 96:123.0 97:2172.0 98:239.0 99:656.0 100:1044.0 101:4583.0 102:1076.0 103:15069.0 104:1351.0 105:2121.0 106:218.0 107:147.0 110:59.0 111:303.0 112:160.0 113:620.0 114:724.0 115:1848.0 116:2255.0 117:3653.0 118:430.0 119:491.0 120:64.0 121:66.0 123:20.0 124:23.0 125:117.0 126:176.0 127:871.0 128:252.0 129:8299.0 130:1…				0.58	0	39768	1815	42733	26261	7910	1358	25437	17068	5275	2055	2259	9717	8249	8914	6473	4341	2730	887	3081	9012	1462	4196	2810	16050	4361	3677	1176	6229	6629	4307	2999	7516	5600	1889	1351	4341	315	1042	1196	2349
104238	881530	317	104238	86:574.0 87:145.0 88:588.0 89:453.0 90:232.0 91:2500.0 94:572.0 95:2766.0 96:885.0 97:807.0 99:548.0 100:994.0 101:1607.0 103:4828.0 104:591.0 109:5898.0 110:339.0 111:410.0 112:195.0 114:567.0 115:1602.0 116:1249.0 118:284.0 119:1555.0 120:357.0 121:394.0 122:270.0 123:453.0 125:815.0 126:105.0 128:1500.0 129:8563.0 130:1362.0 131:1965.0 133:1488.0 134:604.0 136:709.0 137:1483.0 138:156.0 142:32…				0.3	0	1165	1047	657	939	457	794	903	420	869	450	807	150	815	1236	723	371	416	213	1335	294	466	252	391	379	661	564	918	555	911	1008	562	338	684	336	484	655	259	326	418	788
104131	753888	85	104131	85:230310.0 86:13494.0 93:491.0 94:434.0 95:1018.0 96:1969.0 97:1748.0 98:100060.0 99:15827.0 100:1496.0 107:112.0 108:271.0 109:191.0 110:1159.0 111:1216.0 112:11823.0 113:923.0 122:215.0 123:48.0 124:1199.0 125:580.0 126:2566.0 127:855.0 135:77.0 136:173.0 138:485.0 139:135.0 140:11053.0 141:1243.0 150:61.0 151:17.0 152:238.0 154:6980.0 155:545.0 166:128.0 167:65.0 168:1878.0 169:345.0 174:137.…				0	0.33	2780	1951	2973	2170	1072	1339	1930	1606	1289	1433	1716	562	2009	1881	1627	1069	923	713	4334	2151	1522	1030	644	1294	1536	1283	2915	1561	1745	2396	2706	2742	2431	827	940	1597	403	813	3895	1481
102821	840601	173	102821	85:254.0 86:159.0 87:252.0 88:89.0 89:1637.0 90:85.0 91:110.0 95:34.0 97:83.0 98:64.0 99:157.0 100:216.0 101:581.0 102:99.0 103:3085.0 104:321.0 105:249.0 111:78.0 112:137.0 113:198.0 114:200.0 115:183.0 116:301.0 117:1753.0 118:139.0 119:150.0 121:29.0 126:76.0 127:228.0 128:51.0 129:1243.0 130:192.0 131:478.0 132:132.0 133:1044.0 134:144.0 135:102.0 136:28.0 138:44.0 139:26.0 140:38.0 141:27.0 …				0.14	0	934	1660	1121	1054	7801	1762	1190	1028	10170	10389	550	1544	796	1394	909	471	6881	1365	5472	933	1380	7758	663	613	12537	1820	1338	1409	1301	1309	187	847	1391	1193	696	2346	308	1250	1181	1608
102733	929900	271	102733	85:135.0 86:75.0 87:175.0 88:150.0 89:1877.0 90:208.0 94:53.0 95:48.0 97:79.0 99:186.0 100:115.0 101:740.0 102:185.0 103:5733.0 104:454.0 105:934.0 106:107.0 107:88.0 109:133.0 110:86.0 111:242.0 112:109.0 113:284.0 114:183.0 115:154.0 116:359.0 117:4611.0 118:449.0 119:290.0 120:31.0 127:129.0 128:181.0 129:2860.0 130:333.0 131:867.0 132:155.0 133:2044.0 134:236.0 135:183.0 139:67.0 140:47.0 141…				0.37	0.01	291	92	223	85	78	222	215	192	146	102	295	113	552	189	86	152	96	113	188	207	332	175	55	112	123	174	211	523	185	130	297	281	204	215	47	241	1467	343	172	105
102728	974053	271	102728	85:849.0 86:366.0 87:399.0 88:513.0 89:4127.0 90:437.0 91:562.0 92:21.0 94:99.0 96:263.0 97:707.0 98:257.0 99:777.0 100:1676.0 101:2658.0 102:1373.0 103:13253.0 104:1535.0 105:1901.0 106:145.0 107:161.0 109:384.0 111:554.0 112:171.0 113:1001.0 114:457.0 115:505.0 116:1331.0 117:10251.0 118:1068.0 119:1692.0 121:240.0 122:65.0 124:36.0 125:202.0 126:439.0 127:308.0 128:396.0 129:7457.0 130:1838.0 …				0.2	0	1361	227	305	340	169	230	257	152	117	76	2141	206	275	177	145	227	44	71	117	83	112	275	50	142	185	135	274	180	254	354	243	226	820	434	113	262	6586	76	593	77
102716	964735	271	102716	85:203.0 86:198.0 87:266.0 88:75.0 89:1548.0 90:104.0 91:111.0 95:46.0 97:92.0 98:40.0 99:222.0 100:517.0 101:1287.0 102:465.0 103:3250.0 104:260.0 105:641.0 109:113.0 111:419.0 112:45.0 113:260.0 114:264.0 115:253.0 116:484.0 117:3556.0 118:296.0 119:295.0 121:35.0 122:63.0 126:97.0 127:258.0 128:109.0 129:2739.0 130:572.0 131:730.0 132:108.0 133:1782.0 134:265.0 135:95.0 136:24.0 141:123.0 142:…				0.33	0	216	85	119	370	0	188	217	428	121	84	63	167	231	110	285	171	29	53	39	117	134	70	39	297	180	157	139	381	313	269	345	450	637	205	90	120	14019	366	313	78
[truncated: 218 more rows]
[truncated: 72 more columns]

## Sheet: sample analysis
Analysis
MiniX:	607518
Client Name:	Karin Allenspach
Matrix:	Dog feces and serum
Sample Number:	160
Method:	Primary Metabolomics
Exraction Notes:	Sample _085 not run due to no sample present.
Parameters:
Instrument:	GCTOF - B
Resuspension Volume:	100 uL
Injection Volume:	0.5 uL
Start Date:	Serum 7/12/2021 Feces 8/23/2021
[truncated: 13 more rows]
